# Supplementary material
Source: publisher figshare collection journal article supplement (https://acs.figshare.com/ndownloader/files/10615612)
Supplement: Supplementary file 1 [file 10615612]

## Sheet: Caption
Table S1
SWATH Protein abundances in hopped wort, sweet wort, and bright beer.

## Sheet: Area - ions
Protein	Peptide	Precursor MZ	Precursor Charge		RT	Fragment MZ	Fragment Charge	Ion Type	Residue	20141127_Michele_SWATH_S2_1 (20141127_Michele_SWATH_S2_1.wiff (sample 1))	20141127_Michele_SWATH_S2_2 (20141127_Michele_SWATH_S2_2.wiff (sample 1))	20141127_Michele_SWATH_S2_3 (20141127_Michele_SWATH_S2_3.wiff (sample 1))	20141127_Michele_SWATH_S2_5 (20141127_Michele_SWATH_S2_4.wiff (sample 1))	20141127_Michele_SWATH_S2_6 (20141127_Michele_SWATH_S2_5.wiff (sample 1))	20141127_Michele_SWATH_S2_7 (20141127_Michele_SWATH_S2_6.wiff (sample 1))	20141127_Michele_SWATH_S2_9 (20141127_Michele_SWATH_S2_7.wiff (sample 1))	20141127_Michele_SWATH_S2_10 (20141127_Michele_SWATH_S2_8.wiff (sample 1))	20141127_Michele_SWATH_S2_11 (20141127_Michele_SWATH_S2_9.wiff (sample 1))	20141127_Michele_SWATH_S2_13 (20141127_Michele_SWATH_S2_10.wiff (sample 1))	20141127_Michele_SWATH_S2_14 (20141127_Michele_SWATH_S2_11.wiff (sample 1))	20141127_Michele_SWATH_S2_15 (20141127_Michele_SWATH_S2_12.wiff (sample 1))	20141127_Michele_SWATH_S3_1 (20141127_Michele_SWATH_S3_1.wiff (sample 1))	20141127_Michele_SWATH_S3_2 (20141127_Michele_SWATH_S3_2.wiff (sample 1))	20141127_Michele_SWATH_S3_3 (20141127_Michele_SWATH_S3_3.wiff (sample 1))	20141127_Michele_SWATH_S3_5 (20141127_Michele_SWATH_S3_5.wiff (sample 1))	20141127_Michele_SWATH_S3_6 (20141127_Michele_SWATH_S3_6.wiff (sample 1))	20141127_Michele_SWATH_S3_7 (20141127_Michele_SWATH_S3_7.wiff (sample 1))	20141127_Michele_SWATH_S3_9 (20141127_Michele_SWATH_S3_9.wiff (sample 1))	20141127_Michele_SWATH_S3_10 (20141127_Michele_SWATH_S3_10.wiff (sample 1))	20141127_Michele_SWATH_S3_11 (20141127_Michele_SWATH_S3_11.wiff (sample 1))	20141127_Michele_SWATH_S3_13 (20141127_Michele_SWATH_S3_13.wiff (sample 1))	20141127_Michele_SWATH_S3_14 (20141127_Michele_SWATH_S3_14.wiff (sample 1))	20141127_Michele_SWATH_S3_15 (20141127_Michele_SWATH_S3_15.wiff (sample 1))	20141127_Michele_SWATH_SI_1 (20141127_Michele_SWATH_SI_1.wiff (sample 1))	20141127_Michele_SWATH_SI_2 (20141127_Michele_SWATH_SI_2.wiff (sample 1))	20141127_Michele_SWATH_SI_3 (20141127_Michele_SWATH_SI_3.wiff (sample 1))	20141127_Michele_SWATH_SI_5 (20141127_Michele_SWATH_SI_5.wiff (sample 1))	20141127_Michele_SWATH_SI_6 (20141127_Michele_SWATH_SI_6.wiff (sample 1))	20141127_Michele_SWATH_SI_7 (20141127_Michele_SWATH_SI_7.wiff (sample 1))	20141127_Michele_SWATH_SI_9 (20141127_Michele_SWATH_SI_9.wiff (sample 1))	20141127_Michele_SWATH_SI_10 (20141127_Michele_SWATH_SI_10.wiff (sample 1))	20141127_Michele_SWATH_SI_11 (20141127_Michele_SWATH_SI_11.wiff (sample 1))	20141127_Michele_SWATH_SI_13 (20141127_Michele_SWATH_SI_13.wiff (sample 1))	20141127_Michele_SWATH_SI_14 (20141127_Michele_SWATH_SI_14.wiff (sample 1))	20141127_Michele_SWATH_SI_15 (20141127_Michele_SWATH_SI_15.wiff (sample 1))
tr|M0UEE6|M0UEE6_HORVD	ISYQFEASSLLR	707.372	2	y8	19.1151	922.499	1	y	8	5.15915e+06	4.48812e+06	3.56291e+06	3.75306e+06	3.14651e+06	5.21217e+06	2.93881e+06	2.45851e+06	2.77857e+06	4.7459e+06	2.7954e+06	3.08631e+06	2.9622e+06	3.06156e+06	3.09213e+06	3.1226e+06	3.79104e+06	2.44843e+06	2.13926e+06	1.88807e+06	2.04666e+06	2.4789e+06	1.9405e+06	1.53347e+06	2.83236e+06	3.37554e+06	1.82502e+06	1.03203e+06	309182	140854	2.28167e+06	2.32128e+06	2.95811e+06	2.30808e+06	2.43499e+06	2.71215e+06
tr|M0UEE6|M0UEE6_HORVD	ISYQFEASSLLR	707.372	2	y7	19.1151	775.431	1	y	7	3.79811e+06	3.29098e+06	2.60611e+06	2.76325e+06	2.2408e+06	3.82805e+06	2.19766e+06	1.89738e+06	2.07255e+06	3.65969e+06	1.93818e+06	2.38023e+06	2.17981e+06	2.21353e+06	2.31612e+06	2.28621e+06	2.81908e+06	1.66231e+06	1.44088e+06	1.28981e+06	1.26832e+06	1.65238e+06	1.30856e+06	918757	1.97407e+06	2.26286e+06	1.42645e+06	899901	357120	260983	1.60171e+06	1.6115e+06	2.25757e+06	1.57211e+06	1.58459e+06	1.91175e+06
tr|M0UEE6|M0UEE6_HORVD	ISYQFEASSLLR	707.372	2	y9	19.1151	1050.56	1	y	9	2.18915e+06	1.90897e+06	1.40546e+06	1.58163e+06	1.24341e+06	2.20535e+06	1.17601e+06	1.02205e+06	1.03659e+06	1.77069e+06	1.13877e+06	1.31233e+06	1.02129e+06	1.20558e+06	1.27618e+06	1.08891e+06	1.54928e+06	934622	740065	660744	742089	957588	702393	539185	1.06478e+06	1.27046e+06	564461	302307	123254	87647.2	884895	954842	1.18288e+06	849913	943437	1.067e+06
tr|M0UEE6|M0UEE6_HORVD	ISYQFEASSLLR	707.372	2	y11	19.1151	1300.65	1	y	11	1.41372e+06	1.21668e+06	893311	1.01702e+06	731499	1.36427e+06	764845	589553	682716	1.28824e+06	663071	800620	691424	703479	727970	725622	928778	527510	505738	397929	427434	582012	427671	317470	653412	675748	324788	175367	83764.4	39757.3	557467	526496	740331	532260	567056	709450
tr|M0UEE6|M0UEE6_HORVD	ISYQFEASSLLR	707.372	2	y10	19.1151	1213.62	1	y	10	1.22904e+06	1.0816e+06	761912	869530	606352	1.18821e+06	657567	508689	596693	1.11234e+06	575923	721525	593167	627355	658462	643089	834850	473481	397966	363520	374036	501070	371853	283525	583339	654368	268904	170001	77091.4	42341.4	493808	454216	612821	476313	500602	572689
tr|M0UEE6|M0UEE6_HORVD	ISYQFEASSLLR	707.372	2	b7	19.1151	839.393	1	b	7	275153	250623	215297	234132	161686	211134	229931	193189	247042	354694	253984	221432	226000	221143	241222	203468	251319	151357	192367	194564	216421	195799	185246	125152	234506	277738	180112	120538	60034.5	47519.2	225242	248289	225615	212809	200699	237465
tr|M0UEE6|M0UEE6_HORVD	AAGNVAFSPLSLHVALSLITAGAGGATR	874.817	3	y23	30.0098	1105.62	2	y	23	1.71439e+06	1.60128e+06	1.23363e+06	1.2083e+06	1.00897e+06	1.80957e+06	911333	668951	811605	1.51086e+06	731811	973056	936626	885770	889557	966046	1.1301e+06	697888	537429	362428	451060	823383	532723	364989	997695	1.13117e+06	483719	202165	64302.1	34502	822992	685404	904248	677449	720375	805310
tr|M0UEE6|M0UEE6_HORVD	AAGNVAFSPLSLHVALSLITAGAGGATR	874.817	3	y14	30.0098	1258.71	1	y	14	4.35788e+06	3.84807e+06	2.92404e+06	2.89832e+06	2.46337e+06	4.36271e+06	2.19137e+06	1.55822e+06	1.83577e+06	3.75556e+06	1.75637e+06	2.16634e+06	2.15915e+06	2.059e+06	2.13314e+06	2.23494e+06	2.83479e+06	1.57139e+06	1.24612e+06	772620	891940	1.90804e+06	1.16062e+06	738943	2.46572e+06	2.65821e+06	1.17563e+06	484694	279441	119609	1.96975e+06	1.66941e+06	2.3311e+06	1.61614e+06	1.70113e+06	1.97018e+06
tr|M0UEE6|M0UEE6_HORVD	AAGNVAFSPLSLHVALSLITAGAGGATR	874.817	3	y22	30.0098	1070.1	2	y	22	1.12186e+06	991809	811548	827346	704194	1.23049e+06	592201	447473	516124	1.04056e+06	497217	599370	595962	563330	586007	605804	763545	433017	366365	224763	276968	541386	344011	218711	644648	674843	323676	147218	88866.4	32483.4	546519	443910	641969	449484	448463	527924
tr|M0UEE6|M0UEE6_HORVD	AAGNVAFSPLSLHVALSLITAGAGGATR	874.817	3	y12	30.0098	1074.59	1	y	12	3.0103e+06	2.62613e+06	1.98332e+06	2.02425e+06	1.72544e+06	3.15867e+06	1.44134e+06	1.08289e+06	1.25784e+06	2.55884e+06	1.17239e+06	1.47587e+06	1.47651e+06	1.42146e+06	1.43194e+06	1.51925e+06	1.96788e+06	1.03843e+06	792682	489843	597691	1.26905e+06	744656	475922	1.76707e+06	1.95923e+06	880184	454404	344978	116844	1.37812e+06	1.11002e+06	1.59647e+06	1.06995e+06	1.1061e+06	1.33121e+06
tr|M0UEE6|M0UEE6_HORVD	AAGNVAFSPLSLHVALSLITAGAGGATR	874.817	3	y21	30.0098	996.565	2	y	21	964125	880712	692732	661633	576665	1.0603e+06	489849	374798	414689	898390	409289	513286	495804	456967	485561	509518	661822	362657	275799	179512	202902	446875	279402	166620	525405	641809	275062	140100	97808.7	52610	455499	376951	545241	364496	391259	461357
tr|M0UEE6|M0UEE6_HORVD	AAGNVAFSPLSLHVALSLITAGAGGATR	874.817	3	y15	30.0098	1357.78	1	y	15	2.43271e+06	2.09686e+06	1.56088e+06	1.60219e+06	1.3426e+06	2.47762e+06	1.13309e+06	853512	998504	2.09653e+06	916599	1.15066e+06	1.12811e+06	1.08527e+06	1.12441e+06	1.18815e+06	1.47665e+06	834981	645230	384631	479057	1.00556e+06	611581	389191	1.3214e+06	1.40473e+06	610871	247868	207298	95659.3	1.0643e+06	865976	1.2217e+06	827608	902428	1.03878e+06
tr|M0UEE6|M0UEE6_HORVD	DQLVAILGDGGAGDAK	750.389	2	y12	17.0013	1044.53	1	y	12	893352	235258	634581	676260	505186	328061	706895	140156	756343	1.05974e+06	632973	759069	127847	621799	623258	549456	720123	401590	475563	383368	419851	484670	87704.7	306215	355751	424577	233426	119833	9104.01	40741.8	354681	61402	585390	342960	70740.3	459094
tr|M0UEE6|M0UEE6_HORVD	DQLVAILGDGGAGDAK	750.389	2	y10	17.0013	860.411	1	y	10	954311	266584	647313	691343	518020	372686	761401	151993	785844	1.15363e+06	695444	821689	138566	678009	639815	562630	742778	394172	482263	359345	391889	496548	91073.3	285902	361146	444105	242449	137764	7227.65	52483.2	358386	62779	586065	331445	72381	454631
tr|M0UEE6|M0UEE6_HORVD	DQLVAILGDGGAGDAK	750.389	2	y11	17.0013	973.495	1	y	11	547699	134623	377222	382386	289616	198852	441235	79573.2	452495	686696	385226	462013	69107.1	364116	352188	316753	409932	211338	270685	200218	216625	263789	46425.4	157963	199389	234662	125658	76550.2	6126.54	35908.2	200587	35579.7	330950	177831	37326.6	254733
tr|M0UEE6|M0UEE6_HORVD	DQLVAILGDGGAGDAK	750.389	2	y13	17.0013	1143.6	1	y	13	427949	85904.8	287296	295982	213725	126782	335740	49840.3	334247	505887	289814	355021	45221.3	284858	281561	242668	312647	162884	209774	155274	168827	201989	30875	120926	151605	184384	96448.7	52010.6	2937.51	23746.6	149265	24486.7	248225	145405	24241.2	198417
tr|M0UEE6|M0UEE6_HORVD	DQLVAILGDGGAGDAK	750.389	2	y14	17.0013	1256.68	1	y	14	161174	25630.2	91866.3	101654	73852.5	36793.6	121515	12656.9	124198	191415	103484	124643	13254.8	92896.4	93642	82607.9	109492	50980	67354.3	49433.1	55586.7	71454.9	8274.92	39139.2	51191.4	59748.1	33366.9	21031.2	1363.85	15237.6	50349.2	5772.71	95177.8	46083.2	7288.98	64690.8
tr|M0UEE6|M0UEE6_HORVD	DQLVAILGDGGAGDAK	750.389	2	b8	17.0013	810.472	1	b	8	50457.8	19931.9	0	0	0	24531.6	39418	9642.69	0	56279.4	35346.7	39576.7	8369.99	0	0	0	0	0	0	0	0	0	5567.43	0	0	22486.8	15806.9	7433.19	1164.1	10206.1	0	4436.94	0	0	4050.94	0
tr|M0UEE6|M0UEE6_HORVD	ELNALAEQVVQFVLANESSTGGPR	843.77	3	y9	32.1892	904.412	1	y	9	2.25158e+06	2.03649e+06	1.50548e+06	1.73676e+06	1.32281e+06	2.04287e+06	1.55475e+06	1.12946e+06	1.69424e+06	2.2731e+06	1.31242e+06	1.68658e+06	1.23436e+06	1.42732e+06	1.34207e+06	1.21677e+06	1.50372e+06	908836	891467	707070	862156	1.14825e+06	834591	599526	1.05803e+06	1.23589e+06	577326	255135	145601	1169.35	896876	834645	1.18309e+06	788702	920232	1.03081e+06
tr|M0UEE6|M0UEE6_HORVD	ELNALAEQVVQFVLANESSTGGPR	843.77	3	y10	32.1892	975.449	1	y	10	2.30102e+06	2.16308e+06	1.51803e+06	1.82957e+06	1.41066e+06	1.99543e+06	1.68958e+06	1.27248e+06	1.85499e+06	2.51987e+06	1.38194e+06	1.74929e+06	1.41027e+06	1.57491e+06	1.47951e+06	1.36782e+06	1.66821e+06	1.02538e+06	974714	786587	935184	1.30832e+06	907098	667128	1.19466e+06	1.34873e+06	618712	269524	150763	0	951232	923913	1.26461e+06	889978	1.01942e+06	1.10506e+06
tr|M0UEE6|M0UEE6_HORVD	ELNALAEQVVQFVLANESSTGGPR	843.77	3	y11	32.1892	1088.53	1	y	11	2.02594e+06	1.91848e+06	1.34545e+06	1.57878e+06	1.22519e+06	1.89952e+06	1.4747e+06	1.11222e+06	1.57222e+06	2.12697e+06	1.22735e+06	1.51536e+06	1.1823e+06	1.3886e+06	1.31056e+06	1.19922e+06	1.44041e+06	880918	868361	689125	839132	1.09811e+06	809824	594369	1.01003e+06	1.12809e+06	528010	224325	110857	869.967	841085	847763	1.13437e+06	796987	882102	1.05091e+06
tr|M0UEE6|M0UEE6_HORVD	ELNALAEQVVQFVLANESSTGGPR	843.77	3	y12	32.1892	1187.6	1	y	12	816559	749496	468616	578184	404687	690850	479793	352687	553962	857547	400741	538608	382731	429219	429363	363717	468995	287905	265314	205899	257204	347007	247744	179554	306789	348054	148331	69752	44484.4	4734.22	252279	243691	363660	233435	274075	334308
tr|M0UEE6|M0UEE6_HORVD	ELNALAEQVVQFVLANESSTGGPR	843.77	3	b9	32.1892	968.505	1	b	9	925245	847902	525249	645575	466152	754471	562302	409400	612461	888332	465923	627512	427182	511319	488823	428520	549303	317983	307646	249880	295084	397179	287508	201135	355527	423989	195987	94045.5	62208.5	598.856	297683	299391	409472	278132	324210	392373
tr|M0UEE6|M0UEE6_HORVD	ELNALAEQVVQFVLANESSTGGPR	843.77	3	b8	32.1892	869.436	1	b	8	570755	534229	337949	424575	294076	548037	357648	251356	382301	608469	280678	392690	273271	324347	310639	276378	341156	190271	185733	141414	181776	243084	170310	118551	224137	276944	124696	78419.7	60540	711.78	183420	171374	252960	175449	186429	219675
tr|M0UEE6|M0UEE6_HORVD	TLEAVGQVNSWVEQVTTGLIK	758.078	3	y9	30.9074	988.567	1	y	9	1.52122e+06	1.45823e+06	1.07206e+06	1.26126e+06	982856	1.3824e+06	1.10729e+06	700515	1.16511e+06	1.66652e+06	942913	1.23671e+06	1.05962e+06	911184	899687	1.01063e+06	1.17802e+06	732630	722151	687383	799311	960969	862320	487479	1.0305e+06	1.08045e+06	587457	334868	144734	71557.8	1.0128e+06	963796	1.1995e+06	890367	1.01245e+06	1.02132e+06
tr|M0UEE6|M0UEE6_HORVD	TLEAVGQVNSWVEQVTTGLIK	758.078	3	y10	30.9074	1087.64	1	y	10	965583	942307	717923	796790	626758	903620	696150	424635	751626	1.13168e+06	566425	806726	651701	582765	561237	606260	748471	453160	422938	415179	479604	613618	511108	277207	656185	670385	333455	196899	95993.5	49426.3	616044	595275	763805	527054	630438	644742
tr|M0UEE6|M0UEE6_HORVD	TLEAVGQVNSWVEQVTTGLIK	758.078	3	y8	30.9074	859.525	1	y	8	911853	850175	626775	733490	562254	852397	607414	372325	650784	946646	537863	717136	566268	514929	482617	546992	644599	368710	364066	341424	413747	524445	448193	240798	566627	626773	311203	211136	114151	63123.8	550869	516277	681374	471920	566724	543063
tr|M0UEE6|M0UEE6_HORVD	TLEAVGQVNSWVEQVTTGLIK	758.078	3	b8	30.9074	798.436	1	b	8	507621	444064	320059	366541	280482	455894	322068	183689	347686	532605	271335	369387	279595	243793	249055	275732	328303	187525	167829	166460	195784	266509	221401	104524	284786	338523	165300	116448	74824.9	46022.9	269228	257736	346621	236243	280828	287644
tr|M0UEE6|M0UEE6_HORVD	TLEAVGQVNSWVEQVTTGLIK	758.078	3	b10	30.9074	999.511	1	b	10	454523	432506	317293	349311	273991	425301	316375	186050	320534	537559	252898	356062	282383	253292	240764	286616	320607	186480	185529	168234	209902	260349	228122	115866	285625	312635	140651	99007.2	57360.7	31606.2	275182	252556	342561	228827	278173	285750
tr|M0UEE6|M0UEE6_HORVD	TLEAVGQVNSWVEQVTTGLIK	758.078	3	y12	30.9074	1360.75	1	y	12	225375	199372	150810	170699	123472	218725	138741	89435.9	151053	245219	117145	169472	123548	117748	113832	121877	159227	82869.1	78766.9	79317.3	97063.7	126945	104203	48415	128056	134780	60141.7	46030.1	23835.6	15836	124971	119706	167177	108013	127430	137528
tr|M0UEE6|M0UEE6_HORVD	QFSMYILLPGAQDGLWSLAK	1119.58	2	y12	31.439	1242.65	1	y	12	1.25513e+06	1.01035e+06	919540	985091	649620	1.43952e+06	600448	617692	570181	1.10068e+06	536298	900384	703031	755832	727841	706401	1.00869e+06	555374	477914	316808	372694	743010	413940	314990	786393	1.01385e+06	378719	164566	128208	43862.9	621317	761396	1.06942e+06	723611	626085	774056
tr|M0UEE6|M0UEE6_HORVD	QFSMYILLPGAQDGLWSLAK	1119.58	2	y14	31.439	1468.82	1	y	14	284605	227976	186450	220253	122865	330011	108909	111783	96291	229912	96773.2	190716	132675	148980	140974	130009	204829	94930.3	80199.3	51434	60029.8	150836	70055	52663.4	146056	207597	70055.4	34687.3	37926.8	17512.3	113808	140184	228812	137556	114660	155942
tr|M0UEE6|M0UEE6_HORVD	QFSMYILLPGAQDGLWSLAK	1119.58	2	y13	31.439	1355.73	1	y	13	359419	288087	239585	279355	162372	411176	137126	137978	125880	289130	121403	241166	166509	183729	172158	161918	253256	118048	99557	65542.4	78881.2	177374	84594	65398.1	186066	260488	86535.6	49803.3	43617.1	17324.5	144860	175568	292646	168428	150752	190916
tr|M0UEE6|M0UEE6_HORVD	QFSMYILLPGAQDGLWSLAK	1119.58	2	y15	31.439	1581.9	1	y	15	121351	97996.3	74306.3	86952.8	52287.7	143388	45685.7	50447.4	41626.4	99198.5	41200.1	82855.9	56799.3	64371.6	54708.7	57198.3	91042.4	40854.1	35138.3	20101.8	25991.2	58912	26698.4	19459.5	58163.2	86149.8	30782.1	17026.7	20453.9	11101.8	47530	61564.4	94117.5	56056.1	49566.7	65849.3
tr|M0UEE6|M0UEE6_HORVD	QFSMYILLPGAQDGLWSLAK	1119.58	2	y11	31.439	1145.59	1	y	11	136280	101019	84294.5	95804.9	56249.9	161000	44277.1	45585.2	40089.6	108449	37199.8	80359.7	56947.8	66975.8	61201.6	53939.3	93426.9	39987.5	34081.2	18706.8	25075.3	61640.4	25831.8	21537	72975.6	95658.2	33894.4	22070.9	27042.9	12307.2	48559.9	60980.4	104128	57118.6	48415.1	66441.8
tr|M0UEE6|M0UEE6_HORVD	QFSMYILLPGAQDGLWSLAK	1119.58	2	y16	31.439	1744.96	1	y	16	56539.5	48246	0	42476	0	70726	0	0	0	51781.5	0	40037.9	0	30333.4	0	0	42075.1	0	0	0	0	0	0	0	0	0	0	10616.6	12200.9	8272.43	0	30814.3	45108.6	0	0	33116.1
tr|M0Y227|M0Y227_HORVD	DYVLQQTC[CAM]AVFTPGSK	907.443	2	y10	17.1936	1067.52	1	y	10	1.13377e+06	1.04688e+06	1.00037e+06	862086	668595	921204	891208	744527	996068	1.28141e+06	877635	856783	576130	556401	714964	531540	648507	357964	501048	477522	550968	600465	486247	392062	714896	793640	388812	1518.76	64942.8	1617.45	853096	843356	1.14788e+06	804272	866025	997734
tr|M0Y227|M0Y227_HORVD	DYVLQQTC[CAM]AVFTPGSK	907.443	2	y11	17.1936	1195.58	1	y	11	1.0017e+06	932872	881665	743034	597977	769548	778529	661563	848463	1.16491e+06	762833	769653	526113	519382	611940	474042	597979	329052	450675	447987	477305	548486	431356	372811	639344	652849	311909	699.731	60995.3	644.825	744137	750279	1.00926e+06	668586	740454	864592
tr|M0Y227|M0Y227_HORVD	DYVLQQTC[CAM]AVFTPGSK	907.443	2	y12	17.1936	1323.64	1	y	12	742830	707618	655320	567663	452187	601444	604408	500798	693568	908200	573014	566414	396327	392284	485871	366568	447747	237119	353201	334864	379075	438127	337304	284344	481820	497536	225506	1317.1	43604.8	1612.8	580756	580810	775574	528804	593803	674713
tr|M0Y227|M0Y227_HORVD	DYVLQQTC[CAM]AVFTPGSK	907.443	2	y9	17.1936	966.471	1	y	9	900053	800615	767113	641945	513299	712742	664254	562284	769505	1.04469e+06	648015	654017	426653	406103	527817	371576	480944	234768	347518	338852	385998	456385	340485	262255	548472	594435	306061	0	56581.1	0	655789	641033	904086	592201	630433	763181
tr|M0Y227|M0Y227_HORVD	DYVLQQTC[CAM]AVFTPGSK	907.443	2	b10	17.1936	1178.55	1	b	10	717966	683659	643804	529799	418205	569998	556933	466633	623895	817405	554783	538543	327516	343991	420558	292881	391508	199972	289932	275728	316512	379065	286270	230039	427466	452571	200808	1238.9	34255.2	1254	541976	523220	726561	495613	547194	631864
tr|M0Y227|M0Y227_HORVD	DYVLQQTC[CAM]AVFTPGSK	907.443	2	y13	17.1936	1436.72	1	y	13	564064	515528	503544	417414	324504	458686	429286	359820	507664	667897	433068	422226	271265	265412	335046	246784	313560	164665	230522	238526	250679	306827	228142	186833	322862	365350	165903	0	27760.6	323.746	410242	423480	574063	376220	429117	510868
tr|M0Y227|M0Y227_HORVD	LYC[CAM]C[CAM]QELAEIPQQC[CAM]R	984.442	2	y8	13.8385	1001.48	1	y	8	2.27277e+06	2.05567e+06	2.27461e+06	1.95708e+06	1.56686e+06	2.00159e+06	1.89468e+06	1.32326e+06	1.81668e+06	2.37245e+06	1.69921e+06	1.67517e+06	1.74053e+06	1.68241e+06	1.90546e+06	1.72333e+06	1.8087e+06	1.01797e+06	1.40669e+06	1.26232e+06	1.24608e+06	1.57687e+06	1.243e+06	983565	1.99939e+06	2.16254e+06	1.21722e+06	622723	135424	0	1.84141e+06	2.29343e+06	2.56557e+06	1.84914e+06	2.01066e+06	2.04748e+06
tr|M0Y227|M0Y227_HORVD	LYC[CAM]C[CAM]QELAEIPQQC[CAM]R	984.442	2	b10	13.8385	1280.56	1	b	10	347643	311979	319625	281759	206864	292475	264233	204679	273825	371923	252676	228923	236888	232071	273572	226126	260000	149776	191318	175888	191930	222302	175711	147645	262811	290598	132953	78414.7	23776.4	5799.35	256956	313142	345910	236569	280193	287273
tr|M0Y227|M0Y227_HORVD	LYC[CAM]C[CAM]QELAEIPQQC[CAM]R	984.442	2	y9	13.8385	1114.57	1	y	9	1.69228e+06	1.45363e+06	1.64556e+06	1.36648e+06	988195	1.41428e+06	1.23878e+06	916379	1.27152e+06	1.71578e+06	1.1827e+06	1.17571e+06	1.19082e+06	1.10765e+06	1.30511e+06	1.11354e+06	1.197e+06	641453	892300	815980	811326	1.06169e+06	776881	615417	1.29851e+06	1.44175e+06	715810	393480	81334.7	22087.4	1.26201e+06	1.60811e+06	1.84251e+06	1.20164e+06	1.38745e+06	1.43354e+06
tr|M0Y227|M0Y227_HORVD	LYC[CAM]C[CAM]QELAEIPQQC[CAM]R	984.442	2	y10	13.8385	1243.61	1	y	10	1.24884e+06	1.02254e+06	1.17553e+06	921336	635555	1.04202e+06	883094	598754	927333	1.2456e+06	850142	731597	827372	773875	908768	719085	835161	427005	589419	547548	558999	706392	505238	406536	850360	953321	429521	255371	47865.9	9837.94	899619	1.10566e+06	1.28806e+06	803813	986333	1.01558e+06
tr|M0Y227|M0Y227_HORVD	LYC[CAM]C[CAM]QELAEIPQQC[CAM]R	984.442	2	b9	13.8385	1167.48	1	b	9	508520	410104	452911	388631	305443	394535	364974	278032	389534	506010	361586	322075	340068	344060	397717	321662	358450	205406	273508	257108	267102	333139	238243	211187	355723	392215	193100	110001	30044.2	3367.15	357360	449086	512003	341119	406720	401127
tr|M0Y227|M0Y227_HORVD	LYC[CAM]C[CAM]QELAEIPQQC[CAM]R	984.442	2	y12	13.8385	1531.7	1	y	12	832686	636488	762388	549512	354705	596136	520568	337439	580116	850434	480792	424576	449761	414241	513966	384525	458454	217347	318110	291143	311539	423575	279113	221018	424401	531956	203932	123373	29495.6	0	478086	635667	783436	458654	574247	636731
tr|M0Y227|M0Y227_HORVD	AATDC[CAM]SPGVAFPTNLLGHC[CAM]R	715.339	3	y9	18.2366	1067.54	1	y	9	2.96894e+06	2.7468e+06	2.78451e+06	2.50306e+06	2.25108e+06	2.48395e+06	2.4166e+06	2.26694e+06	2.39915e+06	3.18056e+06	2.49221e+06	2.28732e+06	2.2725e+06	2.11794e+06	2.4462e+06	1.98885e+06	2.30557e+06	1.46356e+06	1.838e+06	1.75081e+06	1.80443e+06	2.12575e+06	1.72325e+06	1.45565e+06	2.41122e+06	2.25831e+06	1.34505e+06	683327	207168	108532	2.497e+06	2.45964e+06	2.976e+06	2.35106e+06	2.33641e+06	2.60682e+06
tr|M0Y227|M0Y227_HORVD	AATDC[CAM]SPGVAFPTNLLGHC[CAM]R	715.339	3	y14	18.2366	769.898	2	y	14	1.05109e+06	962337	1.01126e+06	904461	813716	910086	884168	815863	922242	1.10051e+06	914911	854120	773451	738609	831506	677892	800591	521011	639772	624071	627440	741402	619222	529040	861037	835887	520518	315433	96999.7	58911.8	897285	911486	1.07966e+06	855092	885809	958267
tr|M0Y227|M0Y227_HORVD	AATDC[CAM]SPGVAFPTNLLGHC[CAM]R	715.339	3	y10	18.2366	1214.61	1	y	10	972329	869510	882239	751865	644952	731506	738257	643251	765973	1.00758e+06	725331	677445	627435	567275	701712	537661	641064	382004	513337	482957	501351	592689	469881	392789	700852	667690	364105	197930	75901.1	51249.9	770966	808670	976562	715820	747302	834997
tr|M0Y227|M0Y227_HORVD	AATDC[CAM]SPGVAFPTNLLGHC[CAM]R	715.339	3	y11	18.2366	1285.65	1	y	11	955542	851939	867166	760352	636678	734119	726425	639643	776144	1.03516e+06	744484	686175	628223	558842	680470	534289	652944	380076	506257	476268	494552	591259	469899	382876	671109	622606	340640	185226	59315.4	52985.3	763565	782627	988390	707813	727062	834865
tr|M0Y227|M0Y227_HORVD	AATDC[CAM]SPGVAFPTNLLGHC[CAM]R	715.339	3	y8	18.2366	970.489	1	y	8	629791	545968	562807	506028	420199	483444	469351	411243	497280	646826	472814	449292	419067	366005	459208	339720	424801	236941	312454	305553	306275	378755	296477	239681	456750	450784	257182	158774	59540.8	63170	496125	517275	640079	464792	464587	503203
tr|M0Y227|M0Y227_HORVD	AATDC[CAM]SPGVAFPTNLLGHC[CAM]R	715.339	3	y7	18.2366	869.441	1	y	7	674531	571550	590518	520841	440207	519434	505316	439629	526990	660562	509984	472356	446027	381765	471472	362349	444994	244716	334390	312048	325114	394141	302237	242508	468386	473152	285920	183131	81271.2	65741.7	513518	537113	669877	478597	491781	540938
tr|M0Y227|M0Y227_HORVD	AAAATDC[CAM]SPGVAFPTNLLGHC[CAM]R	762.697	3	y9	18.393	1067.54	1	y	9	4.04133e+06	3.90314e+06	3.9088e+06	3.31441e+06	2.61465e+06	3.3236e+06	3.32104e+06	2.77136e+06	3.62446e+06	4.53061e+06	3.36473e+06	3.04342e+06	2.66575e+06	2.40975e+06	3.01872e+06	2.2231e+06	2.73817e+06	1.52061e+06	2.1325e+06	2.01428e+06	2.10819e+06	2.44125e+06	1.95375e+06	1.61994e+06	3.22011e+06	3.075e+06	1.63375e+06	853043	3693.19	166759	3.49588e+06	3.5262e+06	4.1683e+06	3.06546e+06	3.21506e+06	3.74162e+06
tr|M0Y227|M0Y227_HORVD	AAAATDC[CAM]SPGVAFPTNLLGHC[CAM]R	762.697	3	y10	18.393	1214.61	1	y	10	1.43545e+06	1.28465e+06	1.30668e+06	1.05667e+06	799505	1.06814e+06	1.10521e+06	910801	1.23404e+06	1.62716e+06	1.1357e+06	987198	794436	717304	936063	645119	843249	431033	691311	632801	675529	779960	616836	490474	972582	945419	431081	282137	214.053	67244.2	1.15214e+06	1.1972e+06	1.47347e+06	1.02968e+06	1.042e+06	1.30738e+06
tr|M0Y227|M0Y227_HORVD	AAAATDC[CAM]SPGVAFPTNLLGHC[CAM]R	762.697	3	y17	18.393	950.943	2	y	17	526380	474368	481127	429246	327494	402651	434964	382858	490939	562574	447540	408552	300441	281062	347782	256807	300841	183477	274714	267817	292620	313134	262017	219211	383819	367139	187442	111406	563.141	27327.9	435928	455933	559456	405448	426065	476209
tr|M0Y227|M0Y227_HORVD	AAAATDC[CAM]SPGVAFPTNLLGHC[CAM]R	762.697	3	y18	18.393	1001.47	2	y	18	750067	696890	667955	602375	468655	594443	622998	540557	673171	762961	615696	577800	498475	466265	559642	430274	498649	318777	430466	411122	442478	490292	392050	326870	618416	593028	332435	187302	1192.13	58583.2	640907	622545	738331	592260	611217	663543
tr|M0Y227|M0Y227_HORVD	AAAATDC[CAM]SPGVAFPTNLLGHC[CAM]R	762.697	3	y11	18.393	1285.65	1	y	11	1.49407e+06	1.32851e+06	1.31746e+06	1.1418e+06	816644	1.11669e+06	1.15199e+06	955906	1.31646e+06	1.65869e+06	1.15846e+06	1.05044e+06	874787	769635	970965	651983	836318	466270	716210	685616	722095	829909	642350	521497	949552	906299	448828	255745	683.685	56013.7	1.22832e+06	1.19149e+06	1.50323e+06	1.08687e+06	1.12938e+06	1.33906e+06
tr|M0Y227|M0Y227_HORVD	AAAATDC[CAM]SPGVAFPTNLLGHC[CAM]R	762.697	3	y15	18.393	813.414	2	y	15	480915	450278	447982	393480	299362	382740	413443	326000	462489	564481	408144	352948	288937	256557	332867	237943	294336	166195	247100	232686	248931	288258	224326	169235	359538	364991	198696	122556	1338.41	45171	412746	413348	554315	370573	368123	442588
tr|M0Y227|M0Y227_HORVD	ATDC[CAM]SPGVAFPTNLLGHC[CAM]R	691.66	3	y9	18.0883	1067.54	1	y	9	1.21691e+06	1.10737e+06	1.11291e+06	988231	798981	991814	880446	742427	880732	1.1731e+06	894072	848745	847300	762676	887787	756887	873338	540665	871740	613078	628135	761964	600244	700302	908797	924398	513746	276725	131401	595.485	925566	970644	1.24263e+06	915880	912580	1.00814e+06
tr|M0Y227|M0Y227_HORVD	ATDC[CAM]SPGVAFPTNLLGHC[CAM]R	691.66	3	y14	18.0883	769.898	2	y	14	467196	422710	449872	399506	349325	396167	369609	337329	364509	464349	373015	368631	362141	327924	364495	457075	503028	338894	398471	286063	389839	333354	379341	331983	373949	384319	243769	141066	47967.5	1310.6	387518	392175	496426	380901	368856	420854
tr|M0Y227|M0Y227_HORVD	ATDC[CAM]SPGVAFPTNLLGHC[CAM]R	691.66	3	y11	18.0883	1285.65	1	y	11	352150	311169	323101	278374	211113	271485	234630	192523	232737	367043	238350	225497	201724	188727	229402	182362	295352	123032	220744	200275	148402	195445	147846	161915	235188	233471	115911	73808.1	24545.2	1218.92	248024	269218	455021	245770	248434	307532
tr|M0Y227|M0Y227_HORVD	ATDC[CAM]SPGVAFPTNLLGHC[CAM]R	691.66	3	y10	18.0883	1214.61	1	y	10	393004	348295	352466	300558	236452	298154	256830	212345	264082	391112	270327	253648	240844	208432	254568	213089	234822	142212	174079	220335	164371	218552	164391	178474	256444	262769	136437	81719.5	36859.1	0	279360	302445	407186	278087	287434	323776
tr|M0Y227|M0Y227_HORVD	ATDC[CAM]SPGVAFPTNLLGHC[CAM]R	691.66	3	y7	18.0883	869.441	1	y	7	245886	211172	226610	191660	140349	196308	160770	133369	159943	254479	162083	203120	146819	132837	162000	133095	144742	79074.6	101274	101138	102344	133727	90820.3	106552	162391	175937	101917	69407.6	29094.3	385.695	166338	180093	257665	165445	166049	196515
tr|M0Y227|M0Y227_HORVD	ATDC[CAM]SPGVAFPTNLLGHC[CAM]R	691.66	3	y15	18.0883	813.414	2	y	15	259848	223059	226568	202305	163574	190451	173661	156729	179044	254563	191684	243155	181777	157889	177759	158110	170279	110514	134634	174467	124138	199555	124000	131842	189183	183303	117352	65780.2	26628.4	17955.8	192595	187506	259769	247399	191979	198341
tr|M0Y227|M0Y227_HORVD	TDC[CAM]SPGVAFPTNLLGHC[CAM]R	667.98	3	y9	18.1426	1067.54	1	y	9	1.09582e+06	945684	948033	845927	735397	856445	867428	780266	958042	1.20444e+06	798075	754088	647573	656147	710563	581061	725948	431129	563882	554354	570610	678224	547096	456715	739929	754232	467042	258103	92306	69760.2	912296	977656	1.22319e+06	880728	908707	1.03451e+06
tr|M0Y227|M0Y227_HORVD	TDC[CAM]SPGVAFPTNLLGHC[CAM]R	667.98	3	y14	18.1426	769.898	2	y	14	502323	439860	464194	466692	403707	429715	450391	407330	472573	547610	466322	435970	370661	349713	409094	302701	373812	250616	316102	283184	304350	351979	303130	257769	415326	382829	265101	160490	56010.9	36230.8	454440	478358	593731	444632	446317	500740
tr|M0Y227|M0Y227_HORVD	TDC[CAM]SPGVAFPTNLLGHC[CAM]R	667.98	3	y11	18.1426	1285.65	1	y	11	260748	222122	227273	216552	165155	194591	181577	172796	213655	292395	199523	193810	142192	144093	167515	123919	141568	85107.5	123152	116423	121061	147382	122673	96259.2	175662	159126	97137.9	56571.9	21304.9	18145.7	207255	228644	315679	204603	215664	253442
tr|M0Y227|M0Y227_HORVD	TDC[CAM]SPGVAFPTNLLGHC[CAM]R	667.98	3	y10	18.1426	1214.61	1	y	10	297366	250309	272826	219987	192850	224360	224685	193647	229973	341855	237763	199898	165018	157801	203725	155058	181950	104916	141959	135472	138649	168108	135242	111318	193104	184951	111893	69782.3	32223.4	24695.6	250788	271249	316273	236669	245041	286424
tr|M0Y227|M0Y227_HORVD	TDC[CAM]SPGVAFPTNLLGHC[CAM]R	667.98	3	y15	18.1426	813.414	2	y	15	224005	195773	195547	177769	143519	191014	159436	152898	163033	248581	165794	168956	146961	124891	161808	118803	142636	92487.9	136003	113088	109996	132751	108251	92303.7	163984	169322	106534	64691.9	27877.2	22938.3	168226	191677	250042	171479	174753	206713
tr|M0Y227|M0Y227_HORVD	TDC[CAM]SPGVAFPTNLLGHC[CAM]R	667.98	3	y6	18.1426	755.398	1	y	6	154158	132720	129652	119337	88468	118641	109252	90478.9	112701	181473	109703	103387	83399.2	77768.3	93130.5	73736.8	82761.2	47663	70132.6	66869.2	62198.7	78123.2	63520.2	49494.4	93136.1	113256	64455.3	48129.1	23576.9	17414.5	112483	127538	159495	111900	111906	135652
tr|M0YS73|M0YS73_HORVD	EYVAQQTC[CAM]GVSIAGSPVSTEPGDTPKDR	983.801	3	y10	12.7382	1115.53	1	y	10	127565	80804.6	115323	85265.8	65629.1	64584	78013.3	46725	79403	133824	61948.2	65156.4	90063.9	62172.3	73898.1	67876	71492.3	38901.3	65117.5	54855.1	54664.9	100960	64767.8	50044.8	51278.8	71138.5	38220.4	36378.1	632.552	14841	82192	164467	168316	102321	137195	140558
tr|M0YS73|M0YS73_HORVD	EYVAQQTC[CAM]GVSIAGSPVSTEPGDTPKDR	983.801	3	y25	12.7382	1279.61	2	y	25	108926	81989.9	114538	80535.2	69219.6	74869.4	79541.4	45713	81079.3	132274	64343.3	68599.2	79459.2	56739.6	72280.8	65286	74616.6	40102.8	60675.5	54687.4	59793.4	88326.1	61661.5	50381.3	55144.1	66119	34455.6	30822.2	685.377	10520	75063.4	149520	145625	84114.1	121189	131469
tr|M0YS73|M0YS73_HORVD	EYVAQQTC[CAM]GVSIAGSPVSTEPGDTPKDR	983.801	3	y13	12.7382	1398.69	1	y	13	365900	234642	335427	257970	199375	202291	241483	125615	245186	397467	193203	191143	237311	181759	210849	192641	221314	108988	171345	168017	175594	280040	198351	135497	148611	187249	93831.1	84794.8	1417.94	23120.1	224619	488020	461345	277552	397919	415799
tr|M0YS73|M0YS73_HORVD	EYVAQQTC[CAM]GVSIAGSPVSTEPGDTPKDR	983.801	3	y24	12.7382	1244.09	2	y	24	63847.8	41909.6	62295.5	44523.9	36400	38124.1	42936.7	26532.9	43169.8	72568.6	34830.9	36727.4	43875	36411.8	41536	37867.3	41226.7	22787.5	35244.2	30425.9	33495.3	50090.4	38020.8	28537.9	29045	41264.3	20109	19168.8	293.143	7501.51	41148.6	83175.6	86785.4	47774	71735.3	74957.8
tr|M0YS73|M0YS73_HORVD	EYVAQQTC[CAM]GVSIAGSPVSTEPGDTPKDR	983.801	3	y23	12.7382	1180.06	2	y	23	99370	61222	96213.7	70259.2	57301.9	60396.5	69875.2	37517.3	63276.3	104246	51234.2	55695.5	66592.9	53409.6	58910.4	51610.2	55123.2	32561.2	45133.5	50405.6	48541.2	72445.7	53763.3	40811	45173.5	64719.6	29923.3	23874.4	439.645	10958.9	61617.8	126989	126687	74293.6	103525	113526
tr|M0YS73|M0YS73_HORVD	EYVAQQTC[CAM]GVSIAGSPVSTEPGDTPKDR	983.801	3	y21	12.7382	1065.51	2	y	21	70586.4	42934.3	71750.7	50836.3	39726.4	45805.8	50751.6	25068.5	45912.6	75298.6	41198.6	37848.5	54997.8	41249	43853.9	40872.5	44954.2	24473.2	40701.3	35185.6	34543.5	54352.1	37268.4	27006.4	32601.1	49769.1	20467.6	20901.1	609.25	7407.95	44731.6	97891.7	97771.9	53813	82693.8	92568.6
tr|M0YS73|M0YS73_HORVD	EYVAQQTC[CAM]GVSIA	713.338	2	b10	12.446	1136.5	1	b	10	137023	98338.1	113710	70005.1	55476.1	69711.2	73674.1	48810.7	65031.7	99669.8	63931.9	58029.8	78283.4	72448.3	82188.8	67534.4	74094.6	47077.2	53156.4	47193.3	51430.3	60438.2	49033.8	41368	61483.8	73653.3	46115.9	33643.9	4289.22	16524.3	67384.7	83908.8	88649.9	52604.2	69116.8	77585.3
tr|M0YS73|M0YS73_HORVD	EYVAQQTC[CAM]GVSIA	713.338	2	b11	12.446	1223.54	1	b	11	97563.6	65899.9	90047.5	54203.6	43365.7	58932.6	53198.3	35975	54808.7	63097.6	48135.7	43258.1	62540.4	57731	63197.1	53930.2	53727.7	36505.4	43236.7	40456.7	40684.3	48495.2	38442.1	31914.6	45143.4	53000.9	32915.5	22116	3705.32	9470.32	46095	58117	70102.7	43189.3	49242.5	57020.9
tr|M0YS73|M0YS73_HORVD	EYVAQQTC[CAM]GVSIA	713.338	2	b9	12.446	1037.44	1	b	9	108915	69298.7	96434.1	50155.6	41855.1	61607.9	56087.7	40020	63224.1	77869.5	53435.1	44883.8	68520.3	55612.1	64033.3	51520.4	52356.9	38318	45445.2	36435.9	39812.3	48607.4	39229.2	29505.9	48683.9	59293.5	32197.8	22522.7	3112.27	11016.1	47199.5	65400.9	76875	43101.1	53529.3	57435.9
tr|M0YS73|M0YS73_HORVD	EYVAQQTC[CAM]GVSIA	713.338	2	b7	12.446	820.384	1	b	7	65725.2	45873.4	55178.4	32230.7	29181.8	33656.2	36291.4	25049.5	33570	42974.2	34131.8	29882.2	44053.9	39967	39898.9	34728.2	40419.3	25537.4	30137.8	32034.7	27157.3	31850.6	26592	20973.4	33828.1	40558.3	26562.9	16958.8	3723	7417.03	31861.3	44099.7	44510.3	27713	29203	32865.4
tr|M0YS73|M0YS73_HORVD	EYVAQQTC[CAM]GVSIA	713.338	2	b8	12.446	980.414	1	b	8	57599.4	41712.8	52272.3	31385.4	23852.7	33783.9	30801.8	19936.5	31150.5	42313.7	29396.5	23722.7	37798.8	33756.9	40182.9	28443.4	32177.5	20854	25034.4	21807.7	19887.1	31362.5	22710	16493.8	26320.9	32711.9	16819	12302	1655.27	6029.91	28484.1	37675	39809.9	21501.4	26243.1	31617.2
tr|M0YS73|M0YS73_HORVD	EYVAQQTC[CAM]GVSIA	713.338	2	y8	12.446	835.398	1	y	8	32072.7	19792.3	22529.3	12047.1	12856.3	14023.7	20914.5	11132.9	14930.9	25891.4	13269.1	8849.1	25037.7	15718.3	17913.4	18425	16222.6	12808.6	12964.3	10236.9	11786	13460.9	10052.8	8734.06	12636.8	16577.6	9224.11	9911.03	1590.13	4787.77	12605.3	20852.6	22262.6	12776.2	13064.8	16205.9
tr|M0YS73|M0YS73_HORVD	EYVAQQTC[CAM]GVSIAGSPVSTEPGDTPK	893.425	3	y11	14.1357	1127.56	1	y	11	165330	179111	190385	162694	121499	118416	184221	100614	167906	210535	140801	157131	101928	118787	115078	92028.5	107571	67716.7	83387.6	86170.1	104697	124045	105593	83033.3	61379.7	88395.1	50395.3	35086.6	0	16877.4	93154.9	163886	217965	126084	192242	183660
tr|M0YS73|M0YS73_HORVD	EYVAQQTC[CAM]GVSIAGSPVSTEPGDTPK	893.425	3	y9	14.1357	931.437	1	y	9	117772	123673	132735	106604	83442	82905	125828	66897	114977	147349	99299	104905	63787.1	82532.1	80316.3	60560.1	73136.8	42320.6	54960.7	55287.5	69934.6	83570.7	67384	50414.6	46022	62694.1	34565.4	29798.2	546.119	13573.7	64889.7	113696	153718	81850.7	131559	136303
tr|M0YS73|M0YS73_HORVD	EYVAQQTC[CAM]GVSIAGSPVSTEPGDTPK	893.425	3	y13	14.1357	1271.61	1	y	13	93196	99343.8	107433	92688.2	65636	63477	101137	56603	98504	117429	85633.3	87589.6	57379.2	64275.9	63746.4	57843	68551	37211.8	64861	47485	51623.5	80051.8	61878.4	43521.9	31679.6	47477.2	23955.4	22022.5	0	9761.68	54406.9	92974.5	114986	69224.7	100576	105401
tr|M0YS73|M0YS73_HORVD	EYVAQQTC[CAM]GVSIAGSPVSTEPGDTPK	893.425	3	y14	14.1357	1342.65	1	y	14	38538.6	40901.1	43914.9	37929	28855.1	28043.8	39796.4	25297.3	35748	46759	29904.1	34485.3	24463.9	28651.7	28820.7	22179.7	25259.7	14292.4	18998	21433.9	22899.6	28490.5	21517.1	17874.4	14449.7	21379.6	11233.8	12742	150.855	6129.57	20825.9	36214.4	48002.4	27478.3	43440.9	41347.5
tr|M0YS73|M0YS73_HORVD	EYVAQQTC[CAM]GVSIAGSPVSTEPGDTPK	893.425	3	b10	14.1357	1136.5	1	b	10	37919	41823.1	41354.5	30558.8	23308.5	27907.8	41855.7	16331.3	30025.1	42469.2	24242.1	31539	18719.4	22402.6	20420.8	14992.4	18239.3	12975.1	16599.7	19287.2	18102.1	23893.2	20620.2	15378.4	11879.2	21220.2	9423.46	9998.64	1444	0	19726	29615.4	47648.5	24872.6	34772.3	42729.5
tr|M0YS73|M0YS73_HORVD	EYVAQQTC[CAM]GVSIAGSPVSTEPGDTPK	893.425	3	y12	14.1357	1214.59	1	y	12	22308.8	24255.2	25309	21201.3	17376	17210.2	24502.7	13661.9	21552.8	28452.7	18419.6	19608.4	11702.9	15829.9	14945.6	12424.2	13305.7	8927.34	10184.4	11074.5	12628.6	15918.4	13992.2	10515.3	8092.44	15262.6	5233.23	6690.43	407.955	4080.21	15333.8	23583.7	32079	18703.8	26753.3	27154.4
tr|M0YS73|M0YS73_HORVD	EYVAQQTC[CAM]GVSIAG	741.848	2	b10	12.7417	1136.5	1	b	10	77244.9	59737.8	69133.2	54306.3	30903.7	40471.6	35056.7	21413.4	50867.6	53663.9	37284.2	41620.5	42995.6	24289.4	54624.5	47903	36206.7	24413.3	29011.5	33382.8	27248.4	52767.2	27717.1	25203.9	25341.2	38807.6	30563	24096.7	6443.34	11779	31691.6	67970.1	84550.3	37348.1	55307.3	70413.7
tr|M0YS73|M0YS73_HORVD	EYVAQQTC[CAM]GVSIAG	741.848	2	b9	12.7417	1037.44	1	b	9	89605.9	66121.5	84290.3	59583.6	41151.7	52878.6	49544.3	31018.7	64406.5	70660.7	53931.6	55150.3	57886.6	38542.3	64972.1	57780.2	46916.7	31022.9	40830.7	39305.7	43061	63823.6	44645.6	35416	47047.4	43736.5	41985.9	30703.1	5115.85	11628.2	47004.8	96350.1	100248	60795.5	85118.6	88530.5
tr|M0YS73|M0YS73_HORVD	EYVAQQTC[CAM]GVSIAG	741.848	2	b7	12.7417	820.384	1	b	7	51122.8	36619.5	46180.9	32383.4	21259	31563.5	27315.8	16872.9	31528.3	51094.3	28129.2	26754.8	27084.9	21905.2	37606.7	28313.6	18862.8	13003.2	22013.7	20638.6	16702.4	30285.6	16633.1	15327.4	25077.9	33486.5	22856.1	19953.3	2842.42	8603.71	31081	52418.2	54456.8	30828.4	36806.6	41209.5
tr|M0YS73|M0YS73_HORVD	EYVAQQTC[CAM]GVSIAG	741.848	2	b11	12.7417	1223.54	1	b	11	68442.2	52210.7	62409.6	47488.7	26582	41532.5	32695.3	20833.8	43809	43807.7	28568.9	40074.3	35107.8	25494.1	47558.6	42835.2	30706.1	20461.9	25378.2	31812.4	26764.2	46590.7	25197	21985.3	39007.6	24693.6	27023.8	21785.5	2673.95	7251.82	31458.6	64599.1	77130.6	35789.1	49512.8	64759
tr|M0YS73|M0YS73_HORVD	EYVAQQTC[CAM]GVSIAG	741.848	2	b8	12.7417	980.414	1	b	8	55080.2	41995.4	53897.5	35394	15797.6	22469	20532.8	10168.4	35366.9	33111.2	23490.8	29780.4	20372.2	13868.8	34399.9	33017	19767.8	16262.2	12343.6	15787	13422.9	31758.5	16754.5	13927.8	24831.2	20100.5	16231.9	15115.3	2190.39	3815.24	17900.3	35690.7	45903.9	24531.8	32505.9	38669.7
tr|M0YS73|M0YS73_HORVD	EYVAQQTC[CAM]GVSIAG	741.848	2	b12	12.7417	1336.62	1	b	12	6645.29	4739.25	5450.9	3836.74	2744.44	3102.23	3011.12	1504.08	3661.34	4655.51	5145.53	5392.98	0	1767.76	4383.36	3089.49	3254.69	1906.81	2203.5	4425.35	2709.95	5608.22	2285.74	2007.98	3201.88	2696.28	2855.7	1841.42	541.493	653.063	2959.05	4758.63	5869.5	0	5724.23	6196.07
tr|M0YS73|M0YS73_HORVD	EYVAQQTC[CAM]GVSI	677.819	2	b10	14.8195	1136.5	1	b	10	15679.8	1483.51	2446.77	0	0	2646.62	0	0	10113.5	0	0	438.943	28920	26044	24732.5	21804.7	21500.4	18681.8	576.136	641.564	13290.7	13381.7	9228.99	8310.69	1312.76	1114.01	342.52	0	1789.16	797.501	0	568.283	0	9128.27	0	12030.6
tr|M0YS73|M0YS73_HORVD	EYVAQQTC[CAM]GVSI	677.819	2	b9	14.8195	1037.44	1	b	9	0	1520.89	2249.67	0	1320.66	2681.04	618.392	606.635	0	70981.3	1137.16	2685.05	35720.7	36653.8	37781.8	26426.4	29368.7	0	1859.44	0	21574.1	23420.7	17649.8	16544.1	11227.5	4354.66	1712.75	2515.44	113.651	3471.33	448.387	2289.93	0	23674	49884.2	0
tr|M0YS73|M0YS73_HORVD	EYVAQQTC[CAM]GVSI	677.819	2	b6	14.8195	719.336	1	b	6	0	2367.87	11119.7	1122.86	7806.66	8454.88	0	703.843	0	11447.8	0	0	11155.6	10714.8	8874.98	6443.81	8222.12	6437.18	1894.48	2041.95	0	5129.88	0	3366.26	809.336	0	2582.92	0	358.36	3689.49	218.221	1538.69	1579.99	0	5356.73	0
tr|M0YS73|M0YS73_HORVD	EYVAQQTC[CAM]GVSI	677.819	2	y7	14.8195	764.361	1	y	7	3245.4	1590.95	0	1142.75	54490.5	0	946.864	0	4891.44	101974	66746.7	0	6845.49	5542.06	4895.95	4545.58	6920.01	5628.2	35225	34072.9	3507.97	0	0	2186.3	28971	3384.19	995.334	3489.89	0	7911.78	5390.49	0	0	0	0	2335.18
tr|M0YS73|M0YS73_HORVD	EYVAQQTC[CAM]GVSI	677.819	2	b8	14.8195	980.414	1	b	8	0	4938.22	0	7373.03	1579.08	0	9500.54	2051.89	0	0	1487.62	0	21806.1	21105.2	22324.2	14610.3	16309.3	0	1258.4	1625.25	12250.7	14152.7	8859.53	10146.4	0	0	443.782	4703.23	341.188	3054.43	693.732	0	1222.17	17310.3	0	0
tr|M0YS73|M0YS73_HORVD	EYVAQQTC[CAM]GVSI	677.819	2	b7	14.8195	820.384	1	b	7	1487.23	0	2172.16	1296.88	1299.95	5892.18	2406.31	1335.86	2633.06	9579.73	785.689	1666.66	7654.19	6240.23	7736.1	6838	5360.7	2661.25	413.375	824.254	4014.24	4954.76	0	0	4754.31	4703.57	741.1	6836.89	837.175	8641.07	0	2176.23	3758.96	0	3278.53	4272.72
tr|M0YS73|M0YS73_HORVD	EYVAQQTC[CAM]GVSIAGSPVS	926.941	2	b10	14.0983	1136.5	1	b	10	465.952	8478.46	13742.4	2918.8	413.058	0	0	535.496	1109.1	1232.07	0	2928.96	0	10975	13929.1	14459.6	8215.02	0	1303.24	325.921	0	1598.99	6556.27	1127.51	399.349	7268.98	4819.13	971.528	248.747	10847.8	1200.01	0	336.267	1050.52	1471.39	738.441
tr|M0YS73|M0YS73_HORVD	EYVAQQTC[CAM]GVSIAGSPVS	926.941	2	b13	14.0983	1407.66	1	b	13	593.924	618.405	1987.91	1872.42	0	710.765	389.225	626.288	487.272	0	1338.38	537.853	164.916	352.925	1283.09	275.748	856.358	82.5409	667.787	176.785	165.834	690.541	183.46	104.719	1233.85	1848.96	1019.55	253.776	0	362.728	0	0	227.55	96.7347	1036.76	386.284
tr|M0YS73|M0YS73_HORVD	EYVAQQTC[CAM]GVSIAGSPVS	926.941	2	b15	14.0983	1551.71	1	b	15	8898.82	110.489	0	1961	103.376	0	4441.43	2892.19	5028.95	10415	1318.56	316.725	2451.78	501.879	249.464	526.616	0	470.28	3509.61	1937.84	0	630.016	0	0	3688.87	31608.5	16164.2	0	4010.83	272.238	600.377	1884.21	1063.37	0	1354.84	6535.75
tr|M0YS73|M0YS73_HORVD	EYVAQQTC[CAM]GVSIAGSPVS	926.941	2	b8	14.0983	980.414	1	b	8	2839.2	0	4118.93	464.061	413.613	538.889	848.028	2366.45	1259.28	2161.12	438.803	684.188	1159.76	255.571	0	597.436	387.873	0	641.135	827.787	0	271.722	132.089	279.217	1902.68	2664.54	1302.59	160.067	408.134	504.011	366.381	666.765	415.219	407.765	148.839	1160.42
tr|M0YS73|M0YS73_HORVD	EYVAQQTC[CAM]GVSIAGSPVS	926.941	2	b12	14.0983	1336.62	1	b	12	1486.18	496.588	2491.2	1233.52	165.413	341.342	137.339	305.84	561.443	1659.81	998.689	0	1642.36	377.223	591.827	398.641	185.515	416.247	0	556.929	601.154	3389.23	529.238	0	0	902.705	941.918	178.818	271.181	530.181	1620.41	816.562	2481.32	201.036	1854.54	1804.2
tr|M0YS73|M0YS73_HORVD	EYVAQQTC[CAM]GVSIAGSPVS	926.941	2	b11	14.0983	1223.54	1	b	11	0	314.955	2990.22	302.41	1666.84	2411.03	142.331	420.067	1197.82	2980.19	446.491	306.334	460.247	585.095	826.708	1244.9	533.59	774.449	0	472.314	335.935	267.986	271.674	295.568	0	1421.39	1620.5	0	135.845	229.28	0	249.786	0	560.209	744.01	3433.71
sp|P06471|HOR3_HORVU	AIVYSIVLQEQS	675.369	2	b7	19.7737	746.445	1	b	7	187517	161826	117339	144010	100892	143118	107281	88013.5	117645	104867	80239.9	106755	94271.6	64839.8	68321.9	98010.2	81751.3	49095.1	48833.2	39823	49962.9	47467.9	39315.1	27776.5	148428	159131	103503	67072.2	42022.3	1680.61	122854	120370	145399	105028	100664	112485
sp|P06471|HOR3_HORVU	AIVYSIVLQEQS	675.369	2	y6	19.7737	703.362	1	y	6	125182	123963	74590.1	103616	64800.3	107887	80065.8	73951.7	85598.6	69994.9	64709.4	75969.6	59391.2	48215.5	51671.1	62471	64591.5	40028.8	34638.9	21707.9	33657	34184.5	27975.7	18544.6	101391	129672	72480.8	57061.3	25563.7	3808.95	88013.7	86869.7	101709	78329.5	74557	73187.9
sp|P06471|HOR3_HORVU	AIVYSIVLQEQS	675.369	2	y8	19.7737	903.478	1	y	8	31464.8	35529.3	31411.5	30158.1	17262.7	26093	24747.7	22540.8	24817.2	23140.1	18026.5	28246	21708.6	17600.4	16194.9	19477.9	17391.5	14087.1	11636.9	12099	11772.7	12213.1	9623.8	8999.22	37168.7	41955.9	28180.6	21431.3	14450.6	2696.72	28810.9	27753.2	32614.4	25009.2	21375.2	30255.1
sp|P06471|HOR3_HORVU	AIVYSIVLQEQS	675.369	2	b10	19.7737	1116.63	1	b	10	23727.8	29739.6	25599.1	25137.2	17952.6	23152.2	16653.6	16583.2	11990.6	18832.8	17424.7	16931.8	14173.2	11368.2	8879.54	13235.2	10827.2	8827.73	6681.23	4394.46	6713.49	7603.75	6468.38	4183.26	25111.8	29071.3	25993.8	13378.5	6531.24	8375.79	22829.7	25145.7	23377.7	18276.7	17229.7	23310.3
sp|P06471|HOR3_HORVU	AIVYSIVLQEQS	675.369	2	y9	19.7737	1066.54	1	y	9	35088.7	51115.7	38478.3	41756.6	29107.4	41830.2	30556.3	33687.6	34569	24991.3	22178.8	28443.2	24734.7	17343.4	15404.5	20332.1	21587.8	19013.6	12107.3	8820.96	9755.54	12194.4	9648.64	7217.92	39575.8	41427.6	30619.6	17244.6	9835.95	25641	36398.7	34697.4	43765.6	32332.6	28956.4	32065.5
sp|P06471|HOR3_HORVU	AIVYSIVLQEQS	675.369	2	b8	19.7737	859.529	1	b	8	53183.4	57200.9	50676.8	44688.8	32754.3	39968.5	32483	31151	34394.1	48058.6	39064.5	38224.8	32660.3	22265.7	19693	28339.2	27461	18516.2	16326.1	13463.8	16963.4	13440.4	11695.8	9194.01	46367.3	44604.7	34371.7	28909.3	16110.8	3689.57	40547.2	38735.9	53867.9	35803.7	39454.3	37609.3
sp|P06471|HOR3_HORVU	AIVYSIVLQEQSLQ	795.94	2	y7	22.2359	845.436	1	y	7	83691.2	77140.8	71993	65787.4	43932.2	62893	37522.8	29023.4	36268	49039.3	32056.5	34917.6	34675.4	30739.4	26409.8	30276.4	31795.1	20070.7	0	10587.2	12694	0	13887	2555.46	57402.7	72384.1	38993.1	39711.9	12005.6	18076.4	34942.5	38253.7	50778.8	28957.7	27978.8	39103.1
sp|P06471|HOR3_HORVU	AIVYSIVLQEQSLQ	795.94	2	y8	22.2359	944.505	1	y	8	56730.1	52888.5	46166.8	40380.7	29698.2	48769.1	28223.2	23798.9	29998.5	39519.3	24757.1	26003.7	30613.6	22114.4	25454.9	33715.6	26667.2	21226.7	26708.1	13402.7	16165.9	873.559	13620.3	516.057	40551.1	52913.2	43275.6	30480	2164.25	26013.5	23382.5	27031.6	34014	21424	19203.7	24641.9
sp|P06471|HOR3_HORVU	AIVYSIVLQEQSLQ	795.94	2	b8	22.2359	859.529	1	b	8	37870.9	35552.8	29299.3	24301.3	18272.2	37296.6	10471.7	12848	13070.9	21257.3	9981.22	10322.4	15915	8357.19	9017.92	14945.3	12126.4	7525.56	3882.7	3390.12	3201.21	115.825	4290.74	275.269	27889.5	35774.2	21346.5	12646.4	3870.85	8149.42	15316.5	15731.9	18150.2	13064.1	11557.8	15554
sp|P06471|HOR3_HORVU	AIVYSIVLQEQSLQ	795.94	2	b9	22.2359	987.587	1	b	9	19707.8	16388.4	12758	11880.8	8416.69	14996.6	6677.96	4747.16	6916.75	10793.8	5698.7	6945.33	5540.56	5321.92	4740.54	7109.92	5703.44	4561.35	2417.01	1472.15	2245.99	2622.15	2724.84	0	17790.5	25971.5	14640.4	8230.03	1127.39	7903.14	10586.9	13569.1	15125.2	7706.36	8297.9	9774.91
sp|P06471|HOR3_HORVU	AIVYSIVLQEQSLQ	795.94	2	b11	22.2359	1244.69	1	b	11	12519.1	12479.9	8574.27	9850.7	9011.23	10385.9	4559.12	4290.85	5936.36	8045.48	3544.69	5732.05	4819.42	4100.19	3220.4	5449.55	4419.14	3247.63	0	1631.7	2458.12	618.091	2051.7	686.97	8010.83	10173.5	8006.57	4596.58	1199.4	4442.78	6163.17	4872.7	6146.42	3159.63	4586.07	4741.91
sp|P06471|HOR3_HORVU	AIVYSIVLQEQSLQ	795.94	2	b12	22.2359	1331.72	1	b	12	15467.4	13772.1	12041.5	10694	8037.82	14251.2	6072.31	4809.08	5710.44	9610.56	5257.99	6125.44	5214.21	4279.99	6596.37	6539.45	6361.83	3586.5	0	1664.89	2032.56	0	2419.46	760.766	11398.3	11895.2	8040.17	7012.45	2918.3	5161.48	8085.2	6996.13	7359.58	5274.25	6553.29	7314.38
sp|P06471|HOR3_HORVU	QPQPQQGQQQQVPQSVFLQPHQIAQLEATTSIALR	981.518	4	y23	24.7413	1274.7	2	y	23	123510	190816	173788	68136.6	43818.8	192676	52717.2	47118.2	134491	182755	111040	110041	53075.2	41804.5	74925.8	109018	97661.1	68507.3	53811.9	41875.4	54702.1	67779.8	51270.3	12406.9	144518	133181	77043.3	31351.3	34915.3	14138.1	80291.5	77783.1	78906.4	59745.7	72323.7	73890.8
sp|P06471|HOR3_HORVU	QPQPQQGQQQQVPQSVFLQPHQIAQLEATTSIALR	981.518	4	b9	24.7413	1020.49	1	b	9	10777.3	0	0	6458.57	3914.06	0	5723.66	4897.13	0	0	0	0	5052.63	3808.53	0	0	0	0	0	0	0	0	0	2089.77	14226.6	13283.7	9268.93	0	3550.23	0	10136	13076.5	12322.7	10387.9	15912.2	11465.9
sp|P06471|HOR3_HORVU	QPQPQQGQQQQVPQSVFLQPHQIAQLEATTSIALR	981.518	4	y19	24.7413	1069.09	2	y	19	19875.2	20290.4	20706.2	9912.91	4749.31	20272.1	8406.35	6614.48	15459	20181.1	11333.8	11315.1	7149.77	6055.86	9017.02	12219.9	10137.4	8071.93	5756.15	4638.77	6524.56	5836.41	5588.08	1028.13	11240.2	14374.9	10030.4	3898.01	5165.09	2168.6	7386.34	7108.21	8311.28	8303.57	7683.24	7488.41
sp|P06471|HOR3_HORVU	QPQPQQGQQQQVPQSVFLQPHQIAQLEATTSIALR	981.518	4	b12	24.7413	1375.67	1	b	12	8807.71	0	0	5028.31	3836.78	0	11588.7	4728.48	0	0	0	0	3712.6	3276.16	0	0	0	0	0	0	0	0	0	1362.23	12311.2	12777.4	7121.45	0	4190.12	0	11017.6	10757	16686	8057.28	11306.4	9785.3
sp|P06471|HOR3_HORVU	QPQPQQGQQQQVPQSVFLQPHQIAQLEATTSIALR	981.518	4	y16	24.7413	1748.97	1	y	16	109727	173564	154547	42148	26124.6	148971	37764.9	32494.1	109574	161101	81248.4	86241.2	39227.2	20471.2	65546.8	94615.2	83509.9	57669.4	48658.2	34541.6	46700.3	50098.5	40320.8	7520.42	79302.4	84750.3	55353.1	26779	29656.5	23166.4	60516.1	63722.9	58891	48929.8	88604.2	74290.2
sp|P06471|HOR3_HORVU	QPQPQQGQQQQVPQSVFLQPHQIAQLEATTSIALR	981.518	4	y11	24.7413	1202.67	1	y	11	35520.4	53645.8	45383.3	12965.4	7677.67	47395.5	10152.2	8691.56	34200.7	49381.3	24589.7	27116.4	14003.2	8032.11	22610.1	30546.5	27088.4	17944.8	13800.8	10802.5	14320.6	14379.5	12300.1	2981.65	28664.3	34613.3	16990.3	14282.6	12395.6	11204.2	14594.3	15239.5	15088.9	12979.5	18496.4	15238.7
sp|P06471|HOR3_HORVU	AIVYSIVLQEQSLQL	852.483	2	y8	28.7971	958.52	1	y	8	8532.47	6626.05	7875.39	6277.87	4271.85	7486.99	4574.25	638.328	0	7116.65	3902.9	4266.06	7064.53	769.983	651.817	0	4914.79	3273.44	502.857	0	655.889	989.34	3730.27	1294	11413	8324.54	4496.44	1132.65	2104.64	2094.17	6925.03	6342.9	12270.8	7877.39	0	7200.89
sp|P06471|HOR3_HORVU	AIVYSIVLQEQSLQL	852.483	2	b10	28.7971	1116.63	1	b	10	8765.6	4499.93	3680.39	3362.27	1053.02	2200.12	2553.38	476.254	1852.52	2977.67	2447.93	1655.37	8415.86	1999.21	1919.94	0	3019.95	1798.49	2363.33	928.068	1135.68	3445.78	977.331	1396.55	7322.14	5692.43	4590.03	0	12663.1	20863	3190.01	4533.89	3089.01	2489.96	516.45	3765.41
sp|P06471|HOR3_HORVU	AIVYSIVLQEQSLQL	852.483	2	b9	28.7971	987.587	1	b	9	9919.99	8005.2	7491.32	5591.34	3658.92	11956.7	5655.51	0	918.558	10937.3	4460.07	3459.82	6373.48	0	3568.74	1860.55	6012.91	4207.75	1182.69	549.183	540.897	672.3	3386.26	1756.88	6261.27	6688.56	2488.08	704.597	2083.15	365.184	3903.41	6940.16	3753.03	3710.39	1100.67	5557.96
sp|P06471|HOR3_HORVU	AIVYSIVLQEQSLQL	852.483	2	y12	28.7971	1420.77	1	y	12	1296.35	2266.64	976.577	737.08	468.569	465.396	1348.51	0	214.388	163.872	1202.89	154.824	187.073	391.035	215.796	222.977	1188.7	353.316	218.006	107.589	394.556	457.391	488.732	658.499	548.898	1185.14	1685.87	2093.43	446.303	641.284	358.724	1655.68	1092.28	130.925	0	730.241
sp|P06471|HOR3_HORVU	AIVYSIVLQEQSLQL	852.483	2	b12	28.7971	1331.72	1	b	12	5469.67	2106.3	2629.15	1975.06	1701.17	2203.87	1998.48	128.48	0	3349.86	2308.8	1396.09	4563.01	0	1886.41	985.871	2496.48	1654.19	294.351	590.21	0	169.534	1377.4	0	3478.55	0	659.688	1844.06	4008.02	5003.82	3096.01	0	5029.16	2399.8	782.15	3939.34
sp|P06471|HOR3_HORVU	AIVYSIVLQEQSLQL	852.483	2	y10	28.7971	1170.67	1	y	10	1010.69	617.879	703.632	501.959	371.661	288.332	90.829	448.548	0	296.53	282.753	739.166	722.943	878.343	1081.84	814.744	359.871	473.879	0	0	712.875	713.17	743.977	0	1714.11	631.317	0	495.085	1061.69	798.653	0	0	0	1147.39	225.735	1177.06
sp|P06471|HOR3_HORVU	AIVYSIVLQEQSL	731.911	2	y7	24.6109	816.446	1	y	7	34526.1	3685.58	3229.59	0	0	18372.7	0	13918.7	0	0	0	0	0	35597.6	6057.42	0	0	0	0	15606.3	19776.6	0	0	0	0	0	0	0	0	0	0	0	0	0	3915.77	0
sp|P06471|HOR3_HORVU	AIVYSIVLQEQSL	731.911	2	b10	24.6109	1116.63	1	b	10	4466.44	10983.9	1414.51	7713.01	2667.41	3973.81	8440.69	338.008	2658.51	13576.3	2172.15	1820.66	2733.72	0	407.397	431.235	2528.82	1858.69	1452.42	0	0	2021.95	1188.28	86.8163	3638.7	10991.2	5363.17	4255.02	3655.7	2227.16	9241.66	8825.79	3606.24	756.108	8895.6	3850.35
sp|P06471|HOR3_HORVU	AIVYSIVLQEQSL	731.911	2	y10	24.6109	1179.63	1	y	10	8637.96	287.98	3818	0	3379.75	6684.29	904.653	0	3118.09	0	0	0	0	0	3208.01	0	0	0	0	0	4176.18	2268.17	881.012	1879.49	6355.11	0	0	0	295.395	1474.22	0	505	4147.47	1766.51	0	0
sp|P06471|HOR3_HORVU	AIVYSIVLQEQSL	731.911	2	b9	24.6109	987.587	1	b	9	3974.84	5772.81	0	4617.26	1377.74	3766.79	4896.61	3684.69	2192.6	5889.91	1001.18	2243.88	1320.35	12216.1	596.569	315.787	1724.28	1304.29	933.937	6725.46	136.456	919.166	735.684	155.607	3712.57	6844.07	2776.93	2314.25	2223.37	860.114	5618.4	4767.69	1776.16	0	4523.38	1044.13
sp|P06471|HOR3_HORVU	AIVYSIVLQEQSL	731.911	2	b8	24.6109	859.529	1	b	8	7957.38	11832.5	0	8017.54	4293.33	7772.41	8933.95	2173.63	4152.16	14363.4	3030.47	4311.91	3903.98	5084.52	172.676	1612.18	4284.26	2818.77	1801.04	2930.69	0	2999.28	2086.05	208.915	5810.38	19081.5	12843.5	8092.41	6813.69	0	10847.2	11978.6	5107.56	323.407	8617.44	4688.64
sp|P06471|HOR3_HORVU	AIVYSIVLQEQSL	731.911	2	y9	24.6109	1016.56	1	y	9	5749.86	1879.82	1158.98	413.469	5057.53	6772.61	0	1955.26	2794.44	1612.17	1618.56	0	1647.23	0	772.716	600.831	5365.04	1575.46	215.703	0	1127.45	0	1098.1	308.924	3357.46	4005.41	1869.1	1190.94	2088.85	1663.82	0	0	3095.72	709.171	1294.33	4383.73
sp|P06471|HOR3_HORVU	QQVGQC[CAM]SFQQPQPQQGQQQQVPQSVFLQPHQIAQLEATTSIALR	997.907	5	y23	26.4067	1274.7	2	y	23	208208	0	176130	68136.6	123613	201067	1358.06	47118.2	139159	182810	115390	112382	117291	82456	44080.8	109019	102442	71071	61036.1	17317.6	59703.9	71494.6	53685.4	12722.4	119147	95256.8	0	26788.5	2440.52	14138.1	80291.5	100072	5524.91	4533.29	92189.6	73890.8
sp|P06471|HOR3_HORVU	QQVGQC[CAM]SFQQPQPQQGQQQQVPQSVFLQPHQIAQLEATTSIALR	997.907	5	b10	26.4067	1191.52	1	b	10	0	0	0	0	0	0	0	0	0	0	0	0	0	0	0	0	0	0	0	0	0	0	0	0	0	0	646.18	0	1029.15	0	0	0	1295.11	482.415	0	0
sp|P06471|HOR3_HORVU	QQVGQC[CAM]SFQQPQPQQGQQQQVPQSVFLQPHQIAQLEATTSIALR	997.907	5	y16	26.4067	1748.97	1	y	16	192828	6316.21	158357	42148	106561	155673	2995.49	33274.5	112577	164008	86810.3	89077.4	101417	69847.2	40830.1	98497.8	92089.6	62227.3	53062.6	11268.3	48147.5	53767.4	44328.8	7520.42	96149.1	90284.6	2767.65	29064.8	0	23166.4	60516.1	94696.3	10879.8	8280.2	77818.7	74290.2
sp|P06471|HOR3_HORVU	QQVGQC[CAM]SFQQPQPQQGQQQQVPQSVFLQPHQIAQLEATTSIALR	997.907	5	y34	26.4067	1265.67	3	y	34	11193.3	748.586	0	0	0	0	613.258	0	0	0	0	5506.25	4099.75	4793.1	0	0	4599.92	0	6013.21	809.833	0	0	0	0	0	4698.77	1694.31	0	0	0	3436.1	0	0	0	5778.19	0
sp|P06471|HOR3_HORVU	QQVGQC[CAM]SFQQPQPQQGQQQQVPQSVFLQPHQIAQLEATTSIALR	997.907	5	y11	26.4067	1202.67	1	y	11	52538.1	905.624	45382.9	12965.4	33125.8	49127.4	0	8691.56	34200.1	49043.3	24589.7	27116.4	28517.4	19865	8308.13	30465.5	27005.1	19393.4	16627.1	3105.13	14341	14602.5	13381	3056.12	32222	33772.6	1390.57	9759.46	3577.25	11204.2	14594.3	26972.7	3363.36	2521.3	20989.4	14388.3
sp|P06471|HOR3_HORVU	QQVGQC[CAM]SFQQPQPQQGQQQQVPQSVFLQPHQIAQLEATTSIALR	997.907	5	b21	26.4067	1219.57	2	b	21	0	263.866	0	0	0	0	768.05	0	0	0	0	0	0	0	1265.72	0	0	0	0	664.735	0	0	0	561.575	0	0	1114.61	0	1824.51	0	0	0	762.705	501.313	0	0
sp|Q43492|BSZ7_HORVU	LASAISSDPESAATNVAFSPVSLHVALSLVAAGAR	845.702	4	y19	29.49	933.533	2	y	19	756577	718344	634841	610812	473419	790652	368496	329728	407946	638945	367026	441871	571279	522381	547827	545449	591032	411349	331237	235944	251568	384466	267377	200845	467441	504587	265203	138688	0	17723.2	355773	403874	466479	355408	416876	442678
sp|Q43492|BSZ7_HORVU	LASAISSDPESAATNVAFSPVSLHVALSLVAAGAR	845.702	4	y10	29.49	928.557	1	y	10	1.89047e+06	1.65429e+06	1.4232e+06	1.3308e+06	948963	1.67056e+06	688247	433644	776314	1.567e+06	723729	894435	1.23588e+06	1.06989e+06	1.14607e+06	1.13775e+06	1.30683e+06	826225	585793	378841	434656	795412	510838	259294	974744	1.24093e+06	588517	349440	7696.99	119201	727687	760923	964878	648794	751546	892220
sp|Q43492|BSZ7_HORVU	LASAISSDPESAATNVAFSPVSLHVALSLVAAGAR	845.702	4	y18	29.49	898.015	2	y	18	428817	456463	371065	386298	284305	459203	217888	177071	242257	423049	232141	278491	353925	305405	320114	305243	371413	240100	185530	127070	145145	230636	158780	111458	300120	314940	174172	93383.8	1448.55	28463	219558	226798	282771	202832	227351	261544
sp|Q43492|BSZ7_HORVU	LASAISSDPESAATNVAFSPVSLHVALSLVAAGAR	845.702	4	y12	29.49	1164.68	1	y	12	1.01561e+06	946877	736841	797621	521706	1.04235e+06	395717	335249	437918	863889	412930	534710	671100	618003	643101	616514	685277	489429	334187	226359	260747	445571	298503	188235	553511	641403	304802	187293	28231.6	56902.9	419007	468775	543965	380587	462441	513488
sp|Q43492|BSZ7_HORVU	LASAISSDPESAATNVAFSPVSLHVALSLVAAGAR	845.702	4	y11	29.49	1027.63	1	y	11	1.01392e+06	885171	732287	709309	502583	903829	402295	308230	429240	848311	386873	491904	655271	566474	587893	614028	665971	433976	330566	216844	246184	438832	294015	180580	550793	673799	308652	178356	0	55290.6	404992	424024	528197	359320	435078	456470
sp|Q43492|BSZ7_HORVU	LASAISSDPESAATNVAFSPVSLHVALSLVAAGAR	845.702	4	y22	29.49	1090.61	2	y	22	109893	119522	102753	106514	73078.3	133281	54109.1	45933.4	57120.6	111314	58580.9	69155.9	97057.3	77422.2	84001.6	80759	85086.7	62606.1	46120.7	31167.5	35227.4	65739.5	41661.8	26542.4	76971.1	85411.8	40933.6	26982.9	1090.16	9103.27	54495.4	58890.8	70616.8	48217.3	62991.9	67728.9
sp|Q43492|BSZ7_HORVU	TKAPEAASQVNSWVK	539.286	3	y5	10.6153	633.336	1	y	5	497854	367783	280943	327851	240040	410372	286433	191497	237809	516381	190785	351162	262216	226936	244632	261181	306223	170329	156382	157902	172193	240072	167493	123389	291514	356251	183284	120773	45810.3	45734.8	285428	273877	388509	231686	320929	351721
sp|Q43492|BSZ7_HORVU	TKAPEAASQVNSWVK	539.286	3	y6	10.6153	732.404	1	y	6	416699	318867	251023	280778	195353	370658	240626	194066	223265	452754	200476	308521	204939	205919	227932	225446	276453	141351	142840	136642	156434	200229	142380	110556	254459	309639	144833	105199	41194.7	40995.4	234176	262073	376772	232104	259307	293748
sp|Q43492|BSZ7_HORVU	TKAPEAASQVNSWVK	539.286	3	b6	10.6153	598.32	1	b	6	213186	164536	129861	138691	99004.3	205699	120443	90980.1	110342	243793	99212	154601	106237	104517	110102	108301	142337	69087.4	71400.6	61153.8	71671.4	100138	62190.9	48621.2	121523	160435	79412.4	68451.9	29130.8	42011.6	119762	122448	187538	112521	133158	145009
sp|Q43492|BSZ7_HORVU	TKAPEAASQVNSWVK	539.286	3	b7	10.6153	669.357	1	b	7	186586	145307	114775	135650	89671.7	182563	108128	82237	106077	215476	87213	140048	102085	98999.6	102762	100617	134581	65785.3	66003.3	59056.9	67154.6	86045.1	63076.4	46019.9	117702	140546	67774.2	50225.8	22814.1	22363.6	116020	117102	166095	103913	125342	136373
sp|Q43492|BSZ7_HORVU	TKAPEAASQVNSWVK	539.286	3	y8	10.6153	947.495	1	y	8	151005	117875	90858	102396	73855.1	148447	88714	70986.9	82050.8	181063	71475.2	113158	76488	76089.6	84852.5	80927.1	109997	56216.7	50217.7	48846	53834.5	72198.1	50520.5	36532.5	91843.3	111628	49528.2	35121.3	13593.9	14767.7	90346.9	96750.6	138780	82032.1	104374	111747
sp|Q43492|BSZ7_HORVU	TKAPEAASQVNSWVK	539.286	3	y7	10.6153	860.462	1	y	7	136572	118577	99789.1	93319	73027.7	130605	76014.1	69700.4	78359.6	178845	69966	97780.9	83633.5	72629.3	86219.8	84497.5	109059	48938.4	54441.2	44567	49159.1	64162.4	52194.4	39018.4	82045.2	102167	51425.8	27747	15242.4	18631.5	88697.1	100199	135171	80617.6	97120.2	104816
sp|Q43492|BSZ7_HORVU	IAFANGVFVDASLSLKPSFQELAVC[CAM]NYK	1030.2	3	y21	27.3711	1208.61	2	y	21	105410	114749	52775.9	70936.2	60482	146123	51252.8	34677.7	42042.1	101871	33178.8	66655.2	41557.7	49654.8	56357.1	57218.2	59226.6	44234.6	24270	11257.6	23062.1	42602	24748.1	14836.8	75729.6	70933.6	33410.7	19769.5	14636	2032.79	61810.3	49525.8	73183.2	52202.6	56065.6	70353.5
sp|Q43492|BSZ7_HORVU	IAFANGVFVDASLSLKPSFQELAVC[CAM]NYK	1030.2	3	y12	27.3711	1455.69	1	y	12	346571	294332	188074	324313	167876	376035	150158	117327	198613	287782	162236	241512	156314	149122	200954	202701	256300	144205	108467	59278.5	59346.8	191175	78818.3	46163.4	250730	234995	81911.9	76045.1	53319.9	4904.56	179685	185483	251667	147421	198997	187535
sp|Q43492|BSZ7_HORVU	IAFANGVFVDASLSLKPSFQELAVC[CAM]NYK	1030.2	3	y23	27.3711	1286.66	2	y	23	45470.7	39141.7	35236	29684.5	18684.7	75437.7	17619	11896.5	23710.8	33503	21037.4	21173.1	16819.8	17110.8	15292.6	24250	25892.8	12903	11879.8	8363.6	9217.87	18853.4	9570.3	5283.4	33653.9	34834	11811.9	9594.3	10232.1	0	21118.4	17378	27028.5	19096	19328.6	25679.5
sp|Q43492|BSZ7_HORVU	IAFANGVFVDASLSLKPSFQELAVC[CAM]NYK	1030.2	3	y24	27.3711	1343.68	2	y	24	36040.8	23089.9	16175.3	23654.9	12407.6	31621.2	9572.03	6659.99	12283.9	20920.4	7438.95	13875	10911.7	10048.8	8976.37	14399.4	23505.6	7898.75	0	3150.93	4904.24	10269.8	7528.13	3114.16	17226.6	25205.2	4092.06	4306.01	0	1799.93	14364.2	14413.2	15052.8	11603.4	16067.5	15263.9
sp|Q43492|BSZ7_HORVU	IAFANGVFVDASLSLKPSFQELAVC[CAM]NYK	1030.2	3	y19	27.3711	1085.55	2	y	19	76220.9	39567.4	37411.3	33196.9	28416.9	65074.1	24630.2	15777.8	24404.7	47603.1	14722.1	33414.6	23583.7	23837.3	23912.7	24511.6	32438	17984.8	13003.9	8731.77	7732.69	23620.1	15994.7	7211.71	38870.3	46850.3	21825.1	11385.4	14412.7	3301.12	28560.3	23878.6	35400.1	22626.9	26863.9	30900.5
sp|Q43492|BSZ7_HORVU	IAFANGVFVDASLSLKPSFQELAVC[CAM]NYK	1030.2	3	y25	27.3711	1379.2	2	y	25	16775.2	12930.5	8909.89	12768.6	8335.89	17079.8	6808.49	0	0	12021.4	4587.71	8766.18	9675.24	0	0	0	9805.83	5111.77	0	0	3163.41	7528.01	2986.76	0	8682.12	12993.6	0	2740.15	3150.57	72.0112	7643.59	6908.87	8034.39	7629.18	6765.44	8813.8
sp|Q43492|BSZ7_HORVU	GATRDQLVAVLGGGGAGEAEALQSLAEQVVQFVLADASINSGPR	1081.31	4	y11	42.3692	1100.57	1	y	11	137638	83235.4	149690	112630	33683.1	151148	29971.2	18152.1	33678.6	109705	61396.7	44134.4	132846	100343	88856.8	95322.4	117753	70836	35538.2	13515.5	17802.6	58623.4	15178.5	14449.4	51458.4	82425.1	30545.1	25915.3	27872.3	0	28567.2	80672.8	54361.6	27706.3	61022.9	50415.3
sp|Q43492|BSZ7_HORVU	GATRDQLVAVLGGGGAGEAEALQSLAEQVVQFVLADASINSGPR	1081.31	4	b11	42.3692	1124.64	1	b	11	69658.7	44362.6	75598.7	52261.3	17665.5	73842.1	12900.6	9080.89	17680.3	57528.2	30292.4	21406.9	68104	49471	46474.5	48548.9	58528.8	37007.7	17899.1	6550.98	9111.71	29957.1	6968.42	7178.26	25886	44433.9	14491.3	12252.5	17769.1	0	12480.8	39702.4	26313.4	12651.8	28750	26549.3
sp|Q43492|BSZ7_HORVU	GATRDQLVAVLGGGGAGEAEALQSLAEQVVQFVLADASINSGPR	1081.31	4	y12	42.3692	1199.64	1	y	12	61320.6	37031	67307.7	46452.7	17186.5	70782.4	12071.9	8328.85	14605.8	46623.4	25472.9	17926.3	61894.2	46001.7	43145	46856.2	53997.3	34720.9	16330.9	6003.74	7841.5	26720	6392.17	6389.47	25353.8	45475.9	12546.5	11281.8	16734.6	29.9205	13152.7	38960.2	26206.6	12745.9	28434.5	24658.7
sp|Q43492|BSZ7_HORVU	GATRDQLVAVLGGGGAGEAEALQSLAEQVVQFVLADASINSGPR	1081.31	4	y13	42.3692	1346.71	1	y	13	52046	30993.7	51353	42519.6	11276.7	54109.4	10200.2	7258.32	12880.4	40469.9	21274.9	15452.9	48282.9	34942.8	34355.5	35335.9	44122.9	26645.2	10882.8	5574.9	6018.76	18780	4958.72	4787.02	16565.3	32640.6	11093.3	8563.89	11375.4	0	9798.45	27762.7	18406.7	9624.99	23669.2	18534.7
sp|Q43492|BSZ7_HORVU	GATRDQLVAVLGGGGAGEAEALQSLAEQVVQFVLADASINSGPR	1081.31	4	b16	42.3692	1423.77	1	b	16	12996.1	9675.05	14957.5	11315.4	3487.7	16788.8	2861.77	1931.2	3554.55	10800.6	6586.06	3909.97	14010.5	11426.3	9369.25	10917.1	14057.2	8269.99	3958.1	1830.07	1582.56	5950.27	1399.74	1218.67	4144.83	8906.82	2919.86	3086.46	3240.72	63.9138	2961.01	8238.02	6262.15	3351.93	6226.53	5572.89
sp|Q43492|BSZ7_HORVU	GATRDQLVAVLGGGGAGEAEALQSLAEQVVQFVLADASINSGPR	1081.31	4	b29	42.3692	1375.21	2	b	29	0	0	0	0	0	0	0	0	0	0	0	0	0	0	0	0	0	0	0	0	0	0	0	0	0	0	0	0	0	38.0768	0	0	0	0	0	0
sp|Q43492|BSZ7_HORVU	FGLRLASAISSDPESAATNVAFSPVSLHVALSLVAAGAR	964.021	4	b12	30.6838	1218.65	1	b	12	30608.6	739.144	55858.3	33128.5	0	42230.8	4641.72	0	128.091	2346.75	5713.62	841.572	27355.7	5626.46	0	8615.95	14291.4	4555.39	0	823.638	1178.18	2026.98	0	62.7298	102347	235637	81052.9	70397.1	31106.4	35063.9	92672	95888.3	79623.7	59740.4	82121.1	53195
sp|Q43492|BSZ7_HORVU	FGLRLASAISSDPESAATNVAFSPVSLHVALSLVAAGAR	964.021	4	y16	30.6838	1560.92	1	y	16	7920.5	1738.14	15173.7	7516.85	1922.52	10154.1	1287.96	892.137	1493.03	117.554	978.478	578.313	3987.39	1099.24	1203.72	1923.05	2048.49	1521.41	689.064	632.591	537.664	959.246	547.684	76.1349	24554.6	56238.7	20830.6	19831.1	12667	16667	20083.6	23545.6	20489.8	14194	16251.1	14470.2
sp|Q43492|BSZ7_HORVU	FGLRLASAISSDPESAATNVAFSPVSLHVALSLVAAGAR	964.021	4	y12	30.6838	1164.68	1	y	12	11096.5	3165.88	19743.4	10363.7	4333.34	11647.6	1531.07	2406.51	1768.45	451.318	2246.32	837.418	7517.55	2565.53	3663.66	4003.98	3201.67	1572.16	2982.53	371.474	0	1180.85	998.303	21.8481	32086.5	82570.6	30321	31469.6	20245.4	17631.7	33148.6	29685.6	31010.6	23312.7	25168.4	20026.1
sp|Q43492|BSZ7_HORVU	FGLRLASAISSDPESAATNVAFSPVSLHVALSLVAAGAR	964.021	4	y11	30.6838	1027.63	1	y	11	8145.42	5688.82	15643.8	9101.31	5444.87	12379.6	1504.04	2738.1	2988.51	377.015	1306.32	0	8878.02	2315.42	3027.35	2569.85	3438.1	1345.92	2894.63	147.518	669.26	1201.05	808.484	0	30523.2	74948.9	25849.3	27232.9	16291.5	17629.4	28618.7	33238.7	22522.7	20827.9	25246.1	16789.5
sp|Q43492|BSZ7_HORVU	FGLRLASAISSDPESAATNVAFSPVSLHVALSLVAAGAR	964.021	4	y22	30.6838	1090.61	2	y	22	4688.82	687.382	5827.71	2041.47	731.656	3851.42	1496.34	238.413	0	0	576.638	477.508	3030.78	1467.03	0	673.122	1215.41	288.14	0	182.772	119.748	1091.05	362.571	0	9303.87	21690.1	7352.93	6585.07	3529.62	3172.72	7854.01	8458.78	8850.87	6394.05	7413.82	4352.54
sp|Q43492|BSZ7_HORVU	FGLRLASAISSDPESAATNVAFSPVSLHVALSLVAAGAR	964.021	4	y20	30.6838	983.068	2	y	20	2289.89	0	3300.97	2856.61	711.94	2363.33	0	281.237	221.537	81.0551	566.916	0	0	527.336	788.519	0	1380.2	1042.37	512.834	0	0	574.062	0	0	6136.5	14471.2	6952.98	3719.06	2907.11	2640.92	6237.26	6215.05	4070.89	3862.87	5496.97	3880.23
sp|Q43492|BSZ7_HORVU	GATRDQLVAVLGGGG	685.873	2	b9	16.2315	912.49	1	b	9	67792.9	68817.1	70453	107934	42485.4	106355	26328.7	25631.1	29026.9	66348.8	33785.4	61069.7	48298.5	76140.3	34064	33995.6	99680.5	51341.1	19355.3	40800.2	43857.9	51620.2	17831.1	29847	44037.8	65726.5	33594.6	29852	18107.2	14698.1	32088.3	41318	38339.3	45039.5	42503	53133.8
sp|Q43492|BSZ7_HORVU	GATRDQLVAVLGGGG	685.873	2	b10	16.2315	1011.56	1	b	10	66424	77565.1	68009.1	114008	43919.9	107771	28864.4	25755.1	31086.1	59093.2	34339.2	66322.7	46766.4	78034.1	33650	33269.1	101320	54738.4	15552.4	45374.8	45428	52296.4	20227	32900.4	43763.8	70145	33110.4	25379.5	14285	29037.1	35379.3	45785.4	43258	41850.8	44979.4	54444.4
sp|Q43492|BSZ7_HORVU	GATRDQLVAVLGGGG	685.873	2	b8	16.2315	841.453	1	b	8	40463	43771.2	43613.5	66158.3	28385.2	61891.8	18037.4	16844.4	19711.9	35403.3	20333.2	40281.7	33657.4	48857	21127.6	24082.1	60638.8	33219.2	12912.4	27724.3	28466.8	33884.4	11620.2	20689.2	30426.6	45023.8	21934.1	19496.1	15315.3	81164.5	23741.6	30677.1	27362.1	28964.3	31250.9	36810.3
sp|Q43492|BSZ7_HORVU	GATRDQLVAVLGGGG	685.873	2	b7	16.2315	742.384	1	b	7	27561	27222.1	24636.3	38701.6	14413.4	35761.3	11015.2	9556.68	10608.9	23170.6	16690.9	25280.5	29701.1	27084.5	10086.8	13721.8	34379.7	18963.3	0	15836.4	16058.3	16230.7	5765.63	10588.8	17083.4	21639	17386.5	12700.9	10504.3	46960.7	9660.21	12962.8	12742.4	24538	16122.5	17992.6
sp|Q43492|BSZ7_HORVU	GATRDQLVAVLGGGG	685.873	2	b11	16.2315	1124.64	1	b	11	23832.9	26910.8	24116.7	42053.2	15435.1	36794.4	10047.9	10301.7	15491.6	21059.1	13092.8	24657.3	18574.1	33151.6	12307.3	13035.1	37181.2	24047.9	6507.33	17007.2	16678.5	19619.1	6548.45	13382.7	21421.7	27376.1	17127.9	10899.9	6037.54	0	13079.2	17452.2	14391.5	15090.3	17422.8	20148.7
sp|Q43492|BSZ7_HORVU	GATRDQLVAVLGGGG	685.873	2	b12	16.2315	1181.66	1	b	12	5624.11	6926.89	5138.46	10879.2	4687.92	8993.54	2873.56	2330.97	3464.89	4929.49	3883.96	6777.6	5222.36	7090.29	3779.43	3491.88	9215.89	5503.85	1968.5	4426.09	4080.08	5080.06	2057.83	3197.67	5376.6	7639.18	4141.88	3508.85	4757.88	5534.82	3642.02	6233.07	3164.75	4911.38	4662.21	4200.95
tr|I6TEV2|I6TEV2_HORVU	C[CAM]PAIQTIVHAIVMQQQQ	655.673	3	b14	24.13	781.913	2	b	14	19525.4	17759	12545.7	11177.3	8378.71	15721.9	6519.67	1498.78	8740.16	10232.7	5456.81	9235.15	11174	11957.8	12098.8	10806.2	13695.9	7772.76	6697.26	4572.85	7134.13	7633	5141.12	4345.87	13769.6	16448.7	13372.5	1175.78	691.299	3123.09	9714.54	9218.44	18676.3	7206.35	7102.48	7462.44
tr|I6TEV2|I6TEV2_HORVU	C[CAM]PAIQTIVHAIVMQQQQ	655.673	3	b8	24.13	883.471	1	b	8	19248.5	21688.7	18427.2	19054.8	11140.9	17434.6	9875.45	3572.8	14136.4	14683.4	7356.32	14990.7	15406.5	13768.1	14151	11349.6	12282.1	8971.23	10419.1	8207.18	5311.63	11385	7175.84	2857.86	19520.1	17967.4	13249.9	1155.54	464.859	4939.38	8654.45	16035.3	24573.7	10561.3	9018.97	12959.7
tr|I6TEV2|I6TEV2_HORVU	C[CAM]PAIQTIVHAIVMQQQQ	655.673	3	b12	24.13	1303.72	1	b	12	12765.9	12183	10643.6	10422	7250.33	13896.6	5802.28	1981.59	7024.92	10042.7	6727.92	9053.13	9455.93	10662.9	10838.5	9495.53	10534.1	7098.12	5153.54	4203.95	5299.79	5966.49	4056.74	3986.4	11747.8	11949.4	7874.2	2011.47	878.121	3123.07	8144.4	6941.64	17784.3	7452.52	8589.27	8091.78
tr|I6TEV2|I6TEV2_HORVU	C[CAM]PAIQTIVHAIVMQQQQ	655.673	3	b11	24.13	1204.65	1	b	11	14889.8	13111.4	11359.6	12958.7	8161.24	13747.4	6161.94	1109.26	6040.73	6974.56	3697.64	9195.91	9670.39	10943.4	9760.03	8965.74	9570.19	6414	5276.27	3864.23	3916.91	6493.22	8088.65	4647.26	13398.1	13896.6	8267.8	1255.98	1044.17	4673.51	10987.3	6907.63	17347.8	7497.61	6925.21	8077.39
tr|I6TEV2|I6TEV2_HORVU	C[CAM]PAIQTIVHAIVMQQQQ	655.673	3	b13	24.13	717.883	2	b	13	13770.8	10004.3	10695.6	6867.91	5883.38	9524.32	6435.27	586.259	5915.25	7453.18	3643.12	6781.43	10325.5	9860.43	7574.18	8231.46	8162.69	5467.57	5021.85	4691.21	3926.76	6470.32	3084.69	2525.49	9253.33	12966.7	8473.06	1177.88	303.987	2863.78	8272.76	5262.01	10337.5	4978.02	7146.23	8846.95
tr|I6TEV2|I6TEV2_HORVU	C[CAM]PAIQTIVHAIVMQQQQ	655.673	3	b15	24.13	845.942	2	b	15	15807.6	13908.5	11854.3	14715.8	7834.34	10720.3	5202.52	0	6024.45	10174.8	4249.51	7703.98	8491.72	12489	9512.29	9348.49	11154.1	7782.38	7470.06	4718.17	5304.94	6067.02	4745.84	3180.44	13854.5	18286.5	10607.6	266.64	0	2398.83	9723.49	8546.61	13476.5	8509.26	6745.84	9040.16
tr|I6TEV2|I6TEV2_HORVU	C[CAM]PAIQTIVHAIVMQQQQQQ	741.045	3	b11	23.9183	1204.65	1	b	11	9836.46	14415.3	11644.1	13089.8	6647.9	2728.85	5916.53	4058.61	7915.78	6233.46	4611.63	7925.42	3097.13	9671.72	8892.59	9323.38	12966.8	8147.63	6814.31	2488.35	4466.4	648.228	4118.97	3375.63	14043	11421.4	2527.36	4954.1	287.442	0	7473.59	7734.46	14336.1	6952.04	7450.98	6476.97
tr|I6TEV2|I6TEV2_HORVU	C[CAM]PAIQTIVHAIVMQQQQQQ	741.045	3	b12	23.9183	1303.72	1	b	12	12860.9	10273	10425.5	9339.53	7606.82	1344.16	5631.61	5402.96	7286.09	9403.29	3738.57	8194.22	2103.24	9778.71	9926.81	12633.8	11350.4	7606.31	6055.18	1227.14	4902.16	1050.58	5486.79	2840.72	14671.9	15248.5	0	8306.28	1158.78	720.654	7293.99	8844.41	15585.1	6915.78	6538	7723.62
tr|I6TEV2|I6TEV2_HORVU	C[CAM]PAIQTIVHAIVMQQQQQQ	741.045	3	b16	23.9183	909.971	2	b	16	7047.02	6916.41	6811.81	8632.46	4969.73	1814.18	4023.8	2174.54	4316.62	4174.37	3039.93	4908.06	0	3786.21	7086.18	7944.2	10225.9	7085.52	4531.19	1999.37	3129.63	459.378	0	0	7527.48	10311	1878.97	0	5429.89	2374.26	0	0	0	0	8189.46	6888.66
tr|I6TEV2|I6TEV2_HORVU	C[CAM]PAIQTIVHAIVMQQQQQQ	741.045	3	b13	23.9183	1434.76	1	b	13	10196.4	7773.2	8424.94	6007.93	3843.39	985.703	5459.87	3649.78	4095.87	6315.97	4428.45	5700.96	1231.72	6653.27	7234.56	10183.7	7893.28	0	0	297.718	4123	934.871	3853.23	2080.8	11161.8	10858.8	1381.97	5693.87	1274.23	829.546	0	5063.57	9515.59	7367.83	6207.24	5096.12
tr|I6TEV2|I6TEV2_HORVU	C[CAM]PAIQTIVHAIVMQQQQQQ	741.045	3	b17	23.9183	974.001	2	b	17	6498.88	9412.11	8421.47	8105.04	4538.56	0	5428.07	2371.47	6680.31	6121.01	2842.06	7420.61	0	7324.59	6981.06	6487.6	8492.86	4769.38	4954.99	528.827	3799.63	0	4565.8	2066.05	5352.43	0	586.84	0	895.993	468.278	0	0	0	3570.24	5118.19	5327.39
tr|I6TEV2|I6TEV2_HORVU	C[CAM]PAIQTIVHAIVMQQQQQQ	741.045	3	b18	23.9183	1038.03	2	b	18	4655.57	3731.45	3437.4	3910.19	3019.81	301.124	2080.08	1634.92	2342.04	2791.73	2120.53	1888.09	266.934	2513.18	3013.87	2488.33	3531.44	1783.69	2001.65	426.35	1621.7	0	804.645	929.793	3792.99	4538.93	0	1420.09	87.4803	0	2309.9	2522.69	5234.71	2150.82	1801.72	2494.05
tr|I6TEV2|I6TEV2_HORVU	C[CAM]PAIQTIVHAIVMQQQQQQVQ	816.754	3	b19	23.615	1102.06	2	b	19	2477.4	3286.53	178.761	310.135	2185.77	3058.21	0	1390.18	0	0	146.405	209.561	2358.99	2521.32	2686.87	1024.43	1541.76	942.149	95.4977	580.125	1019.18	347.694	0	0	0	525.526	1519.36	0	629.622	802.463	1869.99	0	3644.28	156.306	2681.18	4242.63
tr|I6TEV2|I6TEV2_HORVU	C[CAM]PAIQTIVHAIVMQQQQQQVQ	816.754	3	b12	23.615	1303.72	1	b	12	10920.1	11719	2080.55	0	6198.38	8613.93	291.461	3683.57	1364.8	0	935.746	1955.45	9299.89	9278.13	8208.73	3342.53	6811.99	195.583	1100.73	425.484	2007.49	431.513	2049.86	466.896	5350.19	1052.16	2049.29	765.694	9874.77	0	4714	155.585	11144.2	740.541	0	5749.08
tr|I6TEV2|I6TEV2_HORVU	C[CAM]PAIQTIVHAIVMQQQQQQVQ	816.754	3	b17	23.615	974.001	2	b	17	3073.18	3166.6	1021.59	219.802	1690.03	2298.81	95.5033	1589.64	222.842	694.117	440.028	309.968	1880.02	1759.88	2103.98	912.819	2079.5	2349.32	97.5081	101.385	478.627	0	767.966	143.524	657.875	0	2947.44	987.492	515.239	1420.98	1852.54	2271.03	3742.36	0	0	1191.83
tr|I6TEV2|I6TEV2_HORVU	C[CAM]PAIQTIVHAIVMQQQQQQVQ	816.754	3	b10	23.615	1091.57	1	b	10	16833.3	0	0	3884.95	9528.95	17505.6	1017.63	0	0	3836.83	840.515	755.424	7618.43	7181.25	8522.82	2231.97	7721.72	1471.05	749.967	1484.59	3495.77	2487.02	3693.06	257.498	1177.58	1653.58	5839.91	8505.98	3860.68	3345.36	8713.58	3555.35	10909.1	1983.32	2146.46	0
tr|I6TEV2|I6TEV2_HORVU	C[CAM]PAIQTIVHAIVMQQQQQQVQ	816.754	3	b11	23.615	1204.65	1	b	11	9769.05	11361.7	3231.54	4914.56	3855.07	7059.6	1290.84	2149.31	974.248	3128.21	2188.8	250.117	7065.27	8666.86	8231.75	2733.05	5798.77	143.184	279.485	542.451	2240.22	1209.94	2822.39	225.966	3526.64	2816.42	1576.47	1635.46	4357.47	359.375	5649.2	0	9992.84	389.045	659.889	4085.34
tr|I6TEV2|I6TEV2_HORVU	C[CAM]PAIQTIVHAIVMQQQQQQVQ	816.754	3	b15	23.615	845.942	2	b	15	3677.76	4071.97	1471.36	179.958	1690.46	2409.98	441.775	1378.91	741.194	364.691	126.099	281.153	3450.15	1640.22	1867.11	1134.93	2225.76	371.68	954.041	0	742.872	0	797.098	250.213	722.835	917.294	458.365	286.405	266.858	162.071	2599.63	856.743	4802.38	364.665	345.445	3191.65
tr|I6TEV2|I6TEV2_HORVU	C[CAM]PAIQTIVHAIVMQQQQ	983.006	2	b11	24.1337	1204.65	1	b	11	10171.2	2366.59	5532.74	4160.85	3541.07	8628.03	3665.06	520.031	2201.33	8480.65	3974.02	5231.55	4685.09	2885.81	4055.85	4991.17	5951.14	2869.85	2367.84	761.366	1363.77	3946.97	789.964	636.759	5994.07	7818.18	8142.84	4221.41	1803.25	9498.45	4163.16	3694.35	10046.3	5498.09	3260.35	5859.75
tr|I6TEV2|I6TEV2_HORVU	C[CAM]PAIQTIVHAIVMQQQQ	983.006	2	b13	24.1337	1434.76	1	b	13	4670.48	0	4720.26	0	1821.34	4316.79	502.569	1596.19	2272.11	3321.51	2780.66	4039.33	5462.33	847.879	4956.15	4568.86	4897.98	2194.59	2059.76	0	2544.23	2841.04	457.443	152.428	1268.45	4742.83	0	3193.61	1090.42	0	4016.59	782.3	5953.97	0	3026.81	2807.38
tr|I6TEV2|I6TEV2_HORVU	C[CAM]PAIQTIVHAIVMQQQQ	983.006	2	b12	24.1337	1303.72	1	b	12	7110.29	3690.74	6655.3	4326.05	5407.62	5429.92	1662.06	599.296	1430.58	7081.01	2307.92	5386.97	4641.73	1973.29	6566.02	5713.4	7212.23	4288.36	3182.73	1252.25	2101.89	3036.12	1191.87	867.087	3659.43	0	1074.8	3272.77	3039.86	28034.5	4612.54	10617.6	8584.27	3530.83	5901.9	4342.15
tr|I6TEV2|I6TEV2_HORVU	C[CAM]PAIQTIVHAIVMQQQQ	983.006	2	b14	24.1337	1562.82	1	b	14	4108.69	383.832	4275.64	184.45	2066.81	3549.52	0	723.494	3112.9	3613.56	1805.49	2024.68	3511.73	544.44	3617.21	3806.41	2457.84	2471.15	1371.23	0	1130.61	2768.68	573.92	207.573	0	3050.96	12669.5	1431.49	0	0	2145.46	0	4361.84	1550.48	2600.65	2964.87
tr|I6TEV2|I6TEV2_HORVU	C[CAM]PAIQTIVHAIVMQQQQ	983.006	2	b15	24.1337	1690.88	1	b	15	3177.02	110.444	2543.57	0	2015.96	2615.18	500.167	0	915.954	2689.79	1099.89	889.589	1964.43	0	2905.55	1675.27	3391.28	1322.86	1226.54	340.554	860.181	1502.05	135.095	0	153.269	3359.87	612.661	2575.06	0	0	1726.2	475.591	3652.62	1799.72	1041.79	1511.47
tr|I6TEV2|I6TEV2_HORVU	C[CAM]PAIQTIVHAIVMQQQQ	983.006	2	b9	24.1337	1020.53	1	b	9	3545.84	1281.49	5512.76	2565.71	2316.81	3535.68	1711.99	717.168	769.925	3525.38	2337.36	4261.93	3257.66	1119.8	3493.81	0	4852.13	1042.02	1210.46	360.91	753.509	0	1923.47	420.973	2435.05	7890.78	725.788	497.02	9522.86	775.37	2321.45	7340.73	5516.75	2926.6	2120.75	0
tr|I6TEV2|I6TEV2_HORVU	C[CAM]PAIQTIVHAIVMQQQQQ	698.359	3	b11	24.0588	1204.65	1	b	11	7417.49	5298.04	7540.98	6496.26	3073.73	2368.59	4635.81	2883.18	3995.13	4406	2128.99	5528.61	1546.07	7811.42	5526.01	2860.83	5902.48	2568.07	2503.19	2438.21	2035.12	4081.58	1979.91	1360.35	5140.2	7096.63	3476.2	1123.3	2379.66	714.214	4202.77	5058.47	9109.32	2087.46	4347.73	2460.34
tr|I6TEV2|I6TEV2_HORVU	C[CAM]PAIQTIVHAIVMQQQQQ	698.359	3	b8	24.0588	883.471	1	b	8	3797.06	2663.48	5601.47	6724.77	0	1801.71	2587.43	1856.06	2798.47	5397.28	1875.93	5118.4	0	3048.56	6115.66	4602.41	4047.77	2630.55	2386.49	1892.32	1877.69	2684	1931.63	898.083	6139.51	6293.06	4190.57	2556.38	2439.51	1038.95	3210.75	5418.02	7933.65	2524.66	3401.15	1624.59
tr|I6TEV2|I6TEV2_HORVU	C[CAM]PAIQTIVHAIVMQQQQQ	698.359	3	b14	24.0588	781.913	2	b	14	18837.7	4602.03	5058.99	6110.52	2139.34	2827.89	3972.26	3539.09	494.484	6369.22	6438.36	5199.41	2178.52	9515.89	7274.87	1813.35	6834.28	3352.78	0	1777.58	5059.26	0	2869.16	0	8067.67	11674.4	6188.84	2184.05	3482.53	2460.29	5727.09	4212.88	12532.5	1870.23	9109.4	1328.67
tr|I6TEV2|I6TEV2_HORVU	C[CAM]PAIQTIVHAIVMQQQQQ	698.359	3	b12	24.0588	1303.72	1	b	12	8081.44	6394.1	6666.63	4717.85	3509.24	5043.24	3762.45	2783.18	0	5626.37	2159.48	5600.5	2992.85	4906.17	6777.93	3374.69	6606.9	3801.24	2668.35	4440.4	2242.65	3769.13	2114.85	733.977	6724.86	7933.69	4207.1	2312.77	2449.19	1544.43	4423.65	4979.7	11189.9	2340.04	4681.41	4399.49
tr|I6TEV2|I6TEV2_HORVU	C[CAM]PAIQTIVHAIVMQQQQQ	698.359	3	b15	24.0588	845.942	2	b	15	4733.94	3157.89	6458.8	4379.05	1660.55	3034.85	2050.2	1893.6	235.467	3713.06	2587.66	4075.2	2402.95	3997.35	2976.25	1459.59	4418.28	2464.57	2584.21	2039.26	2051.81	2141.53	2187.33	1026.42	5887.66	5236.49	3219.62	1592.27	794.879	1073.12	3349.07	2603.64	6775.6	1246.28	3564.09	1532.43
tr|I6TEV2|I6TEV2_HORVU	C[CAM]PAIQTIVHAIVMQQQQQ	698.359	3	b17	24.0588	974.001	2	b	17	4974.21	0	3334.75	2866.76	311.05	479.834	2639.85	1657.43	434.252	2452.92	1977.88	3966.29	0	3042.44	3113.75	251.002	4091.92	1998.7	1568.54	1610.36	1259.38	1608.15	1088.4	0	4887.91	5573.45	3135.48	1616.94	1478.18	1222.28	2146.43	2367.23	5464.27	0	2268.36	0
tr|I6TEV2|I6TEV2_HORVU	C[CAM]PAIQTIVHAIVMQQQQQQVQQ	859.441	3	b11	22.753	1204.65	1	b	11	19678.4	6601.73	8595.43	3445.59	12076.8	584.477	8142.72	337.421	7698	14168.9	2917.01	3321.17	4315.6	4429.23	3971.28	3297.43	2852.34	7174.87	2382.64	3531.51	5316.64	3452.5	0	1415.82	3844.97	17080.2	3504.13	4078.97	0	1626.81	9104.49	6207.31	8526.73	8331.54	1046.58	2824.43
tr|I6TEV2|I6TEV2_HORVU	C[CAM]PAIQTIVHAIVMQQQQQQVQQ	859.441	3	b20	22.753	1151.59	2	b	20	0	2030.23	2711.13	0	0	5250.93	0	1041.69	0	0	3698.4	0	4183.89	5765.53	2601.82	0	6704.07	0	3132.85	4226.35	246.911	3272.27	1856.7	3505.49	8451.69	0	1027.24	7004.97	0	1302.81	408.072	5024.91	0	0	5854.77	0
tr|I6TEV2|I6TEV2_HORVU	C[CAM]PAIQTIVHAIVMQQQQQQVQQ	859.441	3	b21	22.753	1215.62	2	b	21	0	502.704	0	0	0	746.811	0	0	598.109	607.694	0	1315.25	4034.34	1080.56	0	0	649.028	1214.56	0	505.128	0	2635.27	798.778	0	3959.15	0	0	2132.04	916.18	514.616	0	4345.29	0	0	498.39	1977.04
tr|I6TEV2|I6TEV2_HORVU	C[CAM]PAIQTIVHAIVMQQQQQQVQQ	859.441	3	b12	22.753	1303.72	1	b	12	22855.5	7588.54	9157.64	4723.54	10340.6	0	10285.7	440.655	10594.2	14395.8	1994.95	3155.92	0	5415.7	5919.68	3364.39	4510.34	10084.4	9531.91	3533.04	7054.6	5001.38	0	1812.52	6900.19	20965.4	5051.95	15607.7	3232.32	4398.73	11034.5	0	8229.83	9536.04	2087.71	3181.06
tr|I6TEV2|I6TEV2_HORVU	C[CAM]PAIQTIVHAIVMQQQQQQVQQ	859.441	3	b19	22.753	1102.06	2	b	19	0	0	473.59	1562.56	0	8985.65	0	1988.4	378.915	0	238.354	1075.75	1750.3	2461.01	2496.94	1218.23	2527.76	0	864.288	1514.04	0	0	1434.6	1192.88	3313.35	0	2920.62	775.126	687.468	284.41	0	0	1795.79	0	2203.22	1910.62
tr|I6TEV2|I6TEV2_HORVU	C[CAM]PAIQTIVHAIVMQQQQQQVQQ	859.441	3	b14	22.753	1562.82	1	b	14	2000.75	231.845	671.68	1716.53	1182.03	2183.23	1668.77	241.031	1028.07	1801.65	747.911	1262.37	630.522	511.788	0	1703.53	530.823	746.724	0	373.601	762.211	1059.58	217.53	608.614	1218.08	3172.99	1477.47	0	403.054	152.552	1699.36	809.46	2488.98	1628.01	578.588	211.265
tr|C3W8N0|C3W8N0_HORVD	YDVGNLIPGGFK	640.338	2	y9	20.2344	902.509	1	y	9	82803.3	65386.1	32665.5	39359.1	41351.1	85851.1	28688.5	24842.7	16133.6	150562	36581.5	86410.5	0	2048.48	1224.66	2506.07	881.371	1984.83	1753.83	3444.09	588.024	2485.81	4103.76	4629.65	404183	469090	227459	148780	58125.9	57492.3	298712	285105	363054	277506	268057	353739
tr|C3W8N0|C3W8N0_HORVD	YDVGNLIPGGFK	640.338	2	y10	20.2344	1001.58	1	y	10	29965.8	25997.1	13191.1	14213.5	14681	35394	12746.2	9030.23	5064.69	52938.2	13271.8	31529.3	0	6493.83	7935.93	1486.78	596.428	0	740.581	1860.48	306.998	3642.94	1838.97	1535.8	164269	199432	95273.6	67187.7	25307.6	25978.7	112446	118851	155278	118581	117856	152083
tr|C3W8N0|C3W8N0_HORVD	YDVGNLIPGGFK	640.338	2	y7	20.2344	731.445	1	y	7	25180.1	22644.1	10176.5	12150.3	14175.1	28874.7	11255.2	7380.56	5071.33	51935.3	13853.1	27392.4	1278.47	2133.84	2429.97	1220.58	589.789	1295.07	608.855	1232.57	468.373	1675.2	1547.67	1003.21	158268	192603	91967.8	75190.9	33003.3	36307.3	98871.6	104042	136031	100701	100142	124495
tr|C3W8N0|C3W8N0_HORVD	YDVGNLIPGGFK	640.338	2	y8	20.2344	845.488	1	y	8	24057	18912.6	12744.3	13623.8	11945.5	23528.2	11387.4	6458.17	3197.73	43095.5	10492	26321.7	4207.21	1955.79	2998.19	1149.78	0	2821.2	730.866	1329.89	1449.47	1730.4	1404.78	1622.03	131589	153606	76170.5	54948	23199.5	26474.5	99548.5	90975.4	120901	89093.2	82965.5	109814
tr|C3W8N0|C3W8N0_HORVD	YDVGNLIPGGFK	640.338	2	b6	20.2344	662.314	1	b	6	32178.9	26416.6	17123.8	21968.2	18627.9	25753.6	11862.7	8752.69	6949.84	44448.1	17131.9	26745.5	1167.86	19285.3	18342.9	0	13151	1656.73	0	0	301.088	8666.48	0	0	115304	137742	74162.5	54486.3	25035.7	24559.5	78265.6	75983.2	100536	75718.9	74592.3	97108.7
tr|C3W8N0|C3W8N0_HORVD	YDVGNLIPGGFK	640.338	2	y11	20.2344	1116.6	1	y	11	29305.7	21741.4	0	0	0	27790.5	0	4114.74	0	36044.4	0	22857.7	356.115	900.188	0	0	0	0	0	0	523.976	0	0	1311.05	73621	81690.7	38636.6	30223.3	13066.9	18808.9	55943.2	54033.3	75175.5	46996.2	52780.3	67015.5
tr|C3W8N0|C3W8N0_HORVD	DDRPYADGTGNPDTGADFGAAPDIDHLNLR	789.862	4	y9	17.9738	1092.58	1	y	9	97813.3	65746.6	50701.5	2040.17	0	90524.8	68000.9	424.509	0	140557	75358.5	147787	21128.9	25753.5	0	3831.08	4617.43	1126.56	19193.3	27505.9	145.362	26158.5	24069.3	26519.7	409355	449433	304963	173725	65541.4	0	274059	337554	428247	261756	321890	293070
tr|C3W8N0|C3W8N0_HORVD	DDRPYADGTGNPDTGADFGAAPDIDHLNLR	789.862	4	y23	17.9738	1162.55	2	y	23	0	0	0	6288.15	3275.55	0	56696.5	2242	3709.54	0	0	0	35574.5	27872.3	2127.34	5902.34	0	0	25311.6	23694.5	2176.28	33875.1	26916.9	23381.1	133922	226469	305173	323514	173001	0	84123	83539.5	79771.4	60355	0	0
tr|C3W8N0|C3W8N0_HORVD	DDRPYADGTGNPDTGADFGAAPDIDHLNLR	789.862	4	b7	17.9738	833.342	1	b	7	44526.6	35869	25657.2	3597.72	16030.9	43480.6	31151.5	4988.17	4872.21	69549.3	33219.1	68461.8	0	7070.62	8979.45	0	0	2881.82	0	9339.63	911.655	0	12241.5	10607.9	194369	207490	150331	77213.7	21322.4	1653.19	121289	159011	215508	124662	154358	140272
tr|C3W8N0|C3W8N0_HORVD	DDRPYADGTGNPDTGADFGAAPDIDHLNLR	789.862	4	y19	17.9738	997.982	2	y	19	14458.7	13206.1	7179.44	1079.84	733.874	15631.7	9076.98	209.47	0	26023.5	11122.5	29408.6	0	0	262.451	583.981	558.464	922.7	1805.77	2986.84	0	0	3249.86	2938.47	77949.4	75458.2	52615.6	28085.6	0	3204.84	50085.2	55579.1	79820.1	51314.4	58847.1	60233.8
tr|C3W8N0|C3W8N0_HORVD	DDRPYADGTGNPDTGADFGAAPDIDHLNLR	789.862	4	b10	17.9738	1048.43	1	b	10	34733.4	0	0	8854.25	8964.84	0	66043.1	7186.2	3091.47	54444.8	0	97394.4	31363.2	22550.8	0	7097.57	6922.72	2101.08	28779.9	26765.8	1825.11	45439.1	37635.5	27595.9	132209	138399	90598.7	47658.5	13781.8	340.008	121238	127304	166319	119149	145554	145945
tr|C3W8N0|C3W8N0_HORVD	DDRPYADGTGNPDTGADFGAAPDIDHLNLR	789.862	4	y16	17.9738	841.418	2	y	16	0	34960.4	0	0	0	36178.3	40549.3	0	0	0	0	0	22746.8	23440.7	6587.55	0	7487.11	1919.7	15838.6	17674.2	0	26066.4	19460.9	14363.9	83444.7	86211.7	71168.3	39889.1	20615	0	59961.6	72424.8	82026.1	61993.1	67332.2	69460.4
tr|C3W8N0|C3W8N0_HORVD	DDRPYADGTGNPDTGADFGAAPDIDHLNLR	1052.81	3	y9	17.9805	1092.58	1	y	9	40622.5	30359.4	16916.8	13811	19876.2	38031.2	15984.3	9158.53	9172.69	83423.3	23219.8	44364.2	806.274	482.548	500.639	269.839	0	178.353	0	376.692	396.563	1534.63	107.518	2292.95	166053	207221	110056	62113.4	16829.5	20566	93967.4	127544	144530	86538.4	134227	133206
tr|C3W8N0|C3W8N0_HORVD	DDRPYADGTGNPDTGADFGAAPDIDHLNLR	1052.81	3	y23	17.9805	1162.55	2	y	23	6788.52	5481.53	2848.16	2673.05	2966.43	4437.54	3046.92	0	1924.44	12791.6	4842.39	4870.64	1093.99	3196.05	9408.87	3803.24	2795.78	1231.98	0	101.529	0	521.163	1330.39	475.323	51185.1	122411	116218	109088	51152.8	193882	18033.2	27978.1	20331.5	11421.3	14443.6	16693.2
tr|C3W8N0|C3W8N0_HORVD	DDRPYADGTGNPDTGADFGAAPDIDHLNLR	1052.81	3	y12	17.9805	1291.68	1	y	12	16704.4	13920.8	8796.16	7347.02	7603.76	16396.9	8731.98	5768.46	0	29413.9	11279.9	12312.1	844.435	211.323	467.651	949.005	192.232	201.666	1466.93	0	243.529	2738.1	198.616	848.241	57200.2	69346.9	39107.1	22739.8	5576.53	17467.5	34535.2	42904.5	46549.5	28285.2	43970.1	51148
tr|C3W8N0|C3W8N0_HORVD	DDRPYADGTGNPDTGADFGAAPDIDHLNLR	1052.81	3	y10	17.9805	1163.62	1	y	10	13609.3	8530.16	4628.61	4650.21	5178.18	9842.64	3447.79	3540.35	2451.37	19928.2	6681.56	12721.6	0	1124.52	543.108	726.753	3341.79	3091.56	847.048	465.146	0	212.397	1224.99	594.384	49982.8	56083	43863.8	33872.4	17987.3	89003.6	24839.2	33954.6	38303.9	25000.7	37067.4	34341.8
tr|C3W8N0|C3W8N0_HORVD	DDRPYADGTGNPDTGADFGAAPDIDHLNLR	1052.81	3	b13	17.9805	1374.56	1	b	13	0	0	0	0	3442.7	0	2541.67	1409.96	2048.48	0	4098.69	9676.54	2114.26	124.613	0	841.22	191.542	335.063	694.704	0	547.768	141.862	0	498.59	42010.3	50820.3	28983.1	13542.4	3811.97	0	17577.7	27704.9	29834.9	17521.5	27045.1	25075.7
tr|C3W8N0|C3W8N0_HORVD	DDRPYADGTGNPDTGADFGAAPDIDHLNLR	1052.81	3	b17	17.9805	1718.69	1	b	17	5781.73	4028.23	2255.59	2392.44	2358.53	4152.37	2610.25	1414.29	1475.66	8394.53	2829.31	5367.08	689.443	455.257	201.555	191.841	243.637	289.579	82.4543	109.245	108.637	0	615.803	499.044	24502.4	27433.6	16552	9544.61	2765.19	0	13122.6	17635.7	19043.7	10766.5	16746.6	21169.1
tr|C3W8N0|C3W8N0_HORVD	DDRPYADGTGNPDTGADFGAAPDIDHLNLR	632.091	5	y5	17.543	652.389	1	y	5	0	9760.76	5780.09	1491.48	1448.37	14356	1297.71	0	4260.39	24065.9	357.607	11701.7	0	0	2695.36	2427.85	1010.56	505.797	3926.62	0	912.011	676.375	280.17	0	54319	57187.6	44525.9	36846.1	19690.4	0	29613.9	44160.8	42407.9	29774.6	32593.6	32989.3
tr|C3W8N0|C3W8N0_HORVD	DDRPYADGTGNPDTGADFGAAPDIDHLNLR	632.091	5	y9	17.543	1092.58	1	y	9	6907.88	13058.6	2698.63	780.104	1081.75	6724.8	3561.98	2603.14	2767.14	13649.4	334.056	10157.6	0	3565.89	0	0	1055.59	539.707	2478.51	1688.41	2865.9	0	0	13931.2	34045.8	37882.6	33823.4	19116.7	5898.28	9640.81	20757.4	47839.6	28804.8	18444.9	34815.4	26689.7
tr|C3W8N0|C3W8N0_HORVD	DDRPYADGTGNPDTGADFGAAPDIDHLNLR	632.091	5	y6	17.543	767.416	1	y	6	2251.33	16870.4	0	2870.95	3250.74	18481.3	1958.37	4659.01	7749.69	26810.3	2102.02	9531.77	2002.67	12315.2	6252.46	5744.9	4030.27	270.176	0	3987.26	4715.83	5781.1	1088.87	35451.7	37385.5	42593.7	23749.1	17894.7	9182.41	10507.9	20281.4	19786	29133.4	19559.9	16389.2	28146.1
tr|C3W8N0|C3W8N0_HORVD	DDRPYADGTGNPDTGADFGAAPDIDHLNLR	632.091	5	b7	17.543	833.342	1	b	7	1081.77	0	1448.67	1342.8	3190.46	4877.89	0	541.998	2679.4	9812.94	1070.14	5249.18	3046.68	0	1359.96	0	0	1801.58	4385.72	0	1478.5	2209.32	288.619	0	23968.3	28804	18138.4	11687.7	3578.98	7875.14	13365.4	0	19792.5	12449.7	0	17837.7
tr|C3W8N0|C3W8N0_HORVD	DDRPYADGTGNPDTGADFGAAPDIDHLNLR	632.091	5	y23	17.543	1162.55	2	y	23	1059.56	10173.2	8644.4	0	639.337	12367.4	1168.62	0	9001.24	8778.18	0	8417.71	2228.14	0	844.784	9185.41	460.223	270.25	420.079	141.671	1424.07	726.299	0	2653.2	16190.8	30688.6	30108	26252	12499.5	42735.8	10538.4	0	13538.1	7306.52	0	10829.5
tr|C3W8N0|C3W8N0_HORVD	DDRPYADGTGNPDTGADFGAAPDIDHLNLR	632.091	5	y7	17.543	880.5	1	y	7	0	2306.16	0	749.488	983.154	1849.78	1556.06	1171.37	819.09	6581.39	748.75	4274.77	3055.35	1015.45	2272.31	1545.55	3008.18	527.143	233.643	192.034	0	1313.63	6173.53	5556.03	17463.2	20553.9	12218.1	7658.46	3018.7	6605.25	8204.31	16157.7	14173.8	8428.3	11220.4	9527.64
tr|Q84LE9|Q84LE9_HORVU	DVSPEC[CAM]RPVALSQVVR	604.653	3	y14	13.5949	799.428	2	y	14	1.43651e+06	1.38137e+06	1.56963e+06	1.1604e+06	1.17805e+06	1.21897e+06	1.17503e+06	1.1249e+06	1.13298e+06	1.48989e+06	1.17361e+06	1.17786e+06	1.34447e+06	1.35765e+06	1.43553e+06	1.32324e+06	1.38e+06	1.10193e+06	1.1838e+06	1.0492e+06	1.07268e+06	1.22536e+06	954573	983205	1.15155e+06	1.15609e+06	899562	351843	118340	61522.5	1.17528e+06	1.28935e+06	1.27596e+06	1.04173e+06	1.16937e+06	1.26036e+06
tr|Q84LE9|Q84LE9_HORVU	DVSPEC[CAM]RPVALSQVVR	604.653	3	y13	13.5949	755.912	2	y	13	1.44351e+06	1.34254e+06	1.5341e+06	1.15964e+06	1.11854e+06	1.30505e+06	1.15872e+06	1.04225e+06	1.21658e+06	1.48488e+06	1.16195e+06	1.09602e+06	1.29834e+06	1.22722e+06	1.30294e+06	1.23719e+06	1.28342e+06	1.02101e+06	1.06138e+06	1.08988e+06	1.13319e+06	1.20355e+06	1.00164e+06	871884	1.13647e+06	1.18969e+06	823491	341707	128268	68880.6	1.06101e+06	1.23837e+06	1.2498e+06	1.09603e+06	1.08899e+06	1.21063e+06
tr|Q84LE9|Q84LE9_HORVU	DVSPEC[CAM]RPVALSQVVR	604.653	3	y9	13.5949	968.589	1	y	9	827561	748085	827699	608833	530975	670848	616139	516035	642871	833538	586082	585772	728840	703736	748642	645409	710769	503839	580748	543985	560830	621668	487329	416052	566923	612932	405725	167606	73906.4	34824.3	595702	694787	718082	559053	571181	650909
tr|Q84LE9|Q84LE9_HORVU	DVSPEC[CAM]RPVALSQVVR	604.653	3	y11	13.5949	642.864	2	y	11	836519	734295	810528	615900	496476	667166	606084	484277	637980	892637	572683	516999	682394	631703	727546	577325	679903	427466	505759	472393	488247	547624	423824	335215	519100	590283	416266	183850	70815.3	31192.9	541472	637635	709231	498195	535327	600216
tr|Q84LE9|Q84LE9_HORVU	DVSPEC[CAM]RPVALSQVVR	604.653	3	y12	13.5949	707.385	2	y	12	702873	623862	637419	501576	418577	577942	513265	410269	532419	736689	488250	456188	574895	497198	608619	487668	562215	357068	426081	412124	421927	465729	348773	293107	445022	487049	332859	165544	57289.4	20765.1	455019	533494	591187	424257	444777	505040
tr|Q84LE9|Q84LE9_HORVU	DVSPEC[CAM]RPVALSQVVR	604.653	3	y7	13.5949	772.468	1	y	7	685871	616845	670034	483013	396811	550959	514821	387769	541911	720324	451492	450468	575990	531591	590483	476553	572204	342390	409973	378236	412106	442826	325589	280050	425379	481631	323742	168894	67980.5	19003.3	478997	557486	617840	417322	444757	497897
tr|Q84LE9|Q84LE9_HORVU	AQQLAAQLPAMC[CAM]R	729.371	2	y8	13.7324	946.46	1	y	8	777977	669311	730790	504879	367237	594511	564501	354145	502064	853359	442438	539862	505532	489992	581937	454634	596250	253289	400500	352521	370429	454321	281501	220614	442790	565740	339563	150478	59838.3	73795	562935	656726	1.29915e+06	479127	577983	676399
tr|Q84LE9|Q84LE9_HORVU	AQQLAAQLPAMC[CAM]R	729.371	2	y9	13.7324	1017.5	1	y	9	870474	780127	810373	563050	415159	676047	622933	385124	575737	953367	464298	632516	562205	549647	633724	506544	690762	295880	441080	388035	418193	507275	325502	244815	499704	617613	355080	160746	57535.7	59747.4	612958	725375	1.44233e+06	532986	601125	773363
tr|Q84LE9|Q84LE9_HORVU	AQQLAAQLPAMC[CAM]R	729.371	2	y7	13.7324	875.423	1	y	7	466653	411689	441880	319318	227603	389806	347420	220078	306637	528793	261851	338918	303358	299536	356600	273199	362977	158122	235224	208359	219366	265592	159884	129595	261347	347817	206011	103884	41178.8	53057.6	335502	392841	807063	288940	350890	421995
tr|Q84LE9|Q84LE9_HORVU	AQQLAAQLPAMC[CAM]R	729.371	2	y10	13.7324	1130.58	1	y	10	401459	353865	367866	256066	168965	294261	301449	177238	261675	429121	217132	288013	258809	242922	297328	225303	292689	126122	193890	180103	188387	224889	143015	104674	201250	261695	147022	64009.6	28956.2	26574.7	280351	315387	679885	227171	279093	347195
tr|Q84LE9|Q84LE9_HORVU	AQQLAAQLPAMC[CAM]R	729.371	2	b8	13.7324	824.462	1	b	8	193138	172754	191144	142620	100022	155025	147448	96995.6	138598	222607	116135	151956	139625	131330	148855	121930	145637	75922.8	108480	97149.7	101543	124987	77613.7	62682.8	117794	149182	96538.5	51652.1	21264.3	19564	144750	174624	318935	131893	146948	170996
tr|Q84LE9|Q84LE9_HORVU	AQQLAAQLPAMC[CAM]R	729.371	2	y11	13.7324	1258.64	1	y	11	217500	192220	203178	150837	104450	170809	161575	90493.2	143559	260604	115465	162588	136336	130809	158081	130024	169207	74880.9	112821	97428.9	107724	132263	83029.1	61398.3	115506	153170	81540.2	43092.2	18786.7	14611.8	156783	187808	407373	135480	165198	205846
tr|Q84LE9|Q84LE9_HORVU	VVDQQLVGQLPWSTGLQMQC[CAM]C[CAM]QQLR	991.49	3	y9	23.621	1251.54	1	y	9	295118	291593	306462	229393	176050	234514	221367	139882	200639	270387	145888	219109	214117	213128	225393	199096	249922	136301	149280	134873	150000	183362	127815	97296.8	208629	212928	106031	50431.9	28712.3	20552.4	229730	252578	537382	207919	207825	246166
tr|Q84LE9|Q84LE9_HORVU	VVDQQLVGQLPWSTGLQMQC[CAM]C[CAM]QQLR	991.49	3	y8	23.621	1123.48	1	y	8	390242	380657	384703	308382	237283	299594	294637	181854	273490	362127	184538	289445	299581	303361	310447	267495	325804	178136	215370	184342	207311	260829	178675	129217	281485	293518	150003	75647	36768.4	31553.2	310735	334047	665268	272587	256796	343103
tr|Q84LE9|Q84LE9_HORVU	VVDQQLVGQLPWSTGLQMQC[CAM]C[CAM]QQLR	991.49	3	b10	23.621	1080.6	1	b	10	174117	172849	175339	147703	114464	138296	140319	94551.7	133397	175983	94078.1	143429	143004	144945	143632	130678	152831	90791	103589	96904.3	94123.5	128091	86260.9	68366.1	140015	139568	76383.6	49038.7	27749.2	21065.4	145929	151454	308284	132275	130282	154985
tr|Q84LE9|Q84LE9_HORVU	VVDQQLVGQLPWSTGLQMQC[CAM]C[CAM]QQLR	991.49	3	y18	23.621	1096.01	2	y	18	0	0	0	0	0	0	0	0	0	0	0	0	0	0	0	0	0	0	0	0	0	12311.6	0	0	0	0	0	0	2298.6	1558.23	0	0	0	0	0	0
tr|Q84LE9|Q84LE9_HORVU	VVDQQLVGQLPWSTGLQMQC[CAM]C[CAM]QQLR	991.49	3	y16	23.621	1003.47	2	y	16	37097.6	38764.1	36901.7	28547.4	20542	24305	26883	17907.4	25229.6	31839.8	19027.1	28059.4	28136.6	27227.7	28745.9	24284.8	29608	16313.6	20971.2	13583.5	16550.4	24795.2	14467.8	13225.1	24236.5	28785.6	15525.6	11183.7	6459.65	5885.09	27709.6	30798.9	64963.7	27439.8	24598.3	29487.3
tr|Q84LE9|Q84LE9_HORVU	VVDQQLVGQLPWSTGLQMQC[CAM]C[CAM]QQLR	991.49	3	y11	23.621	1421.64	1	y	11	150994	148210	158485	123372	90918.9	118763	120784	77377.1	110072	147205	77287.3	126838	111197	116024	119542	106369	126385	66892.1	89188.7	72566	80238.5	98205.4	70917.7	52270.4	110946	110829	57643	33843.1	18048.9	17346	123943	132962	286635	101895	110297	134985
tr|Q84LE9|Q84LE9_HORVU	GGSFYPGGTAPPLQQGGWWGTSVK	1218.09	2	y14	21.5898	1540.79	1	y	14	175729	160407	156449	100659	65846.1	119519	196904	119728	179049	324793	137109	178403	33624.4	38928.1	42278.3	27312.9	49684.1	16936.8	32111.1	27622.3	30624.1	44844.5	29718.7	19255.8	73964.1	75805.2	26101.4	21876.4	97.5146	1045.45	133491	111391	171169	80081.4	95979	134296
tr|Q84LE9|Q84LE9_HORVU	GGSFYPGGTAPPLQQGGWWGTSVK	1218.09	2	y11	21.5898	1233.6	1	y	11	17989.4	17391.2	16594.1	10845.9	7142.48	12646.4	21194.9	10885.1	17907.8	30937.8	14005	18176.7	4743.82	4332.72	6175.69	3861.85	5277.9	1581.04	3387.7	3102.65	3300.1	4752.07	2933.59	2005.31	8495.49	6946.55	2931.52	2421.16	1164.97	2554.67	13310.3	12022.3	18415.2	8346.03	9309.37	12111.6
tr|Q84LE9|Q84LE9_HORVU	GGSFYPGGTAPPLQQGGWWGTSVK	1218.09	2	y15	21.5898	1611.83	1	y	15	23588.4	18852.5	19600.6	12391.1	8623.06	16048.4	26211.6	16042.7	23960	44071.7	20364.2	20698.7	4382.94	5775.19	6708.58	3389.16	6823.93	3327.44	3645.82	3257.35	3527.67	5019.46	3382.37	2514.03	11325.3	12045.6	5407.07	3811.02	0	467.314	16128.4	15515.3	21343.7	13067.3	11076.3	17640.6
tr|Q84LE9|Q84LE9_HORVU	GGSFYPGGTAPPLQQGGWWGTSVK	1218.09	2	y13	21.5898	1443.74	1	y	13	28266	32763.5	26431.8	16569.1	11504.5	20157	37376.1	21606.2	33609.9	56880.5	23829.5	28878.2	5703.54	6258.86	6460.33	5014.71	8497.25	2944.24	5771.41	4454.6	6414.42	6784.23	5690.58	3350.48	12734.3	13658	5827.89	3486.12	877.92	380.683	23601.6	22390.3	29700.4	16964.9	15795.3	19833.9
tr|Q84LE9|Q84LE9_HORVU	GGSFYPGGTAPPLQQGGWWGTSVK	1218.09	2	y17	21.5898	1769.9	1	y	17	0	0	0	0	0	0	0	0	0	0	0	0	0	0	0	0	0	0	0	0	0	0	0	1039.69	0	0	0	0	192.545	909.249	0	0	0	0	0	0
tr|Q84LE9|Q84LE9_HORVU	GGSFYPGGTAPPLQQGGWWGTSVK	1218.09	2	b14	21.5898	1330.64	1	b	14	0	0	0	0	0	0	0	0	0	0	0	0	0	0	0	0	0	0	0	0	0	0	0	0	0	0	0	0	663.367	225.67	0	0	0	0	0	0
tr|Q84LE9|Q84LE9_HORVU	RVVDQQLVGQLPWSTGLQMQC[CAM]C[CAM]QQLR	1043.52	3	b11	21.804	1236.71	1	b	11	126336	111159	122023	98464.6	68631.1	93269.7	88365.9	58219.8	79550	131206	66782.3	81919.6	94217.5	92918.5	98742.3	82966.9	107316	55870.4	65995.7	48418.1	68453.4	81399.4	54787.3	38341.2	99867.6	130402	66480	46674.9	33301.6	20482.7	108828	136422	238227	96770.3	106551	122097
tr|Q84LE9|Q84LE9_HORVU	RVVDQQLVGQLPWSTGLQMQC[CAM]C[CAM]QQLR	1043.52	3	y8	21.804	1123.48	1	y	8	85409.5	77028.7	83036	72003.2	45662.9	59244.7	64905.8	41894.8	55227.9	72273.2	42490.3	61004.5	57063.4	52594.4	66446.5	51347.1	65308.2	29231.2	42343.5	32433.2	44790.5	63903.6	39940.2	27535.8	62268	65357.3	40761.9	23494.3	10275.5	10942.3	62413.3	89278.6	141163	66092	79373.9	84319.3
tr|Q84LE9|Q84LE9_HORVU	RVVDQQLVGQLPWSTGLQMQC[CAM]C[CAM]QQLR	1043.52	3	b10	21.804	1123.62	1	b	10	75425.6	62155.7	75220.9	57677.6	46556.3	55133.2	56430	37667.2	51948.4	78956.2	41966.9	54018	64390.4	58943.6	62999.5	52342.6	68272.1	36616.3	42614.3	34291.2	40758.1	49228.8	32892.5	22564.1	66458.8	84188.6	59279.4	49962	64743.3	66499.8	68528.2	73668.7	129929	58815.7	62983.2	74934.1
tr|Q84LE9|Q84LE9_HORVU	RVVDQQLVGQLPWSTGLQMQC[CAM]C[CAM]QQLR	1043.52	3	y9	21.804	1251.54	1	y	9	86095.3	93380.8	109871	71818	63916.9	68976	61380.4	48016.8	56015.4	89176	45777.2	64322.1	65789.3	57830.3	68162.1	50025.3	70422.7	38011	46529.2	37697.1	50036.9	62977.5	42140.8	28389.5	69782.6	76181.2	36515	21365.9	11926.1	10818	76930.7	90097.5	151244	67474	79330	91672.5
tr|Q84LE9|Q84LE9_HORVU	RVVDQQLVGQLPWSTGLQMQC[CAM]C[CAM]QQLR	1043.52	3	y13	21.804	1609.72	1	y	13	42389.8	35460.9	37499.8	30896.8	20005.2	30256.2	29014.3	21641.9	25296.2	41032.4	19829.8	29965.7	31059	30546.7	34084.9	26753.4	34806	19507.4	19102.8	20991.9	19919.3	29137.6	18347.4	12956.8	33462.7	41263.7	26624.7	16126.2	9178.3	9568.15	38603.1	43953.3	71496.8	30877.1	33698.4	41479.1
tr|Q84LE9|Q84LE9_HORVU	RVVDQQLVGQLPWSTGLQMQC[CAM]C[CAM]QQLR	1043.52	3	y11	21.804	1421.64	1	y	11	63078	59373.9	61469.5	46516	34415.1	49401.5	43766.6	31496	43413.7	65565	33520.4	47565.9	49279.4	41934.9	49855.1	41894.1	49835.4	27693.5	35001.9	27323.7	31685.7	40774.6	26543.6	17433.4	53691.6	62190	28270.9	18843.2	10350.8	9239.51	55323	62566	114630	50715.3	49639.6	66990
tr|Q84LE9|Q84LE9_HORVU	ELYYGSPYHVSVEQPSASLK	752.039	3	y17	15.4209	924.96	2	y	17	45223.1	36173.3	41225.6	33042.4	26790.4	36562.5	95692.8	62560.9	85219.6	130417	78688.9	84375.8	23564.1	21075.9	23649.6	19751.3	31311.1	13620.3	39737.7	39808	44760.1	48138.1	44447.8	29168.7	27892.6	28691.2	14486.9	9887.15	3754.75	4427.47	80323.4	96739.3	123119	68917.7	77317.2	86758.9
tr|Q84LE9|Q84LE9_HORVU	ELYYGSPYHVSVEQPSASLK	752.039	3	y16	15.4209	843.428	2	y	16	85593.2	69685.9	84085.6	59089.8	51933.5	63938.2	125692	85342	118625	195611	105502	115066	51290.1	41202	60914.6	55659.4	60821.8	26515.8	63258.7	55311.8	60941.9	75818.6	56077.6	43079.6	43576.2	55662.8	29320.7	20412.1	9034.69	10863.6	101670	124823	153378	89846.3	104687	111884
tr|Q84LE9|Q84LE9_HORVU	ELYYGSPYHVSVEQPSASLK	752.039	3	y18	15.4209	1006.49	2	y	18	33579.7	31232.3	35417.5	28531.7	19102.4	28814.9	72270.3	49380.3	72079.9	102334	56545.9	62973	21244	16517	18538.1	17708.1	26506.8	10006	33056.1	32364.1	32530.1	39897.2	30801.4	22223.6	22792.4	21439	12901.1	6679.85	2796.72	5872.42	60803.6	76521.6	93921.2	55879.3	66661.3	64998.7
tr|Q84LE9|Q84LE9_HORVU	ELYYGSPYHVSVEQPSASLK	752.039	3	y10	15.4209	1045.55	1	y	10	61674.9	51926.8	58686.6	48105.7	31957.2	54066.1	127901	102294	134697	193002	111943	115339	31923	27546.1	28970.4	29211.2	48583.1	18325.6	75537.9	56268.9	59834.6	68376.8	50589.6	38565.2	37719.7	45309.9	26656.3	19640.9	9217.22	0	110512	137644	169236	98565.2	114592	128091
tr|Q84LE9|Q84LE9_HORVU	ELYYGSPYHVSVEQPSASLK	752.039	3	y8	15.4209	859.452	1	y	8	24036.9	26641	26514.1	23587.8	15501	21522	53180.8	32492.1	52620	83311.7	45748.2	43449.9	19193.5	9832.27	16786.6	14795.8	17743.7	6466.13	21381.3	22561.9	25376.7	30327.3	20713.7	16831	14733.8	15539.2	10030.2	10422.2	3605.94	5163.98	45305.9	55132.9	68688.6	41489.1	46801.7	49120.9
tr|Q84LE9|Q84LE9_HORVU	ELYYGSPYHVSVEQPSASLK	752.039	3	y11	15.4209	1144.62	1	y	11	29271.1	23189.3	26754.4	22298.6	17902.4	21035.7	60718.6	42187.4	59374.1	91160.1	47790.6	51097.7	16592.9	12693.8	15305.9	15887.5	20524.7	8736.81	22170.5	23986.1	26256.6	31429.5	24942.2	16925.4	17655.7	24942.5	15195.2	8112.33	4948.45	7184.34	53400	62477.6	78557.9	44234	53323.8	56706.3
tr|U5NFU3|U5NFU3_HORVU	DVGTRDPDIFYTDGHGTR	506.238	4	y6	10.8887	642.295	1	y	6	35172.7	18937	16216.4	14293.8	17360.9	32756.8	13383.2	9345.22	7200.73	76996.2	22281.1	52940.8	5470.75	7863.95	3387.38	1369.76	0	2512.53	3377.57	4449.84	4932.81	0	5393.75	5454.03	153630	247179	173234	129957	37104	122235	119300	166108	202996	99589.9	134283	160735
tr|U5NFU3|U5NFU3_HORVU	DVGTRDPDIFYTDGHGTR	506.238	4	y9	10.8887	527.241	2	y	9	25727.1	12012.3	13004.6	8510.62	15268.1	24897.8	6820.7	4104.7	0	35096.1	16574.9	27952.8	1822.5	1963.6	0	4553.85	2579.19	0	3385.52	3052.96	2161.81	2704.13	4575.94	3849.67	58207.6	55534.1	35616	17099.5	5086.39	0	53208.2	71636.7	98660.6	45469.8	79042.2	100495
tr|U5NFU3|U5NFU3_HORVU	DVGTRDPDIFYTDGHGTR	506.238	4	y7	10.8887	743.343	1	y	7	19017.8	10256.9	8396.13	8919.04	9901.34	19830.6	11319.9	5853.21	4274.03	37892.7	14179.9	27545.7	3792.06	3300.74	2586.25	6727.26	0	2099.61	2882.77	2720.57	1808.84	231.503	3292.72	3597.59	79325.7	108674	67673.6	40299.4	10263.7	28554.4	59947.4	78419.6	105966	54154.3	77160.1	90401.7
tr|U5NFU3|U5NFU3_HORVU	DVGTRDPDIFYTDGHGTR	506.238	4	b8	10.8887	856.38	1	b	8	13775.1	9642.59	6021.61	7756.77	8420.69	16586.8	6568.42	4314.62	4399.3	29533.2	9531.76	22915	6168.23	1601.54	2925.1	0	937.848	2454.65	2127.54	2683.18	1973.08	359.276	3963.33	3205.69	59313.1	82636.2	47615.3	30632.9	5693.23	20032.6	47689.7	61880.6	79186.9	47570.7	61498.4	72684.3
tr|U5NFU3|U5NFU3_HORVU	DVGTRDPDIFYTDGHGTR	506.238	4	y8	10.8887	906.406	1	y	8	8988.01	5834.16	3503.3	4100.01	5517.47	9121.52	3463.47	2271.89	3121.98	21008.8	5016.93	20530.7	1278.8	866.029	1470.59	5084.52	813.878	761.366	0	1383.33	1015.01	0	1494.46	2646.14	42971.6	59955.3	34382.1	23088.3	5392.72	16401.7	33693.9	47387.1	62993.9	30376.7	41320.5	53595.5
tr|U5NFU3|U5NFU3_HORVU	DVGTRDPDIFYTDGHGTR	506.238	4	y9	10.8887	1053.47	1	y	9	0	1598.7	1917.28	1237.36	0	3231.17	0	960.846	914.941	5867.78	1691.4	5826.04	580.363	818.876	253.194	809.658	223.529	345.952	965.335	545.015	289.755	209.204	0	506.669	12848.1	19070.9	10308.9	6737.5	0	5958.97	9942.63	13420.8	26002.1	9606.08	11408.1	15046.1
tr|U5NFU3|U5NFU3_HORVU	DVGTRDPDIFYTDGHGTR	674.649	3	b8	10.8877	856.38	1	b	8	19996.2	10443.1	0	6549.18	7549.72	18508.7	4541.36	4789.51	418.506	51870.5	7724.55	23354.9	7978.21	0	496.276	2302.14	3805.98	3980.71	3844.7	2893.22	958.941	2207.23	0	1023.04	58258.2	88294.9	55857.1	35581.2	7885.32	23222.3	46654.9	82096.9	102166	49371.9	65151.5	78465
tr|U5NFU3|U5NFU3_HORVU	DVGTRDPDIFYTDGHGTR	674.649	3	y7	10.8877	743.343	1	y	7	8845.59	4415.95	6658.99	2967.61	3884.92	8608.71	2955.41	19211.1	3537.71	20777.6	3527.15	10133.4	1920.14	3476.24	0	6113.35	29323.3	982.377	14695.2	1510.95	12626	12859.8	2071.36	1015.19	32355.5	50949.4	29049.8	19169.7	4195.54	15648.5	27574	40222.7	50379.3	22994.8	34690.1	45240.5
tr|U5NFU3|U5NFU3_HORVU	DVGTRDPDIFYTDGHGTR	674.649	3	b9	10.8877	969.464	1	b	9	0	0	3904.63	0	0	0	0	3297.04	18541.4	0	6116.5	0	0	2964.8	0	0	6625.53	0	4589	336.597	2411.15	3187.34	1117.77	0	41889.3	61807.3	29365.9	18038.6	3156.84	12868.1	36160.3	48866.6	65586.1	27716.4	47202.5	60188.5
tr|U5NFU3|U5NFU3_HORVU	DVGTRDPDIFYTDGHGTR	674.649	3	y8	10.8877	906.406	1	y	8	5149.11	5781.69	0	2024.73	3407.65	6631.13	1494.98	1473.7	0	11532.8	3261.7	8091.94	1284.86	3594.74	867.52	24865.5	0	492.008	1486.02	864.109	3375.92	1820.28	0	2921.6	25329.7	39493.5	27407.9	16431.4	2919.76	10023.5	19568.1	30135.5	40983.7	16116.2	26118.7	34207.3
tr|U5NFU3|U5NFU3_HORVU	DVGTRDPDIFYTDGHGTR	674.649	3	b7	10.8877	741.353	1	b	7	0	0	19391.7	3408.78	0	0	1050.61	852.552	0	7799.69	3705.46	4029.3	2185.31	15060.1	13017.9	8283.34	0	2111.85	4117.91	0	1478.52	1538.26	1060.64	13383.5	12447.3	22699.9	7660.99	6585.08	1049.47	6007.01	11575	14034.3	17498.8	7414.17	11270.3	15112.1
tr|U5NFU3|U5NFU3_HORVU	DVGTRDPDIFYTDGHGTR	674.649	3	b10	10.8877	1116.53	1	b	10	4368.47	2940.11	4837.6	0	0	4336.61	3565.66	1383.92	352.759	9937.22	1744.58	5824.45	287.064	0	340.892	3644.83	5796.5	756.585	0	548.675	2341.58	1981.66	1859.05	0	18631.1	30468.6	14757.1	10151.9	1733.44	10228.6	14542.7	25395	30706.8	11220.4	22294.6	24279.4
sp|P01086|IAAE_HORVU	C[CAM]C[CAM]DELSAIPAYC[CAM]R	807.839	2	y8	13.318	937.456	1	y	8	1.73956e+06	1.30197e+06	1.55851e+06	1.45756e+06	1.08348e+06	1.27536e+06	1.08614e+06	635286	951821	1.47367e+06	838493	821655	1.8544e+06	1.78204e+06	1.95591e+06	1.73115e+06	1.9174e+06	1.16758e+06	1.59416e+06	1.25963e+06	1.27836e+06	1.61843e+06	1.16763e+06	873960	1.0401e+06	1.41595e+06	889682	538157	97856.7	19295.8	1.04998e+06	1.59652e+06	1.68695e+06	1.16371e+06	1.3833e+06	1.54656e+06
sp|P01086|IAAE_HORVU	C[CAM]C[CAM]DELSAIPAYC[CAM]R	807.839	2	b8	13.318	949.375	1	b	8	244548	210946	283952	214093	181056	208104	187763	122141	197763	226098	150053	146768	286100	305108	335395	292120	335092	200796	283744	207466	217264	246656	205032	152180	189448	224332	143992	92914.9	24098.4	3338.2	180400	272542	281034	195201	222133	240594
sp|P01086|IAAE_HORVU	C[CAM]C[CAM]DELSAIPAYC[CAM]R	807.839	2	y7	13.318	850.424	1	y	7	895895	651254	799736	686920	493936	630528	507862	284671	428660	733387	386036	369193	914028	880316	978042	845120	974144	535428	752849	574711	608090	757035	522632	384869	458451	676975	456207	273922	46226.6	9215.39	472427	770570	846507	528320	676485	760543
sp|P01086|IAAE_HORVU	C[CAM]C[CAM]DELSAIPAYC[CAM]R	807.839	2	y9	13.318	1050.54	1	y	9	843472	612759	737159	650661	457834	577628	455213	256627	421474	692187	357412	330416	875026	842493	930520	802062	913313	499145	701988	559761	574368	716171	503775	364709	416079	593752	353786	213487	37647.6	8805.14	436868	739050	794262	494591	625380	706607
sp|P01086|IAAE_HORVU	C[CAM]C[CAM]DELSAIPAYC[CAM]R	807.839	2	b7	13.318	836.291	1	b	7	264300	205926	229934	235697	173359	206346	166123	102207	150064	236944	132660	138557	277029	270093	297945	261757	293234	191132	238642	195012	205471	242345	186170	144484	150453	207610	136871	94908.6	21982	0	160173	248608	257776	186742	215523	236965
sp|P01086|IAAE_HORVU	C[CAM]C[CAM]DELSAIPAYC[CAM]R	807.839	2	y10	13.318	1179.58	1	y	10	355489	247047	314611	282700	184396	224726	184513	102952	159856	278765	137626	130526	350125	340465	377248	319681	383012	200337	282892	221813	233418	294830	199233	155652	156532	226857	133542	99652.3	17468.5	2945.74	175846	297580	333982	199145	263958	294842
sp|P01086|IAAE_HORVU	FGDSC[CAM]APGDALPHNPLR	608.621	3	y6	13.4075	733.41	1	y	6	2.24113e+06	1.90952e+06	428363	2.36367e+06	2.09516e+06	1.93218e+06	1.69697e+06	1.23157e+06	1.3591e+06	2.05376e+06	1.53218e+06	1.53972e+06	2.01316e+06	1.8144e+06	2.11954e+06	2.18165e+06	2.26784e+06	1.42254e+06	2.0008e+06	1.9117e+06	1.61355e+06	2.22142e+06	1.45614e+06	1.34001e+06	1.48757e+06	1.63912e+06	1.10895e+06	712956	259237	130687	1.68339e+06	1.6962e+06	2.19515e+06	1.58946e+06	1.37792e+06	1.7551e+06
sp|P01086|IAAE_HORVU	FGDSC[CAM]APGDALPHNPLR	608.621	3	y5	13.4075	636.358	1	y	5	486502	351986	68312.3	412387	355162	359763	286715	175029	219353	409860	272452	241101	352017	314415	392936	394924	445022	204935	418155	352941	251132	386651	231457	209123	236551	281348	210735	150562	57581.3	58809.9	287176	296993	455873	256848	243713	309704
sp|P01086|IAAE_HORVU	FGDSC[CAM]APGDALPHNPLR	608.621	3	y11	13.4075	1186.63	1	y	11	793458	610702	104064	651996	531441	608047	517211	316327	395528	681722	465426	448738	628779	568162	680745	696158	745766	417812	664761	644375	486057	713094	455458	413552	433943	455845	242118	160954	49152.1	43013.6	514460	533284	744036	475112	435676	536521
sp|P01086|IAAE_HORVU	FGDSC[CAM]APGDALPHNPLR	608.621	3	y12	13.4075	629.339	2	y	12	481948	376505	52966.2	436963	391692	382318	320971	237163	255903	415306	309281	272967	381154	383199	419243	426135	454423	283859	441633	384867	297249	433932	271423	273347	289289	316083	219968	139622	46064.7	42507.2	325376	347280	493593	270906	285968	345819
sp|P01086|IAAE_HORVU	FGDSC[CAM]APGDALPHNPLR	608.621	3	y7	13.4075	846.494	1	y	7	382251	292370	33151.7	315910	264612	292145	238661	146657	181915	322815	218968	196534	307238	264598	331089	329730	374990	181414	313675	299683	214292	339604	199457	182257	197197	214120	139043	99492.6	39542.2	36266.9	245196	245418	373994	204231	198612	258864
sp|P01086|IAAE_HORVU	FGDSC[CAM]APGDALPHNPLR	608.621	3	y10	13.4075	1089.58	1	y	10	364776	276645	29129.9	297544	267965	268670	217695	134417	165032	303367	230878	186098	270540	241195	301477	304559	340420	168920	340625	277098	187921	293916	194129	180220	181608	189649	116508	77219.7	25015.3	32139.2	215802	223602	347334	193878	178529	244800
sp|P01086|IAAE_HORVU	TYVVSQIC[CAM]HQGP	694.835	2	y8	10.8503	926.415	1	y	8	1.15577e+06	884259	1.04284e+06	879041	637745	892689	494157	332308	448627	705719	451564	447191	956753	897332	998740	878621	967757	640497	585900	508470	533683	646773	452749	384451	626895	762418	458514	296338	72675.9	64345.7	479562	571709	697633	456152	584585	628658
sp|P01086|IAAE_HORVU	TYVVSQIC[CAM]HQGP	694.835	2	y9	10.8503	1025.48	1	y	9	849160	631880	772799	615009	465718	659355	349405	225672	318550	520201	304647	323369	688465	676506	722475	638883	702932	465979	438441	365412	383162	471927	323620	268030	466481	555500	313974	200799	45511.6	61008.3	328591	408867	525106	317960	426115	475062
sp|P01086|IAAE_HORVU	TYVVSQIC[CAM]HQGP	694.835	2	y10	10.8503	1124.55	1	y	10	552982	404972	494973	395513	297802	410429	200452	129751	190357	321031	189175	192643	431544	407620	485516	418677	461107	294100	269345	221001	225983	297308	195533	159144	276599	344192	188065	127082	32002.1	38588.4	201827	243964	319229	187250	252839	287810
sp|P01086|IAAE_HORVU	TYVVSQIC[CAM]HQGP	694.835	2	b10	10.8503	1216.58	1	b	10	132675	98238.2	122733	98136	65307.7	101351	49424.9	27592.3	45624.9	81760.7	39331.2	39285.1	100441	104154	111697	98917.6	118163	69826.4	57923.2	51801.1	54863.6	71972.3	43038.4	32935.1	61875.2	81403.9	47641.5	36494	9824.96	18412	48290.1	54566.6	67602.5	47134.6	53180.4	61451.1
sp|P01086|IAAE_HORVU	TYVVSQIC[CAM]HQGP	694.835	2	y6	10.8503	711.324	1	y	6	507408	384364	484694	375237	254564	379469	179828	119916	162421	293650	161924	175947	385086	391169	445560	381880	426864	251001	217502	194976	196036	257650	163050	143544	246054	330813	203730	142745	38350.9	73651.5	170553	215700	308317	164297	228784	231412
sp|P01086|IAAE_HORVU	TYVVSQIC[CAM]HQGP	694.835	2	y7	10.8503	839.383	1	y	7	286343	202978	263649	193646	137702	204542	95739.2	52929.8	84351.1	172809	88508.9	90624.1	210712	201905	236645	194445	224242	130387	120024	103507	103867	131104	94655.4	67396.3	134020	178866	106404	73443.1	17598.6	36576.3	83678.7	110294	166252	81409.8	121794	141289
sp|P01086|IAAE_HORVU	TYVVSQIC[CAM]HQGPR	772.886	2	y9	9.06201	1082.52	1	y	9	898043	659889	1.0482e+06	720933	505000	720405	513448	267754	374199	908815	391912	435278	625528	673210	762820	645180	871653	371212	603159	599452	553189	784711	505269	384275	277779	567202	321890	197224	53746.2	56312.5	422368	767860	1.0798e+06	551240	895251	1.00348e+06
sp|P01086|IAAE_HORVU	TYVVSQIC[CAM]HQGPR	772.886	2	y10	9.06201	1181.58	1	y	10	584735	360005	622781	428658	289794	434965	326842	145816	213357	551291	225139	261997	400257	402398	431822	391076	548535	202904	377959	348310	326567	454558	313415	211895	159626	298631	166895	108789	28986.9	41870.3	247258	453872	605386	344162	542825	608393
sp|P01086|IAAE_HORVU	TYVVSQIC[CAM]HQGPR	772.886	2	y7	9.06201	867.425	1	y	7	412991	267454	462729	292608	219664	304710	234834	97295.9	152177	403512	161669	180584	288759	317782	309937	286759	400255	133244	264600	225419	229276	336894	209117	162826	118504	219852	133048	93739.6	22507.8	45115.2	179017	333678	461370	225299	372915	439816
sp|P01086|IAAE_HORVU	TYVVSQIC[CAM]HQGPR	772.886	2	y8	9.06201	995.484	1	y	8	284798	185353	306807	216462	147384	209064	150821	71118.7	98992.9	267031	115301	117817	200273	198500	222018	193104	272775	101132	180542	174059	153589	226802	145255	106083	73705.6	168641	90417.4	62064.8	15225.1	30659.4	118235	241620	328301	160638	280015	316040
sp|P01086|IAAE_HORVU	TYVVSQIC[CAM]HQGPR	772.886	2	y11	9.06201	1280.65	1	y	11	218086	142150	244175	157733	107089	158464	117873	54091.8	79792.2	209930	83588.9	94691.2	162231	161818	155417	145112	215483	85234.4	141910	129051	117016	192434	123977	83547.3	54104.6	120818	64131.5	45075	11755.5	25921.5	100136	172039	248052	124815	210519	238061
sp|P01086|IAAE_HORVU	TYVVSQIC[CAM]HQGPR	772.886	2	b10	9.06201	1216.58	1	b	10	48839.2	30628.8	52677.3	33031.5	0	34429	26384.1	13645.6	19173.9	0	0	0	34161.6	35088.3	36177	33607.7	0	18577	0	29459	0	43534.9	26686.4	16875.8	0	27182.5	16102.3	12717.7	3637.81	8211.72	0	0	56191	0	0	51118.8
sp|P01086|IAAE_HORVU	TYVVSQIC[CAM]HQG	646.309	2	y7	9.91587	829.362	1	y	7	1.13329e+06	786020	977567	699326	574126	758586	640223	392454	526675	824017	602987	495099	903734	803514	907558	824550	910162	572174	711033	561823	590134	747327	515896	430058	574692	682128	450252	292443	83809.6	80547.8	586005	652910	803374	503942	635537	732167
sp|P01086|IAAE_HORVU	TYVVSQIC[CAM]HQG	646.309	2	y8	9.91587	928.431	1	y	8	985877	676739	819697	603348	479196	651246	527524	332448	429272	722825	507232	425094	764543	683435	767994	694119	794133	484220	617679	483376	504646	618548	443984	365585	499319	576877	378199	242025	51369.9	82246.6	486396	540216	665294	429181	539240	624659
sp|P01086|IAAE_HORVU	TYVVSQIC[CAM]HQG	646.309	2	y9	9.91587	1027.5	1	y	9	789550	552891	667710	486058	381546	538584	412746	267056	348271	596540	397052	335281	603898	534498	612789	558951	643534	384334	460550	371724	400663	491312	338045	284391	391319	466057	284268	188669	51453	70650.2	378683	429111	526658	337849	422765	498153
sp|P01086|IAAE_HORVU	TYVVSQIC[CAM]HQG	646.309	2	b6	9.91587	678.346	1	b	6	63902.8	49362.1	73477	46952.4	46077.1	47402.5	33503.4	18837.3	38319.1	76586.9	38662.4	36803.6	52279.7	52734.6	61879	57317.1	64441.2	36386.5	44043.2	36843.8	41944.6	47905.7	31443.4	31670.6	32917.7	46887.6	36259.6	23528.8	7792.15	0	30721.8	42423.2	55246.5	37330.4	40374.3	47800.3
sp|P01086|IAAE_HORVU	TYVVSQIC[CAM]HQG	646.309	2	y10	9.91587	1190.56	1	y	10	0	0	0	0	0	0	0	0	0	0	0	0	0	0	0	0	0	0	0	0	0	0	0	0	0	0	0	0	0	0	0	0	0	0	0	0
sp|P01086|IAAE_HORVU	TYVVSQIC[CAM]HQG	646.309	2	y3	9.91587	341.157	1	y	3	627733	448199	606490	395559	306716	472634	303490	186086	253696	480439	294462	274821	479613	422056	513233	425859	542377	290830	325612	294814	304740	360522	249285	195980	258556	376094	296146	194964	61562.8	123775	262415	331793	447027	248561	330748	414522
sp|P01086|IAAE_HORVU	RC[CAM]C[CAM]DELSAIPAYC[CAM]R	590.929	3	y5	11.4188	666.303	1	y	5	2.30014e+06	1.76153e+06	2.30534e+06	1.92513e+06	1.74271e+06	1.74053e+06	1.51043e+06	1.01589e+06	1.26988e+06	1.90071e+06	1.33039e+06	1.29256e+06	2.10179e+06	2.10933e+06	2.18319e+06	1.91469e+06	2.09919e+06	1.47664e+06	1.59027e+06	1.79519e+06	1.72901e+06	2.01801e+06	1.68848e+06	1.38627e+06	1.38169e+06	1.80505e+06	1.49196e+06	1.0147e+06	213066	215062	1.53275e+06	2.12615e+06	2.3773e+06	1.74849e+06	2.04421e+06	2.01303e+06
sp|P01086|IAAE_HORVU	RC[CAM]C[CAM]DELSAIPAYC[CAM]R	590.929	3	b5	11.4188	721.239	1	b	5	512352	362984	548735	419772	329613	345624	319068	177648	249260	397595	233451	219204	560372	547669	570080	481291	552570	316860	371817	382668	389344	487447	364648	290182	279134	418291	312635	209592	43515.9	67345.4	325918	541586	632895	383616	523967	507303
sp|P01086|IAAE_HORVU	RC[CAM]C[CAM]DELSAIPAYC[CAM]R	590.929	3	b8	11.4188	992.392	1	b	8	759784	576599	800025	649906	571517	541333	544269	342616	424413	612594	405111	405848	820537	803489	852693	741508	821528	548238	607692	652228	643795	759074	627186	511342	481465	604922	443331	269933	57182.9	64069.4	555441	773790	898027	649326	785636	741994
sp|P01086|IAAE_HORVU	RC[CAM]C[CAM]DELSAIPAYC[CAM]R	590.929	3	b7	11.4188	921.355	1	b	7	177412	121646	185121	145269	113498	119292	107196	58507.8	84015.7	139073	77596.7	74567.1	189380	182441	196809	161998	193736	112350	121965	132263	134054	165213	122809	97639.1	84924.4	130305	89298.2	59588.2	13561.8	27560.2	108040	185705	229004	131635	175994	184076
sp|P01086|IAAE_HORVU	RC[CAM]C[CAM]DELSAIPAYC[CAM]R	590.929	3	b9	11.4188	1105.48	1	b	9	255956	185253	266374	214225	179167	176267	176223	103717	132105	199829	126096	128928	267067	272917	277868	240233	271624	169542	190495	212591	214981	245994	205346	163502	151629	189838	127577	85612.1	21139.7	32106.4	176168	264771	305875	210174	264203	259414
sp|P01086|IAAE_HORVU	RC[CAM]C[CAM]DELSAIPAYC[CAM]R	590.929	3	b6	11.4188	834.323	1	b	6	156857	108025	168530	127134	95561.1	105961	97715.3	56110.9	72071.2	117767	68165.2	67899.8	169981	169901	183227	140663	176092	100178	113786	118293	122154	147673	116246	88841.5	87087	121968	82750.3	61868.5	16389.7	27460.7	100097	156837	203413	119570	162104	158386
sp|P32936|IAAB_HORVU	SEDC[CAM]TPWTATPITPLPSC[CAM]R	1095	2	y14	18.9634	1596.82	1	y	14	1.35848e+06	959782	1.23078e+06	959250	684586	852641	531785	328904	535588	979528	515060	467473	699441	678490	764734	687054	813697	368857	465156	330815	324165	581768	366620	244395	465569	726627	304269	166379	44804.2	49349.7	455990	803204	938956	539623	765365	865251
sp|P32936|IAAB_HORVU	SEDC[CAM]TPWTATPITPLPSC[CAM]R	1095	2	y10	18.9634	1141.6	1	y	10	999401	662451	889230	697586	485949	605028	369976	219294	360986	670546	348233	321993	479276	466937	531288	481276	561583	237939	291271	218551	203223	400382	242000	164450	332099	516413	230701	151235	45216.6	46691.1	315101	537627	644688	375425	543939	620239
sp|P32936|IAAB_HORVU	SEDC[CAM]TPWTATPITPLPSC[CAM]R	1095	2	y11	18.9634	1212.64	1	y	11	907313	599580	837655	622628	442491	564912	323845	192619	318875	642430	325928	285815	440851	424540	496870	420764	541806	213531	263650	190829	188017	369205	214281	148725	287610	467678	209439	124804	42046.7	46640.2	288289	519685	588569	343744	505749	578937
sp|P32936|IAAB_HORVU	SEDC[CAM]TPWTATPITPLPSC[CAM]R	1095	2	b10	18.9634	1149.45	1	b	10	185499	137857	169633	143056	102443	124118	82248.9	48306.6	80711.1	138884	72812.4	72648.3	100060	102293	113897	105069	117281	58618.4	68457.4	52882	47277.5	89806	53848.9	39823.9	74203.3	105661	58125.7	37584.7	12773.3	18406.9	67775.7	113939	130222	79169	110065	124364
sp|P32936|IAAB_HORVU	SEDC[CAM]TPWTATPITPLPSC[CAM]R	1095	2	y12	18.9634	1313.69	1	y	12	802293	509887	732191	538015	361857	484861	284987	160248	272349	545899	252464	248602	373464	349883	414027	375345	456448	187385	223731	163225	161524	295975	183437	121565	251569	392341	175072	110346	30444.6	37098.2	234644	428891	523166	288137	424907	484447
sp|P32936|IAAB_HORVU	SEDC[CAM]TPWTATPITPLPSC[CAM]R	1095	2	b13	18.9634	1460.64	1	b	13	0	0	0	0	0	0	0	0	0	0	0	0	0	0	0	0	0	0	26300.9	17879.3	17648.1	29241.4	19456.9	0	0	0	18915.3	13296.3	5358.96	7567.21	27343.7	0	0	0	0	0
sp|P32936|IAAB_HORVU	VGSEDC[CAM]TPWTATPITPLPSC[CAM]R	1173.05	2	y14	19.3105	1596.82	1	y	14	1.25396e+06	756997	1.07962e+06	750607	576234	793906	649352	363266	560241	1.20031e+06	630822	463259	343761	308086	426220	359500	489020	148937	402084	362967	201783	472085	275584	192949	343528	425968	148492	95628.4	26890.3	31509.8	532912	575350	1.0312e+06	391253	492329	732787
sp|P32936|IAAB_HORVU	VGSEDC[CAM]TPWTATPITPLPSC[CAM]R	1173.05	2	b12	19.3105	1305.54	1	b	12	113801	69075.7	108450	71306.3	53428.5	76628.8	57400.7	37786	52528.4	113198	60911.3	43817.9	34608.8	31978	42186.5	38770.6	47665.2	16988.7	36559.8	35774.6	22459.6	49168.1	26871.1	21171	32687	45553	21176.3	15326.2	6453.49	9262.22	53103.1	54837.7	100542	37526.5	50349.5	72353.1
sp|P32936|IAAB_HORVU	VGSEDC[CAM]TPWTATPITPLPSC[CAM]R	1173.05	2	y11	19.3105	1212.64	1	y	11	536731	301010	460513	296079	230724	314535	243033	136549	219660	507549	260178	175759	130940	116901	152507	126391	183823	55561.2	150117	127636	72487.7	171201	98558.9	68642.5	122372	171284	63833.7	49344.4	16164.3	23654.7	193408	223317	416033	143550	189230	283111
sp|P32936|IAAB_HORVU	VGSEDC[CAM]TPWTATPITPLPSC[CAM]R	1173.05	2	y12	19.3105	1313.69	1	y	12	454371	245947	375495	262343	192039	255551	208127	123428	190125	429627	206666	144961	109356	95832	128669	103716	160799	46009.5	121165	106033	63721.8	143629	82340.6	57754.9	103562	136813	54881.3	39551	14034.4	16615.8	169454	183951	338572	118623	155540	245492
sp|P32936|IAAB_HORVU	VGSEDC[CAM]TPWTATPITPLPSC[CAM]R	1173.05	2	b11	19.3105	1204.49	1	b	11	69895.4	37280.8	56653	44124.2	29532.7	38422	34095.8	20400.4	29682.5	67213.6	35543.2	22169.6	19976.2	17823.6	20560.8	20058.7	28844.9	7810.42	0	19296.7	0	23098.5	16270.7	11057	21202.9	30220.3	11254.1	8698.45	3261.2	6151.89	25618.2	0	52050.5	21282.7	25087	37923
sp|P32936|IAAB_HORVU	VGSEDC[CAM]TPWTATPITPLPSC[CAM]R	1173.05	2	b15	19.3105	1616.73	1	b	15	0	0	0	0	0	0	0	0	0	0	0	0	0	0	0	0	0	0	0	0	0	0	0	0	0	0	0	0	2145.63	2628.7	0	0	0	0	0	0
sp|P32936|IAAB_HORVU	ILVTPGFC[CAM]NLT	617.829	2	y7	21.0617	808.366	1	y	7	629997	552682	616044	673266	582534	706197	239046	171512	218166	467695	333236	319273	550911	568984	558931	702812	762166	526064	349400	274338	261432	485532	400750	304674	393663	459279	283199	261926	79563.5	106515	256303	306321	378309	410738	419726	479179
sp|P32936|IAAB_HORVU	ILVTPGFC[CAM]NLT	617.829	2	b9	21.0617	1002.51	1	b	9	250901	205703	228708	285823	231688	264844	72386	49505.6	66030.4	169789	107172	105089	214557	210355	209056	305390	298549	206384	120654	88828.3	79148.2	182678	128995	104272	134239	162901	89600.5	95338.5	28468.9	45055.6	76966.3	95018	117566	150079	160029	180297
sp|P32936|IAAB_HORVU	ILVTPGFC[CAM]NLT	617.829	2	b7	21.0617	728.434	1	b	7	122213	99551.7	125512	155445	124137	143628	37064.4	23035.7	31634.9	84086.7	52855.9	50298.4	114020	109436	102691	158424	166277	96546.1	58932.5	44328.2	41747.3	84503.6	61392.9	47479.8	63609.8	80087.8	50357.9	66949.5	22965.7	31899.7	37203.7	44527.5	58052	72296.9	73968	88330.6
sp|P32936|IAAB_HORVU	ILVTPGFC[CAM]NLT	617.829	2	b10	21.0617	1115.59	1	b	10	99914.4	88023.1	97841.6	120549	93627.6	111858	29631.3	20160.5	24115.3	68681.5	44919.4	44281.2	86164.4	92193.9	86416.1	127277	133397	85996.2	49429.4	39250.7	33426.9	74903.9	54162.5	39205.5	53924.2	66495.8	37906	42574	16127	21815.7	31366	37266	45866.9	56342.1	60830.5	76335.7
sp|P32936|IAAB_HORVU	ILVTPGFC[CAM]NLT	617.829	2	y10	21.0617	1121.57	1	y	10	0	0	0	0	0	0	0	0	0	0	0	0	0	0	0	0	0	0	0	0	0	0	0	0	0	0	0	0	0	0	0	0	0	0	0	0
sp|P32936|IAAB_HORVU	ILVTPGFC[CAM]NLT	617.829	2	b4	21.0617	427.292	1	b	4	449582	374091	449623	530174	453809	503872	148507	105331	127448	335523	213504	214988	382251	403919	409649	514376	544505	376167	232046	171801	164985	322329	236924	185205	251855	345099	247594	270739	110263	129781	153899	194094	229880	273195	288997	324276
sp|P32936|IAAB_HORVU	GSEDC[CAM]TPWTATPITPLPSC[CAM]R	1123.51	2	y14	19.1267	1596.82	1	y	14	461702	285506	393775	294107	192090	271367	144638	90650.8	144334	307430	141660	88118.6	214157	190242	230281	196908	231007	98314.6	122984	96523.3	91509	158313	104325	74492	107411	165626	83693.5	53839.9	789.428	6797.38	97641.8	189017	100783	110995	184692	218400
sp|P32936|IAAB_HORVU	GSEDC[CAM]TPWTATPITPLPSC[CAM]R	1123.51	2	y10	19.1267	1141.6	1	y	10	247170	144720	198939	157043	100753	139525	73980.4	44565.6	71458.7	156628	74895.5	47179.9	110938	100583	119537	101525	134855	52231.6	65095.1	45264.1	45550.4	80995.6	52114.8	35950	58097.8	89649	50089.7	34228.5	783.021	4101.97	53946.9	96042.4	53474.3	58893.7	97054.2	108608
sp|P32936|IAAB_HORVU	GSEDC[CAM]TPWTATPITPLPSC[CAM]R	1123.51	2	b11	19.1267	1206.47	1	b	11	51879.8	29949.9	40765.6	33266.3	23756.3	29115.3	16523.8	10034.1	14892.1	31779.3	14893.5	10202.6	28456.7	22656.2	27605.7	22663.8	32134.2	10105.5	17130.1	9782.42	9629.12	20548.1	12242.3	8489.85	12594.4	19781.6	12546.7	8643.38	489.673	0	10192.9	23229.8	10915.3	13282.5	19433.9	24827.6
sp|P32936|IAAB_HORVU	GSEDC[CAM]TPWTATPITPLPSC[CAM]R	1123.51	2	y11	19.1267	1212.64	1	y	11	219023	121863	177373	122244	85242.2	120451	63398.5	39334.5	60154	135173	59204.4	39026.3	93879.7	82088.4	98579.9	87476.9	107656	44918.2	53949.6	36552	38433.3	72855.9	44844.7	32063.7	51082.7	76889.2	41529.1	29102.6	361.906	4171.31	44494.9	83414.1	43630.3	47490.4	82307.5	99723.3
sp|P32936|IAAB_HORVU	GSEDC[CAM]TPWTATPITPLPSC[CAM]R	1123.51	2	y12	19.1267	1313.69	1	y	12	177824	103096	146191	112187	74870.9	106575	52471.6	35617.7	51996.1	114227	52720.5	36472.6	80905	72759.1	88843.9	67860.8	96421.4	38982.7	48926.8	31262	33313.3	57387.3	39189.9	27220.4	43161.8	66714.9	36355.9	27292.6	0	3667.47	34984.5	74103.5	40803	40672.1	70959	84579.6
sp|P32936|IAAB_HORVU	GSEDC[CAM]TPWTATPITPLPSC[CAM]R	1123.51	2	b16	19.1267	1727.79	1	b	16	0	0	0	0	0	0	0	0	0	0	0	0	0	0	0	0	0	0	0	0	0	0	0	0	0	0	0	0	474.411	0	0	0	0	0	0	0
sp|P32936|IAAB_HORVU	ILVTPGFC[CAM]NLTTVHNTPYC[CAM]LA	797.733	3	b19	23.0538	1095.03	2	b	19	49355.5	38026	49970	52942.4	37556.8	39305	11631.8	7417.76	9072.59	22621.7	9101.53	13533.7	38026.5	38634.1	35725.8	41900.6	44762.3	26055.4	19681.7	18035.1	12557.7	28261.7	17122.3	15528.3	22452	28977.1	15531.4	12470.7	5448.74	5056.21	10213.4	17349.4	18639.2	17746.2	21261.4	25868.5
sp|P32936|IAAB_HORVU	ILVTPGFC[CAM]NLTTVHNTPYC[CAM]LA	797.733	3	b16	23.0538	884.956	2	b	16	57564.1	42375	54834.3	54647.7	46464.3	47427.1	17293.8	11005.9	11920	26095.5	13364.8	13868	41841.2	44174	45587.8	51446.8	48525.1	28356.5	21892	18491.9	13355	28487.9	21340.7	16793.8	26369.6	32732.3	18600.4	18598.8	7905.46	6762.65	14503.3	21995	21020.6	22155.2	25840.3	33091.9
sp|P32936|IAAB_HORVU	ILVTPGFC[CAM]NLTTVHNTPYC[CAM]LA	797.733	3	b18	23.0538	1015.01	2	b	18	40041.1	29001.4	38068.6	37982.4	27604.6	30216.7	10133.7	5274.82	6981.43	14688.8	7559.31	9585.09	26506.6	29134.9	28470	34843.6	32643.1	20845.8	14783.3	11220.4	8977.47	20482.1	11762.5	9942.72	15561.6	21414.6	11243	9113.47	4755.04	4898.72	7166.24	12730.8	14543.2	11628.5	17035.1	19324.4
sp|P32936|IAAB_HORVU	ILVTPGFC[CAM]NLTTVHNTPYC[CAM]LA	797.733	3	y17	23.0538	982.953	2	y	17	29594	20938.7	31457.1	33322.7	29506.5	25840.5	8266.89	4216.99	5708.21	12777.6	7338.14	6418.38	23560.3	23260.4	23663.5	27114.8	27410.3	15987.9	10741.4	10760.8	8693.92	15169.7	9766.8	8595.2	11239.6	17423.9	8897.74	7695.02	3543.38	3283.35	7307.73	10279.6	12050.9	11820	13116.7	15060.8
sp|P32936|IAAB_HORVU	ILVTPGFC[CAM]NLTTVHNTPYC[CAM]LA	797.733	3	y18	23.0538	1033.48	2	y	18	13918.1	8274.27	14796.2	13061	9428.94	7657.63	6729.82	748.772	4941.3	3642.82	4382.98	2171.72	12650.7	10360.3	9246.44	15288.7	13784.6	5989.01	8919.28	7193.36	5197.8	10680.1	5039.71	4459.48	4882.6	6085.29	2728.5	5234.75	3189.57	3158.05	4424.84	7450.32	0	5973.9	6567.89	8429.27
sp|P32936|IAAB_HORVU	ILVTPGFC[CAM]NLTTVHNTPYC[CAM]LA	797.733	3	y9	23.0538	1074.5	1	y	9	46635.2	38654.7	45208.8	44150.6	31613.3	35409.4	31723.3	20219.6	0	40655	0	24337.9	30021.4	32572.3	30811.4	29801.4	30413.5	19472.4	16311.4	18045.2	15295.8	27194.1	10348.5	12522.1	25026.8	32524.7	20100.4	20624.4	12542.2	14116.5	0	0	0	11898.9	28028.1	29629.3
sp|P32936|IAAB_HORVU	DC[CAM]TPWTATPITPLPSC[CAM]R	986.966	2	y9	19.3331	1040.56	1	y	9	492051	389544	414083	318679	213899	316446	343790	187499	294485	594187	286332	270678	139830	171211	184306	121558	175975	67266.6	129594	121991	119809	177992	117760	90684.2	134188	220110	114026	64201.7	26582.2	39650.6	220429	270017	458822	244845	321158	410135
sp|P32936|IAAB_HORVU	DC[CAM]TPWTATPITPLPSC[CAM]R	986.966	2	y10	19.3331	1141.6	1	y	10	150290	122771	128790	105182	68765	103720	114935	58510.3	93959.7	199224	91873	82041.4	41106.4	53934.2	58917.9	38612.1	57186.1	21835.4	36458.7	36755.8	39363.2	59673.1	41296.7	31731.7	40356.5	66604.9	33538.7	21948.8	9245.62	14093.6	70166.8	84694.8	139461	73920	102125	130091
sp|P32936|IAAB_HORVU	DC[CAM]TPWTATPITPLPSC[CAM]R	986.966	2	y11	19.3331	1212.64	1	y	11	119637	94014.1	97147.6	81223.5	52831.6	75796.1	84750.4	46029.7	75093.1	154646	72711.2	71346.8	32478	42338.1	42386.9	28118.7	42348.2	16718.4	30396.2	27595.4	29545	46984.5	31365.3	23820.4	32777.8	52635.2	25759.4	19698.9	9253.03	13060.7	55291	67249.2	114007	58184.2	77138.8	105967
sp|P32936|IAAB_HORVU	DC[CAM]TPWTATPITPLPSC[CAM]R	986.966	2	y12	19.3331	1313.69	1	y	12	101542	83987.7	86136.6	70945	44577.3	67961.6	75213	38826.3	61562.4	135364	57575.7	60808.6	28445.8	37481.1	38614.3	26840.8	37119.6	16070.5	29325	24399.5	26944.6	37631.7	27888	20590.2	31126.3	44816.4	22161.2	15234.2	5336.86	9254.77	46393.9	54880	97748.8	51713.2	69445.8	89178.2
sp|P32936|IAAB_HORVU	DC[CAM]TPWTATPITPLPSC[CAM]R	986.966	2	y14	19.3331	1596.82	1	y	14	67116.6	50333.5	55324.1	44414.6	28656.6	48260.7	48411.5	26101.9	43236.8	86229.2	39752.5	35385.1	18535.2	24671.9	24446	20520.8	25971.3	12046.8	19188.4	16882.2	15167.2	25481.5	18346.6	14260.3	18753	34473.6	15551	11199.2	3849.57	8210.21	31715.1	42725.1	62498.5	33769.3	43452.9	58175.8
sp|P32936|IAAB_HORVU	DC[CAM]TPWTATPITPLPSC[CAM]R	986.966	2	b13	19.3331	1454.7	1	b	13	0	0	0	0	0	0	0	0	0	0	0	0	0	0	0	0	0	0	0	0	0	0	0	0	0	0	0	0	0	0	0	0	0	0	0	0
tr|M0V3U0|M0V3U0_HORVD	GIHNLNLNNAASIPSK	554.969	3	b6	11.9764	649.342	1	b	6	1.73315e+06	1.76272e+06	416033	1.84748e+06	1.61631e+06	1.81627e+06	1.44028e+06	1.41749e+06	1.68269e+06	1.79816e+06	1.56154e+06	1.78804e+06	1.81356e+06	1.56702e+06	1.76327e+06	1.9289e+06	1.92911e+06	1.44896e+06	2.217e+06	1.23603e+06	1.41249e+06	1.74314e+06	1.48952e+06	1.12676e+06	1.34197e+06	1.2297e+06	915367	574347	222805	154910	1.25396e+06	1.12603e+06	1.53185e+06	1.11901e+06	1.00855e+06	1.21977e+06
tr|M0V3U0|M0V3U0_HORVD	GIHNLNLNNAASIPSK	554.969	3	y6	11.9764	602.351	1	y	6	2.83897e+06	2.79691e+06	1.39101e+06	2.85821e+06	2.6035e+06	2.68038e+06	2.50344e+06	2.56221e+06	2.8152e+06	2.76726e+06	2.67214e+06	2.68304e+06	3.05977e+06	2.67058e+06	3.00958e+06	3.0544e+06	3.16949e+06	2.62107e+06	3.7587e+06	2.16339e+06	2.49267e+06	2.94816e+06	2.56878e+06	2.15746e+06	2.35201e+06	2.1105e+06	1.77675e+06	1.08553e+06	352042	226653	2.25446e+06	2.05671e+06	2.16142e+06	2.01408e+06	1.71029e+06	2.18997e+06
tr|M0V3U0|M0V3U0_HORVD	GIHNLNLNNAASIPSK	554.969	3	b7	11.9764	762.426	1	b	7	1.06962e+06	1.0901e+06	238243	1.13095e+06	953028	1.08693e+06	841299	835785	983395	1.11512e+06	928697	1.0744e+06	1.1135e+06	958995	1.09051e+06	1.21209e+06	1.21345e+06	877426	1.41134e+06	713738	818865	1.07929e+06	922335	677584	747125	684644	479111	282701	117403	85467.8	725076	649633	899459	643013	572746	729600
tr|M0V3U0|M0V3U0_HORVD	GIHNLNLNNAASIPSK	554.969	3	y7	11.9764	673.388	1	y	7	1.7979e+06	1.74093e+06	367993	1.81188e+06	1.60037e+06	1.7236e+06	1.46212e+06	1.4965e+06	1.71107e+06	1.8126e+06	1.61278e+06	1.64466e+06	1.90262e+06	1.65719e+06	1.87046e+06	1.96014e+06	2.03758e+06	1.55103e+06	2.41303e+06	1.32638e+06	1.51667e+06	1.8154e+06	1.53817e+06	1.23969e+06	1.30832e+06	1.17119e+06	953453	533312	210920	139448	1.24169e+06	1.14747e+06	1.26425e+06	1.1166e+06	946727	1.24448e+06
tr|M0V3U0|M0V3U0_HORVD	GIHNLNLNNAASIPSK	554.969	3	y8	11.9764	787.431	1	y	8	1.23976e+06	1.23636e+06	184501	1.25949e+06	1.1158e+06	1.18524e+06	1.03913e+06	1.05358e+06	1.17108e+06	1.23198e+06	1.12808e+06	1.16827e+06	1.33518e+06	1.13457e+06	1.30556e+06	1.3787e+06	1.37749e+06	1.07222e+06	1.73719e+06	889295	1.07312e+06	1.28517e+06	1.10227e+06	877356	926308	801670	612405	345242	123836	92553.5	862530	790171	892418	777215	684831	880401
tr|M0V3U0|M0V3U0_HORVD	GIHNLNLNNAASIPSK	554.969	3	b8	11.9764	876.469	1	b	8	654433	653344	100573	693902	577524	666402	519154	529746	604276	665081	570295	660312	684656	588542	679571	737439	754870	556015	871916	447551	526450	660130	575256	419355	465325	393497	291674	177254	70661.3	62215	447193	399269	556125	394512	360417	462350
tr|M0V3U0|M0V3U0_HORVD	C[CAM]NVNVPYTISPDIDC[CAM]SR	1005.46	2	y12	16.3353	1423.65	1	y	12	3.68458e+06	2.913e+06	2.79263e+06	3.11061e+06	2.44119e+06	3.06097e+06	2.53705e+06	2.33829e+06	3.05847e+06	3.88576e+06	2.90415e+06	2.65449e+06	3.50366e+06	2.85719e+06	3.21539e+06	3.88265e+06	4.01286e+06	2.39943e+06	4.77637e+06	2.02032e+06	2.29848e+06	3.08008e+06	2.75776e+06	1.63698e+06	1.93298e+06	1.80802e+06	936369	366039	63864.2	66997.9	1.83086e+06	1.92001e+06	2.27705e+06	1.64591e+06	1.77359e+06	2.18647e+06
tr|M0V3U0|M0V3U0_HORVD	C[CAM]NVNVPYTISPDIDC[CAM]SR	1005.46	2	b9	16.3353	1061.51	1	b	9	150300	134446	0	151375	0	132816	0	0	126800	172630	124609	0	162773	111363	156417	169300	169874	0	263196	0	0	140634	0	0	0	0	0	22137.3	7091.78	12071.6	0	0	0	0	0	0
tr|M0V3U0|M0V3U0_HORVD	C[CAM]NVNVPYTISPDIDC[CAM]SR	1005.46	2	y14	16.3353	1636.76	1	y	14	538630	456818	362960	489284	328911	416867	324635	299734	446228	597383	393883	377828	543793	361375	524793	577181	599206	318160	939423	247950	314884	460003	351008	184608	198200	178717	94977.7	42878.8	13693.2	24941.5	204806	219369	272344	160328	207454	288637
tr|M0V3U0|M0V3U0_HORVD	C[CAM]NVNVPYTISPDIDC[CAM]SR	1005.46	2	y10	16.3353	1163.54	1	y	10	803713	644794	517142	700035	462810	629401	436936	393806	640757	858365	564514	525860	772130	497702	729294	806059	880610	433276	1.32286e+06	338445	416960	655234	471906	247137	271917	273499	150791	63447.2	17786.6	35728	273457	297780	375254	216438	259385	398679
tr|M0V3U0|M0V3U0_HORVD	C[CAM]NVNVPYTISPDIDC[CAM]SR	1005.46	2	y13	16.3353	1522.72	1	y	13	429925	370279	293490	380136	256240	337499	252508	222040	350339	458341	319159	296086	423625	290089	395777	450082	477180	246219	760389	191595	223379	381423	271623	142724	148092	139532	70638.3	38346.3	12804.9	22103.1	146730	172593	220602	119937	153255	215012
tr|M0V3U0|M0V3U0_HORVD	C[CAM]NVNVPYTISPDIDC[CAM]SR	1005.46	2	y9	16.3353	1062.49	1	y	9	760308	640845	519290	700501	459500	635268	436764	403725	592162	837129	547971	527385	771519	502327	710852	809902	849550	433712	1.30095e+06	318053	400746	633666	470876	248049	267028	246298	144646	61667.7	17791.1	28367.3	253497	300085	357801	210132	260823	392481
tr|M0V3U0|M0V3U0_HORVD	C[CAM]NVNVPYTISPDIDC[CAM]SRI	1062	2	y13	19.2999	1536.74	1	y	13	1.16944e+06	1.00959e+06	919603	1.07894e+06	736083	1.05785e+06	706578	705876	954881	1.23232e+06	856640	794458	1.19545e+06	880453	1.12098e+06	1.20922e+06	1.31089e+06	758032	1.87064e+06	613101	713841	1.03798e+06	822946	469211	529804	485368	216616	101439	1497.34	34865.2	535854	579402	690034	411564	467036	706336
tr|M0V3U0|M0V3U0_HORVD	C[CAM]NVNVPYTISPDIDC[CAM]SRI	1062	2	y11	19.2999	1276.62	1	y	11	148589	124899	105758	131597	79133.7	128765	70582.2	67690.2	106908	160050	103909	88728.8	148075	86299.2	139169	152068	179294	83102	300480	62027.8	72141.5	115523	86990.1	41898.9	51799.4	48216.2	29123.1	14698.7	725.205	10042.4	54701.5	54384.6	68208.8	37936.8	44148.9	65806.2
tr|M0V3U0|M0V3U0_HORVD	C[CAM]NVNVPYTISPDIDC[CAM]SRI	1062	2	y10	19.2999	1175.57	1	y	10	137940	98291.1	88603.1	122801	69166.9	111110	64656.7	64333.2	91608.8	138565	87291.2	79789.2	135768	80235	118452	135956	154772	73074.9	260241	52856.1	64956.8	109096	78772.1	37292.6	51463.9	42648.4	26199.1	15319	894.32	10087.4	45906.8	47142.3	63594.4	34344.7	37331	65929.1
tr|M0V3U0|M0V3U0_HORVD	C[CAM]NVNVPYTISPDIDC[CAM]SRI	1062	2	y15	19.2999	1749.85	1	y	15	102491	80641.5	71484.6	91940.8	58015.4	91490.8	51546.2	51017.5	68494.9	109774	65361.3	64450.4	110195	62049.2	94651.3	102559	119557	59540.5	200135	41820	53511.4	87683.1	63206.4	30457	38825.1	33172.2	19962.1	11174.3	763.289	8102.72	37106.7	40957.9	45508	24452.4	30130	48584.4
tr|M0V3U0|M0V3U0_HORVD	C[CAM]NVNVPYTISPDIDC[CAM]SRI	1062	2	y14	19.2999	1635.8	1	y	14	75123	64284.7	57736.4	75591.2	49337.5	70181.7	39998.6	42384.9	55924.2	83289	54546.7	47927.7	82063.4	52389.5	80138.7	87894.3	99497.7	40229.8	170015	35516.8	41687.8	77742.3	47749.1	25199.1	30599.2	33811.9	15905.1	9888.13	316.974	7657.72	28015.2	32231.1	39637.9	21210.2	27855.8	40529.9
tr|M0V3U0|M0V3U0_HORVD	C[CAM]NVNVPYTISPDIDC[CAM]SRI	1062	2	b10	19.2999	1148.54	1	b	10	0	0	0	0	0	0	0	0	0	0	0	0	0	0	0	0	0	0	0	0	0	0	0	0	0	0	0	0	549.888	2437.13	0	0	0	0	0	0
tr|M0V3U0|M0V3U0_HORVD	DLHNQAQSSGDRQTVC[CAM]NC[CAM]LK	777.69	3	y17	7.64777	983.447	2	y	17	81693.2	35207.4	66085.4	59061.3	38600.3	56452.2	39830.6	32359.1	48459.7	69688.5	47840.3	44262.2	149188	48902.9	88113.6	121381	120689	63296.3	154843	49913.4	61598.5	93497	72361.4	33598.9	37427.5	38145.3	20588.5	11554.5	1509.45	11154.1	37064	46694.4	61714.3	31825.7	37323.4	48818.9
tr|M0V3U0|M0V3U0_HORVD	DLHNQAQSSGDRQTVC[CAM]NC[CAM]LK	777.69	3	y15	7.64777	862.396	2	y	15	44843	16178.6	30330.3	28228.6	19116.6	24558.2	15551.7	16946.6	22961	37502	19698.6	21249.3	69565.5	21789.6	51307.1	65845.9	65754.3	35175.2	78117.1	27537.7	26360.5	50800.4	31102.6	15596.1	21437.1	18000.5	9623.22	6112.09	732.158	3340.24	15642.2	23311.6	25676.9	12704.3	15518.5	25556.5
tr|M0V3U0|M0V3U0_HORVD	DLHNQAQSSGDRQTVC[CAM]NC[CAM]LK	777.69	3	y16	7.64777	926.425	2	y	16	32383	13805	30880.1	24859.5	12857.8	25515.9	15844.5	13948.2	20053.7	24522.8	14916	14181.6	70223	19717	45524.8	62341.7	52480.3	23450.6	74682.9	23100.4	23750.7	45097.7	32679	13825.1	14549.8	18126.4	8819.58	4924.21	1216.39	5530.18	15266.9	18594.6	21445	11891.2	13744.3	18350.4
tr|M0V3U0|M0V3U0_HORVD	DLHNQAQSSGDRQTVC[CAM]NC[CAM]LK	777.69	3	y9	7.64777	1178.58	1	y	9	11602.8	5181.73	8113.12	8787.96	3814.37	8730.54	4277.13	5430.18	7290.97	11799	8335.68	5489.06	17893	6428.91	12865.3	19847.7	16784.7	8499.02	27472.5	6799.12	7047.01	12442.9	7134.13	5487.39	4193.08	4942.8	2513.62	2220.09	384.568	4196.97	5645.39	6174.76	8706.4	2938.13	3693.79	5679.53
tr|M0V3U0|M0V3U0_HORVD	DLHNQAQSSGDRQTVC[CAM]NC[CAM]LK	777.69	3	y18	7.64777	1051.98	2	y	18	20077.5	7129.17	12957.1	13149.3	5823.17	10727.5	6908.62	8331.34	10757.8	15082.1	8861.18	8588.73	32476.4	11512.9	0	26119	31964.5	14968.2	37148.2	8517.78	13982	21174.7	14240.3	6220.28	6745.93	7981.05	4507.45	0	443.72	3186.15	7402.33	9102.86	7514.69	5655.16	6547.52	7845.93
tr|M0V3U0|M0V3U0_HORVD	DLHNQAQSSGDRQTVC[CAM]NC[CAM]LK	777.69	3	b7	7.64777	807.374	1	b	7	13252.4	4941.81	11175	12996.5	4953.1	14188.4	7177.11	5464.74	8474.05	11121.3	11274.4	9554.8	24154.1	12822.5	18549.7	25192.1	23033.9	12136.4	30692.4	8604.3	10331.5	16050.5	13376.7	6257.28	8816.38	6146.76	5513.55	1830.9	626.921	3884.41	6639.75	7623.65	9805.97	3846.73	7218.73	8829.34
tr|M0V3U0|M0V3U0_HORVD	GIHNLNLNNAASIPSKC[CAM]NVNVPYTISPDIDC[CAM]SR	914.2	4	y30	18.7158	1116.21	3	y	30	0	0	0	0	0	0	0	0	0	0	0	0	0	0	0	0	0	0	0	0	0	0	0	0	0	0	0	2155.9	0	360.178	0	0	0	0	0	0
tr|M0V3U0|M0V3U0_HORVD	GIHNLNLNNAASIPSKC[CAM]NVNVPYTISPDIDC[CAM]SR	914.2	4	y12	18.7158	1423.65	1	y	12	101219	88843.4	83673.2	101713	99659.8	98698.5	51684.7	60735.1	70627.2	114188	85463.7	101773	236352	46901.7	83943.2	165780	127418	89197.3	141991	68607	71387.4	129881	109398	63085.3	84322.5	65930.9	24470.5	30768.7	6605.37	343.111	93762.3	154103	91032.1	103818	75111	95988.2
tr|M0V3U0|M0V3U0_HORVD	GIHNLNLNNAASIPSKC[CAM]NVNVPYTISPDIDC[CAM]SR	914.2	4	y8	18.7158	949.404	1	y	8	128030	124850	105374	133848	125564	130146	73310.5	83104.1	128449	145150	160626	123656	312291	54406.2	120938	221440	162743	115659	173964	85009.1	96176.1	170648	140238	75381.1	119438	92425.7	33944.2	37714.7	11786.7	678.036	115631	205183	119785	116470	97581.5	126033
tr|M0V3U0|M0V3U0_HORVD	GIHNLNLNNAASIPSKC[CAM]NVNVPYTISPDIDC[CAM]SR	914.2	4	y24	18.7158	1332.64	2	y	24	33087.4	35388.2	27694.1	32967	33632.5	33226.5	17015.4	27269.3	28204.2	28434.1	42479	44272.7	50805.6	27680	31786.7	40466.7	34299.1	28631.8	0	17457	20111.8	39551.8	39839.3	18786.4	15886.9	14244.7	5829.5	0	0	458.222	24574.8	31523.9	22345	28204.8	25954.7	28176.4
tr|M0V3U0|M0V3U0_HORVD	GIHNLNLNNAASIPSKC[CAM]NVNVPYTISPDIDC[CAM]SR	914.2	4	y10	18.7158	1163.54	1	y	10	71728.5	61610.6	67761.5	62864	57890	57453.8	36994.1	30132.4	50026.7	72213.1	54003.5	45287.5	141765	53172.2	69890	104539	89844.3	62110.4	83165.4	59204	57506.8	92142.5	71610.5	44619.4	54295.2	54254.1	24594.3	23386.6	5766.35	0	57100.2	101070	54316.2	60500.3	56012.1	69015.9
tr|M0V3U0|M0V3U0_HORVD	GIHNLNLNNAASIPSKC[CAM]NVNVPYTISPDIDC[CAM]SR	914.2	4	y9	18.7158	1062.49	1	y	9	50708.9	42353.8	45772.3	47812.5	44517.1	57139.1	25410.5	31849.6	34046.6	65246.7	39725.8	47350.8	108691	25947.9	37142.6	87191.4	65515.6	41380.7	64614.8	33774.7	35156.4	65646.9	52775.2	30476.3	46855.5	44773.2	14567.7	15313.3	3901.1	575.679	48951	75970.9	43994.2	42029.8	38678.7	53269.4
tr|M0V3U0|M0V3U0_HORVD	DLHNQAQSSGDRQTVC[CAM]NC[CAM]LKG	796.698	3	y18	7.64777	1011.96	2	y	18	3908.04	1733.44	3308.04	3484.73	1192.12	3852.8	1515.86	1948.73	3307.62	5117.78	3012.29	2210.55	11023	4221.33	5388.28	7014.72	8442.86	4446.25	16952.8	2546.51	3026.2	5616.86	4204.78	1984.75	1522.69	2101.83	2205.37	394.283	244.525	313.874	2286.78	1755.93	1638.1	1151.98	1912.72	2074.4
tr|M0V3U0|M0V3U0_HORVD	DLHNQAQSSGDRQTVC[CAM]NC[CAM]LKG	796.698	3	b7	7.64777	807.374	1	b	7	13252.4	4941.81	11175	12996.5	4953.1	14188.4	7177.11	5464.74	8474.05	11121.3	11274.4	9554.8	24154.1	12822.5	18549.7	25192.1	23033.9	12136.4	30692.4	8604.3	10331.5	16050.5	13376.7	6257.28	8816.38	6146.76	5513.55	0	467.806	2541.98	6639.75	7623.65	9805.97	3846.73	7218.73	8829.34
tr|M0V3U0|M0V3U0_HORVD	DLHNQAQSSGDRQTVC[CAM]NC[CAM]LKG	796.698	3	y16	7.64777	890.907	2	y	16	4007.62	2738.24	3021.11	3467.67	1757.64	4113.94	3134.47	1840.91	2426.12	5762.32	3261.99	2373.9	9058.36	3331.48	5671.11	8710.07	7562.28	2653.96	14555.1	3238	3491.2	5023.73	4096.63	2188.62	2298.82	3544.67	1391.27	0	76.1393	0	1351.02	2618.67	1917.29	1776.81	1484.42	1777.5
tr|M0V3U0|M0V3U0_HORVD	DLHNQAQSSGDRQTVC[CAM]NC[CAM]LKG	796.698	3	y17	7.64777	954.936	2	y	17	2016.55	1062.24	1845.27	860.545	371.979	2072.42	1130.95	841.219	1328.06	1885.06	1720.04	849.445	4722.8	2000.35	1992	3392.94	3445.97	1880.74	7520.64	1613.35	1756.42	2723.66	1451.14	993.461	929.15	2260.3	642.952	116.513	114.301	0	777.031	1158.84	773.642	500.124	632.626	1230.87
tr|M0V3U0|M0V3U0_HORVD	DLHNQAQSSGDRQTVC[CAM]NC[CAM]LKG	796.698	3	y15	7.64777	855.388	2	y	15	4693.19	3026.04	3779.73	3174.57	1123.16	2391.25	1357.32	1131.14	2243.66	3994.26	1459.46	2376.86	8585.88	4266.42	5608.64	4807.57	7588.62	2409.73	8808.7	3366.92	3387.58	3937.64	2668.29	1645.76	1803.85	2578.47	1621.78	385.661	0	3561.36	2469.96	2026	1852.89	1534.03	1425.43	2541.45
tr|M0V3U0|M0V3U0_HORVD	DLHNQAQSSGDRQTVC[CAM]NC[CAM]LKG	796.698	3	b15	7.64777	819.385	2	b	15	15006.2	6907.27	9906.49	8439.63	5488.8	9232.76	5341.16	4351.38	6074.52	10609	8081.49	7764.31	21827.6	9731.9	14979.2	23407.5	23971.8	10727.2	28159	8214.9	8180.78	16502	9820.19	5967.37	5776.19	6722.27	3441.84	243.98	77.7768	4460.22	6050.5	6148.22	8978.98	4508.05	5433.97	8100.67
sp|P06470|HOR1_HORVU	IQYVHPSILQQLNPC[CAM]K	646.68	3	y14	17.9593	848.946	2	y	14	144891	130517	118239	112906	89506.1	123539	72758.4	58576.8	73715.8	113910	66867.9	67122	70830.2	52310.9	49283.9	77053.9	70654.4	40916.8	36526.1	26561.3	32003.4	38961.3	27958.4	16594.3	132707	119935	57937.8	41495.3	18590	15567.5	87648	79435.4	117408	85591.4	71802.5	91369.8
sp|P06470|HOR1_HORVU	IQYVHPSILQQLNPC[CAM]K	646.68	3	y6	17.9593	759.382	1	y	6	85194.2	81123.7	66854.1	70071.3	54520.3	77092.4	39807.5	36289.2	40063.9	68101.4	39918.7	40645.6	41396	27018.7	30053.6	45515.1	47338.3	25066.7	21038.4	16532.8	17338.9	20622.8	15694.7	10343.9	77368	81895.2	38669.2	32572.8	22404.1	19867.1	53154.6	51035.7	74559.6	49190.9	42900.2	54523.5
sp|P06470|HOR1_HORVU	IQYVHPSILQQLNPC[CAM]K	646.68	3	b8	17.9593	938.509	1	b	8	85502.7	76605.9	67442.6	70663.5	45395.4	74000.2	32325.7	28196	38550.2	58876.6	34756.8	30541.6	39073.2	25682.4	25675.1	39228.5	42445.5	21812.3	15543.1	13197.2	14805	16704	14269.2	8382.85	72794.5	71198.5	33491.5	24519.1	14304.3	8715.74	45592.8	41608.7	64795.1	42185.9	38822.3	47320.2
sp|P06470|HOR1_HORVU	IQYVHPSILQQLNPC[CAM]K	646.68	3	y11	17.9593	1297.69	1	y	11	97240.6	85898.2	71523.6	71108.3	54923.3	73219.3	40014.2	36485.6	45536.9	71249.1	42540.4	38057.3	41169.8	28983.2	28877.6	47534.4	45224.9	25870.3	22257.5	14094.5	15111.6	21071.7	17090.6	9288.6	79969.6	74644.5	32987.5	23406.7	15682.6	12701.7	56867.4	48369.9	77030.1	45914.7	46649.1	60920.2
sp|P06470|HOR1_HORVU	IQYVHPSILQQLNPC[CAM]K	646.68	3	b9	17.9593	1051.59	1	b	9	59618.2	43920.4	36269.1	42231.5	29713.4	40530.1	24347.1	19835.4	22628.3	38398.1	21138.4	21081.4	22148.2	14518.8	17635.2	29014.3	24684.1	14112.2	9663.41	7126.89	8600.86	10437	8707.44	5497.89	53385.9	45296.6	19888.4	16777.3	14281.3	10310.9	32143.3	26137.1	43552.8	26395.5	24664.3	33754.3
sp|P06470|HOR1_HORVU	IQYVHPSILQQLNPC[CAM]K	646.68	3	y7	17.9593	887.44	1	y	7	70864	57760.7	45575.4	51676.6	40966.1	51647.4	29082.1	33824.9	32466.2	47442.2	31113.9	25883.7	29952.7	22238.3	19250.1	36656.2	31560	22972.7	19326	16462.5	17983.2	15679.9	17627.4	12982	64491.5	63313.6	35962.1	26379.4	22449.1	12231.2	38586.8	38983.3	54080.2	33743.7	30360.7	39585.6
sp|P06470|HOR1_HORVU	LQIQYVHPSILQQLNPC[CAM]K	727.061	3	y16	20.824	969.517	2	y	16	75366.4	66607.6	59112.4	52261.5	40690.2	61124	34338.3	25554.3	34782.3	73834.8	32230.4	31925.5	25347.4	19504.6	21076	27938.1	23821.5	22381.1	2827.78	3556.86	12015.8	15770.5	11076	8174.98	69154.3	67785.1	34000.9	19277	5896.2	11794.9	57223.9	40955.2	65499.8	39758.7	37966	46473
sp|P06470|HOR1_HORVU	LQIQYVHPSILQQLNPC[CAM]K	727.061	3	y11	20.824	1297.69	1	y	11	52453	44528.2	36231.5	36863.9	28274.3	39458.6	21197.3	20588.1	24238.6	55586.9	22617	26466.3	19895.5	10773.5	9596.56	23028.5	18872.4	9737.42	0	2066.33	11169.1	7702.21	7756.97	4266.49	42855.8	62449.5	28422.1	16514.2	4423.9	0	31610.5	30427.7	36922.8	38398.1	34709.6	28054.9
sp|P06470|HOR1_HORVU	LQIQYVHPSILQQLNPC[CAM]K	727.061	3	y14	20.824	848.946	2	y	14	12238.8	11961.4	8561.42	10444.9	6753.8	11850.1	4801.11	4687.11	6253.19	9620.78	5393.47	6393.21	4664.08	3496.2	4182.61	3896.16	3919.41	3916.56	3013.01	0	2142.95	2262.8	2695.9	1452.86	13404.3	13378.8	8730.53	3514.77	0	2126.9	8373.69	6401.74	10274.9	7000.03	8156.81	7684.61
sp|P06470|HOR1_HORVU	LQIQYVHPSILQQLNPC[CAM]K	727.061	3	y15	20.824	912.975	2	y	15	22583.3	26437.9	14123.8	15272.7	11365.9	15864.6	10072.5	6910.13	9771.55	14931.5	9223.03	11057.6	7974.42	4251.05	6000.49	10028.7	10287.1	6731.04	245.47	1489.6	3301.23	3787.12	3487.29	1710.2	20210.8	21390.1	7600.3	6179.03	1411.84	6487.83	11387.1	11410.9	18342.3	9938.77	10979.7	11857.4
sp|P06470|HOR1_HORVU	LQIQYVHPSILQQLNPC[CAM]K	727.061	3	b14	20.824	831.472	2	b	14	5728.23	4113.06	0	0	2841.15	0	4067.36	0	2809.16	4344.53	0	0	4075.87	0	0	0	0	1525.09	3272.13	0	781.505	0	0	596.674	5152.15	8310.98	0	0	0	0	0	0	0	0	4420.52	0
sp|P06470|HOR1_HORVU	LQIQYVHPSILQQLNPC[CAM]K	727.061	3	y10	20.824	1200.64	1	y	10	8315.07	8411.1	4472.2	8960.67	2488.89	7090.33	5302.89	4986.14	0	5013.42	5659.94	3815.13	2078.15	3310.56	1752.59	2757.36	5344.01	2098.8	861.483	813.324	1400.76	1148.64	1625.43	1275.36	15328.3	10848.9	0	0	0	3211.72	7831.51	5762.29	9659.61	0	7894.81	0
sp|P06470|HOR1_HORVU	LQLQIQYVHPSILQQLNPC[CAM]K	807.442	3	y18	23.2069	1090.09	2	y	18	33038.8	29797.1	24393.4	17881.5	17222.2	22924.5	19498.1	18043.3	21465.4	26827.4	12401.2	3949.48	30563.6	13909.8	14369.1	30498.7	26021.3	17229.7	10593.3	8121.9	11117.4	17959.5	16815.4	6105.87	34706.7	34433.7	16497.4	10301.6	7812.66	730.648	27829.4	27563.3	38976.8	22032.4	23903.2	25587.1
sp|P06470|HOR1_HORVU	LQLQIQYVHPSILQQLNPC[CAM]K	807.442	3	y11	23.2069	1297.69	1	y	11	40782.2	38768.6	27210.8	21231.9	21739.6	23787.3	27342.5	17588.5	23203.7	27337.8	14528.6	13029.2	31751.8	16226.9	17994.3	30930.4	28803.4	22904.8	13764.6	13161.9	14374.1	21825.5	17775.3	8560.74	32215.5	32186.9	22773.4	13256.1	10803.7	1401.62	30215	28676.2	39915.5	23092.4	21716.9	23471.2
sp|P06470|HOR1_HORVU	LQLQIQYVHPSILQQLNPC[CAM]K	807.442	3	y17	23.2069	1033.55	2	y	17	14306	10783	9848.54	8521.9	8434.93	9138.76	7169.92	6716.64	7900.83	11679.8	6260.87	3092.84	10657.5	5170.26	5630.3	9820.31	8785.38	4965.65	4973.06	3394.84	5169.42	6371.63	5333.83	2399.73	12269.6	14504.5	4438.85	1974.77	3005.97	5589.5	10564.1	9193.61	15324.9	8533.24	8256.17	10286.9
sp|P06470|HOR1_HORVU	LQLQIQYVHPSILQQLNPC[CAM]K	807.442	3	y16	23.2069	969.517	2	y	16	15728.8	18655	10488.9	9819.73	7847.72	14863.4	7003.2	8434.5	10367.8	13218	5116.05	5883.66	0	4921.73	5910.93	22082.1	10554.7	0	12377.1	6722.19	4764.72	6716.66	10085.8	2902.64	16635.4	16854.6	8772.88	3792.87	4448.17	1571.76	10737	13988.6	19730.3	10213.4	9980.36	13123.2
sp|P06470|HOR1_HORVU	LQLQIQYVHPSILQQLNPC[CAM]K	807.442	3	y15	23.2069	912.975	2	y	15	8665.09	8704.48	6879.96	5798.46	3711.96	7397.35	5801.32	5544.36	5432.51	6795.87	4235.62	3067.98	9745.93	4815.59	5828.03	8432.96	6681.85	5812.25	4419.13	2271.18	5441.87	4388.51	4884.51	1663.5	9580.86	10496.8	4522.63	2073.07	2557.77	0	7209.97	5755.25	10640.4	5282.04	6673.16	7030.29
sp|P06470|HOR1_HORVU	LQLQIQYVHPSILQQLNPC[CAM]K	807.442	3	y14	23.2069	848.946	2	y	14	5390.38	5129.37	4859.61	4418.83	2179.65	3560.67	3890.46	2856.8	2921.5	5324.02	2120.05	1956.47	5319.79	1908.72	3150.01	5611.04	3747.99	2526.78	2824.5	1420.66	2261.74	3218.45	2552.44	930.165	6127.14	6095.75	2918.42	2762.04	2427.01	334.144	4814.73	4251.39	6607.25	3924.16	3183.06	4496.36
sp|P06470|HOR1_HORVU	VFLQQQC[CAM]SPVPVP	749.89	2	b10	19.4635	1187.59	1	b	10	89758.9	71689.2	75764.5	58562.6	41100.8	77646.9	29033.9	27267.9	35745.7	51649	28438.2	29852.9	38409.3	5802.72	32861.2	40808.3	35372.6	22109	17287.8	9022.18	9559.55	15300.3	10899.3	5067.62	61978.3	67891.9	38210.7	27279.8	1190.48	1332.68	33998.2	40118.9	44541.4	27445.6	32868.1	36599.2
sp|P06470|HOR1_HORVU	VFLQQQC[CAM]SPVPVP	749.89	2	b12	19.4635	1383.71	1	b	12	19913	18314.2	16736.3	13602.7	9346.45	18429.7	5834.27	6030.64	8408.54	13110.9	7380.24	6429.59	9406.98	1305.29	7498.22	10876.2	9224.16	5690.95	4199.73	1197.54	2311.79	3308.51	2937.56	1007.3	16217.5	18232.3	9062.97	6543.08	0	0	6957.01	9242.41	10718	6954.38	7285.44	9096.64
sp|P06470|HOR1_HORVU	VFLQQQC[CAM]SPVPVP	749.89	2	b8	19.4635	991.467	1	b	8	31705.7	28391.5	16780.5	13173.3	11190.2	21160.9	7015.22	6445.32	8816.19	10700.1	8716.18	7406.64	7408	0	5924.54	11029.6	7520.37	5640.75	2881.07	0	3670.06	2533.62	2952.17	0	14004.1	18680.1	9942.88	6335.91	0	1885.84	7180.7	8553.48	14388.7	5764.16	10105.4	7106.08
sp|P06470|HOR1_HORVU	VFLQQQC[CAM]SPVPVP	749.89	2	b7	19.4635	904.435	1	b	7	30970.2	27229.9	23613.8	20004.1	16983.6	29093.4	12959.4	9932.54	11615.6	0	14687.8	10522.6	10706.9	4731.32	10846.1	11048	15935.3	6638.81	7760.25	5097.56	5141.21	7569.66	5813.4	5053.93	12690.1	14106.5	7879.84	4428.66	867.934	3328.27	9875.51	6934.74	8629.36	6747.49	9887.68	9407.74
sp|P06470|HOR1_HORVU	VFLQQQC[CAM]SPVPVP	749.89	2	b9	19.4635	1088.52	1	b	9	8604.85	9049.19	6837.4	5062.88	7576.12	9176.77	3112.36	0	0	7468.94	0	4054.99	4388.7	6324.41	0	0	0	2988.44	981.659	8210.41	0	0	0	0	8314.85	7967.73	5060.52	0	925.522	943.176	5059.17	6114.47	7330.43	0	4774.71	5778
sp|P06470|HOR1_HORVU	VFLQQQC[CAM]SPVPVP	749.89	2	y8	19.4635	883.434	1	y	8	4283.1	0	2672.52	0	1023.19	0	1732.69	2292.85	0	0	0	0	0	14812.1	0	0	0	2618.74	0	19000.3	0	0	0	1541.63	0	0	0	0	0	4133.59	0	1904.88	0	1516.19	0	0
sp|P06470|HOR1_HORVU	SAFLQPHQIAQLEATTSIALR	765.753	3	y8	22.7493	832.489	1	y	8	129668	108129	88253.5	95482.9	66351.3	94605.4	45030.1	35473.7	51703.8	88603.6	46452.4	32036.4	44302.1	25989.1	26146.1	34390	35045.3	27530.6	21306.4	12315.6	10854.5	18200.2	16818.2	2523.96	101237	110823	66381	43379.6	7439.84	21907.8	68818.1	60153.3	56652.4	51592.8	50928.9	62408.7
sp|P06470|HOR1_HORVU	SAFLQPHQIAQLEATTSIALR	765.753	3	y9	22.7493	961.531	1	y	9	96126.9	81843.4	77772.2	76353.9	48087.9	74136.3	38499.1	28749.9	36662.6	66528.6	42496	26673.2	39601.8	24376.8	26280.2	33161.3	27714.9	20288	17103.4	7993.35	13189.8	15021.9	14095.7	4733.18	79880.4	95223.1	49401.8	41416	8678.93	15107.8	55100.7	39252.3	44468.7	41965.6	39596.2	49939.9
sp|P06470|HOR1_HORVU	SAFLQPHQIAQLEATTSIALR	765.753	3	y10	22.7493	1074.62	1	y	10	46496.6	34177.2	36948.3	34581.9	19696.6	31562	19371.1	14245.8	19780	33160.4	18596.6	10703.6	15652.4	8512.17	10714.3	14777.6	12958	10180.7	6824.79	3334.83	2899	6603.93	5951.62	6126.15	37274.1	46075.2	22508.6	17078.1	0	10209.6	22854.6	24011.5	21583.8	16508.7	18623	23333.7
sp|P06470|HOR1_HORVU	SAFLQPHQIAQLEATTSIALR	765.753	3	b10	22.7493	1093.58	1	b	10	29930.7	20696.9	18317.6	17999.9	14751.8	18009.5	11828.1	12466.8	11531	20144.5	12015	10857	14170.4	9458.63	8708.93	13931.8	10672.9	6438	6295.32	5245.05	6860.1	9163.05	5864	2779.98	22302.9	25449.5	18972.5	12917.5	1143.19	11127.4	17258.4	13141.1	20738.1	15640.3	13090.2	15362.1
sp|P06470|HOR1_HORVU	SAFLQPHQIAQLEATTSIALR	765.753	3	b11	22.7493	1221.64	1	b	11	21169.5	17545.5	13947.8	16284	9754.39	15537.6	8988.3	6575.32	8366.3	17655.1	10324.7	5981.7	8447.24	6135.85	6083.5	7170.66	7529.04	6478.32	3009.04	2437.4	2300.6	5050.56	3935.83	5348.39	15858.9	18845.5	12803.1	5637.86	9008.29	2688.38	11930.2	11246.3	12944.8	9792.56	10097.4	12603.3
sp|P06470|HOR1_HORVU	SAFLQPHQIAQLEATTSIALR	765.753	3	y16	22.7493	874.986	2	y	16	24985.6	11820.9	16513.3	11277.1	7653.81	10290.1	5948.9	4938.86	5112.42	9672.89	5487.45	4083.47	5761.4	3667.68	3017.15	4917.39	0	6074.18	2791.55	0	1696.63	2102.03	0	856.94	13002.2	13766.3	7997.03	4544.84	0	0	7596.36	11008.7	10856.1	10510.4	10496.2	10168.8
sp|P06470|HOR1_HORVU	VFLQQQC[CAM]SPVPVPQR	891.97	2	b12	14.4966	1383.71	1	b	12	32292.9	25673.7	27314.9	19604.1	11086.9	29507.2	15644.8	12791.5	0	19715.4	0	12523.7	0	12042	5406.05	0	0	7515.27	9666.89	154.513	8064.57	4254.5	6969.21	4469.32	19317.4	25971	15656.3	12331.1	4348.69	0	17726.3	23044.3	28052.4	14389.9	19570.9	26155.8
sp|P06470|HOR1_HORVU	VFLQQQC[CAM]SPVPVPQR	891.97	2	b10	14.4966	1187.59	1	b	10	33323.6	18603.5	24484.1	18818.3	15994.9	24759.2	13608.6	8837.96	14869.5	34526.5	16296.7	12026.4	11882.1	0	521.844	9968.35	11441.4	0	0	0	0	0	0	0	12694.7	16386.9	10323.2	5120.43	1846.73	3557.83	16698.6	13927	20109.3	13606.7	13411.4	21610.2
sp|P06470|HOR1_HORVU	VFLQQQC[CAM]SPVPVPQR	891.97	2	y9	14.4966	1039.54	1	y	9	39110.2	30893.3	30818.9	24497.1	13208	29845.2	15555.3	12168.9	19582.4	32820.3	13802.2	13529.2	12058.8	4287.25	0	12965.7	11492.8	3866.07	5145.35	0	4295.72	396.088	2891.32	1791.61	22768.7	27993.3	16343.3	9564.55	3822.76	5511.13	19973.1	21962	35893.1	18765.5	22273.7	28445.9
sp|P06470|HOR1_HORVU	VFLQQQC[CAM]SPVPVPQR	891.97	2	y10	14.4966	1167.59	1	y	10	34372.9	24006.2	24585.8	18555.9	12153.9	23863.8	12099.2	9150.73	15819.4	28726.1	12146.9	11649.3	9875.32	4445.53	665.321	9488.52	7839.66	4091.55	4849.97	787.978	2805.48	347.096	2908.06	1284.59	18210	24903.4	15262.8	8254.01	3723.16	5580.82	17403.2	18905.3	24635.5	15756.4	19320.9	23576.8
sp|P06470|HOR1_HORVU	VFLQQQC[CAM]SPVPVPQR	891.97	2	y11	14.4966	1295.65	1	y	11	33991.5	22920.2	25495.2	18185.8	12310.5	25038.3	12247.1	10214	14627.4	28466	10692.3	11388.6	9918.12	0	1271.84	12583.2	12119.8	5204.87	0	622.497	3112.71	386.688	3821.85	0	19740.9	23802.7	16418.1	9071.86	4501.73	5567.41	17366.9	18369.3	26764.1	13410.5	15916.4	22112.3
sp|P06470|HOR1_HORVU	VFLQQQC[CAM]SPVPVPQR	891.97	2	y13	14.4966	1536.8	1	y	13	6742.17	5188.27	5206.82	3817.06	1920.75	4786.81	1994.17	2092.87	3727.16	6115.88	2799.15	2279.14	1416.83	1876.74	0	1899.07	1326.73	981.517	0	139.6	965.381	534.59	0	312.19	4687.14	4195.68	2810.67	1793.34	607.695	1563.71	3817.97	3867.1	5002.95	3865.21	2932.97	3823.24
tr|M0UYA9|M0UYA9_HORVD	ELGVALADDKATVAEVFPGC[CAM]R	740.044	3	y17	19.9064	910.454	2	y	17	383596	351289	360699	279273	201659	289587	372509	358277	462460	541312	406482	457245	209571	258263	293164	204845	284258	154154	243768	308341	325514	306833	275594	237419	220326	230425	128857	58161.4	19956.6	27772.6	310140	318918	411877	290052	296050	328643
tr|M0UYA9|M0UYA9_HORVD	ELGVALADDKATVAEVFPGC[CAM]R	740.044	3	y7	19.9064	864.403	1	y	7	712385	669721	676005	504484	362497	527777	751967	705459	864057	1.13426e+06	739953	895251	428034	472032	526653	356762	521563	254826	462210	579297	613453	605207	484786	432811	385946	427985	234906	152249	42504.1	61298.4	596978	636376	868239	572543	595805	678248
tr|M0UYA9|M0UYA9_HORVD	ELGVALADDKATVAEVFPGC[CAM]R	740.044	3	y11	19.9064	1206.59	1	y	11	406069	366298	368664	270758	194596	302624	408632	369476	508290	687618	407302	497688	234816	252513	281624	183750	287994	143820	256333	290257	343672	346432	272148	233410	210183	204969	112386	69037.6	25584.7	34533.8	329288	336650	465611	303997	312348	367822
tr|M0UYA9|M0UYA9_HORVD	ELGVALADDKATVAEVFPGC[CAM]R	740.044	3	y10	19.9064	1135.56	1	y	10	448847	395795	388216	288438	210660	332063	447363	396834	539848	748247	450913	469582	251096	272215	300190	173336	303510	154195	279733	340138	372173	359295	278401	255148	240544	227683	123245	76259.9	29168.7	31799.1	356159	377153	512791	330075	330176	397392
tr|M0UYA9|M0UYA9_HORVD	ELGVALADDKATVAEVFPGC[CAM]R	740.044	3	y8	19.9064	935.44	1	y	8	1.06386e+06	961957	1.0066e+06	717768	517190	776071	1.02033e+06	986022	1.20457e+06	1.55912e+06	1.03383e+06	1.24873e+06	630694	688082	744866	531092	757721	381786	651557	835015	925139	846203	687204	635542	589881	591037	336434	205117	59849.2	65691.1	900260	892602	1.19603e+06	808964	839817	941618
tr|M0UYA9|M0UYA9_HORVD	ELGVALADDKATVAEVFPGC[CAM]R	740.044	3	y9	19.9064	1034.51	1	y	9	450393	474508	411960	339060	229572	312579	468704	422531	544917	702718	382291	554453	382107	439472	428159	256262	359397	210269	270280	335752	455018	409257	348218	270151	315658	440638	277392	0	0	83152.6	399562	500309	560369	457800	456367	534677
tr|M0UYA9|M0UYA9_HORVD	SQC[CAM]AGGQVVESIQK	745.867	2	y11	8.92046	1115.61	1	y	11	442585	404134	473057	307831	219432	395792	487097	408068	533157	857353	568631	557228	256628	303069	327426	288628	413469	185996	336968	368415	370674	428051	287928	254242	187718	241632	137675	80215.6	11602.4	35669.8	338827	351323	556971	281034	344023	387188
tr|M0UYA9|M0UYA9_HORVD	SQC[CAM]AGGQVVESIQK	745.867	2	y10	8.92046	1044.57	1	y	10	625228	613130	686493	450639	336039	573492	763913	587390	742496	1.21219e+06	813883	822837	355390	452776	472453	429673	604277	276165	488860	510257	541982	641048	424470	380983	295755	356200	208003	123935	20109.1	51787	486777	507233	778891	429257	502568	566114
tr|M0UYA9|M0UYA9_HORVD	SQC[CAM]AGGQVVESIQK	745.867	2	y12	8.92046	1275.64	1	y	12	463618	421586	494661	324048	237807	424873	528401	449036	581419	866739	595507	575965	266732	323124	349220	300910	436252	192773	370649	365955	398207	440366	306654	278828	205074	249525	124971	73178.4	11193	29916.2	361272	371348	575136	310547	368157	411863
tr|M0UYA9|M0UYA9_HORVD	SQC[CAM]AGGQVVESIQK	745.867	2	y7	8.92046	802.467	1	y	7	289033	241720	314345	190521	136271	259694	335563	252527	363457	564466	356579	378776	147327	189079	201734	174058	253607	113189	205009	225732	237152	261785	173504	142725	104929	152190	92315.7	57315.1	7313.25	32206.5	211057	220643	362140	159903	220076	244088
tr|M0UYA9|M0UYA9_HORVD	SQC[CAM]AGGQVVESIQK	745.867	2	b8	8.92046	788.336	1	b	8	99976.4	87413.7	109807	71888.9	50614.6	89704.9	122182	92742.3	130348	204046	126712	141544	54692.1	68832.3	76206	66244.4	90806.1	39022	72744.8	80381.4	80027.3	88008.5	62236.2	53667.2	41107.3	57948.4	38273.3	23471.6	2994.04	14033.9	76945.3	80259.5	133652	59426.3	81113.2	85744.3
tr|M0UYA9|M0UYA9_HORVD	SQC[CAM]AGGQVVESIQK	745.867	2	y9	8.92046	987.547	1	y	9	223584	200839	239631	153610	109045	208025	279325	206970	288019	482593	282307	308394	123885	148347	163048	144082	198051	88826.1	164179	178957	191630	213297	143003	115644	97911.8	121297	68687.8	45720.2	5909.39	23243	169233	175965	300268	134818	185341	202925
tr|M0UYA9|M0UYA9_HORVD	QIAAIGDEWC[CAM]IC[CAM]GALGSMRG	1083	2	b14	19.018	1545.68	1	b	14	32316.9	28967	22989.7	20696.6	0	22453.9	26242.7	20340.8	31945.8	52421.8	26157.2	21213.4	19303.4	15741.9	0	15200.1	24095.3	10272.7	20044.2	14943.6	18624.2	18069.9	12307.2	9197.16	23689.3	28389.3	19616.2	12535.1	583.701	0	30191.2	26096.4	19593.3	21434.7	25950.2	30186.5
tr|M0UYA9|M0UYA9_HORVD	QIAAIGDEWC[CAM]IC[CAM]GALGSMRG	1083	2	b10	19.018	1144.51	1	b	10	23019.7	15592	21612.1	18533.6	971.151	17625.8	16141.1	10633.5	12531.2	23177.6	15764.6	13323	14436.6	10958.4	0	9287.97	15649.4	9036.54	11056.6	7837.94	8477.6	10994.4	9626.62	6154.23	10804.1	11176.7	8415.15	4823.44	413.934	0	13009.6	12526.4	15763.5	13302	16850	17611
tr|M0UYA9|M0UYA9_HORVD	QIAAIGDEWC[CAM]IC[CAM]GALGSMRG	1083	2	b15	19.018	1658.77	1	b	15	12110.1	10469.7	8818.49	6955.11	335.601	7304.63	11360.7	8130.29	11636.6	17246.9	11060.3	7700.8	8010.65	7267.36	0	6688.55	8787.08	3252.25	8177.68	4820.57	6560.02	6779	4335.27	4522.79	9106.1	9562.69	7235.3	3690.16	852.493	703.603	10362.3	12992.2	7919.01	9121.31	9721.63	12893.7
tr|M0UYA9|M0UYA9_HORVD	QIAAIGDEWC[CAM]IC[CAM]GALGSMRG	1083	2	b11	19.018	1257.59	1	b	11	9310.66	8410.46	8427.43	7147.59	1329.87	5562.6	8729.23	5406.56	7834.85	15811.4	7280.81	6133.61	7502.45	4603.82	1001.69	3488.87	8943.69	2914.91	6136.8	4550.5	5475.62	6528.93	3949.9	2478.35	6673.49	6725.2	3454.99	2257.92	868.818	322.7	6983.46	7658.03	4822.25	7170.05	8781.94	9280.54
tr|M0UYA9|M0UYA9_HORVD	QIAAIGDEWC[CAM]IC[CAM]GALGSMRG	1083	2	b16	19.018	1715.79	1	b	16	0	0	3434.36	2513.71	0	2010.42	3097.24	2801.16	3481.09	0	3872.32	2215.61	1763.18	1956.64	73.6584	2517.36	0	1147.65	2484.85	1646.77	1967.87	0	1533.35	1181.53	2277.28	0	1432.1	0	0	37.063	4050.59	3094.92	2308.08	2309.03	2555.71	3672.28
tr|M0UYA9|M0UYA9_HORVD	QIAAIGDEWC[CAM]IC[CAM]GALGSMRG	1083	2	y10	19.018	1021.49	1	y	10	63449	63478.7	48351	36662	0	39459.9	53802.2	39579.6	63524.8	98003.1	51720.4	44104.6	35480.4	33176.3	345.991	24836	46212.7	18311.7	32896.6	28327.7	29031.7	35645.8	21777.1	15686.1	44950	55150	34385.1	22089.8	855.904	0	48959.2	54165.6	38377.3	38017.2	49671.5	61058
tr|M0UYA9|M0UYA9_HORVD	QIAAIGDEWC[CAM]IC[CAM]GALGSMR	1054.49	2	y14	23.3874	1611.67	1	y	14	277978	261086	253026	203110	122795	192459	268777	188103	284067	360508	186022	368503	198860	164980	201329	155278	224939	88009.6	186078	165707	193699	251043	162579	104665	223575	237070	118123	58640.7	2565.83	91.8486	317936	348528	844520	305285	309091	363529
tr|M0UYA9|M0UYA9_HORVD	QIAAIGDEWC[CAM]IC[CAM]GALGSMR	1054.49	2	y15	23.3874	1724.76	1	y	15	80735.5	81343.4	84138	55578.7	32883.4	56084	81479.5	48884	87212.4	112826	56355.9	114983	58014	46382.4	58774.6	42928.6	59714.7	29333.3	61136.4	48879.6	56323.1	71911.5	49092.7	28098.5	63087.7	72540.2	42649.5	24749.1	946.281	0	99605.1	105139	265342	93918.9	96132.1	115088
tr|M0UYA9|M0UYA9_HORVD	QIAAIGDEWC[CAM]IC[CAM]GALGSMR	1054.49	2	y12	23.3874	1439.62	1	y	12	87193.1	88386.6	82492.9	73090.1	43880.7	65482.9	83615.5	63545.2	91005.8	123676	59874.4	123703	62678.5	54464.5	62420.1	50603.9	66713.7	27867.5	63273.2	53448.8	54764.6	79444	46644	33169.1	69551.2	79085.5	48160.5	24406.4	724.845	181.671	105347	122248	301298	105565	94606.6	124278
tr|M0UYA9|M0UYA9_HORVD	QIAAIGDEWC[CAM]IC[CAM]GALGSMR	1054.49	2	y11	23.3874	1310.58	1	y	11	113841	108368	104687	82488	57519.6	85573.4	108268	78540.3	114899	153060	74710.4	157349	80916.5	73199	81128.1	60543.3	82718.7	38830.2	75640.6	66476.4	71657.7	103221	67074.9	43413.1	98142.6	104216	57857.3	30547.4	630.774	2163.85	137835	149863	381193	134194	120589	158198
tr|M0UYA9|M0UYA9_HORVD	QIAAIGDEWC[CAM]IC[CAM]GALGSMR	1054.49	2	y10	23.3874	1124.5	1	y	10	145241	141147	115872	100689	64494.2	92992.8	132145	87899.6	133279	186828	94532	184112	94673.4	80379.2	87249.3	66193.5	106921	41834.4	85588.3	83437.8	81641	113638	77222.7	47231.4	107155	125425	72554.5	39507	846.505	3978.32	158783	162088	461493	150116	146120	191651
tr|M0UYA9|M0UYA9_HORVD	QIAAIGDEWC[CAM]IC[CAM]GALGSMR	1054.49	2	y16	23.3874	1795.79	1	y	16	54817.6	51587.9	49762.7	37295.1	23465.1	32299.5	52844.2	35490.9	50567.6	72106.8	31236.4	62743.3	35018.2	31548.8	39522	31987.5	39317.9	14925.4	38579.1	30157.3	36081.1	45063.9	31140.5	20546.8	41164.1	50741.6	26829.8	17937.1	835.602	167.787	61483.8	68871.5	168623	60540.2	53532.2	64254.9
tr|M0UYA9|M0UYA9_HORVD	SQC[CAM]AGGQVVESIQKDC[CAM]C[CAM]R	694.644	3	y16	9.59145	933.916	2	y	16	182344	73485.5	201514	121749	82178.2	147203	110984	151308	168928	284310	167670	186127	278693	97688.3	178234	181406	205820	109929	207353	224700	208153	242917	197015	142427	185669	191831	93106.1	70715.8	13355.4	26198.1	302792	385588	346500	259183	297505	307049
tr|M0UYA9|M0UYA9_HORVD	SQC[CAM]AGGQVVESIQKDC[CAM]C[CAM]R	694.644	3	y10	9.59145	1294.59	1	y	10	75962.1	32075.8	88456.1	51136.9	32674.3	59801.2	48443.3	64614.2	79601.6	135930	71734.8	80695.5	116925	44399.8	77971.4	75648	92461.6	44578.8	81702.2	109278	97842.2	116626	88639.5	59696.3	76570.7	79584.3	38852.4	28735.7	7547.46	16510.2	135935	207050	172045	121326	148393	156342
tr|M0UYA9|M0UYA9_HORVD	SQC[CAM]AGGQVVESIQKDC[CAM]C[CAM]R	694.644	3	y15	9.59145	853.901	2	y	15	90305.3	38407.6	102103	56826.4	40496.7	74169.1	54663.5	71274.7	88829.5	157860	85409.6	94224.9	135976	51615.5	89951.3	92543.8	103670	51946.4	104602	121148	112000	126522	94643.8	74085.1	90889.1	99303.9	51365	38694.7	8264.71	16704	153330	217892	191396	136160	157032	167196
tr|M0UYA9|M0UYA9_HORVD	SQC[CAM]AGGQVVESIQKDC[CAM]C[CAM]R	694.644	3	y8	9.59145	1066.48	1	y	8	68265.7	26096.2	91339.7	45645.4	33830.5	62053.6	43568.2	62807.3	77434.4	134961	73977.1	78156.8	112844	42452.3	76945	82005.4	89281.5	42810.4	83613.5	101623	95023.6	111166	87475.3	60577.5	68178.8	78626.4	40155.3	31776	8052	19786.4	129025	198952	171927	115615	145637	152297
tr|M0UYA9|M0UYA9_HORVD	SQC[CAM]AGGQVVESIQKDC[CAM]C[CAM]R	694.644	3	y9	9.59145	1195.52	1	y	9	92832.1	42219.7	109310	63620.7	41389.7	73207	51689.3	73535.5	97678.8	150926	76975.3	94594.8	132023	56787.8	93995.1	98046.9	107577	52714.3	99461.3	120067	111120	132805	102569	76025.1	85276.4	98500.4	47062.2	38683	9100	21612.3	135429	226030	202193	135991	166343	174616
tr|M0UYA9|M0UYA9_HORVD	SQC[CAM]AGGQVVESIQKDC[CAM]C[CAM]R	694.644	3	y6	9.59145	866.361	1	y	6	61162.8	22704.2	72044.4	44123.3	29862.5	52153	41857.2	54638.7	75823.7	112997	64332.8	67438.9	85594.7	34989	60244.7	75714.4	75860.5	42627.5	79343.6	94786.9	79890	96478.5	77188	49172	59300.3	69534.9	40615.2	33118.5	7549.32	19418.6	103495	167326	144036	104826	121015	132858
tr|M0UYA9|M0UYA9_HORVD	SPGEWC[CAM]WPGMGYPVYPFPR	761.677	3	y7	26.5093	875.477	1	y	7	499020	568292	585467	442476	312711	418196	685597	620675	616058	837302	557197	1.03804e+06	406186	448613	464073	314451	484056	213020	471409	470226	528188	610567	448061	331302	673708	670383	375317	243816	134372	75040.5	1.03574e+06	961583	2.01536e+06	996380	851126	1.01137e+06
tr|M0UYA9|M0UYA9_HORVD	SPGEWC[CAM]WPGMGYPVYPFPR	761.677	3	b7	26.5093	903.345	1	b	7	70285.6	75404.6	78229.8	58926.8	39640.8	52412.2	86904.2	80816.2	78562.6	116959	73303.7	151831	49054.5	56570.4	59028.8	40436.4	60854.3	26286.2	62480.4	61713.2	65578.7	81203.6	55923.3	41751.7	86124.5	81509.6	47201.8	34373.9	23714.2	16257.1	138474	126360	336093	133702	119827	143587
tr|M0UYA9|M0UYA9_HORVD	SPGEWC[CAM]WPGMGYPVYPFPR	761.677	3	b11	26.5093	1245.48	1	b	11	76173.6	83660.8	85957.6	61203.1	43709	55090.4	99745.3	82095.6	82812.2	124782	78766.8	158488	53852	65217.1	68053.7	42832.7	67102.3	31199.9	68726.2	70385.4	79541.6	87647.3	64641.7	47449.7	88800.2	89264.8	48573.6	31804.4	20482.5	16839	142211	136854	326641	150593	127164	155902
tr|M0UYA9|M0UYA9_HORVD	SPGEWC[CAM]WPGMGYPVYPFPR	761.677	3	b12	26.5093	1408.54	1	b	12	47320	52941.7	51249.7	43160.6	29739	38921.5	67330.6	56594.2	58663.3	83888.7	54404.9	101328	36471.6	41274.2	44772.9	28657.6	42811.6	20778.3	44316.6	46426.8	52959	59029.3	39595.6	32307.6	63144.7	56402.3	35488.5	21139.7	13964.2	12157	101600	87440.8	212277	98691.1	86295	100879
tr|M0UYA9|M0UYA9_HORVD	SPGEWC[CAM]WPGMGYPVYPFPR	761.677	3	y6	26.5093	778.425	1	y	6	76206.5	86059.7	94571.3	67151.4	43416.1	60922.3	101379	86042.9	91024.3	147974	79024.9	177488	55358.2	64201.7	64669	41785.3	68327.9	28494.8	65879	66607.3	73747.5	90969.1	61587.6	44938	97608.7	92986.1	61599.1	44473.8	29552.7	20079.6	154668	158867	417424	161225	136997	164456
tr|M0UYA9|M0UYA9_HORVD	SPGEWC[CAM]WPGMGYPVYPFPR	761.677	3	y9	26.5093	1095.56	1	y	9	58140.6	64980.5	67984.8	51723.3	31397.4	44348.1	73568.8	60791.3	65036.5	96449.5	57846.6	126391	38159.6	43277.6	50066.4	32695.2	46714.2	21651.5	49155.8	53190.5	52480.5	67819.1	47409	34822.6	70484.3	63767.6	36647.3	27127.7	16772.2	15881.8	113210	104204	281753	111089	93643.6	124103
tr|Q546U1|Q546U1_HORVU	LLVAGVPALC[CAM]NVPIPNEAAGTR	1116.61	2	y16	23.3822	1679.85	1	y	16	1.62025e+06	1.2852e+06	1.46341e+06	1.21995e+06	829354	1.17302e+06	1.03456e+06	615603	934149	1.49384e+06	734831	783166	953833	935415	1.00327e+06	863261	1.29456e+06	534975	816383	696280	756883	1.05259e+06	687247	451646	926950	1.00007e+06	379830	158020	80926.4	59843.3	1.11079e+06	1.2502e+06	1.75585e+06	997297	1.11988e+06	1.35782e+06
tr|Q546U1|Q546U1_HORVU	LLVAGVPALC[CAM]NVPIPNEAAGTR	1116.61	2	y13	23.3822	1398.68	1	y	13	384482	256643	310354	239288	181816	228365	203309	109391	180311	329299	154747	154133	176808	171032	195051	171194	259543	94570.4	145416	124463	128474	205213	122482	77137.1	170851	183257	79231.2	42953.8	27163.9	20184	216293	256505	384449	186047	218365	272470
tr|Q546U1|Q546U1_HORVU	LLVAGVPALC[CAM]NVPIPNEAAGTR	1116.61	2	b12	23.3822	1207.69	1	b	12	100094	77551.3	84726.5	72324.5	52669.1	64541	56770.8	34067.5	51028.1	88095.7	46126.9	47542.2	60363.8	53677	61315.6	51288.1	79680	32291.3	45484.9	38915.7	41196.5	61074.1	38441.9	24605.4	49968.9	61308.4	32397.5	22146.5	15549.4	16606.7	65320.6	74025	103752	57599	62186.9	75918.9
tr|Q546U1|Q546U1_HORVU	LLVAGVPALC[CAM]NVPIPNEAAGTR	1116.61	2	b14	23.3822	1417.82	1	b	14	0	0	0	0	0	0	0	0	0	0	0	0	0	0	0	0	0	0	0	0	0	0	0	0	0	0	0	9031.86	5790.56	7581.85	0	0	0	0	0	0
tr|Q546U1|Q546U1_HORVU	LLVAGVPALC[CAM]NVPIPNEAAGTR	1116.61	2	y14	23.3822	1511.76	1	y	14	141307	102223	121723	97013.3	67428.7	88897.9	81356.7	43313.6	65921.1	130663	56357.9	61079.3	70831	69694.4	79583.6	66300.6	96070.6	39074.3	53858.9	49093.1	50735.2	79324.6	49979.8	29592	66323.1	78492.8	34301.6	25892.7	15218.4	14557.8	81366.5	98357	143639	72633.9	86334.2	113394
tr|Q546U1|Q546U1_HORVU	LLVAGVPALC[CAM]NVPIPNEAAGTR	1116.61	2	y12	23.3822	1238.65	1	y	12	213809	161946	180018	141827	101503	136201	123080	72401.9	95340	202810	86589.8	94938.3	108562	103159	116807	97536.8	155996	53927.9	87651.1	72024.9	81462.1	117958	70953.5	44275.9	99933.4	113002	47937.5	34751.7	21886	23386.6	127569	146332	212562	118104	123511	170872
tr|Q546U1|Q546U1_HORVU	DC[CAM]C[CAM]QEVANISNEWC[CAM]R	970.888	2	y9	14.9089	1149.51	1	y	9	1.11882e+06	914360	1.10573e+06	788227	542169	798913	703356	420786	682489	1.15371e+06	636464	565963	740197	841990	879858	732952	935288	427145	607357	504315	539669	694875	447703	344453	407950	580883	300881	171578	30782	63362.4	473641	669278	916714	482475	690157	779831
tr|Q546U1|Q546U1_HORVU	DC[CAM]C[CAM]QEVANISNEWC[CAM]R	970.888	2	y8	14.9089	1078.47	1	y	8	678467	520837	627624	444754	298780	453906	402547	217057	382039	665111	349157	317319	393652	483767	496963	417478	547638	230828	324636	286062	300175	370675	244145	177697	220884	322483	175581	100589	20824.8	52281.1	254767	362010	509191	260711	391363	444357
tr|Q546U1|Q546U1_HORVU	DC[CAM]C[CAM]QEVANISNEWC[CAM]R	970.888	2	y10	14.9089	1248.58	1	y	10	592834	442947	540549	363400	246148	376524	337072	191825	326434	579965	306360	253990	342979	375867	400917	349082	434083	186380	286349	227787	239887	312239	208435	150097	181771	267577	133321	73698.6	15032.2	38217	207402	301566	425584	213960	321928	366097
tr|Q546U1|Q546U1_HORVU	DC[CAM]C[CAM]QEVANISNEWC[CAM]R	970.888	2	b9	14.9089	1090.43	1	b	9	164703	134780	165498	122171	83646.3	120994	113392	67015.6	104207	166259	96053.5	91224.6	111248	122271	132572	111586	136671	65627	96123.8	80507.4	85184	98625.2	70915.6	51125.2	65955.2	90158.3	53766.4	31052.4	6335.17	18488.1	72194.9	97220.3	137146	72219.6	112347	116089
tr|Q546U1|Q546U1_HORVU	DC[CAM]C[CAM]QEVANISNEWC[CAM]R	970.888	2	y11	14.9089	1377.62	1	y	11	355585	256453	336785	231100	143810	226979	192082	106505	184902	346722	160490	153583	196061	216520	228947	194971	255725	105676	159972	137967	146348	189030	113895	84464.4	109573	148825	87790.4	49664.7	9679.9	23439.8	127557	177910	244836	126795	195707	225717
tr|Q546U1|Q546U1_HORVU	DC[CAM]C[CAM]QEVANISNEWC[CAM]R	970.888	2	y12	14.9089	1505.68	1	y	12	133633	97144.2	123782	87763	60254.8	88207.6	75745	43927.9	70979.6	133878	70289.1	58758.1	75952.1	86435.5	88172.9	78330.6	93650.7	44063.4	60818.3	54374.1	60552.6	62319.9	47087.8	33982.8	42306.2	54090.7	36281.5	20705.5	3820.62	11787.2	50349.1	72391.3	98581.7	48566.9	76290.4	83771.4
tr|Q546U1|Q546U1_HORVU	SVYAALGVGGGPEEVFPGC[CAM]QK	1061.52	2	y13	19.5203	1361.62	1	y	13	524347	421940	462300	347363	264088	328333	353976	220490	362624	542459	300023	294144	291564	268534	291241	258827	372832	159230	262696	231265	246918	325706	228801	165302	240045	310740	123842	92185.1	35610.7	34042.2	347763	439805	520109	346454	400055	486534
tr|Q546U1|Q546U1_HORVU	SVYAALGVGGGPEEVFPGC[CAM]QK	1061.52	2	y15	19.5203	1517.71	1	y	15	325130	248918	302948	222968	162005	202794	220928	135520	204658	363235	184194	180783	178917	160531	185904	158691	227095	99197.4	149681	136623	152680	199690	138602	94612.1	150116	186430	68788.5	58628.1	22929.2	23420.3	216789	276402	343213	221565	250960	316039
tr|Q546U1|Q546U1_HORVU	SVYAALGVGGGPEEVFPGC[CAM]QK	1061.52	2	y12	19.5203	1304.59	1	y	12	190308	145085	170087	127303	96491.3	116098	126817	74557.1	116883	212773	106368	100996	109309	93656.1	106976	90555.4	135219	50635	87077.4	79865	80130.6	111179	76144.7	50889.7	85519.8	111417	43702.8	36974.6	16515.2	19339.6	124216	170000	199360	125551	151741	185479
tr|Q546U1|Q546U1_HORVU	SVYAALGVGGGPEEVFPGC[CAM]QK	1061.52	2	b16	19.5203	1533.76	1	b	16	50898.5	42525	50141	36263.4	27625.5	34345.2	35118.4	24472.8	37547.7	61609.9	30104.7	31637	31405.6	28547.9	33489.3	29108.2	39883.9	16725.2	32700.7	24633.9	28308	35788.1	22696.7	17786.7	25842.3	35608.3	15058.6	17376.1	4674.75	9468.82	34751.6	47125.7	54747.9	34544.9	39299.6	52233.6
tr|Q546U1|Q546U1_HORVU	SVYAALGVGGGPEEVFPGC[CAM]QK	1061.52	2	y11	19.5203	1247.57	1	y	11	142191	103899	124737	91384.3	64553.9	83657.8	90288.4	58606.7	87359.3	159727	75634.3	70667.2	74185.4	70547	76903.7	64954.1	93704.4	36556.9	65069	57917.8	62262.8	80732	51858.4	37390.9	62574.4	82472.1	37250.1	25870.4	13702.5	15455.9	93682.7	125571	148834	90319.9	107717	129785
tr|Q546U1|Q546U1_HORVU	SVYAALGVGGGPEEVFPGC[CAM]QK	1061.52	2	y10	19.5203	1190.55	1	y	10	167487	127179	147322	104244	74400.9	96483.2	102230	62726.2	99704	188066	86232.5	77567.9	84127.1	78174.9	77110.9	72281.8	104960	40959.4	68284.5	61522.9	64683.5	91304.4	59458	42213.9	68499.4	91416.8	40420.2	31096.3	14623.2	16459.3	102634	135166	168218	97885.7	129618	149156
tr|Q546U1|Q546U1_HORVU	LEC[CAM]VGNRVPEDVLR	828.43	2	b11	11.9404	1269.59	1	b	11	360751	257507	294388	422.123	7642.59	4996.59	515.06	1622.48	163683	366565	7658.31	7301.85	583.335	4746.41	192302	7534.17	8034.33	0	279.178	97727	338.124	850.063	6092.6	3168.44	509.007	1343.05	0	205.497	0	20216.3	0	1230.44	268314	0	4927.96	6594.86
tr|Q546U1|Q546U1_HORVU	LEC[CAM]VGNRVPEDVLR	828.43	2	b13	11.9404	1481.74	1	b	13	0	0	0	0	1393.71	185.532	62.4051	665.035	0	0	1262.99	1025.4	0	285.391	0	1603.22	2633.46	269.559	551.685	0	47.7341	623.671	825.359	778.825	157.969	258.751	143.091	88.5756	0	6637.28	0	304.513	0	103.937	335.462	694.504
tr|Q546U1|Q546U1_HORVU	LEC[CAM]VGNRVPEDVLR	828.43	2	b10	11.9404	1154.56	1	b	10	59850.6	48566.6	55852.4	0	1898.05	792.49	220.901	0	0	60378.2	2485.37	2443.38	1265.13	1455.76	0	2397.72	1634.04	240.113	3340.15	0	985.152	0	1082.34	886.819	153.84	517.187	0	0	463.123	5974.83	432.356	891.805	47777.3	0	0	1591.07
tr|Q546U1|Q546U1_HORVU	LEC[CAM]VGNRVPEDVLR	828.43	2	b8	11.9404	928.467	1	b	8	60526.9	46743.8	0	328.935	9410.07	489.407	0	1252.51	0	60542.3	9487.08	11620.9	0	1301.82	0	18715.1	20782.5	1627.99	2692.62	0	0	0	11066.9	3850.51	1976.63	1226.73	5430.77	616.041	0	7030.77	1414.31	4325.25	0	1739.73	4206.76	9881.93
tr|Q546U1|Q546U1_HORVU	LEC[CAM]VGNRVPEDVLR	828.43	2	y14	11.9404	828.43	2	y	14	1.39879e+06	1.0615e+06	1.16002e+06	5354.19	9309.54	0	0	0	779578	1.37913e+06	14815.6	8827.49	0	0	894025	13703.5	7794	0	0	567931	0	3139.71	7686.58	5700.48	0	0	0	4411.12	1370.37	28330.4	496.538	0	1.14187e+06	0	8281.07	7452.45
tr|Q546U1|Q546U1_HORVU	LEC[CAM]VGNRVPEDVLR	828.43	2	b12	11.9404	1368.66	1	b	12	0	0	0	0	2665.13	763.991	112.502	0	0	0	4937.23	4568.26	159.243	444.379	0	4245.51	3960.82	388.518	1588.98	0	0	0	1685.62	1073.28	661.92	1974.37	1245.65	116.351	47.7441	5874.24	650.403	315.48	0	142.903	1793.85	3411
tr|Q546U1|Q546U1_HORVU	ALVKLEC[CAM]VGNRVPEDVLR	517.54	4	y14	16.3472	828.43	2	y	14	81899.6	25496.7	81516.4	59228.9	51825.9	59499.1	31332.7	34690.4	41653.3	81149.8	33454.7	5596.53	134445	45972.9	79129.5	106032	108160	52684.8	50002.1	68311.3	57193.1	85254.7	58911.3	52167.9	103590	108830	33062	41840.6	17513.8	21317.2	109434	168917	142274	117590	137046	139611
tr|Q546U1|Q546U1_HORVU	ALVKLEC[CAM]VGNRVPEDVLR	517.54	4	y10	16.3472	577.817	2	y	10	111573	41814.4	119621	89148.9	74174.5	84245.9	44073.1	47828.2	54620.7	108797	53757	5606.07	208006	64205.5	123485	162688	167027	79814	77061.2	106786	87741.7	132868	94087.3	72521.6	152478	188557	59126.6	76988.6	33966.8	32445.8	191084	285282	234327	199828	227349	237355
tr|Q546U1|Q546U1_HORVU	ALVKLEC[CAM]VGNRVPEDVLR	517.54	4	y6	16.3472	728.394	1	y	6	93323.7	41228.6	84172.5	62336.4	45344.6	67822.8	21338.1	23699.8	0	110120	45607.8	2229.2	131775	56988.8	82067.6	98014.5	103162	49942	57703.9	67835.8	65458.6	80010.5	59388.9	37496.4	87458.5	116444	56321.7	51658.6	25594.1	31915.2	118124	166068	140522	112923	127766	138279
tr|Q546U1|Q546U1_HORVU	ALVKLEC[CAM]VGNRVPEDVLR	517.54	4	y13	16.3472	771.888	2	y	13	29323.4	7898.48	27344.7	19659.6	15804.4	20476.9	10737.4	11639.3	10988.1	26302	13155.3	383.873	48153	15026.4	30784	42282.7	42008.4	18817.9	19061.3	23854.1	22405.4	30985.8	23169	16873.6	35493.7	42885.3	12431.7	16360.9	6805.63	8424.57	43891.9	71347.4	58118.9	48127.8	53860.3	55295.4
tr|Q546U1|Q546U1_HORVU	ALVKLEC[CAM]VGNRVPEDVLR	517.54	4	y11	16.3472	627.352	2	y	11	37540.7	16228.6	45142.1	29566.5	24398.8	32412.3	14314.5	16801.9	20978	46224.4	18242.6	1833.31	61144.4	19574.8	39201.4	47310.9	52166.8	22557.4	22347	31181.1	28683.1	39277.7	27755.8	20178.6	64676.4	76585.2	32666.1	36264.1	17639.4	21329.3	71890.9	112703	106741	75337.8	90634.6	98746
tr|Q546U1|Q546U1_HORVU	ALVKLEC[CAM]VGNRVPEDVLR	517.54	4	y16	16.3472	628.344	3	y	16	114572	39079.2	120982	82756.8	74984.6	82499.7	42995.4	51810.9	52526.9	113318	58403.2	0	192922	65319.1	125171	147800	156321	83823.4	72298.1	102633	90088.5	132215	88665.9	74576.7	154880	179817	60709.7	62322.5	20152	17198.6	175892	252937	233697	190178	222927	229165
tr|Q546U1|Q546U1_HORVU	VPEDVLRDC[CAM]C[CAM]QEVANISNEWC[CAM]R	917.076	3	y8	19.9613	1078.47	1	y	8	72633.7	47342.1	76606.6	60181.3	45761.4	44787.8	45745	32192.5	44226.4	77353.6	40554	36443.7	63588.5	57585.8	62499.2	57665.7	74391.8	40394	58000.6	43064.9	50231.3	68720.8	54136.8	40883.4	38140.8	49384.3	33850.3	21446.1	7690.26	10922	47820.3	75703.5	80509.4	55300.5	65453.2	74358.9
tr|Q546U1|Q546U1_HORVU	VPEDVLRDC[CAM]C[CAM]QEVANISNEWC[CAM]R	917.076	3	y9	19.9613	1149.51	1	y	9	79650.6	45391.8	76361	64532.9	38225.5	47216.4	41310	32226.1	49599.1	79706	43151.4	36640.5	65261.7	55886.2	65640.6	57113.7	66318.8	39903.2	55604.2	51791.9	48984.8	54005.2	41570.5	34599.4	39905	52587.8	35221.9	20813.5	10471	23493.1	49752.1	69174.4	82139.9	52501.1	58049.6	71772.8
tr|Q546U1|Q546U1_HORVU	VPEDVLRDC[CAM]C[CAM]QEVANISNEWC[CAM]R	917.076	3	y20	19.9613	1277.05	2	y	20	9180.77	4641.24	10716.7	7019.17	6147.79	5571.79	5442.64	3956.14	5838.37	9780.06	3965.81	4647.69	7321.96	6337.16	9159.85	5104.39	9278.89	4699.45	7111.4	0	6189.38	6062.77	4936.06	3948.17	5606.21	5938.95	3357.89	1985.26	534.845	0	6289.8	9345.53	9348.49	5866.6	9503.44	9950.3
tr|Q546U1|Q546U1_HORVU	VPEDVLRDC[CAM]C[CAM]QEVANISNEWC[CAM]R	917.076	3	b16	19.9613	949.94	2	b	16	9576.48	5224.38	9409.95	5686.66	5597.67	4280.82	4945.59	3916.62	6630.03	8543.79	3864.52	5365.08	7340.89	7701.42	8689.8	6355.43	8955.59	5308.42	7841.09	0	7553.71	9134.05	5970.83	4773.84	5746.45	6723.05	5357.16	3556.04	1854.23	0	5868.91	9200.01	8969.57	5615.72	8043.98	10192.7
tr|Q546U1|Q546U1_HORVU	VPEDVLRDC[CAM]C[CAM]QEVANISNEWC[CAM]R	917.076	3	y7	19.9613	964.431	1	y	7	32357.9	19762.4	31431.4	29010.7	21312.3	21223	22862.8	13405.6	22215.2	31155.6	19718.3	16962	30761.2	23673.6	28347.5	22806.5	31279.4	17870.4	21189.1	28935.1	22669.9	27861.6	17455.8	17526.3	19706.3	22910.5	19548.5	12821.2	5029.79	12473	20571	29281.9	35976.7	22025	25409.3	28310
tr|Q546U1|Q546U1_HORVU	VPEDVLRDC[CAM]C[CAM]QEVANISNEWC[CAM]R	917.076	3	b10	19.9613	1244.54	1	b	10	9252.47	5253.04	7906.58	6695.21	6470.91	11998.3	3377.77	3256.47	4471.01	5746.24	5239.53	6561.03	3793.04	7029.16	10064.6	4926.12	7773.57	3961.41	5617.21	8727.32	4557.81	9266.39	4983.71	3283.26	3712.93	6340.1	3754.57	2531.81	1814.9	1128.16	6538.6	10420.5	9326.82	6528.52	9315.17	10181.9
tr|F2EGD5|F2EGD5_HORVD	C[CAM]QAVC[CAM]SMAQVIMR	777.356	2	y9	17.2496	1095.51	1	y	9	207572	211783	187584	181064	129661	201468	180303	140460	188082	253445	129714	272735	189783	158386	197342	174779	230987	95993.2	182687	128754	157482	192404	111645	81194.4	193066	201241	152102	67355	32798.3	21576.1	237169	275702	1.02964e+06	214347	229084	270215
tr|F2EGD5|F2EGD5_HORVD	C[CAM]QAVC[CAM]SMAQVIMR	777.356	2	y10	17.2496	1194.58	1	y	10	87983.6	88026.4	81259.2	78677.2	53207.6	80058	73978.5	58170.6	79196.9	105450	51601	122301	75254.8	64692.8	83742.3	73543.1	90475.3	39337	81198.2	57244.3	59246.5	80279.4	45745	35401.9	79536.4	84511.9	65609.5	24305.2	15770.9	10587.2	101778	110377	492402	89634.1	97556.4	117249
tr|F2EGD5|F2EGD5_HORVD	C[CAM]QAVC[CAM]SMAQVIMR	777.356	2	y11	17.2496	1265.62	1	y	11	118118	109701	100355	92396.1	66321.4	98585.8	91572.9	70320.4	99830.4	136098	69241.2	146638	97500.5	82488.6	106461	92641.8	116877	55171.9	97332.6	67156.6	84070.6	98459.4	60225.7	46851.3	95855.3	102980	75678	32983.3	17496.5	15566.8	127530	147082	582320	107621	119229	149137
tr|F2EGD5|F2EGD5_HORVD	C[CAM]QAVC[CAM]SMAQVIMR	777.356	2	y8	17.2496	935.48	1	y	8	88215.2	91635.3	77425.6	73695.7	55060.9	79919.9	73093	59135.7	80508.1	109240	66754	117162	82872.1	68912.9	91112.3	81311.4	103447	45220.7	83902.4	59658.4	65279.1	81254.4	48908.2	36687	92636	104104	79993.5	52361.9	28116.6	0	100942	112807	447862	85165.3	93962.9	105124
tr|F2EGD5|F2EGD5_HORVD	C[CAM]QAVC[CAM]SMAQVIMR	777.356	2	y7	17.2496	848.448	1	y	7	31213.4	35507.1	32059.8	33808.7	19610.5	27969	27016.9	22224.6	28170	42816.9	23389.2	42898.7	36050.1	24828.4	30266.6	31217.3	41952	16805.8	26898.7	21862.2	26930.8	32732.4	19968.6	13625.6	30684	31055.8	26653.2	16953	10098.8	9857.31	37798.5	45919.8	185650	35404.6	40524.2	46575.9
tr|F2EGD5|F2EGD5_HORVD	C[CAM]QAVC[CAM]SMAQVIMR	777.356	2	b10	17.2496	1135.47	1	b	10	0	0	0	0	0	0	0	0	0	0	0	0	0	0	0	0	0	0	0	0	0	0	0	0	0	0	0	0	1135.38	1518.27	0	0	0	0	0	0
tr|F2EGD5|F2EGD5_HORVD	QQQGQSFTQPQQQQSQSFGQPQQQVPVEVMR	897.433	4	b9	15.7578	1033.47	1	b	9	50082.5	58474.4	71686.6	50802.7	41516.6	42774.2	76115.9	73606.2	100359	93067.2	79024.7	101175	63436.3	69135.9	69344.1	55081	75597.5	46679	78830.9	88503.6	94325.2	90800.7	64872.2	57339.3	53022.8	51315.5	35488.8	21297.3	9938.57	12214.1	74977.8	93529	189993	64378.6	72876.2	81842.9
tr|F2EGD5|F2EGD5_HORVD	QQQGQSFTQPQQQQSQSFGQPQQQVPVEVMR	897.433	4	y11	15.7578	1310.69	1	y	11	101800	107219	108665	85212.8	67876.4	80240.2	138841	120183	187343	187984	134170	193019	115519	111587	118062	87796.8	136802	69485.6	127797	141703	160335	162829	111881	90617.6	99887.9	55011.4	38892.4	25082.1	11673.6	8813.24	143304	195895	404964	139443	149034	165640
tr|F2EGD5|F2EGD5_HORVD	QQQGQSFTQPQQQQSQSFGQPQQQVPVEVMR	897.433	4	y8	15.7578	957.519	1	y	8	57484.3	75149.7	75241.1	51986	48631	51209.3	90935.1	80902.7	126444	114932	87975.9	132715	76464	78652.1	79218.3	61581.8	91031.6	50486.1	90647.3	96075.5	108741	107141	75768.5	65383.4	47288.8	44803	36264.5	23819.5	9548.83	10148.5	78598.9	110403	243197	77293.9	86302.4	88851.7
tr|F2EGD5|F2EGD5_HORVD	QQQGQSFTQPQQQQSQSFGQPQQQVPVEVMR	897.433	4	y9	15.7578	1085.58	1	y	9	58469.7	69718.1	75175.3	55151.2	47426.1	56113.5	95179.5	87853	118715	117734	90132.3	133937	72825	76714.8	86277.3	63964.6	88072.1	55461.6	97305.3	99304.1	102147	113221	78554.4	66522.1	52606.1	46754.3	42041.3	28798.5	10011.9	11992.5	82354.9	115023	258377	71103.5	85153.5	96589.6
tr|F2EGD5|F2EGD5_HORVD	QQQGQSFTQPQQQQSQSFGQPQQQVPVEVMR	897.433	4	b8	15.7578	905.411	1	b	8	19482.1	23959.2	22287.8	17757.9	14040.6	15182.2	26877.4	23177.7	30175.7	39186.7	26906.5	35651.8	23243.2	20347.1	24777.7	20213.4	23097.2	14701.4	26285.5	27123.5	30914.9	29208.8	20396.1	17767.6	19078.8	19395.7	14466.8	8212.55	3639.55	5839.77	29236	37973.4	76357.3	26633.6	26424.9	30069.4
tr|F2EGD5|F2EGD5_HORVD	QQQGQSFTQPQQQQSQSFGQPQQQVPVEVMR	897.433	4	y22	15.7578	1277.63	2	y	22	5615.25	5165.33	8264.04	5030.93	5102.26	4333.71	9216.02	7276.73	12717.8	15618.6	0	13106.2	9057.13	8159.07	12966.5	7894.69	9266.99	5967.09	10665.8	9881.94	9488.24	11198.9	8597.99	6792.89	8092.82	6725.36	6497.45	4328.75	2219.76	2378.44	9829.14	12400.6	22652.9	6968.72	11612.9	7954.19
tr|F2EGD5|F2EGD5_HORVD	TPYVQSQMWQASGC[CAM]QLMR	724.333	3	y8	17.5999	922.423	1	y	8	81731.6	97669.7	91295.5	87454.9	69190.1	82124.8	134627	118663	147127	139670	95394.5	228807	104966	108372	113057	101345	134235	67400.6	120098	126400	150154	152166	98346.3	85419.2	116083	158025	109437	109523	89072.5	46591.3	191227	188515	815013	177151	158299	177596
tr|F2EGD5|F2EGD5_HORVD	TPYVQSQMWQASGC[CAM]QLMR	724.333	3	y7	17.5999	851.386	1	y	7	60825.9	64283.9	62340.6	60011.6	54522	60111.6	98125.9	79080.8	101212	109551	65752.4	185829	66635.5	71025.3	70827.9	65392.8	94169.5	46253.9	84804.9	88782.6	100949	111644	78117.2	56788.9	77917.2	76164.5	49572.3	32891.6	18340.2	14833.9	134367	146487	716863	142964	124180	136339
tr|F2EGD5|F2EGD5_HORVD	TPYVQSQMWQASGC[CAM]QLMR	724.333	3	y6	17.5999	764.354	1	y	6	37975.6	43817.1	47476.4	42613.3	33670.2	43600.7	61930.8	52961.4	64244.8	63951.6	48443.9	113552	41760.7	42419.7	46145.5	41660.5	56480.9	30888	54220.6	57509.7	66611.1	71865.6	48188	40347.6	41943.5	44132	33791	25463.1	13399.3	10235.3	86471.1	89019.8	432430	88503.7	78619.6	85654
tr|F2EGD5|F2EGD5_HORVD	TPYVQSQMWQASGC[CAM]QLMR	724.333	3	b8	17.5999	935.429	1	b	8	105655	97721.3	107180	95669.5	75112.5	110677	120931	118116	154295	180536	118072	179394	116757	89211.2	117151	0	119542	0	115236	125417	121543	161467	113163	81706.9	116501	108085	63637.1	49219	26531.7	0	180554	217165	456868	171108	196425	206631
tr|F2EGD5|F2EGD5_HORVD	TPYVQSQMWQASGC[CAM]QLMR	724.333	3	y9	17.5999	1050.48	1	y	9	21696.7	29681.9	28420	28213.1	19387.9	29050.5	43279.5	40855.6	45411.2	47954.4	31434.3	84833.3	36614.1	35209.6	28070.4	30981.2	45410.4	23043.2	40854.6	39506.1	49229	50722.8	34545.6	30109.1	36670.4	33757.7	22392.7	16326.7	9419.28	7417.79	66579.1	66228.5	335553	61601.9	57287.8	63111.2
tr|F2EGD5|F2EGD5_HORVD	TPYVQSQMWQASGC[CAM]QLMR	724.333	3	b7	17.5999	804.389	1	b	7	20734.5	24036.4	20429.8	21467.6	17498	22034.7	32389	30835.5	34724.9	37797.1	21435.3	57630.4	24271.6	25828.1	26807.6	26181.9	34570.1	17015.5	38160.5	30899.5	33404.8	40472.6	27949.7	22049.1	24675.6	27422.9	21622.9	16498.3	9843.67	10331.8	47161.4	49217.8	243996	44895.4	44133.5	48314.7
tr|F2EGD5|F2EGD5_HORVD	MVLQTLPSMC[CAM]SVNIPQYC[CAM]TTTPC[CAM]STITP	1067.5	3	b14	25.2128	1574.77	1	b	14	8618.32	7413.85	2398.26	7927.55	5726.24	6858.79	5342.27	5373.93	6302.65	5603.46	743.99	8270.5	8317.94	7719.42	7148.85	7566.71	10460.2	0	5289.33	5060.69	0	6801.62	482.659	4033.98	1032.61	8443.27	660.532	3444.37	382.239	0	6020.24	9452.91	30856.7	3531.37	6919.36	6823.91
tr|F2EGD5|F2EGD5_HORVD	MVLQTLPSMC[CAM]SVNIPQYC[CAM]TTTPC[CAM]STITP	1067.5	3	y14	25.2128	1626.71	1	y	14	3562.86	4138.38	3901.8	4434	3206.08	3321.21	2692.04	2574.09	3978.31	3927.8	299.737	5505.76	3535.2	3758.98	6195.3	2984.01	4360.58	737.858	3072.14	2477.96	239.529	3161.97	95.5273	1189.16	752.853	3085.98	0	1178.43	332.199	0	3106.77	4944.54	18125.2	4180.61	2879.51	4535.94
tr|F2EGD5|F2EGD5_HORVD	MVLQTLPSMC[CAM]SVNIPQYC[CAM]TTTPC[CAM]STITP	1067.5	3	b12	25.2128	1347.65	1	b	12	927.046	2291.27	13201.4	2648.34	960.867	1181.32	283.63	1031.37	854.335	2649.65	0	1873.15	1028.92	2072.33	1812.42	1594.5	2275.51	670.211	0	1278.7	0	1452.81	1779.52	0	2519.04	2827.31	741.9	509.023	0	0	1529.24	1940.94	4750.31	0	826.542	1113.1
tr|F2EGD5|F2EGD5_HORVD	MVLQTLPSMC[CAM]SVNIPQYC[CAM]TTTPC[CAM]STITP	1067.5	3	b13	25.2128	1461.69	1	b	13	2512.51	2450.21	3472.39	6420.46	2372.82	2354.18	1946.63	1672.54	2561.19	4068.33	0	4446.83	4321.45	2691.35	2745.63	5120.2	4342.82	961.198	2209.8	2418.29	0	3268.98	0	1842.71	2529.47	3427.11	671.51	1836.14	125.318	364.371	2328.47	3455.52	10981.1	1889.61	3350.67	4535.55
tr|F2EGD5|F2EGD5_HORVD	MVLQTLPSMC[CAM]SVNIPQYC[CAM]TTTPC[CAM]STITP	1067.5	3	b26	25.2128	1492.69	2	b	26	1083.21	0	4547.73	0	0	0	0	0	0	0	606.408	0	765.319	0	346.587	0	0	2758.63	0	0	405.073	388.843	0	124.351	5806.58	409.995	2487.51	0	0	244.382	563.354	0	0	0	0	205.085
tr|F2EGD5|F2EGD5_HORVD	MVLQTLPSMC[CAM]SVNIPQYC[CAM]TTTPC[CAM]STITP	1067.5	3	b10	25.2128	1161.55	1	b	10	655.472	3750.39	3613.38	1342.12	1651.46	1544.81	1254.62	698.457	0	3569.24	411.703	2331.76	0	3124.31	2106.99	0	1943.31	6152.73	769.979	0	843.148	1981.85	491.171	673.134	23560.4	0	11014.7	0	221.447	560.142	412.419	2303.68	6464.26	1429.57	0	1742.32
tr|F2EGD5|F2EGD5_HORVD	QQQMNTC[CAM]AAFLQQC[CAM]SR	985.935	2	y10	10.9559	1240.56	1	y	10	27554.8	18542.1	19010.8	15121	8774.43	13806.2	20551.4	17404.5	27544.8	40792.9	27268.7	14362.6	28788.5	17827.8	15583.7	10887.8	29144.2	9707.67	41301.3	19121.1	19855	37064.3	19413.8	13702.9	1063.61	2320.26	0	1267.59	3039.6	798.218	17098.6	14831.4	5494.43	15199.8	21056.9	23678.5
tr|F2EGD5|F2EGD5_HORVD	QQQMNTC[CAM]AAFLQQC[CAM]SR	985.935	2	y8	10.9559	1009.49	1	y	8	14618.5	10263.5	13586.7	8337.65	5192.58	12064.2	13398	13504.8	24078.5	22999.9	19407.8	13096	11936.8	9294.65	13195.9	8041.92	12416.3	6490.92	12401.5	15808.8	14881.8	17960.8	12539.1	9342.13	2654.11	2179.98	4077.63	385.524	1684.56	0	12575.1	15023.1	4172.18	9853.59	11432.2	12513.7
tr|F2EGD5|F2EGD5_HORVD	QQQMNTC[CAM]AAFLQQC[CAM]SR	985.935	2	y9	10.9559	1080.53	1	y	9	12018.1	7531.21	6491.97	7498.67	4371.55	7647.06	9751.49	10758.5	13709.3	17008.9	14524.7	7170.24	9646.86	7646.2	8101.62	8954.39	8092.87	5873.69	12697.8	10828.9	15234.7	11370.4	10335.2	7982.72	2947.75	1099.42	2759.39	489.476	1074.16	435.104	8940.3	10619.3	2771.94	7048.56	8734.54	9716.38
tr|F2EGD5|F2EGD5_HORVD	QQQMNTC[CAM]AAFLQQC[CAM]SR	985.935	2	y11	10.9559	1341.6	1	y	11	12770	4263.9	7228.72	4154.01	3908.46	5880.69	5251.77	5153.01	7319.82	11342.9	9260.99	4456.72	11603.3	6094.89	9405.88	3724.73	6236.24	2537.47	10254.1	6360.5	8757.88	14938.1	7208.57	6455.41	2227.81	0	526.724	187.349	626.329	361.796	8350.34	8690.32	0	5054.9	6048.19	7195.4
tr|F2EGD5|F2EGD5_HORVD	QQQMNTC[CAM]AAFLQQC[CAM]SR	985.935	2	b12	10.9559	1421.63	1	b	12	3709.03	2779.31	4209.09	2930.97	2193.35	0	4685.7	3035.84	5275.5	6950.67	3986.21	2025.95	4084.05	3819.41	3493.55	6020.14	4127.79	2945	6284.59	3766.08	4372.97	6037.69	2698.19	3190.28	1677.89	782.034	390.113	0	1701.47	577.326	3290	3092.53	1303.05	2534.47	2870.67	3749.04
tr|F2EGD5|F2EGD5_HORVD	QQQMNTC[CAM]AAFLQQC[CAM]SR	985.935	2	y5	10.9559	678.299	1	y	5	25408.1	15993.7	18881.9	11862.3	9915.63	16238.5	25903.1	21759.4	33797.3	41313.7	25637.8	14409.4	22022.5	14936	17494.8	15451.5	18794.6	11074.6	28171.6	20727.9	26634.1	24851.4	18120.4	16738.1	1739.8	2832.09	2479.84	1413.42	2882.67	843.006	17510.9	19514.2	5604.57	14991.8	17366.4	20322.2
tr|F2EGD5|F2EGD5_HORVD	LDTTC[CAM]SQGYGQC[CAM]QQQPQQQMNTC[CAM]AAFLQQC[CAM]SR	956.409	4	y9	14.8348	1080.53	1	y	9	6694.81	0	7059.78	42360.6	28823.7	3161.88	48328.7	32969.7	56160.1	89036.4	5114.26	48936	66661	84081.5	1360.76	66934.1	102764	35050.2	59922.9	7072.51	47613.6	59069.4	34520.1	29109.8	45915.5	0	953.025	1666.1	238.608	0	41821.8	64582.5	93848.4	38091.3	48627.5	53629.6
tr|F2EGD5|F2EGD5_HORVD	LDTTC[CAM]SQGYGQC[CAM]QQQPQQQMNTC[CAM]AAFLQQC[CAM]SR	956.409	4	y17	14.8348	1034.46	2	y	17	0	7225.53	3535.97	4395.61	3853.57	257.807	7118.67	5501.5	8914.77	12368.7	5272.32	7807.08	7293.8	4274.48	0	6057.2	6879.08	5347.36	7760.53	1088.69	7128.72	8269.33	5660.23	4446.56	3924.9	0	233.98	4553.75	2036.85	1433.32	7793.63	8632.9	17376.3	6317.58	8729.47	9633.48
tr|F2EGD5|F2EGD5_HORVD	LDTTC[CAM]SQGYGQC[CAM]QQQPQQQMNTC[CAM]AAFLQQC[CAM]SR	956.409	4	y10	14.8348	1240.56	1	y	10	5557.05	11344.9	527.07	7011.57	5476.24	3664.59	12227.5	8961.4	14042.3	17877.5	1810.58	15515.8	11121.8	8568.4	2846.5	9053.26	13953.8	5784.9	11356.4	3717.24	13614.8	13375.4	9375.49	10180.8	7079.12	7242.39	0	1020.4	0	0	10764.8	15510.9	30582.1	11380.6	11830.7	13203.6
tr|F2EGD5|F2EGD5_HORVD	LDTTC[CAM]SQGYGQC[CAM]QQQPQQQMNTC[CAM]AAFLQQC[CAM]SR	956.409	4	y8	14.8348	1009.49	1	y	8	6449.29	0	988.66	13606.4	10747.3	6271.16	29401.4	28146.4	34667.1	43816	4811.43	37244.4	19953.7	16607.6	3827.39	18616.5	26003.9	15188.1	23501	7029.82	26397	32659.4	22627.8	18864.5	16032.4	15991.4	410.187	1423.36	1091	439.688	27088	30428.5	64030.8	27146.5	31878.3	33372.4
tr|F2EGD5|F2EGD5_HORVD	LDTTC[CAM]SQGYGQC[CAM]QQQPQQQMNTC[CAM]AAFLQQC[CAM]SR	956.409	4	b14	14.8348	1627.65	1	b	14	0	1045.7	5381.5	0	0	0	0	1023.7	0	0	6093.31	0	0	0	255.423	0	0	0	0	573.381	0	0	0	0	0	0	103.958	3684.89	1249.12	1034.66	0	0	3446.71	0	0	0
tr|F2EGD5|F2EGD5_HORVD	LDTTC[CAM]SQGYGQC[CAM]QQQPQQQMNTC[CAM]AAFLQQC[CAM]SR	956.409	4	b15	14.8348	1755.71	1	b	15	772.354	1629.93	7152.54	0	0	575.576	2138.22	2102.21	3366.22	0	6907.48	3214.05	0	0	265.844	0	0	1444.65	2554.01	563.862	3400.3	2682.56	1925.49	1787.27	0	1895.82	81.0758	4762.5	1666.85	1038.82	2455.74	3357.87	6515.52	2393.85	2266.45	2106.09
tr|I6SJ26|I6SJ26_HORVU	QSSC[CAM]YVLQQQC[CAM]C[CAM]QQLPQIPEQFRHEAVR	880.169	4	y15	17.1737	924.497	2	y	15	12596.5	17153.1	4952.44	2361.47	2914.97	1716.4	2936.78	2364.89	3483.62	7574.05	5154.36	9489.59	3290.2	946.908	2408.05	0	1093.73	0	734.185	1053.1	1192.95	416.144	1054.6	0	10291.4	12419.8	9076.45	13110.7	3693.52	10975.7	4978.97	8403.91	6692.45	5847.81	6525.83	15395.1
tr|I6SJ26|I6SJ26_HORVU	QSSC[CAM]YVLQQQC[CAM]C[CAM]QQLPQIPEQFRHEAVR	880.169	4	y18	17.1737	1148.56	2	y	18	9216.69	13182.6	5479.72	2296.38	3528.13	2925.51	0	2414.06	3891.86	8294.74	4058.77	8072.5	4214.5	2313.46	0	4421.67	1520.08	426.346	606.225	0	767.426	1763.55	1476.49	0	11393.5	14584.5	5983.73	1981.7	1633.48	2089.16	7926.31	9510.94	8594.38	8116.15	7328.6	8294.21
tr|I6SJ26|I6SJ26_HORVU	QSSC[CAM]YVLQQQC[CAM]C[CAM]QQLPQIPEQFRHEAVR	880.169	4	y17	17.1737	1068.54	2	y	17	5941.76	0	5247.34	3110.03	0	4058.46	0	0	0	0	0	0	0	0	29609.4	0	3489.28	0	2602.65	0	0	0	0	21252.2	6907.29	11082.7	3619.99	2346.13	0	3010.62	4347.84	6424.94	3672.07	4516.69	4989.73	0
tr|I6SJ26|I6SJ26_HORVU	QSSC[CAM]YVLQQQC[CAM]C[CAM]QQLPQIPEQFRHEAVR	880.169	4	y22	17.1737	931.794	3	y	22	1184.79	2322.23	1114.57	0	660.427	0	125.298	619.244	566.911	1069.9	1092.32	1626.33	699.062	342.582	0	1290.83	0	131.998	114.12	288.166	0	164.731	366.296	0	1609.82	1840.56	873.414	0	253.385	0	1519.4	2186.68	1106.66	988.335	1886.14	1970.52
tr|I6SJ26|I6SJ26_HORVU	QSSC[CAM]YVLQQQC[CAM]C[CAM]QQLPQIPEQFRHEAVR	880.169	4	b8	17.1737	966.435	1	b	8	4846.73	0	4045.4	700.974	2380.38	907.322	0	2186.39	2532.84	3892.02	2685.47	0	2185.18	0	3948.48	9112.04	1688.69	1253.87	528.661	1727.3	354.892	0	0	2153.4	5851.47	5915.77	4113.19	848.194	3438.36	904.908	4014.36	5767.26	3912.93	2855.45	2024.13	0
tr|I6SJ26|I6SJ26_HORVU	QSSC[CAM]YVLQQQC[CAM]C[CAM]QQLPQIPEQFRHEAVR	880.169	4	y20	17.1737	1276.62	2	y	20	0	5425.25	0	6853.73	0	11193.3	2823.63	2833.15	0	0	0	0	0	11495.4	9563.12	0	0	0	1041.25	0	11860.8	4754.1	2298.44	4235.08	0	4228.61	1489.66	0	1292.29	1059.12	0	6995.04	0	4064.65	3090.42	1876.79
tr|I6SJ26|I6SJ26_HORVU	AIVYSIVLQEQPQQ	808.438	2	y7	19.7214	870.432	1	y	7	28471.9	22310.6	18348.5	16292.8	13293.8	28909.8	12128.5	9669.76	4169.14	15028.6	11455	12539.9	10641.7	0	5727.46	8681.08	8995.34	0	0	0	3663.94	3242.23	0	0	20699.9	21466.1	11042.4	10971.2	606.389	7703.35	11526.4	14319.4	17490.2	10218.9	12843	13727.9
tr|I6SJ26|I6SJ26_HORVU	AIVYSIVLQEQPQQ	808.438	2	b11	19.7214	1244.69	1	b	11	12053.1	8795.05	8470.15	6966.39	4787.38	8287.03	8281.51	7012.49	0	11499.3	6551.37	7167.48	5466.87	618.502	3673.56	5512.23	5405.42	0	844.327	154.62	3480.27	3650.99	212.97	370.63	8364.37	11736.7	6673.15	4924.19	2100.46	6914.34	9897.77	9723.13	12787.8	5814.11	6321.31	8451.39
tr|I6SJ26|I6SJ26_HORVU	AIVYSIVLQEQPQQ	808.438	2	b10	19.7214	1116.63	1	b	10	19277.3	13077.8	10409.9	12272.7	6646.17	14011.7	6533.4	6413.23	163.218	11673.7	6545.79	7342.33	7444.21	565.256	3098.98	4356.91	4847.01	593.792	261.903	133.991	1572.99	2412.24	99.1162	289.474	13440.6	16340	7882.34	7001.92	2206.13	7177.97	7886.87	8359.24	10135.5	7264.6	6677.01	8500.2
tr|I6SJ26|I6SJ26_HORVU	AIVYSIVLQEQPQQ	808.438	2	y8	19.7214	969.5	1	y	8	20511.5	14552.8	10982.4	9066.57	8432.55	10772.3	6264.47	7414.01	13355.5	8998.31	8992.17	8150.7	4300.45	1183.34	5172.53	4937.32	5836.6	2394.89	4344.97	0	2479.96	2712.81	0	0	11656.4	20779.2	9092.34	6495.61	8592.65	6482.93	8603.24	10954.7	13969.1	8759.66	6833.61	12317.5
tr|I6SJ26|I6SJ26_HORVU	AIVYSIVLQEQPQQ	808.438	2	b8	19.7214	859.529	1	b	8	20999.9	14251.9	12043.6	10893.6	8026	13398.8	9984.96	6405.46	0	13543.4	7057.72	9267.15	6758.46	1730.05	4685.59	6254.07	6847.76	531.794	709.342	168.592	2179.16	2750.58	487.092	531.339	14756	24630	9006.72	5798.02	327.268	6994.69	10376	13028.2	13197.6	8469.45	8095.33	9469.25
tr|I6SJ26|I6SJ26_HORVU	AIVYSIVLQEQPQQ	808.438	2	b9	19.7214	987.587	1	b	9	7068.71	6245.94	7500.27	5153.84	3791.97	6209.46	3497.13	3285.17	1218.11	6055.93	3902.17	4126.3	2494.86	1117.19	2058.94	2450.91	2054.9	286.186	204.782	409.032	1350.24	1378.04	308.258	112.481	5369.55	8573.47	5246.71	2976.52	3654.65	2840.77	3735.37	5242.98	5627.67	3944.31	3879.26	4053.78
tr|I6SJ26|I6SJ26_HORVU	AIVYSIVLQEQPQ	744.409	2	b8	20.1048	859.529	1	b	8	13388.2	8831.74	8467.11	9020.5	6388.45	10680.4	9903.5	6473.98	11037.1	11297.6	548.927	8590.71	2811.89	1093.04	2456.35	3606.94	783.86	2992.79	1655.12	222.41	1103.44	323.327	1478.45	690.998	13085.6	12752	14279.1	22962.4	23304.8	7625.35	7735.31	10905.8	10493.3	8386.01	7745.35	11682.9
tr|I6SJ26|I6SJ26_HORVU	AIVYSIVLQEQPQ	744.409	2	b10	20.1048	1116.63	1	b	10	13036.2	8474.29	7199.43	8407.21	5916.17	11344.2	8145.81	7913.01	11044	13703.5	0	7086.95	5639.49	0	0	1749.91	0	495.436	2450.12	0	0	683.344	2560.1	299.396	11935.7	18585.9	0	0	0	2337.12	8827.69	10251.9	10934.8	8973.27	6672.44	9421.33
tr|I6SJ26|I6SJ26_HORVU	AIVYSIVLQEQPQ	744.409	2	y7	20.1048	841.441	1	y	7	0	0	0	0	0	0	0	0	0	0	3328.97	0	0	0	6905.7	0	1384.76	8474.45	0	2380.63	2680.81	1603.66	0	0	0	16958.3	2511.23	2926.34	2049.54	1832.17	0	0	0	0	0	0
tr|I6SJ26|I6SJ26_HORVU	AIVYSIVLQEQPQ	744.409	2	b9	20.1048	987.587	1	b	9	8030.14	4303.21	3586.83	3677.29	2131.78	4118.13	3352.29	4052.47	4582.51	6062.4	2786.72	4047.63	1632.2	847.597	11061.2	10149.4	737.868	6895.67	0	164.806	1655.71	0	973.497	871.05	6365.5	6951.63	33653.1	43564.7	35306.5	8655.11	4667.65	4377.97	6636.15	3633.65	4250.7	5661.35
tr|I6SJ26|I6SJ26_HORVU	AIVYSIVLQEQPQ	744.409	2	b11	20.1048	1244.69	1	b	11	11207.8	9831.19	7960.99	7005.98	4902.09	6201.64	6996.98	6329.79	8505.67	12158.5	873.717	6884.26	6010.91	396.074	1625.76	1476.76	2238.36	510.063	1887.86	159.375	851.908	747.075	1560.4	312.109	11581.7	10236.1	2770.02	0	2316.54	682.653	8189.52	8764.46	10130.9	8433.39	6831.8	10165.6
tr|I6SJ26|I6SJ26_HORVU	AIVYSIVLQEQPQ	744.409	2	y10	20.1048	1204.62	1	y	10	6042.99	4229.29	2615.93	4362.97	2763.74	3731.09	1356.04	0	3542.49	3383.31	0	1694.6	2410.77	3223.32	0	981.709	8358.35	421.352	422.693	3073.63	131.372	8595.2	312.128	702.916	3193.28	6602.16	0	0	0	2132.16	2574.85	0	2808.77	2770.82	3721.36	0
tr|I6SJ26|I6SJ26_HORVU	QSSC[CAM]YVLQQQC[CAM]C[CAM]QQLPQIPEQFR	975.786	3	y8	19.4465	1014.54	1	y	8	55854.8	57503.9	38006.9	22913.1	4076.45	36810.5	39570.3	22128.7	33543.4	53192.9	29457.9	28751.2	26765.9	28705.7	23453.5	29815.8	5961.22	6125.57	6770.68	8022.69	7271.24	14434.4	4739.06	5401.92	38641.4	45018.6	18908	2504.03	6575.06	8304.56	25121.8	23731.3	31548	23399.9	23600.3	31761.1
tr|I6SJ26|I6SJ26_HORVU	QSSC[CAM]YVLQQQC[CAM]C[CAM]QQLPQIPEQFR	975.786	3	b18	19.4465	1125.51	2	b	18	0	0	0	0	1272.66	0	0	0	0	0	0	0	0	0	0	0	0	736.563	244.906	485.135	214.248	0	0	0	0	0	0	610.556	0	0	0	0	0	0	0	0
tr|I6SJ26|I6SJ26_HORVU	QSSC[CAM]YVLQQQC[CAM]C[CAM]QQLPQIPEQFR	975.786	3	y9	19.4465	1127.62	1	y	9	7904.77	6995.8	5236.92	4097.44	0	3457.75	0	3117	3265.35	5965.69	4299.09	3839.87	0	4435.46	0	4837.74	1921.71	166.445	1023.26	1076.34	1381.83	0	711.021	491.509	5467.07	4543.38	3954.41	3530.05	0	2392.73	3771.89	4260.58	4286.11	2770.74	3912.97	4985.11
tr|I6SJ26|I6SJ26_HORVU	QSSC[CAM]YVLQQQC[CAM]C[CAM]QQLPQIPEQFR	975.786	3	b10	19.4465	1222.55	1	b	10	0	0	0	0	3171.43	0	0	0	0	0	0	0	0	0	0	0	0	255.536	0	0	0	0	0	0	0	0	0	469.973	0	0	0	0	0	0	0	0
tr|I6SJ26|I6SJ26_HORVU	QSSC[CAM]YVLQQQC[CAM]C[CAM]QQLPQIPEQFR	975.786	3	y5	19.4465	676.341	1	y	5	54372.6	43631	37852.7	27094.8	2235.76	31673.6	120795	20828	30909	47090.7	28094.3	25712.9	65264.3	61655.2	76579.8	72962.1	4294.95	7010.15	9418.86	5640.05	6194.78	78311.7	3723.1	4587.3	37270.2	41197.5	15961.8	0	4598.51	9932.62	23126.2	18829.3	27050.3	18791.3	20020	22243.5
tr|I6SJ26|I6SJ26_HORVU	QSSC[CAM]YVLQQQC[CAM]C[CAM]QQLPQIPEQFR	975.786	3	y5	19.4465	226.119	3	y	5	7119.66	8110.59	6834.56	3917.84	19086.1	6963.38	23124.5	2856.3	0	7137.89	3056.15	4231.95	34494.6	28558.8	28605.6	24808.2	0	0	0	0	0	18634.3	0	0	6099.67	8298.67	25191.2	0	17327.5	1665.96	2808.35	0	2682.48	3537.54	0	4305.36
tr|I6SJ26|I6SJ26_HORVU	QPQPQQGQQQQVPQSVFLQPLQLAQLEATASIALR	968.022	4	y34	34.6426	1247.67	3	y	34	6469.74	4806.73	5359.69	4546.98	2425.72	6629.11	100.233	2075.92	2142.6	2109.32	1618.18	439.475	0	0	676.917	371.505	700.919	322.601	899.716	1252.99	214.246	923.358	172.35	0	2806.5	3701.83	1554.26	1288.43	0	1650.43	2326.29	3348.09	1802.95	2101.17	2626.77	3263.57
tr|I6SJ26|I6SJ26_HORVU	QPQPQQGQQQQVPQSVFLQPLQLAQLEATASIALR	968.022	4	b12	34.6426	1375.67	1	b	12	0	0	0	0	0	0	1085.31	0	0	8570.53	0	424.423	383.612	919.113	122.37	1931.12	2732.85	661.024	141.612	124.618	1939.6	532.308	654.384	1494.96	0	0	4427.49	0	1579.42	2037.24	0	0	6998.52	0	0	6426.5
tr|I6SJ26|I6SJ26_HORVU	QPQPQQGQQQQVPQSVFLQPLQLAQLEATASIALR	968.022	4	y16	34.6426	1694.98	1	y	16	31875.9	20304.2	21143.3	17643.5	9957.98	21866	134.806	7041.33	7637.64	11335.2	6521.22	173.739	195.939	144.757	77.6484	1199.15	532.076	203.959	0	414.249	1397.12	0	843.361	299.756	14474.2	16019.9	7425.07	5719.39	3526.26	2107.4	9098.4	8892.56	7863.29	5418.79	7360.69	7804.63
tr|I6SJ26|I6SJ26_HORVU	QPQPQQGQQQQVPQSVFLQPLQLAQLEATASIALR	968.022	4	y12	34.6426	1243.7	1	y	12	21974.2	16969	15000.6	15058.1	7054.81	17258	300.476	5186.05	6786.37	13616.8	6186.02	1658.02	4088.11	4929.15	0	1688.3	2148.94	2656.3	248.913	692.382	1275.75	214.391	140.574	1112.25	12469.5	14539.8	10078.8	4733.37	6910.29	7651.75	7937.66	7791.2	6186.9	4931.82	7270.62	8769.92
tr|I6SJ26|I6SJ26_HORVU	QPQPQQGQQQQVPQSVFLQPLQLAQLEATASIALR	968.022	4	y32	34.6426	1172.64	3	y	32	25298.3	18597	19073.9	14268.1	8221.09	19365.7	535.525	6433.43	6176.58	4893.12	6273.24	0	261.713	696.617	444.034	667.119	1791.91	239.063	1728.65	311.59	324.287	429.502	128.302	284.159	9854.69	9390.14	3329.86	2977.47	2129.73	2348.12	7267.01	7287.77	0	4992.77	7245.43	0
tr|I6SJ26|I6SJ26_HORVU	QPQPQQGQQQQVPQSVFLQPLQLAQLEATASIALR	968.022	4	y10	34.6426	1044.6	1	y	10	29813.9	21042.6	16416.5	16870.3	9707.92	21528	0	6651.6	8091.41	5603.34	7134.83	0	0	161.295	0	630.977	0	351.414	1236.23	303.49	592.263	289.015	0	418.837	16404.1	17543.2	3434.52	6456.76	4839.53	3929.91	9793.6	9387.69	0	5955.91	9154.25	4078.76
tr|I6SJ26|I6SJ26_HORVU	QVPQSVFLQPLQLAQLEATASIALR	907.848	3	y10	32.9137	1044.6	1	y	10	1399.45	5978.3	5028	413.777	3974.59	2379.49	402.546	2469.85	342.82	2142.76	0	345.122	0	0	2410.8	91.0826	151.248	55.8496	173.573	82.8744	158.449	5289.99	165.854	0	927.635	12173.5	0	0	2293.37	0	4703.38	4398.09	7336.99	0	4563.97	4398.47
tr|I6SJ26|I6SJ26_HORVU	QVPQSVFLQPLQLAQLEATASIALR	907.848	3	b9	32.9137	1027.56	1	b	9	654.512	5410.5	1964.47	722.302	0	4588.62	399.614	1559.06	0	463.595	1352.78	234.702	2317.47	0	0	0	593.203	1320.44	506.496	0	417.915	1576.3	414.042	159.38	283.633	5439.53	2874.6	1290.43	1066.61	766.82	3800.7	2955.61	0	473.838	2889.47	4420.55
tr|I6SJ26|I6SJ26_HORVU	QVPQSVFLQPLQLAQLEATASIALR	907.848	3	y9	32.9137	931.521	1	y	9	903.891	3141.17	7372.05	931.506	2314.36	8233.1	1533.76	3753.97	551.173	4585.15	282.196	0	238.901	0	452.475	233.541	423.46	412.839	726.237	0	86.5793	1786.93	47.5791	458.191	2767.87	12347	7400.66	5046.61	2857.09	1586.77	8153.16	6532.77	10414.7	1781.5	5187.41	5596.3
tr|I6SJ26|I6SJ26_HORVU	QVPQSVFLQPLQLAQLEATASIALR	907.848	3	y11	32.9137	1172.66	1	y	11	817.149	3295.36	3637.78	742.872	2094.83	2370.71	0	1852.47	446.42	1445.2	130.816	1386.4	566.875	153.153	263.787	606.529	0	326.445	115.735	0	116.794	311.942	111.609	0	173.287	7193.81	1838.55	2335.89	5016.11	579.476	3154.57	3150.79	3339.82	929.717	3147.45	3232.35
tr|I6SJ26|I6SJ26_HORVU	QVPQSVFLQPLQLAQLEATASIALR	907.848	3	y12	32.9137	1243.7	1	y	12	842.841	3578.32	2750.83	2727.32	1359.59	2246.66	117.201	2817.8	325.16	2025.75	463.978	172.335	836.845	646.273	0	293.282	148.385	0	0	103.547	81.713	132.824	268.6	171.819	0	5932.56	3144.04	2391.9	2645.96	568.96	2593.69	5969.94	3917.99	1055.46	3653.58	2169.19
tr|I6SJ26|I6SJ26_HORVU	QVPQSVFLQPLQLAQLEATASIALR	907.848	3	y14	32.9137	1484.84	1	y	14	0	604.554	1621.2	249.512	688.984	622.606	165.938	276.012	96.9969	1787.67	81.7029	64.9971	148.413	51.8024	387.473	359.33	0	318.653	190.266	152.198	107.518	0	0	79.3665	200.783	0	929.763	163.575	350.451	419.665	915.254	829.561	562.833	245.511	1033.55	577.719
tr|F2EAF6|F2EAF6_HORVD	IVDQC[CAM]ANGGLDLDWDTVFTK	1134.04	2	y14	24.4223	1580.76	1	y	14	0	0	0	0	26134.4	45886.3	43993	0	44663.5	0	33937	56821.2	41987.7	0	0	0	32817.1	0	0	0	0	0	22449.5	0	49193.9	0	23565.7	22331.8	17803.5	146.643	0	47746.1	55593.7	41517.3	46358.4	52619.3
tr|F2EAF6|F2EAF6_HORVD	IVDQC[CAM]ANGGLDLDWDTVFTK	1134.04	2	y13	24.4223	1466.72	1	y	13	239414	196106	205616	158567	30967.3	39835.3	44535.2	98124.3	45052.2	223932	31099.2	46034.3	40202.6	133388	148290	96436.4	29564.5	66713.3	104122	91135.8	99177.5	135963	22574.2	58402.7	54396.8	128353	30562.5	24345.7	18341.1	5397.02	118783	59156.3	67146.7	44058.2	45477.9	55140.3
tr|F2EAF6|F2EAF6_HORVD	IVDQC[CAM]ANGGLDLDWDTVFTK	1134.04	2	y10	24.4223	1239.59	1	y	10	244718	161209	196610	159093	32350	53878.2	50791.7	99648.8	49359.7	234941	42172.2	43598.6	47792.6	134056	144228	91882.4	38977.1	66020.3	89850.3	93459.7	102539	123210	24849	57154.7	66318	141487	37368.5	32950.5	29701.2	1348.77	110874	66579.3	70426.5	51362.4	56472.2	70079.6
tr|F2EAF6|F2EAF6_HORVD	IVDQC[CAM]ANGGLDLDWDTVFTK	1134.04	2	y12	24.4223	1409.69	1	y	12	139654	118381	137435	98061.7	15033.2	19824.3	21480.2	65546.6	21082.4	146913	14480.9	23972.5	16104.6	84718	93910.4	64635.8	17575.9	41614.3	63924.7	64080.8	65344.8	79421.5	11899.6	38810.1	27864.2	84079.8	14114	14887.1	27918.4	0	74757.3	31893.9	31378.2	23127.6	21413.6	24321.2
tr|F2EAF6|F2EAF6_HORVD	IVDQC[CAM]ANGGLDLDWDTVFTK	1134.04	2	y11	24.4223	1352.67	1	y	11	72746.9	63007.7	65508.9	57009.4	11052.4	16589	15391	35040.3	15455.3	80833	10553.9	18031.6	14435	40358	41835.8	32462.1	10219.6	21374.7	33773.6	29905.7	33307.4	45797.6	8379.88	19270.2	21198.1	38311.4	11139	13195	9063.53	1212.37	36640.5	22713.3	20769.8	18824.6	17706.1	24956.7
tr|F2EAF6|F2EAF6_HORVD	IVDQC[CAM]ANGGLDLDWDTVFTK	1134.04	2	b13	24.4223	1371.62	1	b	13	0	0	0	0	8767.89	11012.8	10078.7	0	12184.1	0	9667.03	11772.8	11588.4	0	0	0	8085.51	0	0	0	0	0	7228.18	0	10361.6	0	5510.33	6375.9	3715.35	915.095	0	18065.7	15649.2	12214.3	15992.5	18759.4
tr|F2EAF6|F2EAF6_HORVD	IDTNGIGYQQGHLNVNYQFVDC[CAM]RD	942.768	3	y18	17.4492	1107	2	y	18	252508	362610	242635	210919	152574	186557	183674	162794	215233	239156	167339	219012	186023	159449	182719	131093	160231	97092.6	150669	238691	172716	179268	142724	179729	197870	280283	94621.3	61281.3	35109.2	18926.9	196658	195381	243517	189603	179801	316639
tr|F2EAF6|F2EAF6_HORVD	IDTNGIGYQQGHLNVNYQFVDC[CAM]RD	942.768	3	y20	17.4492	1192.05	2	y	20	95209	93846.7	134637	75006.1	53869.4	99589.1	68799.3	60889.8	84063.1	94437.1	63977.8	83285.4	70801.6	64396.2	67950.7	86228	60069.9	37743.6	57380.8	48856.6	62094.1	66962.8	50482.5	46717	74503	105335	66401.8	42812	12893.5	17828.1	72798.9	71182.4	91298.9	100856	101898	111523
tr|F2EAF6|F2EAF6_HORVD	IDTNGIGYQQGHLNVNYQFVDC[CAM]RD	942.768	3	y9	17.4492	1216.51	1	y	9	318143	449714	300708	395901	183543	219785	347789	301820	390729	319350	218194	294333	362702	198152	235011	255939	318794	112540	191567	289298	212872	222591	176863	146084	238686	335168	121480	127310	32483.7	43945.1	247333	353727	434751	335976	330455	375467
tr|F2EAF6|F2EAF6_HORVD	IDTNGIGYQQGHLNVNYQFVDC[CAM]RD	942.768	3	y11	17.4492	1429.62	1	y	11	242538	248980	241139	307339	139946	176943	178306	235198	215822	257930	167319	227725	178816	240219	174858	206634	150191	92977.3	152750	217586	171156	171040	134042	180187	259703	259277	91007.5	100545	43717.4	32505.5	188417	274372	346278	269769	176680	288949
tr|F2EAF6|F2EAF6_HORVD	IDTNGIGYQQGHLNVNYQFVDC[CAM]RD	942.768	3	y8	17.4492	1102.46	1	y	8	238009	335997	239288	204139	137896	168940	175823	152558	304274	243967	163034	222428	284220	156016	175020	208258	242529	89398.7	148049	224564	165834	171184	130377	170804	259577	248349	89891	100018	44121.6	39274.2	184708	261049	230055	251371	254790	271462
tr|F2EAF6|F2EAF6_HORVD	IDTNGIGYQQGHLNVNYQFVDC[CAM]RD	942.768	3	y19	17.4492	1163.54	2	y	19	57131.9	55575	77101.8	49937.7	29788.1	66338.7	38819	54721.5	65206.8	58568.9	35818.2	69189	58216.8	30389.2	37733.3	26903.4	34723.2	31232.2	32080.4	42118.3	35742.2	37031.1	31553.6	25379.3	45611.9	42840.7	24140.7	18408	8405.72	6232.42	43021.2	60777.5	54010.9	55813.7	36056	60009.7
tr|F2EAF6|F2EAF6_HORVD	IVDQC[CAM]ANGGLDLDWDTVFTK	756.36	3	b11	24.7252	1143.51	1	b	11	128093	0	0	0	84518.7	0	118143	111551	127876	140500	112010	0	0	110968	0	88396.9	0	66742.2	72546.7	91395.7	104899	119764	92835.9	76845.1	131697	126292	0	58788.7	35355.8	27762.9	137060	128882	161542	125190	0	137227
tr|F2EAF6|F2EAF6_HORVD	IVDQC[CAM]ANGGLDLDWDTVFTK	756.36	3	y7	24.7252	896.451	1	y	7	213368	731546	814455	673076	120983	371952	191443	146636	168662	217595	147443	851136	745097	133438	739493	123290	641964	93523	95968.6	0	133388	146601	108019	112379	203574	210331	307526	79775.2	62259.3	27434.8	194226	189533	231252	205105	646023	198186
tr|F2EAF6|F2EAF6_HORVD	IVDQC[CAM]ANGGLDLDWDTVFTK	756.36	3	y8	24.7252	1011.48	1	y	8	300552	519880	915769	494451	154597	403989	241811	181197	205614	259750	184725	959002	795612	175585	591045	163281	744965	124114	130184	144028	173682	188765	138346	144494	268239	258529	399524	96786.3	77542.9	39474.1	249266	240597	304484	264348	725865	243822
tr|F2EAF6|F2EAF6_HORVD	IVDQC[CAM]ANGGLDLDWDTVFTK	756.36	3	y10	24.7252	1239.59	1	y	10	121675	227569	258065	214803	69944.8	157117	105885	82549.4	86675.3	123757	77152.9	271853	230080	74365.6	391563	62234.2	183465	53106.5	54480.3	71076.4	70453.3	78634.3	70278.5	62869.4	106427	110524	148707	41066.3	30723.4	0	110026	105011	129964	115670	206744	106396
tr|F2EAF6|F2EAF6_HORVD	IVDQC[CAM]ANGGLDLDWDTVFTK	756.36	3	y9	24.7252	1124.56	1	y	9	76284.2	154308	184210	153202	43411.6	105605	55608.6	51302.9	58869	78375.5	59483	204729	169599	45877.7	267473	44433.6	140842	34758	33747.8	48718.3	48940.2	53020.7	36876.7	38979.4	72233.6	74264.6	108779	31346.2	25267.8	0	73677.6	71005.5	85036.5	74097.5	155352	73017.3
tr|F2EAF6|F2EAF6_HORVD	IVDQC[CAM]ANGGLDLDWDTVFTK	756.36	3	b9	24.7252	915.399	1	b	9	121431	0	0	0	74832.5	0	105249	67056.9	75999	97407.2	59794.9	0	0	88588.3	0	73302.1	0	55490.5	58145	77011.9	92739.1	68254.4	51326.8	49766.2	112433	104387	0	61949.2	32496.2	24017.6	87804.8	99088.8	114393	103848	0	104308
tr|F2EAF6|F2EAF6_HORVD	GGLDLDWDTVFTK	733.862	2	y8	25.1044	1011.48	1	y	8	10997.8	50121.2	25714.2	13323.5	1964.26	0	29808.5	23015.7	14628.1	21311.6	14646.3	14867.3	11779.5	11778.7	11432.6	9416.19	30977.8	6009.89	8983.52	9115.43	22093.3	26803.6	8972.06	10038	26181.1	14974.9	4694.03	4686.87	2435.52	3971.98	0	10586.4	22251.1	3098.92	10839.5	23360.3
tr|F2EAF6|F2EAF6_HORVD	GGLDLDWDTVFTK	733.862	2	y7	25.1044	896.451	1	y	7	19904.1	22047.9	21224	9945.78	2144.74	18961.5	20075.8	13583.1	11341.1	14177.5	9128.66	16645.3	10610.2	9593.37	14179	18769.9	22616.2	4562.54	9963.92	9890.87	10622.7	16830.9	6249.09	6074.11	17189.5	0	2807.75	4361.26	1836.1	577.301	17049.5	8982.99	12634	3641.8	7896.53	13731.4
tr|F2EAF6|F2EAF6_HORVD	GGLDLDWDTVFTK	733.862	2	y9	25.1044	1124.56	1	y	9	116227	13936.3	4685.95	3786.35	1438.45	111328	6253.23	7015.55	4914.72	8070	2763.17	4606.68	3542.04	4517.53	3052.46	84337.8	9389.69	2589.63	2852.6	2279.87	6896.86	9345.3	3550.55	1565.66	4939.07	4997.08	0	2116.2	956.954	0	86046.3	4666.53	10363.5	1140.34	2908.18	0
tr|F2EAF6|F2EAF6_HORVD	GGLDLDWDTVFTK	733.862	2	y10	25.1044	1239.59	1	y	10	55520.5	9317.48	7551.76	4846.92	0	58403.8	7238.66	5506.59	6318.22	9385.88	3656.3	3943.46	3055.44	3082.24	4812.52	36323.9	15961.4	4097.78	3342.04	3119.56	5032.44	6083.26	2830.24	3423.04	6261.12	6453	1669.11	1647.22	1535.09	798.269	36046.2	3723.68	7039.91	757.752	5232.88	6196.62
tr|F2EAF6|F2EAF6_HORVD	GGLDLDWDTVFTK	733.862	2	b10	25.1044	1072.49	1	b	10	0	14804.9	0	0	1557.44	0	7374.6	7254.22	0	0	0	0	184.935	0	0	0	10504.1	0	0	569.5	4647.13	8395.96	0	0	8533.14	0	0	607.912	1466.71	2282.45	0	0	0	766.196	0	7134.64
tr|F2EAF6|F2EAF6_HORVD	GGLDLDWDTVFTK	733.862	2	y5	25.1044	595.345	1	y	5	9607.15	6029.58	4410.73	4902.66	1493.6	9070.78	13702.1	5751.64	4314.3	4404.13	0	6606.17	3554.31	3200.32	2091.22	4589.99	8183.74	1669.86	3708.03	2579.85	4294.86	8329.65	2680.9	1573.96	10002.3	0	1484.74	0	973.79	0	6823.93	3925.21	4789.68	0	3623.39	3563.1
tr|F2EEV5|F2EEV5_HORVD	FAQSQQDFFEQFGVSIGK	688.334	3	y7	23.9038	707.409	1	y	7	11815.9	9349.26	7080.43	6220.84	6072.43	10802.3	5191	7066.67	486.412	18088.9	4524.61	8966.95	410.09	3135.78	0	0	1433.38	847.879	647.426	3882.57	734.4	2781.45	0	0	46140.1	50081.8	31060.9	22428.6	14531.9	4514.94	44013.9	38592.8	51514.7	42540.4	42496.3	52576.5
tr|F2EEV5|F2EEV5_HORVD	FAQSQQDFFEQFGVSIGK	688.334	3	y9	23.9038	964.51	1	y	9	7131.38	7650.34	14323.5	4187.44	5212.07	6568.41	5422.9	2907.02	0	10988.8	4048.06	9559.78	774.627	2262.48	1249.59	5485.52	0	2354.14	0	3016.8	3462.51	0	232.102	2432.2	27356.8	30192.1	20085.1	15468.8	9998.42	3312.97	26694.6	22543.9	26542.1	27866.4	23944.4	25858.2
tr|F2EEV5|F2EEV5_HORVD	FAQSQQDFFEQFGVSIGK	688.334	3	b7	23.9038	805.348	1	b	7	10879.1	8331.62	5043	10348.5	4698.28	8055.43	3262.58	2681.49	2818.29	11763.1	6254.01	6099.22	1094.08	427.503	393.898	1681.13	3582.51	2126.16	0	594.33	1019.05	1661.63	4477.46	0	28836.7	28938.3	13970.3	12444.3	7842.58	1005.61	25432	24395.9	27002.5	25419.8	19866.9	26963.1
tr|F2EEV5|F2EEV5_HORVD	FAQSQQDFFEQFGVSIGK	688.334	3	b8	23.9038	952.416	1	b	8	7217.63	5691.12	4555.19	3124.22	4526.69	4948.58	3349.3	2224.95	1009.88	13718.3	3792.3	5035.17	2189.75	778.162	638.021	0	2490.71	1372.76	0	496.884	0	1037.23	0	768.04	24563.5	27733.8	16640.6	9305.46	7994.36	416.365	22118.5	21086.9	27039.6	23036.3	19565.7	27375.5
tr|F2EEV5|F2EEV5_HORVD	FAQSQQDFFEQFGVSIGK	688.334	3	y8	23.9038	835.467	1	y	8	9413.97	7884.45	1971.84	7207.46	3989.55	6382.48	4946.21	4064.95	0	10930.7	2659.21	7290.73	1570.13	1230.44	0	576.68	0	2387.1	17273	155.526	242.813	803.294	860.065	244.965	23472.2	33481.6	17451.1	14538.8	10256.3	1567.05	27626.5	25908.2	33673.4	24652	24336.6	28890.7
tr|F2EEV5|F2EEV5_HORVD	FAQSQQDFFEQFGVSIGK	688.334	3	b12	23.9038	752.331	2	b	12	3602.45	0	1210.94	0	0	0	1687.19	1448.96	979.441	2297.89	1134.81	777.591	0	6817.41	673.522	5665.08	1979.2	893.658	1924.9	7018.16	1371.52	2357.12	687.081	742.736	6337.31	5705.63	5254.52	3438.68	1238.21	745.137	3754.13	3451.84	4652.64	5034.91	4980.55	4541.51
tr|F2EEV5|F2EEV5_HORVD	FAQSQQDFFEQFGVSIGK	1032	2	y12	23.9184	1373.67	1	y	12	8246.74	4340.15	2737.97	787.022	0	262.818	712.522	704.214	7259.43	2799.22	0	1637.22	3061.87	1279.3	10256.7	1383.2	6319.48	682.039	12647.7	14061.1	17028.7	2775.32	871.789	9319.45	6846.68	9478.22	5374.65	3151.2	5384.77	222.836	5926.89	3884.21	7342.1	5645.25	10294.4	7486.85
tr|F2EEV5|F2EEV5_HORVD	FAQSQQDFFEQFGVSIGK	1032	2	b14	23.9184	1659.74	1	b	14	5406.35	0	0	817.232	3053.95	471.002	237.105	0	5185.74	1645.5	2933.62	0	2373.24	2000.11	0	253.782	9252.08	635.916	0	0	0	2102.9	567.249	885.426	1468.48	1201.45	815.742	208.799	340.075	0	1403.21	5274.38	847.763	814.139	841.77	0
tr|F2EEV5|F2EEV5_HORVD	FAQSQQDFFEQFGVSIGK	1032	2	y13	23.9184	1501.73	1	y	13	0	4556.73	1493.6	2042.14	590.54	0	1219.68	1066.29	0	707.034	0	1776.42	3961.97	1290.42	10434	0	550.384	767.397	10775.8	8801.4	9286.7	2955.68	532.442	5914.29	6427.28	7995.85	3991.47	2873.92	2185.43	1079.2	5059.25	838.426	7254.22	5095.75	5164.71	7025.96
tr|F2EEV5|F2EEV5_HORVD	FAQSQQDFFEQFGVSIGK	1032	2	y15	23.9184	1716.82	1	y	15	1024.82	1329.29	1442.73	1213.42	648.257	1710.56	224.658	702.22	0	2974.92	211.292	1521.92	2470.85	0	11564.8	1161.56	672.959	0	8732.76	7419.07	5937.44	0	382.248	4287.81	5325.05	7847.75	2619.63	2585.15	1534.4	2504.26	4448.58	0	7256.81	3873.89	4276.14	4579.63
tr|F2EEV5|F2EEV5_HORVD	FAQSQQDFFEQFGVSIGK	1032	2	y11	23.9184	1258.65	1	y	11	3984.49	0	646.506	2178.19	2011.24	2362.4	244.009	0	3326.65	2222.4	3157.97	1446.88	797.527	405.825	0	0	4695.35	4027.96	1112.68	0	0	147.11	3174.36	1133.49	5556.24	7612.01	3060.77	2503.96	3045.06	2667.93	4975.62	5652.39	5460.42	4243.7	4624.42	5981.59
tr|F2EEV5|F2EEV5_HORVD	FAQSQQDFFEQFGVSIGK	1032	2	b9	23.9184	1099.48	1	b	9	3505.17	0	0	476.056	839.188	1007.89	194.87	1015.02	3140.7	354.018	639.824	557.588	0	843.498	0	585.82	401.371	1329.85	0	0	0	0	1635.13	0	3809.65	2825.28	1905.85	0	495.472	375.501	0	1873.65	0	1534.97	2517.34	2489.4
tr|F2EEV5|F2EEV5_HORVD	AEPPVAPGLSFDFYWQTC[CAM]PR	780.037	3	y6	25.3302	847.388	1	y	6	27889.3	26922.8	15466.6	19037.6	16794.2	31348.3	1313.45	2825.03	8744.46	38009	15188.8	21112	4785.45	6711.8	0	1005.24	3747.91	2654.2	0	635.86	0	978.601	2811.61	276.451	54791.2	60039.3	37184.2	24245.6	1288.81	11310.5	62573.6	59390.4	62867.2	61682.3	59713.4	72865.9
tr|F2EEV5|F2EEV5_HORVD	AEPPVAPGLSFDFYWQTC[CAM]PR	780.037	3	y7	25.3302	1010.45	1	y	7	10740.2	10369.2	11830.3	7043.3	6222.33	11457.4	4211.49	789.025	2469.31	11797.1	7599.71	7207.64	1878.02	4143.33	779.419	486.217	2039.67	496.161	3917.34	0	358.354	3036.34	1094.82	1260.53	24535.1	27431.5	16282.1	14144.4	2102.64	4717.66	29751.6	27945.3	29977.2	26244.4	24342.6	30307.9
tr|F2EEV5|F2EEV5_HORVD	AEPPVAPGLSFDFYWQTC[CAM]PR	780.037	3	y14	25.3302	887.406	2	y	14	691.358	2589.36	0	0	1881.09	0	3224.85	965.747	0	0	0	0	1982.04	3818.19	1028.51	1122.88	0	683.597	11054.4	986.435	837.646	0	0	665.547	6745.57	7767.74	2853.36	2186.27	0	786.542	6311.36	4574.53	12315.7	7322.54	5538.21	7628.88
tr|F2EEV5|F2EEV5_HORVD	AEPPVAPGLSFDFYWQTC[CAM]PR	780.037	3	y18	25.3302	1069.51	2	y	18	9511.26	5397.81	4966.02	3419.27	2136.77	4782.74	19942	4090.72	6164.02	7470.35	3730.62	0	4724.31	5738.55	910.009	10067.5	3543.74	1620.15	11269.3	0	0	13058.7	0	5285.74	8468.77	14713.8	6231.06	4234.6	2189.87	0	12394.2	13477.1	10503.7	11241.5	9658.99	13585.4
tr|F2EEV5|F2EEV5_HORVD	AEPPVAPGLSFDFYWQTC[CAM]PR	780.037	3	y8	25.3302	1157.52	1	y	8	7845.07	7071.66	4733.96	2652.94	4203.65	3895.54	7999.4	931.677	3745.02	8832.11	4714.52	6325.07	0	1304.83	0	322.305	1064.77	876.426	2483.06	1130.5	681.155	587.399	935.205	1122.62	13579.2	13657.1	6818.76	5616.31	411.242	2199.25	17371.2	14282.7	15301.8	16555	16612.5	18275.5
tr|F2EEV5|F2EEV5_HORVD	AEPPVAPGLSFDFYWQTC[CAM]PR	780.037	3	y9	25.3302	1272.55	1	y	9	3149.59	3579.76	5751.5	5619.04	3261.67	6161.06	0	0	2128.16	6995.59	2648.44	4644.74	1971.43	415.416	1648.65	327.552	0	0	0	3708.97	2807.77	0	0	400.569	8178.32	10577.8	5191.21	3682.14	759.523	1802.93	11370.6	11226.6	12433.2	10709.4	13604.6	15520.9
tr|F2EEV5|F2EEV5_HORVD	SAAEPPVAPGLSFDFYWQTC[CAM]PR	832.727	3	y7	25.1639	1010.45	1	y	7	956.446	7807.88	2007.95	133.232	1998.21	0	507.423	3113.4	691.107	12400.7	1881.65	0	705.153	734.628	3320.78	477.019	265.01	417.391	1465.37	361.928	2895.33	1649.77	927.599	0	23094.7	27930.9	16187.3	1008.04	1031.76	5761.24	13027.4	14819	14481.9	11757.2	11838.2	15028.6
tr|F2EEV5|F2EEV5_HORVD	SAAEPPVAPGLSFDFYWQTC[CAM]PR	832.727	3	y8	25.1639	1157.52	1	y	8	4541.29	3009.5	1962.39	1700.67	570.03	732.53	2142.67	465.165	499.035	2108.55	409.65	2157.98	1914.98	1099.96	755.968	0	1629.6	810.24	3640.02	0	3501.94	417.78	0	1127.1	12720.7	17180.2	7110.17	338.276	1904.06	2631.9	6175.85	10506.8	15726.3	8756.05	7212.2	8872.92
tr|F2EEV5|F2EEV5_HORVD	SAAEPPVAPGLSFDFYWQTC[CAM]PR	832.727	3	y9	25.1639	1272.55	1	y	9	3310.92	3234.36	1384.51	0	1014.76	1784.31	723.005	724.799	2245.61	4258.12	0	1518.25	1617.73	833.24	389.538	850.505	852.225	725.312	764.428	0	4275.39	188.888	0	1078.14	12959.8	18803.7	6566.55	232.84	859.526	2599.96	7660.22	8326.53	7542.58	6656.46	8083.42	9153.63
tr|F2EEV5|F2EEV5_HORVD	SAAEPPVAPGLSFDFYWQTC[CAM]PR	832.727	3	y11	25.1639	1506.65	1	y	11	0	1861.81	147.709	788.095	166.786	379.613	215.213	193.352	702.697	3095.55	120.747	299.144	77.8879	175.281	0	46.2582	0	138.694	0	280.001	651.632	171.762	339.786	522.865	4594.93	6023.19	3773.22	38.0222	0	1217.72	4998.91	3641.48	4807.4	4303.38	4844.82	5500.04
tr|F2EEV5|F2EEV5_HORVD	SAAEPPVAPGLSFDFYWQTC[CAM]PR	832.727	3	y14	25.1639	887.406	2	y	14	3280.38	20896.3	3236.97	7467.41	8388.36	1293.35	819.838	6807.22	8502.29	0	912.798	2741.9	661.393	2627.27	9993.33	0	1204.96	867.024	2787.87	1315.53	9186.31	2451.7	1062.9	2801.04	6991.83	7521.19	3321.35	239.305	11492.1	0	0	0	0	0	0	0
tr|F2EEV5|F2EEV5_HORVD	SAAEPPVAPGLSFDFYWQTC[CAM]PR	832.727	3	y18	25.1639	1069.51	2	y	18	3128.96	7731.83	656.108	1296.51	2938.27	1275.99	0	2587.96	5177.34	0	0	906.271	529.23	938.645	3561.26	970.247	238.655	0	496.235	427.648	4371.5	0	1217.37	398.292	4957.73	3191.21	1168.3	0	2868.81	1705.08	4271.02	0	3506.88	3530.71	3144.11	4761.09
tr|F2EEV5|F2EEV5_HORVD	AEPPVAPGLSFDFYWQTC[CAM]PR	1169.55	2	y14	25.3292	1773.81	1	y	14	8232.86	7099.73	2467.13	4396.05	4261.38	7376.84	2714.72	1139.63	2256.14	16604.2	125.133	209.985	760.48	235.469	0	866.223	0	623.74	0	1358.75	212.433	757.464	2223.91	357.3	20799.8	31004.1	13055.3	8029.14	6864.87	5841.75	21847.1	22096.6	29939.9	22454.5	22107.6	25104
tr|F2EEV5|F2EEV5_HORVD	AEPPVAPGLSFDFYWQTC[CAM]PR	1169.55	2	y11	25.3292	1506.65	1	y	11	3745.11	3179.37	5427.75	0	0	3155.58	1576.23	2080.39	1068.52	4645.98	0	2693.59	564.118	589.574	1012.75	128.212	1487.09	0	0	2657.71	174.093	486.264	1856.35	373.095	5404.08	6268.62	3164.37	2129.11	1481.43	1683.71	5229.31	7181.55	6025.23	6151.18	4933.87	7202
tr|F2EEV5|F2EEV5_HORVD	AEPPVAPGLSFDFYWQTC[CAM]PR	1169.55	2	y9	25.3292	1272.55	1	y	9	669.357	1491.14	5225.33	1072.71	1075.14	0	875.686	3422.81	252.861	0	0	0	573.506	642.006	15989.2	1379.45	235.462	953.068	10127.4	1701.9	0	718.591	2423.66	0	2032.07	4328.3	1923.89	764.712	837.716	1102.02	2160.44	2918.26	4278.03	0	5295.83	4053.67
tr|F2EEV5|F2EEV5_HORVD	AEPPVAPGLSFDFYWQTC[CAM]PR	1169.55	2	y10	25.3292	1419.61	1	y	10	1276.76	0	1793.81	0	1420.05	1405.03	417.715	901.618	621.054	0	0	642.984	1253.85	576.79	6897.66	868.489	803.189	710.678	5089.48	1480.67	387.093	538.79	0	839.9	3035.79	3052.77	0	1152.66	1026.94	375.815	2407.6	2484.42	0	1452.17	0	2790.55
tr|F2EEV5|F2EEV5_HORVD	AEPPVAPGLSFDFYWQTC[CAM]PR	1169.55	2	y13	25.3292	1676.75	1	y	13	1143.33	878.784	1594.98	503.376	0	1211.7	0	662.84	364.303	2425.17	84.5405	379.574	168.39	930.103	0	932.911	410.771	357.513	1196.06	867.186	662.141	441.155	946.28	155.351	2681.73	3164.1	2010.87	1011.8	624.481	628.295	2119.41	2168.7	3425.28	1392.14	2734.34	2080.05
tr|F2EEV5|F2EEV5_HORVD	AEPPVAPGLSFDFYWQTC[CAM]PR	1169.55	2	y18	25.3292	1069.51	2	y	18	13207.5	5233.42	0	3374.86	5144.35	4935.33	2897.6	803.242	1321.66	10771	589.765	403.364	11582.6	6156.35	918.047	6442.6	267.099	439.1	1017.13	1760.09	1934.63	5393.99	1070.04	1443.09	21663.3	26239	8720.11	6211.2	4668.2	3304.88	15910.6	18737.4	25272.1	17607.5	15678.1	22930
tr|Q40025|Q40025_HORVU	IVGNRLPGFSADESR	539.95	3	y13	11.5837	703.345	2	y	13	5962.5	5258.77	35398.4	25437.8	28627.2	45145	16678.1	15522.6	12641.9	72088.2	22741.2	49461.8	24999.3	8794.98	12194.4	22432.1	2119.05	9666.86	13390.1	11238.7	2960.57	18484.1	15389	9770.72	286531	343102	169840	151498	52952.2	41207.7	169685	225194	232310	181687	193425	258016
tr|Q40025|Q40025_HORVU	IVGNRLPGFSADESR	539.95	3	y14	11.5837	752.879	2	y	14	0	0	8485.67	7038.08	8937.7	12949.9	3851.04	4061.89	3098.52	18511.9	6006.74	13509.4	7839.06	2136.29	4020.06	5280.1	2416.21	2142.68	3718.1	2837.17	345.966	4488.9	3579.37	2378.75	82439.9	118067	50559.3	42546.9	19692.8	13516.1	47592.6	65745.5	68759.3	54515	59173.8	76938.5
tr|Q40025|Q40025_HORVU	IVGNRLPGFSADESR	539.95	3	y9	11.5837	965.432	1	y	9	9004.14	9236.36	6772.02	4578.29	6202.19	10448.1	2878.05	2419.16	2722.05	12879.6	4119.07	8872.08	3738.54	1667.11	1753.07	2927.74	3423.26	2098.11	2332.61	1907.57	1205.06	3055.9	1943.44	2835.23	52341.6	71680.8	32543.5	31401.8	14911.2	11875.8	34336.5	45103.7	49271.6	34659.8	41745.2	54952.8
tr|Q40025|Q40025_HORVU	IVGNRLPGFSADESR	539.95	3	y6	11.5837	664.29	1	y	6	28331	21172.5	6277.72	3658.21	4950.98	9083.64	4991.72	3774.04	4267.49	13710.7	5105.56	9629.65	5228.46	0	5335.43	3901.61	10544.6	2704.78	5121.11	3109.35	3592.47	5539.23	4491.13	3673.48	46745.2	68705.2	35680.6	30433.7	17398.1	15203.8	27172.5	41607.8	43285.6	30382.3	34003	43354.4
tr|Q40025|Q40025_HORVU	IVGNRLPGFSADESR	539.95	3	y5	11.5837	577.258	1	y	5	8684.96	5153.08	10027.8	6100.12	5306.88	8770.57	4837.81	0	4592.38	11372.5	0	6676.17	8028.22	7080.11	3521.83	6159.83	2376.97	0	5392.49	2507.8	1423.46	5979.95	0	0	28760	41473.4	22588.9	22888.1	14638.9	11945.2	19018.2	25136.7	30342.4	19823.8	20828.5	33793.2
tr|Q40025|Q40025_HORVU	IVGNRLPGFSADESR	539.95	3	y8	11.5837	868.38	1	y	8	43030.5	41788.1	4960.5	2135.42	2785.02	4380.29	1172.87	2159.7	2993.86	4593.83	0	5429.09	1478.15	0	0	1513.42	12252.7	791.219	1974.38	0	6874.81	0	2166.27	467.693	21950.4	28501.6	13400	17425.8	7206.5	7500.65	13447.8	19452.9	20012.6	14681.4	15509.5	18883.6
tr|Q40025|Q40025_HORVU	VVAALGYDNGFHAPGR	548.615	3	y11	13.0776	595.771	2	y	11	11304.9	10203.2	5274.84	5635.1	4505.64	11875.1	4517.68	2965.35	512.508	17068.3	861.408	10807.1	0	866.455	114.576	323.646	2591.3	1463.73	1038.64	0	1586.2	227.74	1382.65	85.2995	79656.2	118862	47177.4	36011.2	17512	15608.3	37885.6	47008.2	57711.9	43970.8	46145.2	65230.7
tr|Q40025|Q40025_HORVU	VVAALGYDNGFHAPGR	548.615	3	y14	13.0776	723.35	2	y	14	22917	14546.6	9304.46	7445.58	8813.93	19527.5	7886.46	5749.44	1015.66	30634	1994.02	15741.9	447.083	1582.54	559.113	1377.92	4554.16	580.395	1039.09	755.397	2480.32	808.893	1329.18	563.355	102983	149662	61093.1	45053	24271	27462.9	54106	64969.2	75549.3	56189.5	59213.9	80803
tr|Q40025|Q40025_HORVU	VVAALGYDNGFHAPGR	548.615	3	y11	13.0776	1190.53	1	y	11	3218.48	2651.16	1154.1	1402.99	1759.83	2980.29	1093.57	560.563	0	4018.78	43.7134	2381.31	0	131.519	47.7682	388.667	140.91	43.492	0	141.2	0	235.716	59.8422	0	25586.3	36479.9	11573.8	11267.9	6440.12	5624.14	11574.3	15558.8	16928.2	9840.52	15242.7	20578.4
tr|Q40025|Q40025_HORVU	VVAALGYDNGFHAPGR	548.615	3	y8	13.0776	855.422	1	y	8	4840.23	3338.38	2735.04	2396.45	2525.45	4574.94	1635.12	1517.42	819.831	6636.59	3680.9	4022.51	358.925	513.379	688.453	2024.59	0	0	666.706	501.206	2145.92	638.424	0	1022.7	25659.2	39020.6	14949.9	13955.4	7306.59	7032.08	14023.1	15806.4	19336.3	14557.7	14422.3	24701.6
tr|Q40025|Q40025_HORVU	VVAALGYDNGFHAPGR	548.615	3	y9	13.0776	970.449	1	y	9	3836.13	2633	445.096	1634.91	2214.06	4431.94	1447.7	889.344	1349.87	5802.63	1879.86	3389.43	1609.82	169.734	1424.04	0	2630.68	864.622	115.556	0	3918.57	323.617	127.019	206.632	26053.8	38485.1	14408.4	12968.1	6410.65	7540.13	11888.4	17143.5	18675	13694.6	14758.9	20445.5
tr|Q40025|Q40025_HORVU	VVAALGYDNGFHAPGR	548.615	3	y7	13.0776	741.379	1	y	7	0	0	0	0	0	0	1719.53	0	2351.64	5509.41	2166.64	2871.75	1259.79	6409.32	426.867	906.093	3401.18	1295.15	2544.9	1011.41	2013.36	2297.36	0	1092.87	29596.6	31204.6	18959.3	13785.7	8813.2	0	16929.6	21048	18640.6	13465	15658.8	22318.2
tr|Q40025|Q40025_HORVU	DGPNPNPEIGNTGGLSR	847.908	2	y11	10.2446	1100.57	1	y	11	72880.3	50366.6	72689.5	36871.1	33106.3	60744.4	12609.7	6710.97	28138.8	79969.1	45199.1	45001.8	7978.65	24517.1	33141.7	68494.8	55033.2	19064.9	69247.3	25880.4	15725.8	38050.7	10356.4	4417.18	85424.8	109625	55151.7	32407.5	6048.49	8870.83	62548.5	54677.1	115162	35802.4	46494.1	74812
tr|Q40025|Q40025_HORVU	DGPNPNPEIGNTGGLSR	847.908	2	y13	10.2446	1311.67	1	y	13	35518.4	26489.2	32409.8	20267.4	16876.8	27692.3	5331.49	3698.3	12826.9	38614.5	20618.3	19593.3	624.65	12667.9	16127.2	36369.1	31425.4	8439.37	35856.4	12967.3	6030.61	21630.9	5743.22	2876.92	40332.2	50953.5	27877.5	17841.4	3704.16	6973.53	31735.3	24945.4	52444.2	18332.4	21794.2	36121.9
tr|Q40025|Q40025_HORVU	DGPNPNPEIGNTGGLSR	847.908	2	y9	10.2446	874.474	1	y	9	14931.2	13113.5	16347.2	7985.88	6771.78	13464.1	1451.23	1854.54	7367.43	17734.5	11218.8	10708.2	7109.58	8602.4	9618.95	15736.5	16324.7	6013.25	17595.5	8372.55	4807.12	13615.4	2642.77	1712.56	22407.2	27242	16916.5	10427.2	2998.34	5236.91	15661	13900.5	26747.1	7808.34	11283.4	18550.9
tr|Q40025|Q40025_HORVU	DGPNPNPEIGNTGGLSR	847.908	2	b9	10.2446	934.427	1	b	9	8575.53	6235.5	10481.1	5334.26	4607.45	0	1613.38	1481.63	5462.71	7911.1	3882.52	0	3034.02	0	4813.28	0	0	0	9075.04	1443.3	2321.38	4357.56	1635.65	858.181	0	0	4302.73	3500.03	0	0	0	0	0	0	0	5266.16
tr|Q40025|Q40025_HORVU	DGPNPNPEIGNTGGLSR	847.908	2	y10	10.2446	1003.52	1	y	10	6573.19	5752.43	7495.84	4057.28	3043.46	6010.71	967.66	275.591	2532.9	10681.3	5718.81	5299.22	6227.86	4364.45	5899.88	6324.39	5765.09	0	10314.6	3721.38	1400.14	4542.07	0	0	8225.63	11156.2	6489.49	4836.59	1662.26	2474.81	4877.27	4532.01	8851.94	3207.1	3521.94	6211.65
tr|Q40025|Q40025_HORVU	DGPNPNPEIGNTGGLSR	847.908	2	y12	10.2446	1214.61	1	y	12	7825.79	7922.46	7674.75	5115.81	4923.73	7159.17	1386.18	876.667	5548.72	10917.6	6024.61	4900.06	732.394	3030.96	7220.44	9294.31	7532.04	3973.1	9891.57	4010.4	2581.46	6693.34	1094.97	294.271	10017.8	14372.9	7934.14	5505.02	1247.97	2331.23	7339.41	6298.57	11195.7	4256.57	4459	9098.68
tr|Q40025|Q40025_HORVU	IVGNRLPGFSADESR	809.421	2	y9	11.5944	965.432	1	y	9	2343.41	2277.32	1212.57	0	0	0	326.845	0	1332.91	0	1124.84	2052.37	388.421	515.465	0	3017.8	5136.09	1631.01	3541.59	3978.44	869.024	2724.16	777.082	0	6933.39	12615	4992.04	4708.55	0	269.46	5213.74	6405.65	7295.44	3862.05	5553.05	7034.13
tr|Q40025|Q40025_HORVU	IVGNRLPGFSADESR	809.421	2	b12	11.5944	1227.65	1	b	12	363.344	854.731	552.286	0	1288.67	0	890.802	0	584.179	215.454	611.339	1391.97	1181.97	172.214	526.553	0	1836.91	139.077	486.262	362.199	127.113	704.933	289.904	119.197	6261.34	10430.6	3218.71	3664.8	1951.03	1872.51	3354.69	5639.25	5748.14	3611.31	4220.61	7041.05
tr|Q40025|Q40025_HORVU	IVGNRLPGFSADESR	809.421	2	b13	11.5944	1356.69	1	b	13	749.335	1192.44	264.747	0	199.328	243.328	0	255.399	520.324	0	722.424	978.584	560.347	304.988	296.156	0	373.984	123.768	0	541.906	0	435.621	652.623	149.644	2806.48	4135.13	1344.08	1023.63	629.965	532.371	2104.32	2210.91	2755.95	1729.19	2319.14	3529.01
tr|Q40025|Q40025_HORVU	IVGNRLPGFSADESR	809.421	2	y10	11.5944	1078.52	1	y	10	992.494	1023.51	4223.19	769.249	237.057	350.927	0	0	0	5386.14	1143.14	543.044	0	0	1592.24	2077.79	289.78	3849.42	166.165	632.512	670.914	1986.34	1173.11	771.142	2627.36	5949.62	2410.94	2418.8	0	692.553	1019.67	2279.57	2559.26	1063.02	1712.99	2494.49
tr|Q40025|Q40025_HORVU	IVGNRLPGFSADESR	809.421	2	b14	11.5944	1443.72	1	b	14	103.556	235.648	0	141.535	571.485	3941.73	385.832	185.325	744.042	235.504	0	1530.8	1314.68	0	400.479	0	0	751.846	634.231	388.302	0	179.143	78.2184	76.0073	1108.76	2255.58	1122.08	361.152	121.729	291.635	318.466	1359.04	843.219	893.771	413.957	2075.49
tr|Q40025|Q40025_HORVU	IVGNRLPGFSADESR	809.421	2	b10	11.5944	1041.58	1	b	10	0	305.148	0	5799.87	538.278	0	359.985	3112.94	0	0	0	0	0	6161.38	226.826	504.738	143.631	473.471	393.264	658.554	107.586	106.912	417.667	123.731	0	650.556	470.522	365.137	0	1179.5	0	0	432.622	625.226	1432.97	910.529
tr|Q40025|Q40025_HORVU	VVAALGYDNGFHAPGR	822.418	2	y12	13.0969	1303.62	1	y	12	3460.01	257.751	993.676	2472.05	704.559	0	113.924	2352.79	3036.99	1146.73	3372.93	341.11	2020.38	1874.13	797.419	0	523.592	703.449	523.186	233.888	1424.94	1269.11	679.869	344.904	2750.51	4249.42	1979.04	1147.92	566.503	0	2083.95	2864.72	1692.89	1671.95	2374.03	3384.1
tr|Q40025|Q40025_HORVU	VVAALGYDNGFHAPGR	822.418	2	y11	13.0969	1190.53	1	y	11	0	0	1611.6	1646.24	331.107	823.066	0	1068.46	1178.73	8513.05	2331.8	5627.26	4673.64	3130.8	6469.38	2674.47	0	360.639	5040.6	201.379	2233.66	5193.7	318.846	1736.38	12103.4	17768.5	6686.77	4683.89	2643.12	3441.47	8477.32	12745.4	11297.1	6772.82	11452.5	12798.5
tr|Q40025|Q40025_HORVU	VVAALGYDNGFHAPGR	822.418	2	y8	13.0969	855.422	1	y	8	3619.82	465.669	1803.35	895.02	2808.86	0	343.425	667.141	1065.19	905.177	1444.33	1676.12	1902.29	3223.2	1788.64	1179.23	2921.07	0	5240.92	1245.16	0	1414.37	969.965	0	3599.24	4785.47	1328.22	1989.79	8955.96	18193.5	3316	3622.87	2253.01	3106.27	2840.56	4257.73
tr|Q40025|Q40025_HORVU	VVAALGYDNGFHAPGR	822.418	2	y9	13.0969	970.449	1	y	9	3833.37	2106.95	3367.58	5025.44	0	0	143.969	2686.41	2542	1871.89	4357.23	2461.04	33533.7	29361.7	0	606.623	5248.11	1161.03	839.472	0	19687.5	1100.94	4718.69	241.105	4257.5	6648.71	3226.76	2692.55	9133.76	10073.9	3765.17	4960.42	3237.02	2354.28	3992.91	7287.45
tr|Q40025|Q40025_HORVU	VVAALGYDNGFHAPGR	822.418	2	y10	13.0969	1133.51	1	y	10	1372.36	1122.94	858.684	3342.64	942.695	423.37	240.606	795.471	1927.59	547.674	1465.81	541.599	5254.28	3098.09	0	0	1637.52	220.545	0	962.005	1494.39	492.968	1331.63	111.062	2230.4	3782.48	925.424	1149.25	1766.53	2739.58	1152.13	2388.49	1855.73	2494.59	1381.65	3007.48
tr|Q40025|Q40025_HORVU	VVAALGYDNGFHAPGR	822.418	2	y13	13.0969	1374.65	1	y	13	4998.06	203.645	1081.28	1782.77	61.5558	303.569	0	2863.18	3090.51	576.915	4471.45	568.36	1403.36	0	742.512	245.821	635.211	214.438	0	414.598	0	290.85	586.605	0	3470.13	1814.63	2454.31	1345.74	0	0	1136.52	2840.08	0	1758.71	2857.19	4246.09
tr|M0XRX1|M0XRX1_HORVD	ISQLGDESPAVAR	671.852	2	y9	9.37386	901.437	1	y	9	40669.9	31359.4	22437.1	17612.1	20893.4	50195.5	22162.7	14445.9	16118.2	100912	30978.4	60063.5	13908.3	2593.95	3092.75	9527.13	13539.4	3207.65	4284.4	5948.23	4411.99	9147.99	12590.8	11659.9	140560	222881	126738	4536.24	10916.2	36700	129152	172937	232419	109706	144088	168354
tr|M0XRX1|M0XRX1_HORVD	ISQLGDESPAVAR	671.852	2	y7	9.37386	729.389	1	y	7	10314.6	9367.86	6228.16	6761.62	6763.54	19207	9719.04	4065.48	7286.65	33612.7	10831.3	21286.7	12763.3	26015.7	3038.31	4692.9	13562.9	1526.62	0	1872.89	2870.49	4121.24	3807.96	3387.14	39626.9	65549.4	42044.4	614.909	3655.46	21914.6	41915.3	50037.8	75404.5	33443.5	45016.6	50775.1
tr|M0XRX1|M0XRX1_HORVD	ISQLGDESPAVAR	671.852	2	y10	9.37386	1014.52	1	y	10	15975.7	15257.7	11735	10615.1	8205.79	24715.6	12068.5	8255.46	5691.12	47702.7	15133.2	25531.3	2334.68	13847.7	3780.47	4551.87	0	1555.74	1309.14	4186.26	2953.9	6704.62	5968.42	4326.63	58034.9	93482.9	54315	2514.19	4498.81	16924	58686.9	70970.6	105572	51431.9	70388.8	76792.5
tr|M0XRX1|M0XRX1_HORVD	ISQLGDESPAVAR	671.852	2	y8	9.37386	844.416	1	y	8	7735.59	6282.88	4671.76	4053.03	3848.12	11023.6	4390.47	2008.27	4119.4	25073.6	9688.22	12429.8	27650.1	2969.42	2792.21	5324.34	16763.9	0	0	1744.61	2250.83	5313.1	0	2494.96	24989.1	40870.6	23729.4	0	2762.36	9228.67	22407.6	32854.6	45854.1	20907.6	31694.8	33759.8
tr|M0XRX1|M0XRX1_HORVD	ISQLGDESPAVAR	671.852	2	y12	9.37386	1229.61	1	y	12	0	0	2385.19	2591.1	1254.27	2830.14	1629.43	1077.69	1375.45	5308.64	2129.08	2843.84	0	1530.41	1409.2	2785.59	0	1299.16	519.437	0	1204.82	1575.5	1574.04	1177.51	6639.83	10987	6751.45	0	621.743	5006.06	6856.9	8504.45	0	7905.05	0	8985.79
tr|M0XRX1|M0XRX1_HORVD	ISQLGDESPAVAR	671.852	2	b7	9.37386	743.357	1	b	7	3698.29	0	0	0	0	0	0	673.987	0	7646.44	0	0	12144.1	0	999.377	4484.59	15853.5	0	0	0	1558.56	4317.3	1243.63	0	0	0	0	0	654.231	0	0	0	0	0	0	0
tr|M0VFV9|M0VFV9_HORVD	C[CAM]AVGDQQVPDVLK	714.861	2	y10	13.5748	1098.58	1	y	10	532332	383329	514694	416681	341449	388042	334319	192341	280374	472488	289978	323934	530137	503993	583673	553416	644122	364607	550747	493204	445455	592649	437551	377230	212927	314332	208649	112661	27788.4	33702.5	300156	487147	575079	375421	436309	488120
tr|M0VFV9|M0VFV9_HORVD	C[CAM]AVGDQQVPDVLK	714.861	2	b8	13.5748	858.377	1	b	8	204868	142823	211180	160837	135031	148331	115498	70891	108955	202232	112275	125556	204234	210044	234643	223887	254573	136754	221327	191566	177923	229444	161275	140147	83500	126111	95086	53085.7	13530.8	29902.5	113546	191907	214896	140797	176426	194335
tr|M0VFV9|M0VFV9_HORVD	C[CAM]AVGDQQVPDVLK	714.861	2	y11	13.5748	1197.65	1	y	11	247755	171823	239582	196393	159515	194565	150113	82382.8	130480	224685	128680	141769	256369	249090	271410	266850	321432	164087	272000	232243	230069	279435	207137	162842	89566.9	138586	92780.8	48910.8	12780.4	17784.2	135713	244476	271733	171907	216849	263355
tr|M0VFV9|M0VFV9_HORVD	C[CAM]AVGDQQVPDVLK	714.861	2	y7	13.5748	798.472	1	y	7	116632	73153	109752	90239.2	71764.6	82380.3	65873.7	35387.9	52448	103726	54982.3	63495.9	112997	117976	131698	122221	149568	69914.7	121254	100557	97096.8	126746	87418.9	67315.9	40391	65913.5	54867.5	38074.3	8434.87	18637.2	59123.7	104531	127482	74662.1	96298	110165
tr|M0VFV9|M0VFV9_HORVD	C[CAM]AVGDQQVPDVLK	714.861	2	y9	13.5748	1041.56	1	y	9	113595	71992.8	110416	84811.9	64828.3	79046.5	59734.5	35580.8	55208.7	106415	55716.9	60086	109715	110432	120710	117757	140584	68970.9	114956	103364	96908.1	125657	85406.2	73946.8	39525.9	62895.2	46622.2	31706.8	8593.53	18218.1	58427.5	106900	118400	74408.8	94740.5	108684
tr|M0VFV9|M0VFV9_HORVD	C[CAM]AVGDQQVPDVLK	714.861	2	y8	13.5748	926.531	1	y	8	124411	76728.3	118376	89392.4	77896.2	87680.8	65255.7	37728.6	60775.5	107382	61988.9	66347.6	118517	125734	130895	129332	155073	75218.6	127948	105591	101227	131710	95807	77143.8	40537.5	68446.2	49773.2	31267.3	7254.94	17647.7	59994.4	113119	135439	80009.6	103201	112954
tr|M0VFV9|M0VFV9_HORVD	RC[CAM]AVGDQQVPDVLK	528.944	3	b6	11.4731	659.293	1	b	6	422697	273925	445299	366641	276600	280825	253616	129928	194609	380658	213622	237180	437836	437476	476154	441819	565480	279251	347451	399664	416652	501398	354627	291500	164149	278739	184949	147426	35352.1	70211.1	236018	421083	488130	297840	413647	439706
tr|M0VFV9|M0VFV9_HORVD	RC[CAM]AVGDQQVPDVLK	528.944	3	y5	11.4731	571.345	1	y	5	822004	565908	855692	713567	563970	607024	487850	283736	388242	728744	431989	463013	817885	837087	857196	810490	991066	560034	675626	767633	777093	906708	673163	595907	337703	561459	378395	317988	70892.8	117084	483837	767336	790948	593640	753352	808744
tr|M0VFV9|M0VFV9_HORVD	RC[CAM]AVGDQQVPDVLK	528.944	3	b7	11.4731	787.352	1	b	7	147415	97332.5	157610	127540	98972	106777	91378.2	46554	68884.4	130776	75929.4	88955.7	159203	157417	164835	158706	203152	102132	120329	144931	152494	184689	125228	105680	55412.7	95314.3	56815.6	46623.4	9820.07	21388.8	85930.6	150096	169225	110878	146118	159459
tr|M0VFV9|M0VFV9_HORVD	RC[CAM]AVGDQQVPDVLK	528.944	3	b8	11.4731	915.41	1	b	8	170186	122142	188404	150613	114871	118028	104931	57460.8	86506	156635	88411	102670	182477	184224	195757	181963	236393	115474	145706	172997	177519	220017	151315	124176	67942.7	105940	62602.6	53455.6	11993.5	22759	98634.4	175782	192277	130753	177861	182168
tr|M0VFV9|M0VFV9_HORVD	RC[CAM]AVGDQQVPDVLK	528.944	3	y6	11.4731	670.413	1	y	6	462771	338368	456395	382937	288636	341534	306820	0	264283	461850	274692	297906	419751	424448	473440	403159	531577	282606	350973	385572	394150	454850	343894	266048	95959.4	325151	0	177455	19040.5	32613.2	299367	415303	475520	330657	395091	439171
tr|M0VFV9|M0VFV9_HORVD	RC[CAM]AVGDQQVPDVLK	528.944	3	y7	11.4731	798.472	1	y	7	155520	103756	168547	133686	106996	115257	91890.1	51269.9	75491	152718	82199.6	88685	164896	161958	175291	158441	199851	109517	129577	151185	159949	188739	135267	112166	60820.1	98556.4	59432.3	50975.8	11741.5	24457.3	93050.5	145572	158488	107917	153577	158342
tr|M0VFV9|M0VFV9_HORVD	C[CAM]DALSILVNGVITEDGSR	640.323	3	y7	26.0263	777.374	1	y	7	469430	357952	468731	387615	309154	241373	292740	167043	238789	352554	220225	233829	469206	461567	477387	426866	374264	310247	376665	385732	457511	568412	409935	338626	227253	354085	157589	140431	37495.9	11583	332103	488666	414235	419567	480164	547042
tr|M0VFV9|M0VFV9_HORVD	C[CAM]DALSILVNGVITEDGSR	640.323	3	y6	26.0263	664.29	1	y	6	323029	257657	341982	286904	224141	179277	204763	122801	169582	253060	156508	164086	349875	341517	349306	307984	242713	220526	279433	285691	341411	420331	301922	255678	162929	267882	118251	123294	34276.8	9067.34	232189	346265	300551	311206	344115	395261
tr|M0VFV9|M0VFV9_HORVD	C[CAM]DALSILVNGVITEDGSR	640.323	3	y10	26.0263	1047.51	1	y	10	117232	102982	136309	95817.5	73201.1	62190.3	70176.9	43853.4	52337.4	94260.2	50295.9	54459.9	118196	104382	120360	107721	0	70743.5	0	98839.8	109544	145381	104369	87156.1	55132.5	86402.6	37633	27365.9	0	0	81694.9	136207	101774	101238	128703	142682
tr|M0VFV9|M0VFV9_HORVD	C[CAM]DALSILVNGVITEDGSR	640.323	3	b6	26.0263	660.302	1	b	6	67968.7	54125.7	73296.4	55118.5	45539	27796.5	43366.5	24359.7	30460.4	53984.5	27546.4	35923.6	64266.5	66840.9	73112	66443.6	64808.3	43030.6	63089.8	47900.5	69777.5	88038.1	55425.9	48687.2	33096.3	49874.5	29190.1	22343.8	7257.19	2431.48	47224.5	69451.4	58239	59812.2	77668	78947.6
tr|M0VFV9|M0VFV9_HORVD	C[CAM]DALSILVNGVITEDGSR	640.323	3	y8	26.0263	876.442	1	y	8	50736.1	37299.2	49776.8	34904	28475.2	21233	30555.7	13611.3	27048.2	34660.2	18501.3	23008.9	44894.6	48201.1	47562	44748.2	37395	29296.8	24367	37019.7	43541.6	56066.8	39394.9	36461	25011.6	37647.2	13328.7	15857.9	4138.96	1945.61	35554.3	52207.5	43413	41170.6	54059.9	54366.8
tr|M0VFV9|M0VFV9_HORVD	C[CAM]DALSILVNGVITEDGSR	640.323	3	y9	26.0263	933.464	1	y	9	91599.5	80971.5	101754	85406.1	62822.5	57621.7	65420.7	31173.8	54785.4	76868.8	42432.1	47868.6	106245	96605	102955	90838.8	69784.3	68892.5	79419.7	80366.6	99107.4	127905	96220.8	79270.8	43548.3	74410.4	36140	36785.6	12167.1	1389.9	67774.3	109332	85633.9	95308.2	102856	122227
tr|M0VFV9|M0VFV9_HORVD	ELSDLPESC[CAM]RC[CAM]DALSILVNGVITEDGSR	1035.83	3	y11	26.0347	1146.57	1	y	11	43766.6	16759.3	47158.7	32513.7	28024.6	19998.1	16226.4	11892.4	17943.5	3737.31	19781.8	18955.7	90480.5	35659.4	57792.2	66944.9	68336.2	5213.88	41198.3	52590.2	61824.7	83851	57223.9	40450.4	49685.2	60187.5	19706.8	25393.8	12915.3	16645.2	53106	140179	72964.7	76748.3	106696	84819.4
tr|M0VFV9|M0VFV9_HORVD	ELSDLPESC[CAM]RC[CAM]DALSILVNGVITEDGSR	1035.83	3	y12	26.0347	1259.66	1	y	12	23462.8	9968.26	32668.3	20942.1	18041.7	9925	11381.5	8055.69	12835.8	0	8287.7	9582.37	65441.3	20979.1	35101.9	38458.7	38992.9	3430.53	24986.5	30409.4	38004.6	51215.4	32958.3	24493.9	25839.7	30936.5	15578.8	16221.8	9496.42	8193	31739.5	86096.3	39009.6	48563.7	60241	53361
tr|M0VFV9|M0VFV9_HORVD	ELSDLPESC[CAM]RC[CAM]DALSILVNGVITEDGSR	1035.83	3	b21	26.0347	1165.06	2	b	21	0	0	0	0	0	708.661	0	0	0	132.543	0	0	0	0	0	0	0	118.766	0	0	0	0	0	0	0	0	0	0	0	0	0	0	0	0	0	0
tr|M0VFV9|M0VFV9_HORVD	ELSDLPESC[CAM]RC[CAM]DALSILVNGVITEDGSR	1035.83	3	y23	26.0347	1274.61	2	y	23	12615.4	5328.12	10687.7	9111	7129.87	4138.51	4266.66	3547.91	4414.71	0	4817.78	3675.09	26640.4	8918.49	14104.2	18251.2	21000.7	3620.48	13643.7	14727.5	17436.1	22575.3	15715.1	12980.9	10684.7	18904.2	5954.43	7350.56	5016.24	6894.51	15981.9	37804.9	18594	20850.5	29310.6	27748.6
tr|M0VFV9|M0VFV9_HORVD	ELSDLPESC[CAM]RC[CAM]DALSILVNGVITEDGSR	1035.83	3	b22	26.0347	1221.6	2	b	22	0	0	0	0	0	0	0	0	0	0	673.111	0	0	0	0	0	0	1019.15	0	0	0	0	0	0	0	0	0	0	2265.11	2701.02	0	0	0	0	0	0
tr|M0VFV9|M0VFV9_HORVD	ELSDLPESC[CAM]RC[CAM]DALSILVNGVITEDGSR	1035.83	3	y26	26.0347	1432.18	2	y	26	0	0	2230.4	0	1699.44	0	0	802.841	1363.19	167.433	0	0	0	0	0	0	0	337.994	0	2488.29	0	0	0	2180.8	0	0	0	0	995.108	0	0	0	0	0	0	0
tr|M0VFV9|M0VFV9_HORVD	PINPLPAC[CAM]R	519.282	2	y6	14.4877	713.376	1	y	6	19055.6	14285.8	19697.7	15281.9	15527.6	15284	13196.4	8329.47	8385.42	15860.9	10726.2	12345.9	26308.8	28899.2	28818.3	32748.1	36086.1	20131.4	29197.3	27822.1	27378.6	31310.3	26640.7	22564.5	7194.95	12207.1	10503.6	8071.87	3545.89	4532.56	13816.3	20722.7	21253.1	18227.6	18538.2	25380.4
tr|M0VFV9|M0VFV9_HORVD	PINPLPAC[CAM]R	519.282	2	y7	14.4877	827.419	1	y	7	15599.7	11544	17299.6	16343.8	12578	14198.3	12299.7	7809.38	7832.68	14198.6	10370	13960.3	21123.6	23072.1	22112.3	27367.7	32929.9	14867.6	24545.4	27623.3	22193.9	27742.9	23496	19550	7205.19	12307.4	8668.19	6304.95	2289.04	4051.63	12599	21544.8	21510.2	15236.6	17177.9	22100.2
tr|M0VFV9|M0VFV9_HORVD	PINPLPAC[CAM]R	519.282	2	y5	14.4877	616.324	1	y	5	0	2036.92	0	1515.73	739.404	0	1391.52	755.437	0	0	0	0	0	1181.67	1941.99	2175.77	2284.6	1997.9	0	2067.35	1584.12	2152.19	1898.83	1781.82	0	0	0	0	0	437	0	0	1988.66	3026.53	2656.21	0
tr|M0VFV9|M0VFV9_HORVD	PINPLPAC[CAM]R	519.282	2	y8	14.4877	940.503	1	y	8	2545	1303.65	2110.28	1406.93	2221.07	1686.6	1328.72	1140.35	0	1972.25	1775.78	1272.53	2239.56	2587.67	3153.23	2023.49	3419.89	1951.99	3596.62	2654.15	2739.8	3984.08	1959.99	2062.62	1610.52	1463.1	1420.3	1915.94	1035.7	865.74	1838.24	2214.45	2530.01	3251.21	3015.97	3691.67
tr|M0VFV9|M0VFV9_HORVD	PINPLPAC[CAM]R	519.282	2	b3	14.4877	325.187	1	b	3	14648	15156.4	15151.7	14596.1	11307.3	12473	13138.8	7789.98	8442.68	14914.1	9608.65	11076	15989	17224.7	17249.2	16659.7	23578.5	15405.4	16947	19382.6	18991.2	19635.7	17364.1	14218.1	7123.01	13159.8	9542.29	8500.05	5051.48	5272.07	11010.6	15973.3	17383.2	12503.6	16761.1	17278.2
tr|M0VFV9|M0VFV9_HORVD	PINPLPAC[CAM]R	519.282	2	y6	14.4877	357.192	2	y	6	2076.22	2164.43	2007.11	1204.02	2069.84	2255.05	1305.56	1506.33	0	3888.82	1532.92	1593.22	0	0	1347.38	0	0	0	0	1160.85	0	0	0	0	3128.27	3422.19	2994.37	1820.16	1445.21	3792.98	1160.54	1357.93	0	992.395	1482.1	1840.27
tr|M0VFV9|M0VFV9_HORVD	PGTPGGDC[CAM]VLFGGGIS	745.851	2	b9	16.5514	841.351	1	b	9	9469.66	6408.3	12417.1	9530.6	5760.68	7779.23	5126.78	807.493	3764.47	0	5805.86	4258.46	0	8659.4	917.388	7939.63	4156.39	5327.59	0	7185.85	9676.98	14201.1	10904.4	4371.18	2122.24	10745.5	7195.57	4994.85	431.444	407.863	7656.44	7091.43	14759.5	5035.66	0	9318.71
tr|M0VFV9|M0VFV9_HORVD	PGTPGGDC[CAM]VLFGGGIS	745.851	2	b10	16.5514	954.435	1	b	10	5856.93	2440.64	8474.81	5566.49	5130.04	5906.24	3074.83	1471.98	3889.34	9059.09	5265.21	3922.28	5030.06	8036.72	4734.46	12034	1475.75	6450.21	3288.5	9795.32	8148.67	13228.8	10528.1	6032.93	1735.48	4502.36	2686.32	3960.13	461.394	453.431	1839.19	7148.31	6817.4	4457.03	3466.58	6097.9
tr|M0VFV9|M0VFV9_HORVD	PGTPGGDC[CAM]VLFGGGIS	745.851	2	b14	16.5514	1272.57	1	b	14	11956.3	2196.64	19662.4	0	12606	10930.7	0	0	9305.01	11150.1	0	12194.2	19215	20147.7	1296.57	19424.5	778.747	14649.5	0	13045.8	15824.1	20669.6	14473	11469.7	7401.53	7547.36	3972.17	2760.91	0	89.7513	0	13268.9	13152.9	10083.9	461.849	11119.3
tr|M0VFV9|M0VFV9_HORVD	PGTPGGDC[CAM]VLFGGGIS	745.851	2	b13	16.5514	1215.55	1	b	13	0	2701.47	0	0	7562.94	0	489.284	611.529	5682.71	0	8392.16	0	0	4525.48	0	0	803.599	0	0	0	3810.61	0	0	0	0	3332.73	0	763.036	530.42	411.704	0	0	0	11140.5	0	0
tr|M0VFV9|M0VFV9_HORVD	PGTPGGDC[CAM]VLFGGGIS	745.851	2	b11	16.5514	1101.5	1	b	11	15320.5	0	15963.1	7907.5	0	21149.8	1997.77	1190.52	0	11508.6	1844.26	0	1020.72	3454.43	6472.97	4234.7	0	4844.6	2480.23	3368.68	4578.11	5180.25	4315.75	2838.73	0	0	0	783.415	0	1062.32	2219.52	0	4274.07	2272.07	873.626	9814
tr|M0VFV9|M0VFV9_HORVD	PGTPGGDC[CAM]VLFGGGIS	745.851	2	y13	16.5514	1235.57	1	y	13	2652.85	367.943	1422.37	1626.55	441.219	5209.28	1284.07	3083.72	0	0	0	1387.69	453.487	0	0	3313.99	0	1335.92	670.766	1359.83	5282.96	0	0	3152.59	1199.94	994.534	1077.77	1024.87	296.359	365.751	678.961	0	2337.87	1322.18	1751.65	2756.87
tr|M0Z714|M0Z714_HORVD	LSTEPDFLENRIPTK	587.312	3	y11	15.487	665.362	2	y	11	540943	88762.1	62530.4	58593.4	41523.2	89194	346134	26256.5	341076	593982	25523.9	48370.3	295062	293717	49322.4	322780	394122	191774	255110	167890	174967	275306	181634	134068	313635	131162	196771	135763	36929.5	46056.6	307745	290251	81275.5	41636.1	307997	58037.9
tr|M0Z714|M0Z714_HORVD	LSTEPDFLENRIPTK	587.312	3	y7	15.487	857.484	1	y	7	199768	36731.5	23867.2	24277.9	17921	34737.7	104210	10460.3	108036	215005	11565.3	19570	76952.2	91673.8	19318.2	94223.8	123853	54352.6	60016.4	47482.3	50997.4	77586.9	51046.5	39557.4	94133.6	37909	52892.5	43746.3	16024	19117.8	92907.5	81315.8	26408.1	16337.8	88919.4	19711.6
tr|M0Z714|M0Z714_HORVD	LSTEPDFLENRIPTK	587.312	3	y13	15.487	780.407	2	y	13	331979	0	0	0	85734.8	0	225670	0	218765	396842	100208	0	173766	181389	0	187746	242456	128217	137875	106735	114321	170491	115722	91134.7	191134	54021.5	102687	72240.5	23344.5	21046.5	190555	175884	0	0	192569	0
tr|M0Z714|M0Z714_HORVD	LSTEPDFLENRIPTK	587.312	3	y8	15.487	970.568	1	y	8	132159	24535.6	13681.2	14011.5	10080.3	20062.3	77642	6896.91	79400.2	151922	6387.99	11010.1	60638.8	62520.3	0	64592.1	85012.4	39505.1	45594.9	36094.3	38412.1	56766.3	35209	29769.1	67592.5	23167.7	41513.6	34802.7	11313.9	22555.4	67893.1	62452.8	16429.7	9136.31	63359.8	13483.2
tr|M0Z714|M0Z714_HORVD	LSTEPDFLENRIPTK	587.312	3	y6	15.487	728.441	1	y	6	156690	23063.8	15575.3	16625.4	11322.7	21375.3	82689.1	6181.81	85839.1	168138	7375.5	13172.4	64019.9	69077.3	13054	71982.7	100918	41666.6	45400.7	36881.2	40468.3	57469	38101.8	29874.5	74399.2	23938.6	45767.7	34012.4	14810.8	16067.6	73128	59421.7	17599	9664.94	66216.8	13235.2
tr|M0Z714|M0Z714_HORVD	LSTEPDFLENRIPTK	587.312	3	y14	15.487	823.923	2	y	14	271413	14571.8	9507.28	10633.7	7747.32	15369.1	159488	4790.23	168667	298530	0	9310.7	126447	138429	7979.38	136534	173478	91272	92866.1	72435.9	83232.2	123711	84091.1	63602.8	146466	18029.7	75253.7	49546.9	13775.4	17578.7	140670	137366	11933.5	6428.29	146317	9098.1
tr|M0Z714|M0Z714_HORVD	LLETLGLQLPFSLEANLSEMVNSPKG	934.165	3	b9	28.671	981.598	1	b	9	54732.1	47796.7	30574.2	34909.5	29247.5	46601.2	23000.5	16479.1	23459.5	51191.2	18653.3	28998.4	17462.2	18984.7	21747	19989.7	25670.4	12454.8	12891.9	7227.33	9056.12	20035.4	11341.8	8181.23	31200	31354.5	17104.5	14086.8	10587.9	7688.62	23292.9	21302.8	18517	22150.7	19809.2	30899.8
tr|M0Z714|M0Z714_HORVD	LLETLGLQLPFSLEANLSEMVNSPKG	934.165	3	b19	28.671	1035.06	2	b	19	15703.4	17671.6	8171.97	11727.4	8625.92	14053.1	8135.45	6740.3	8625.89	14897.5	5963.63	8522.26	8717.28	7155.06	8976.17	5703.59	10307.6	3841.39	4893.27	2634.3	3795.5	6810.21	4381.67	2892.57	9792.75	12016.8	6675.12	5172.46	4418.34	3750.96	9377.42	7141.81	6106.25	8612.94	5971.04	9383.35
tr|M0Z714|M0Z714_HORVD	LLETLGLQLPFSLEANLSEMVNSPKG	934.165	3	b12	28.671	1312.75	1	b	12	7457.6	4242.84	2760.14	3147.15	3411.7	4378.69	0	1713.71	2071.18	5987.9	2248.84	2660.14	1612.64	1654.41	2253.32	2116.71	3136.15	1132.57	1515.28	0	1095.81	2196.62	1442.1	1054.99	2942.21	4511.7	3202.19	2113.43	0	0	3004.79	2599.5	2360.34	2680.56	1989.3	2854.07
tr|M0Z714|M0Z714_HORVD	LLETLGLQLPFSLEANLSEMVNSPKG	934.165	3	y24	28.671	1287.66	2	y	24	17601	19975.1	9695.88	9102.38	8797.04	14045.5	8314.63	5710.56	7892.17	19937.8	8362.91	10775.9	6357.28	4893.67	6217.18	7694.96	6865	4787.55	3697.3	3368.15	3395.13	6972.43	5852.1	3039.18	9340.15	9856.85	4938.95	4367.16	5256.69	2444.38	11305.7	8396.71	7090.34	8293.36	8866.26	11050.5
tr|M0Z714|M0Z714_HORVD	LLETLGLQLPFSLEANLSEMVNSPKG	934.165	3	b5	28.671	570.35	1	b	5	45534.3	43826.2	35156.2	30522.7	27048.6	44138.2	21391	19866.5	27861.5	54688.8	19769.4	24768.6	20093.2	18570.2	17922.1	22432.3	22595.4	15841.8	13085.1	7094.61	10695.5	18956	13589.1	9078.81	29743	35033.1	18941.8	12318.9	13458.5	5474.31	26456.4	20265.2	22606.9	22531.4	22101	28138.2
tr|M0Z714|M0Z714_HORVD	LLETLGLQLPFSLEANLSEMVNSPKG	934.165	3	b6	28.671	627.371	1	b	6	73317.6	71199.2	39658.5	47817.4	34513.6	54942.2	33253.9	27223.3	28067.5	70385.9	26647.7	33075.1	21773.3	21563.1	28154	25810.3	33123.4	16937.1	14529.6	9828.43	11237.9	21438.5	16463.3	9213.18	42659.2	51102.5	31533.7	25459.3	30052.8	17981.5	33976	26263.5	22787.3	31966.3	26529.9	36874.9
tr|M0Z714|M0Z714_HORVD	EDIAGVVLFIGHVANPVVSS	1012.05	2	b15	29.835	1535.82	1	b	15	58725.3	98465	82959.6	72638.3	75046.7	51677.1	29487.5	24923.8	37334.9	66752.9	34970.3	54013.1	48761.1	42420	36486.8	38048.1	49624	28986.7	19709.5	26905.3	23687.9	28638	20355.4	17849.4	44740.9	63590	40053.9	21711.6	10236.5	10020.5	45294.8	52146.6	56325	39705.7	45935.6	53523
tr|M0Z714|M0Z714_HORVD	EDIAGVVLFIGHVANPVVSS	1012.05	2	b14	29.835	1421.78	1	b	14	29725	40652.4	34641.3	31942.1	31110.1	19195.6	11184.5	9291.14	14393	26666.3	13469.9	23468.2	20204.2	14398.8	16388.1	14298.4	21527.4	11153.4	8690.7	10644.9	11544.9	13040	8188.55	6914.13	24799.3	28718.5	20526.8	12805.3	5577.19	3407.8	19694.2	24844.4	24328.2	16982.1	18844.5	26436.1
tr|M0Z714|M0Z714_HORVD	EDIAGVVLFIGHVANPVVSS	1012.05	2	y14	29.835	1438.81	1	y	14	12439.9	13330.5	12413.1	9406.16	11118	6713.6	5010.87	3659.49	4709.45	11825	4222.92	9028.49	7807.45	5126.43	5506.41	5964.24	7557.44	3679.83	2864.61	3746.77	3749.35	4504.5	2893.96	3841.52	8743.1	12810.9	5486.11	3590.51	2415.07	1089.89	6299.94	8687.74	10009.4	5878.85	7818.29	9297.83
tr|M0Z714|M0Z714_HORVD	EDIAGVVLFIGHVANPVVSS	1012.05	2	y12	29.835	1226.65	1	y	12	11784	16596.4	11481.2	16987.6	12952.7	5922.86	7394.5	4800.52	11515.6	11505.1	6826.73	9031.11	7757.65	5255.07	3910.02	5902.11	5804.28	4258.52	5018.73	3465.53	3866.65	4951.23	2932.59	3815.49	6466.9	13511.7	4312.53	2563.07	1160.01	1544.72	8788.04	6184.59	7664.59	6365.73	9099.27	7560.7
tr|M0Z714|M0Z714_HORVD	EDIAGVVLFIGHVANPVVSS	1012.05	2	y5	29.835	488.271	1	y	5	44756.2	66143.6	62830.5	57029.4	56750.5	32255.4	20835.9	17481.9	27391.2	39505.7	30247.8	40839.8	39687.9	27138	25879.2	26354.2	32767	20499.3	16682.8	17173.2	15785.1	18354.1	14064.2	13536.2	35650	49658.5	36565.5	25686.7	14494.6	8850.74	32480.2	40121.9	41325.9	30888.5	28395.2	40021.8
tr|M0Z714|M0Z714_HORVD	EDIAGVVLFIGHVANPVVSS	1012.05	2	b16	29.835	816.941	2	b	16	7496	14523.5	8229.87	7604.53	8969.93	7312.9	3848.71	2711.04	4051.05	6428.87	4030.35	6128.98	5538.34	4360.33	3989.12	3732.03	5584.73	3852.37	2172.92	2753.86	2436.87	2683.71	2253.16	2378.1	6174.22	8421.34	4473.93	2519.09	1488.2	843.537	5368.97	4798.3	5432.58	5247.77	5001.15	5939.79
tr|M0Z714|M0Z714_HORVD	LLETLGLQLPFSLEANLSEMVNSPK	915.158	3	b9	34.3574	981.598	1	b	9	68567.6	66333.5	41478	46900.8	33809.1	69711	32396.3	21565.4	32518.7	59211.2	22877.2	59217.1	28992.9	28630.1	30262.6	31913.6	40355.9	17455.4	16240.8	9262.05	11347.6	30288	14872.1	9027.16	41466.8	53057.4	21475.3	17353.8	16002.6	0	37862.2	34511.8	101124	30694.5	26372.2	44391
tr|M0Z714|M0Z714_HORVD	LLETLGLQLPFSLEANLSEMVNSPK	915.158	3	y10	34.3574	1118.55	1	y	10	62475.1	59128.4	37411.5	46590.5	33217.2	66339.8	30304.9	21473.4	26489.3	58166.6	22532.4	54625.6	25981.6	28173.8	29249.3	29240.3	37311.7	15794.7	13425.4	8390.73	10359.7	24628.5	15006.6	8483.14	38720.2	47783.4	21285.8	18853	14433.5	208.007	34779.8	31012	100852	29818.5	27990.8	39007.9
tr|M0Z714|M0Z714_HORVD	LLETLGLQLPFSLEANLSEMVNSPK	915.158	3	y9	34.3574	1004.51	1	y	9	45708.3	43965.1	26172.9	30872.9	21749.1	42822.8	21090.5	15151.6	21300.7	40892.2	17025.8	42545.5	19571.3	18509.1	18824.3	20864.1	29006.6	11964.9	10369	6612.58	7903.83	20903.8	9370.05	6879.66	26937.9	34898.7	17607.8	12574.2	10904.6	4354.36	26730.2	22068.6	65021.5	20058.8	18426.7	31374.3
tr|M0Z714|M0Z714_HORVD	LLETLGLQLPFSLEANLSEMVNSPK	915.158	3	y11	34.3574	1189.59	1	y	11	57791.8	54711.1	34932.6	37715.2	28746.7	53004.3	24161.3	18390	25681.2	52831.7	20139.7	46074.6	25483.9	21009.6	25929.6	23894.8	32764	13960.4	15339	8433.73	10596.8	23511.2	12488	7760.76	37845.7	44645.5	17919.6	17905.8	11083.7	753.843	31958.9	26972.6	81786.3	24333.7	22945.1	35839.7
tr|M0Z714|M0Z714_HORVD	LLETLGLQLPFSLEANLSEMVNSPK	915.158	3	b17	34.3574	927.025	2	b	17	3987.05	3866.76	2734.37	2967.84	1989.11	0	1430.59	1419.58	1759.11	3570.29	0	3911.23	0	1593.54	1494.66	1696.99	0	1142.2	1133.54	609.162	573.13	1962.84	1034.32	0	0	3135.21	1194.49	0	1188.77	0	2436.27	0	0	2032.14	1581.82	3026.63
tr|M0Z714|M0Z714_HORVD	LLETLGLQLPFSLEANLSEMVNSPK	915.158	3	y17	34.3574	938.48	2	y	17	7458.55	6402.37	4328.69	6536.87	3276.27	7463.97	2795.33	3020.83	3413.85	6895.37	2863.31	9045.35	2824.96	3971.21	3001.03	3340.25	3637.82	1724.95	2860.68	1540.06	1526.1	3216.51	1593.28	595.908	5053.18	5635.32	2245.92	2389.96	1738.12	804.836	3764.44	3650.36	10054.4	3989.61	4122.2	5893.09
tr|M0Z714|M0Z714_HORVD	TFVEVDEEGTKAAAATGDVIVE	751.037	3	b19	17.0308	946.45	2	b	19	2167.9	0	0	4781.65	0	0	10660.4	7335.37	0	0	8213.94	10941.4	10109.2	6303.98	9214.95	10905.2	7340.97	7689.55	10223.8	7413	8314.54	0	8955.14	6771.7	0	8827.64	1674.75	1106.46	3804.46	9996.92	6920.92	0	0	0	9826.68	12387.5
tr|M0Z714|M0Z714_HORVD	TFVEVDEEGTKAAAATGDVIVE	751.037	3	b18	17.0308	896.915	2	b	18	7832.97	0	0	321.869	0	8991.3	8461.48	6909.19	8069.17	0	8559.19	11161.6	15390.9	11680	12103.3	13637.4	15105.2	8567.37	9681.94	9315.12	9784.55	215.248	10894.4	7807.67	5516.76	5103.79	351.812	958.779	0	1592.82	5484.38	8998.52	7848.56	8429.56	597.268	8675.06
tr|M0Z714|M0Z714_HORVD	TFVEVDEEGTKAAAATGDVIVE	751.037	3	b14	17.0308	1448.69	1	b	14	719.318	761.191	0	473.211	1528.85	6634.6	4096.72	3429.7	4498.13	0	5076.71	5178.53	6886.77	6097.16	6603.52	8378.68	9260.02	5981.72	6320.21	5086.68	5173.76	327.117	4241.38	3807.45	2715.57	2246.04	594.952	204.23	229.931	1040.88	4089.38	5890.22	4599.5	2644	0	3621.64
tr|M0Z714|M0Z714_HORVD	TFVEVDEEGTKAAAATGDVIVE	751.037	3	b16	17.0308	810.891	2	b	16	0	6591.58	52192.2	12562.6	32634.6	1233.99	2284.14	0	1363.11	33518.3	2347.84	2220.3	3486.37	2027.23	2606.63	3043.25	3471.25	2529.81	2704.98	2341.27	3463.31	1693.7	2613.74	2413.78	0	753.307	1487.2	740.341	85.0056	830.165	1378.45	0	1481.39	0	0	0
tr|M0Z714|M0Z714_HORVD	TFVEVDEEGTKAAAATGDVIVE	751.037	3	b13	17.0308	1377.65	1	b	13	0	7407.78	2651.8	967.54	1309.02	5208.79	3679.32	4649.6	4764.61	7610.03	5447	5089.05	6882.03	6165.39	6254.76	8207.12	8265.03	7238.04	6726.06	4707.65	6422.17	4898.54	6017.11	3855.97	2869.14	3977.1	3572.28	200.817	560.696	726.216	2701.65	5217.84	4786.28	5389.64	812.597	4208.39
tr|M0Z714|M0Z714_HORVD	TFVEVDEEGTKAAAATGDVIVE	751.037	3	y12	17.0308	1144.62	1	y	12	2802.79	0	25384.3	0	15031.2	0	15807.8	9427.4	20546.6	79758.4	20037.4	18482.6	3879.11	12001.2	0	0	14882.1	0	8329.69	6234.84	13004.3	0	8559.51	6671.16	0	0	0	7144.5	0	0	0	6436.82	0	5964.05	12467.2	18479.9
tr|M0Z714|M0Z714_HORVD	TFVEVDEEGTKAAAATGDVIVER	803.071	3	y8	16.5192	888.479	1	y	8	1638.9	0	7885.15	2107.31	1143.71	7290.5	6045.03	655.881	7745.74	15413	5149.41	10499.5	6768.87	1826.98	5564.78	6161.42	5158.04	0	1033.67	5715.67	2395.51	4680.09	4491.13	4198.11	14565.1	14290.9	10547.8	8632.12	3343.88	1399.45	19495.1	34507.4	31100.2	15941.8	21363.5	19978.6
tr|M0Z714|M0Z714_HORVD	TFVEVDEEGTKAAAATGDVIVER	803.071	3	y20	16.5192	1030.51	2	y	20	28061.2	6858.49	0	25982.4	15809.9	11921	10660.8	8057.06	12538.8	12102.6	11123.3	12858.3	0	14566.3	15828.5	0	0	0	0	7024.29	0	0	6402.98	4054.95	11307.9	12391	6805.56	0	0	23798.2	16317.5	22332	29919.4	19678.8	23921.9	21829.8
tr|M0Z714|M0Z714_HORVD	TFVEVDEEGTKAAAATGDVIVER	803.071	3	y21	16.5192	1080.04	2	y	21	0	0	756.569	0	0	3969.4	4006.31	0	4850.23	10520.8	5631.32	6759.17	366.786	0	3205.3	4414.01	183.24	195.302	437.9	2445.22	661.078	226.309	2612.94	2040.28	5891.14	9262.38	4515.82	995.512	268.537	0	12364.6	20744.2	19245.6	13182.5	14774.2	14338
tr|M0Z714|M0Z714_HORVD	TFVEVDEEGTKAAAATGDVIVER	803.071	3	y12	16.5192	1172.63	1	y	12	889.162	3467.01	0	2240.98	230.442	7053.71	3273.94	0	0	19885.6	4028.96	6438.34	526.914	0	4552.61	4971.74	0	111.822	766.453	3904.12	0	254.572	2950.17	1940.86	11544.3	13580.7	9191.48	0	0	528.347	10130.9	29886.4	23557.5	16245.6	19228.5	17442.8
tr|M0Z714|M0Z714_HORVD	TFVEVDEEGTKAAAATGDVIVER	803.071	3	y9	16.5192	959.516	1	y	9	369.823	9454.57	3723.07	2661.75	0	4846.45	4538.86	292.254	5835.77	9084.35	4117.12	8527.27	0	0	3683.97	5682.35	895.187	1765.13	0	3814.12	1047.36	0	3743.62	2633.29	10346.8	12515	8083.66	4378.74	8129.19	4084.54	13309.2	23921.4	21119.5	11544.2	15605	14282.4
tr|M0Z714|M0Z714_HORVD	TFVEVDEEGTKAAAATGDVIVER	803.071	3	y11	16.5192	1101.59	1	y	11	6824.4	757.581	5926.95	0	1527.92	5647.82	5296.58	2178.05	4336.15	9666.81	5435.5	4555.42	1268.9	4118.8	4725.69	6194.06	0	0	0	4079.42	237.286	0	2978.47	2522.79	9790.09	15882	9098.24	2523.37	1537.35	3138.06	16022.1	21136.5	18750.3	13963.5	16581	14666.9
tr|Q946Y9|Q946Y9_HORVU	C[CAM]SYTVWPGALPGGGVR	838.914	2	y10	18.192	880.5	1	y	10	1.59559e+06	1.32631e+06	1.30957e+06	1.0772e+06	733381	1.42202e+06	706633	648429	723681	1.28291e+06	662988	828108	888702	799809	955484	459146	638259	301837	589122	516253	511870	560234	378767	290832	1.34196e+06	1.5384e+06	1.00158e+06	460034	0	87571.7	961275	1.01014e+06	1.23921e+06	869760	902793	1.10704e+06
tr|Q946Y9|Q946Y9_HORVU	C[CAM]SYTVWPGALPGGGVR	838.914	2	y11	18.192	1066.58	1	y	11	801026	674520	665374	550922	366504	726928	357417	307976	356779	634901	317657	406142	428063	402644	472092	232041	304502	145512	284180	251784	246568	273268	190522	154072	654433	702687	436822	206866	3929.16	53014.5	485758	504301	617043	440373	450269	550555
tr|Q946Y9|Q946Y9_HORVU	C[CAM]SYTVWPGALPGGGVR	838.914	2	y12	18.192	1165.65	1	y	12	145457	122483	125436	105844	66553.3	142109	63621.2	50624.8	61417.8	114036	54591.3	69770.3	82368	72399.4	81586.3	41725.8	57051.7	27192.5	52760	44946.6	41766.3	50624.6	35518.3	27963.7	119130	127942	81466.4	43357.1	6737.18	15377.8	84393.7	93910.9	104572	82415.5	83729	104755
tr|Q946Y9|Q946Y9_HORVU	C[CAM]SYTVWPGALPGGGVR	838.914	2	y13	18.192	1266.7	1	y	13	107355	84687.4	87490.5	68471.5	45541	97616.1	41951	36364.5	42139.8	77514.1	40002.3	52195.4	50880.2	44664.9	58065.8	29144.9	36944.5	17409.3	36126	30102.1	31634.1	35118	23102.5	20984.7	81466.5	93492.7	53639.1	34253.9	0	17052.2	58663.1	63415.3	78834.8	52185.2	55477.4	73038.2
tr|Q946Y9|Q946Y9_HORVU	C[CAM]SYTVWPGALPGGGVR	838.914	2	b10	18.192	1135.52	1	b	10	0	0	0	0	0	0	0	0	0	0	0	0	0	0	0	0	0	0	0	0	0	0	0	0	0	0	0	0	1159.96	3846.72	0	0	0	0	0	0
tr|Q946Y9|Q946Y9_HORVU	C[CAM]SYTVWPGALPGGGVR	838.914	2	b9	18.192	1022.44	1	b	9	0	0	0	0	0	0	0	0	0	0	0	0	0	0	0	0	0	0	0	0	0	0	0	0	0	0	0	0	1180.55	3459.67	0	0	0	0	0	0
tr|Q946Y9|Q946Y9_HORVU	LDPGQSWALNMPAGTAGAR	956.97	2	y12	17.7009	1129.58	1	y	12	115809	99378.8	108617	78959.9	48089.3	95395.8	55600.7	42200.3	56066.6	101367	44968.1	81744.9	69668.4	57669.4	80646.5	39371.4	50765.2	19963.5	43231.7	33589.2	34249	43998.9	28583.6	18682	118226	130409	66536.3	40856.3	17454.5	22883.6	89799.6	102567	243289	75666.6	85402.2	105395
tr|Q946Y9|Q946Y9_HORVU	LDPGQSWALNMPAGTAGAR	956.97	2	y11	17.7009	1058.54	1	y	11	95866.9	87822.9	88312.2	68752.9	42590.8	85605.5	44347.9	38276.4	51757	95663.3	39885.4	67376.2	58973.2	57429.4	64914.3	33317.8	44457.1	16927.7	32640.7	28773.1	30728.3	38438.7	22244.2	15773.3	103333	115976	63570.1	47610.1	19939.7	22953.9	82925.7	96326.8	212807	67930.3	80281.1	94645.5
tr|Q946Y9|Q946Y9_HORVU	LDPGQSWALNMPAGTAGAR	956.97	2	y14	17.7009	1402.69	1	y	14	70827.8	61362.9	68804.3	48401.2	33003.9	54569.2	34614.7	29957.5	40471.9	66847.9	29523.9	52976.6	46797.5	38637.5	46372.9	23501.3	33155.9	12081.7	26853.7	24676.6	26814.8	29805.6	17266.8	13162.3	71034.5	78914.8	38025.4	29105.3	10469	12697	56367.9	63838.6	146778	49192.7	58750.7	69760.7
tr|Q946Y9|Q946Y9_HORVU	LDPGQSWALNMPAGTAGAR	956.97	2	y13	17.7009	1315.66	1	y	13	67292.9	58699.1	58121.7	42516.2	30164.9	48456.2	33561.1	26847.3	39602.5	55124.9	35104.2	41910.5	40091.4	35223.2	43416.1	23583.6	27731.3	12603.9	25304.2	20384.2	25386.3	25207.8	17313	12146.8	79623.1	75454.5	72527.7	50729	28854.7	30951	55847.2	62838.6	121741	41350.3	46877	58097
tr|Q946Y9|Q946Y9_HORVU	LDPGQSWALNMPAGTAGAR	956.97	2	b11	17.7009	1213.57	1	b	11	19001.5	13142.9	17978.4	16304.9	7894.42	11888.2	7557.24	6973.67	7805.35	15106.3	8963.77	11702.3	10233.5	11133.6	13436.7	6626.03	7421.33	4362.4	7073.42	6913.53	5366.69	10699.3	4579.36	2849.29	16297.4	18679	10706.5	8844.03	2492.15	4587.91	11949	13180.7	28168.9	9394.7	12634.3	18093.9
tr|Q946Y9|Q946Y9_HORVU	LDPGQSWALNMPAGTAGAR	956.97	2	y16	17.7009	1587.77	1	y	16	9956.97	6559.04	7341.71	5633.89	3800.65	7192.91	4712.18	3227.62	3693.01	9990.04	3330.69	6019.39	8761.12	6587.53	6740.59	4706.36	4780.36	2008.46	4749.97	3751.95	3940.91	4761.48	2768.09	1805.18	8135.69	10886.8	5615.07	4599.55	2974.22	3405.69	8460.79	8876.67	19613.3	7707.25	6854.55	8476.02
tr|Q946Y9|Q946Y9_HORVU	C[CAM]ITGDC[CAM]GGALAC[CAM]R	705.8	2	y11	8.59133	1137.48	1	y	11	502498	507792	559129	379324	263755	542980	385888	291325	326258	513777	348975	344251	355485	357161	397725	199761	328686	173219	309617	229959	219466	278431	207977	154482	372154	456693	349494	130629	27411.1	32724.8	352266	417125	503252	286596	380647	338426
tr|Q946Y9|Q946Y9_HORVU	C[CAM]ITGDC[CAM]GGALAC[CAM]R	705.8	2	y10	8.59133	1036.43	1	y	10	243406	236237	297231	176030	123277	275298	174464	136741	159397	259476	164924	167285	162812	163630	195644	99724.8	145777	74663.4	130624	121403	110278	114419	89113.6	73261.2	160815	227843	191790	67206.5	15734.6	45525.6	167503	206542	244483	131713	176666	173774
tr|Q946Y9|Q946Y9_HORVU	C[CAM]ITGDC[CAM]GGALAC[CAM]R	705.8	2	y8	8.59133	864.381	1	y	8	243230	216227	298855	181690	117300	272228	172094	122188	151317	259496	164720	166780	153471	161099	190774	104083	138550	69875.7	128383	107947	90078.7	112241	87074	55993.2	173621	227577	204224	70692.9	15031.9	53588.2	156130	191141	254193	123962	179557	171479
tr|Q946Y9|Q946Y9_HORVU	C[CAM]ITGDC[CAM]GGALAC[CAM]R	705.8	2	y9	8.59133	979.408	1	y	9	83992.1	74663.8	96756.6	55104.7	41373.1	89856.6	61961.4	45238.4	52618	86482.9	52043.5	56099.6	56751.1	53440	66153.2	35156.3	42712	24942.5	44384.1	38506	36525.6	38521.6	29678	25542.7	55462.4	73736.6	66841.8	25047.4	6106.62	18208.6	49238.8	61852.7	80377.3	43835.3	57937.3	60414.2
tr|Q946Y9|Q946Y9_HORVU	C[CAM]ITGDC[CAM]GGALAC[CAM]R	705.8	2	b10	8.59133	1005.41	1	b	10	0	0	0	0	0	0	0	0	0	0	0	0	0	0	0	0	0	0	0	0	0	0	0	0	0	0	0	6097.06	1459.31	4821.48	0	0	0	0	0	0
tr|Q946Y9|Q946Y9_HORVU	C[CAM]ITGDC[CAM]GGALAC[CAM]R	705.8	2	b11	8.59133	1076.45	1	b	11	0	0	0	0	0	0	0	0	0	0	0	0	0	0	0	0	0	0	0	0	0	0	0	0	0	0	0	0	0	2943.56	0	0	0	0	0	0
tr|Q946Y9|Q946Y9_HORVU	ELQVPGGC[CAM]ASAC[CAM]GK	717.329	2	y10	8.98412	964.398	1	y	10	900933	892038	1.00612e+06	605044	470805	815566	742008	541219	700120	969181	676750	699224	522716	569357	644984	427888	611222	262029	485776	433608	441767	549815	338923	322345	618970	781439	451541	281873	0	93266.9	666483	718051	1.02777e+06	544479	661318	691289
tr|Q946Y9|Q946Y9_HORVU	ELQVPGGC[CAM]ASAC[CAM]GK	717.329	2	y11	8.98412	1063.47	1	y	11	82759.1	87792.4	106086	57514.1	39019.3	85470.3	65864.3	51598.5	68555.6	98915.7	60798.9	65082.8	46837.8	52724.1	60041.4	37613.1	54515.1	21837.4	38904.4	43133.1	37357.8	46553.7	31510.2	23832.4	57169.5	74612.2	45045.1	25888.6	59.873	17214.4	60963.3	61591.8	113764	46709.6	64743.9	78363.9
tr|Q946Y9|Q946Y9_HORVU	ELQVPGGC[CAM]ASAC[CAM]GK	717.329	2	y9	8.98412	867.345	1	y	9	71015.2	64305.6	84492.6	46107.3	36098.5	71581.9	51643.6	36324.4	48055.7	78068.9	45814.2	50582	46435.6	42393.7	54010	32493.3	43402	19542.2	36351.4	29087.7	30752	34138.1	25562.4	20718.2	43434.9	65539.4	38997.3	22318.6	114.202	17080	48525	47318	84439.1	30630.9	44076.8	56171.1
tr|Q946Y9|Q946Y9_HORVU	ELQVPGGC[CAM]ASAC[CAM]GK	717.329	2	y8	8.98412	810.323	1	y	8	0	0	43132.8	0	0	0	0	0	0	39934.8	0	0	0	0	0	0	0	0	0	0	0	0	0	0	0	0	22801.8	13327.9	0	9885.9	0	0	43772.2	0	0	0
tr|Q946Y9|Q946Y9_HORVU	ELQVPGGC[CAM]ASAC[CAM]GK	717.329	2	b11	8.98412	1070.49	1	b	11	0	0	0	0	0	0	0	0	0	0	0	0	0	0	0	0	0	0	0	0	0	0	0	0	0	0	0	0	279.669	0	0	0	0	0	0	0
tr|Q946Y9|Q946Y9_HORVU	ELQVPGGC[CAM]ASAC[CAM]GK	717.329	2	y7	8.98412	753.302	1	y	7	0	0	0	0	0	0	0	0	0	0	0	0	0	0	0	0	0	0	0	0	0	0	0	0	0	0	0	0	64.1612	6953.01	0	0	0	0	0	0
tr|Q946Y9|Q946Y9_HORVU	DDQTSTFTC[CAM]PAGTNYQIVLC[CAM]P	1194.53	2	y12	22.1016	1332.66	1	y	12	5908.18	6198.07	3837.56	0	12063.5	0	0	0	0	0	0	3560.4	0	3862.61	0	6072.28	0	0	2655.94	0	194.976	1601.89	0	0	0	0	0	0	339.044	947.157	0	0	991.539	2486.98	0	0
tr|Q946Y9|Q946Y9_HORVU	DDQTSTFTC[CAM]PAGTNYQIVLC[CAM]P	1194.53	2	b13	22.1016	1382.55	1	b	13	1926.34	1181.16	1982.95	2348.48	0	0	903.407	325.047	1878.42	2370.39	858.737	0	841.645	1286.38	451.732	295.705	258.047	445.504	0	91.8432	385.508	243.353	881.687	864.817	1952.4	902.872	129.095	69.9591	442.644	429.804	0	844.124	143.907	0	0	1016.03
tr|Q946Y9|Q946Y9_HORVU	DDQTSTFTC[CAM]PAGTNYQIVLC[CAM]P	1194.53	2	b16	22.1016	1787.72	1	b	16	2571.89	2833.81	1953.84	585.947	427.464	304.09	0	0	0	2371.34	1804.59	1342.07	0	1185.58	0	274.121	223.711	0	215.685	95.0369	537.394	515.863	268.49	856.586	1075.01	0	0	137.779	251.946	162.414	343.058	915.579	842.287	1403.32	835	555.882
tr|Q946Y9|Q946Y9_HORVU	DDQTSTFTC[CAM]PAGTNYQIVLC[CAM]P	1194.53	2	b11	22.1016	1224.48	1	b	11	4110.79	3315.44	4431.77	0	1505.84	2169.86	785.882	897.134	2311.55	4502.07	3761.54	8131.52	3257.9	5511.33	197.759	1214.69	0	2448.56	177.297	0	424.951	481.164	2153.4	3808.14	1173.82	1267.47	0	178.495	246.438	466.209	1079.82	0	0	1582.22	8968.52	0
tr|Q946Y9|Q946Y9_HORVU	DDQTSTFTC[CAM]PAGTNYQIVLC[CAM]P	1194.53	2	y13	22.1016	1492.69	1	y	13	1071.22	1041.84	1829.21	18773.4	0	503.259	9555.27	1938.35	2726.46	0	2725.51	1338.28	2372.35	0	1044.02	0	432.13	1748.64	521.891	505.481	934.604	435.293	358.152	1963.87	0	1482.5	2692.69	263.087	1079.7	489.389	9633.37	447.883	0	899.279	2023.83	849.45
tr|Q946Y9|Q946Y9_HORVU	DDQTSTFTC[CAM]PAGTNYQIVLC[CAM]P	1194.53	2	y14	22.1016	1593.74	1	y	14	0	474.044	0	3298.29	649.377	995.324	2730.52	235.839	0	152.943	1518.11	1221.88	1766.8	203.434	825.363	224.793	2120.55	1103.82	1107.16	465.033	0	1496.32	3651.24	0	0	1105.11	2602.45	0	0	235.44	3225.93	4290.47	3477.5	501.299	2520.17	1263.82
tr|Q946Y9|Q946Y9_HORVU	GQFEHNC[CAM]PPTNYSK	560.247	3	y7	7.40575	806.404	1	y	7	65778.2	94217.8	135796	79744.9	49864	96455.7	89450.3	64243	80636.8	112884	78486.9	107582	68961.7	70923	89745.1	41912.2	75884.1	38017.8	50693.9	57201.6	60800.9	63409.5	50820.9	36216.4	62462.4	101844	68758.2	24618.6	10630.9	38718.3	68020.3	99399.7	184736	51248.4	94049.8	110099
tr|Q946Y9|Q946Y9_HORVU	GQFEHNC[CAM]PPTNYSK	560.247	3	y6	7.40575	709.352	1	y	6	54674.6	70396.7	127294	68796.9	42516.5	91290.1	80461.9	57187.1	73823.5	106602	68321.3	100925	65807.9	64913.6	83815.8	42383.9	65195	34425.7	49477.1	51456.2	54254.1	57861.1	43714.6	34301.5	51453.8	95402.8	65364.5	25221.4	8521.51	36909.8	59970.4	84327.8	200549	39901.7	88075	101899
tr|Q946Y9|Q946Y9_HORVU	GQFEHNC[CAM]PPTNYSK	560.247	3	y12	7.40575	747.328	2	y	12	55504.5	65990.1	87108.5	61038.8	36416.6	68547.8	62094.5	46253.7	53995.2	77789	49546.4	69019.8	50255.8	53662.4	67116.3	28059.7	49804.5	27984.7	37808.4	41804.4	44045.9	43756.5	33335.6	26709.6	43782.9	65808.8	56844.8	16479.3	5635.15	15811.2	57947	58251.1	128605	31821.5	62929.8	74198.7
tr|Q946Y9|Q946Y9_HORVU	GQFEHNC[CAM]PPTNYSK	560.247	3	b7	7.40575	873.331	1	b	7	25635.7	29355.4	54492.1	31918.2	20725.9	40745.9	34325.7	27347.6	32553.4	48572.6	30449.9	66835.1	32195.7	30468.3	37279.5	20949.2	28922	14453.1	24014.4	27061.1	33295.1	29524.7	21737.4	16073.2	26353.4	41991.1	25739.1	10528.6	2891.23	14437.8	25044.2	37709.5	77090.7	21317.6	41469.7	49808.8
tr|Q946Y9|Q946Y9_HORVU	GQFEHNC[CAM]PPTNYSK	560.247	3	y5	7.40575	612.299	1	y	5	15311.4	16262.1	33708.5	19002.2	10961.5	19601.8	20569.2	12907	15714.7	24773.3	16096.9	22381.6	20718.6	18385.2	19628.4	9806	15449.7	8155.84	17244.1	16085.3	14875.1	16374.3	9915.31	6679.06	12878.9	20985.9	21850.1	6965.5	3093.58	0	12538.6	22900.5	39893.9	9277.71	17566.4	25702.2
tr|Q946Y9|Q946Y9_HORVU	GQFEHNC[CAM]PPTNYSK	560.247	3	y10	7.40575	609.272	2	y	10	13142.4	15095.7	24039	16848.1	9965.82	20086.3	19967.2	10739.7	18380.8	23301.2	12308.5	22984.7	14376.8	11760	16998.4	9686.64	12585.6	8054.29	21076.8	12253.9	12897.2	14797.4	12653.3	7362.82	9778.51	14394.4	13616.5	3880.74	1394.35	8550.59	11318	15494.9	30753.9	6177.39	12971.8	19460.4
tr|M0YBZ9|M0YBZ9_HORVD	TGQVAVFWGR	560.799	2	y6	15.1462	735.394	1	y	6	153640	117305	16233.7	9082.25	68580.7	128139	81750.1	55059.7	17270.4	268842	84493	141420	30373.2	11031	8668.5	30276.7	5339.99	2125.83	31156	12294.6	13697.9	15738.7	4736.07	0	557912	653889	350546	210250	102345	82479.2	482157	335466	614561	324365	296032	457525
tr|M0YBZ9|M0YBZ9_HORVD	TGQVAVFWGR	560.799	2	y7	15.1462	834.462	1	y	7	46928.9	52201.8	1978.02	1622.54	27803.3	65401.6	33873.5	24397.4	2630.66	136093	34686.8	68292.6	5696.46	838.024	1921.99	5853.41	4884.28	2224.32	5517.33	1156.66	2496.51	3576.95	0	0	297041	366548	164903	108099	62354.5	51403.1	270498	172494	336574	169831	154424	243307
tr|M0YBZ9|M0YBZ9_HORVD	TGQVAVFWGR	560.799	2	y5	15.1462	664.357	1	y	5	68225.6	62575	1301.63	0	38941.5	79127.3	40906.2	31864.2	9300.11	115154	41512.3	70512.6	3934.97	0	2716.92	4304.23	0	0	0	4532.15	3391.22	2218.78	1755.55	13573.7	271400	339615	167920	111933	57428.4	43286.2	244151	153346	296419	137829	135448	212156
tr|M0YBZ9|M0YBZ9_HORVD	TGQVAVFWGR	560.799	2	y8	15.1462	962.521	1	y	8	0	0	1118.8	0	3973.97	0	0	0	0	0	0	0	0	637.835	709.433	0	3812.83	2274.23	759.106	339.17	1117.86	223.283	637.728	1425.61	0	0	14300	0	0	0	0	0	0	0	0	0
tr|M0YBZ9|M0YBZ9_HORVD	TGQVAVFWGR	560.799	2	y9	15.1462	1019.54	1	y	9	0	0	984.276	805.061	0	0	0	0	3175	0	0	0	2403.92	2004.9	1214.9	2511.95	0	1091.44	769.601	865.053	994.444	1377.27	346.755	1038.33	0	0	0	0	0	4687.24	0	0	0	0	0	0
tr|M0YBZ9|M0YBZ9_HORVD	TGQVAVFWGR	560.799	2	b7	15.1462	703.377	1	b	7	0	0	945.843	844.486	0	0	8942.63	6187.76	2376.05	0	9437.77	0	2565.57	0	2575.58	10012.1	1689.58	0	3827.11	0	4101.62	5137.13	473.052	0	0	0	0	0	0	5444.91	0	0	0	0	0	0
tr|M0YBZ9|M0YBZ9_HORVD	TPVQLTATPR	542.311	2	y7	9.43773	786.447	1	y	7	34814.5	43063.6	22856.9	20414.2	24817.6	72175.6	39178.9	25743.9	9885.13	129262	40147.8	92818.3	345.548	585.135	2233.67	616.628	345.935	450.692	2200.09	7790.61	5411.94	1530.81	14371.5	19770.5	185420	295438	236446	108890	35172.4	65623.6	206261	229385	297608	185155	222963	272419
tr|M0YBZ9|M0YBZ9_HORVD	TPVQLTATPR	542.311	2	y6	9.43773	658.388	1	y	6	26180.5	31431.6	18820.9	20922.5	20320.5	55605.7	34313.2	18041.2	9567.34	95000.5	30823.9	66629.4	807.184	0	2527.72	0	0	1117.04	376.8	7516.3	5668	1975.87	13100.9	13405.3	138309	238565	195834	96290.7	31957.4	68190	163837	168219	233318	146126	165599	215055
tr|M0YBZ9|M0YBZ9_HORVD	TPVQLTATPR	542.311	2	y8	9.43773	885.515	1	y	8	22680.3	22976.4	13244.6	12512.7	13438.5	34290.7	23477.6	13033.6	7977.13	66967.3	19478.1	49089.6	4471.08	1499.78	2938.24	0	2479.66	2672.02	0	7902.59	5397.71	0	9600.15	11423.9	90392.9	152905	118293	57358.6	20089.4	40710.9	110968	120292	166945	95732.7	124028	148125
tr|M0YBZ9|M0YBZ9_HORVD	TPVQLTATPR	542.311	2	b6	9.43773	640.366	1	b	6	9408.58	12424.2	6046.17	5308.33	4672.12	8421.74	0	5831.75	4170.61	13440	6097.05	8479.34	2090.03	5046.43	6408.2	1236.21	4937.77	389.98	4981.58	0	1917.16	460.014	3643.99	3482.03	12831.4	20761	23929.8	9992.62	3722.78	18550.3	14613.2	16979.8	24125	15995.9	18898.4	24656.3
tr|M0YBZ9|M0YBZ9_HORVD	TPVQLTATPR	542.311	2	y9	9.43773	982.568	1	y	9	0	0	883.88	0	797.729	0	0	1722.96	617.041	5234.29	0	0	386.334	702.672	64.7001	307.586	350.119	159.628	340.635	412.212	522.844	228.388	1073.53	1516.97	0	0	12743.8	3579.13	1609	5595.78	0	0	16054.6	0	0	14750.4
tr|M0YBZ9|M0YBZ9_HORVD	TPVQLTATPR	542.311	2	b8	9.43773	812.451	1	b	8	0	0	0	0	0	0	0	0	0	0	0	0	0	551.366	0	0	639.237	0	0	0	0	836.728	0	0	0	0	0	0	0	0	0	0	0	0	0	0
tr|M0YBZ9|M0YBZ9_HORVD	FYDDADC[CAM]AANWQR	816.331	2	y11	11.2657	1321.52	1	y	11	23046.4	15641.3	9501.78	8136.68	8318.05	24000.1	11521.6	6547.11	5036.31	55896.6	11942.1	25256.1	0	346.775	0	663.953	0	726.404	317.212	2158.42	2171.41	1413.34	1720.37	2279.05	67139.6	104026	49663.5	28579.1	7280.53	16563.4	64978.7	80078.3	104857	54329.6	79066.2	90242.9
tr|M0YBZ9|M0YBZ9_HORVD	FYDDADC[CAM]AANWQR	816.331	2	y7	11.2657	905.405	1	y	7	24300.5	15071.3	7591.38	11875	10078.6	20368.8	10696.8	9322.36	8140.19	54452.4	12837	27986.4	1874.72	1390.39	0	4926.01	1389.36	3190.07	1799.07	3377.82	2643.41	6342.08	1464.33	2825.12	65898.9	100558	49928	35010.7	8643.43	17551.8	60068.2	70222.9	95157.3	48017.8	68688	82486
tr|M0YBZ9|M0YBZ9_HORVD	FYDDADC[CAM]AANWQR	816.331	2	y8	11.2657	1020.43	1	y	8	22008.5	14024.2	13393.6	10410.4	8170.8	21884.5	9582.8	7482.4	6953.34	51348.4	11928.1	21703.4	4100.24	1119.14	1612.22	3465.24	0	346.773	0	2761.52	2770.78	1828.88	2950.21	2207.52	59405.1	87501.4	45352	24992.4	7382.84	18046.9	52504.2	74166.7	89175.9	44287	65609.6	79121.7
tr|M0YBZ9|M0YBZ9_HORVD	FYDDADC[CAM]AANWQR	816.331	2	y9	11.2657	1091.47	1	y	9	11984.5	9965.49	7460.31	3728.07	5708.05	10469.6	6375.76	5086.2	3435.48	28102.9	7499.81	13757.1	3201.32	4158.76	5655.08	524.792	3227.82	0	3036.6	1186.55	766.714	2753.57	1573.08	1223.59	37273.9	58941.3	26508.3	16018.3	3331.28	10744.5	32735.3	40733.1	53128.1	28882	40431.7	44607.5
tr|M0YBZ9|M0YBZ9_HORVD	FYDDADC[CAM]AANWQR	816.331	2	y10	11.2657	1206.5	1	y	10	11849.9	5963.17	6150.32	8040.09	3670.17	12895	6206.74	3186.8	2977.94	26744.4	7276.04	13321.2	688.054	2560.16	2494.91	568.377	2999.76	253.823	2342.25	1288.91	2310.02	245.875	2480.64	1012.02	34961.3	46870.7	26162.3	15904.9	3377.03	10172.8	29531.1	39272.5	46614.6	26800.1	33540.6	40858.5
tr|M0YBZ9|M0YBZ9_HORVD	FYDDADC[CAM]AANWQR	816.331	2	y12	11.2657	1484.59	1	y	12	0	907.679	1372.69	1286.02	1689.87	2345.19	1511.58	0	840.673	5338.76	1135.83	1947.72	486.64	109.392	969.964	698.445	498.142	542.041	1045.8	92.4821	342.773	310.52	1097.12	0	5412.24	6695.69	3645.84	2070.84	0	2095.61	5184.29	6276.91	7560.49	3540.27	5693.3	6406.01
tr|M0YBZ9|M0YBZ9_HORVD	NLYYGVIQVVQK	712.401	2	y8	18.4092	870.541	1	y	8	25829.5	25354.1	12187.1	13823.1	15101.8	30793.1	18526.1	16019.3	6624.33	67413.9	18203.4	36644.1	0	154.299	179.503	0	267.416	51.7322	0	253.4	0	0	58.7856	38.073	166984	189649	107891	566.818	0	2565.5	144263	136787	181914	123951	128902	166714
tr|M0YBZ9|M0YBZ9_HORVD	NLYYGVIQVVQK	712.401	2	y9	18.4092	1033.6	1	y	9	28280	29386.6	11657.7	12815.1	19016.7	31274.8	19868.6	16915.3	10068.8	75381.7	19058.1	36243.5	0	0	0	117812	620.819	0	3237.01	0	517.412	0	0	0	173505	185013	82972.4	0	513949	1742.96	159646	151345	192755	137009	140769	188824
tr|M0YBZ9|M0YBZ9_HORVD	NLYYGVIQVVQK	712.401	2	y10	18.4092	1196.67	1	y	10	35058.7	29698.2	17564.5	17487.5	19000.6	28658.2	22855.1	16782.4	0	59457.7	21188.7	32680.2	0	612.933	1657.47	0	4594.33	0	0	249.426	99.4988	2257.61	421.013	200.977	128911	155602	87286.8	1196.29	26896.6	0	118741	112628	143148	103445	100332	139496
tr|M0YBZ9|M0YBZ9_HORVD	NLYYGVIQVVQK	712.401	2	y7	18.4092	813.519	1	y	7	4162.89	4729.54	1902.85	2317.03	1783.87	4365.7	2188.6	2146.73	1498.57	8732.62	2860.1	3601.31	1340.49	93.8789	79.3595	0	105.973	91.7933	0	955.422	34.1337	117.621	31.6292	0	18407.7	25416.4	17883.9	2340.63	0	7908.29	16737.3	15006.1	20081.7	14378.3	12410.4	19637.3
tr|M0YBZ9|M0YBZ9_HORVD	NLYYGVIQVVQK	712.401	2	b7	18.4092	823.435	1	b	7	2599.8	7792.13	3794.81	0	1711.3	2841.93	0	0	0	12571.2	0	4067.24	3729.35	0	316.536	0	0	1701.26	2662.46	1037.83	1693.85	0	0	1801.17	17241.1	20888.7	0	6611.22	0	11813.4	14649.5	19130.9	19248.7	13699.5	13091.9	28111.2
tr|M0YBZ9|M0YBZ9_HORVD	NLYYGVIQVVQK	712.401	2	b9	18.4092	1050.56	1	b	9	0	0	0	0	0	0	0	0	0	0	0	0	983.076	0	0	1.23363e+06	0	0	5528.68	0	0	0	0	0	0	0	0	2371.21	157820	0	0	0	0	0	0	0
tr|M0YBZ9|M0YBZ9_HORVD	QWDKWTAAYPSAQIYLGLPASEQK	917.797	3	y10	22.1114	1105.59	1	y	10	9069.91	5875.54	2964.97	5075.37	4319.52	6047.03	0	4727.42	2458.64	22643.3	1455.06	11034.2	620.552	665.894	846.168	0	652.063	2255.2	600.156	0	370.838	2150.76	308.706	2950.18	48031	58665.1	24272.6	18749.9	6195.97	11853	43577	46490.3	52704.3	38670.9	36859.2	50823
tr|M0YBZ9|M0YBZ9_HORVD	QWDKWTAAYPSAQIYLGLPASEQK	917.797	3	b9	22.1114	1150.53	1	b	9	6022.72	3187.19	2427.19	0	2426.74	4073.79	0	2436.07	1864.84	12239.4	3057.36	6772.1	10221.8	2233.93	0	45363.9	4893.95	0	7771.86	1403.49	0	0	5315.38	2138.7	27761.1	31113.3	12539.7	14605.2	252.496	6469.77	26177	26706.3	29602.9	24452.3	21325.3	33228.9
tr|M0YBZ9|M0YBZ9_HORVD	QWDKWTAAYPSAQIYLGLPASEQK	917.797	3	y9	22.1114	942.525	1	y	9	4561.05	4247.23	3512.89	0	2412.08	4047.01	661.647	2683.97	1131.21	11582.7	356.763	7274.92	211.982	0	2390.48	0	444.003	851.269	0	0	0	231.087	0	866.335	29678.9	37353.8	15052	12687.3	2237.94	9997.85	25278.3	26658.1	36102.9	21102.2	22388.7	35082.6
tr|M0YBZ9|M0YBZ9_HORVD	QWDKWTAAYPSAQIYLGLPASEQK	917.797	3	b8	22.1114	987.468	1	b	8	2430.22	1651.44	1515.66	1946.8	0	1942.59	1391.84	0	0	5400.28	0	4697.36	339.468	7746.22	791.802	18200.7	1647.92	0	2215.91	1314.52	0	0	1009.59	2785.2	14782.6	15875.8	9919.91	8392.95	5478.17	2986.56	13389.3	16515.4	19675.1	12060.4	10411.9	15210.8
tr|M0YBZ9|M0YBZ9_HORVD	QWDKWTAAYPSAQIYLGLPASEQK	917.797	3	b16	22.1114	961.975	2	b	16	795.651	0	0	309.004	451.29	0	2380.79	0	0	0	295.84	620.297	4525.62	3353.35	4084.56	0	2941.48	397.496	1932	1796.15	218.216	485.688	1189.66	0	0	0	0	0	0	0	0	0	0	0	0	0
tr|M0YBZ9|M0YBZ9_HORVD	QWDKWTAAYPSAQIYLGLPASEQK	917.797	3	b18	22.1114	1047.03	2	b	18	0	0	87.0367	98.9957	0	0	383.043	0	0	0	233.452	0	237.886	364.649	741.018	0	1164.94	280.844	494.671	228.682	416.378	295.979	942.868	191.775	0	0	0	0	450.01	1045.48	0	0	0	0	0	0
tr|M0YBZ9|M0YBZ9_HORVD	ALATGLVGR	429.264	2	y7	10.2502	673.399	1	y	7	84231.4	192798	53597.5	61856.1	125770	269438	91163.6	113739	28662.1	437300	150775	338172	57903.5	0	4189.21	57730.3	0	0	0	0	601.93	0	28988.8	98948	588585	844359	709396	284638	131075	147183	622719	652573	817985	542592	660984	799742
tr|M0YBZ9|M0YBZ9_HORVD	ALATGLVGR	429.264	2	y5	10.2502	501.314	1	y	5	45319.5	39746.3	25541.3	27602.4	28002.8	94746.6	53077.7	22914.5	12379.7	160230	44109.3	120214	0	1208.54	253.102	0	2034.85	2458.27	5037.83	3940.53	0	0	12638.5	19454.4	227358	354749	325122	125756	72204.9	106237	235193	245809	344733	213156	258143	325375
tr|M0YBZ9|M0YBZ9_HORVD	ALATGLVGR	429.264	2	y6	10.2502	602.362	1	y	6	53489	66212.1	40102.1	40708.8	37852.6	108911	65153.5	30737	16262.8	190706	52616.5	131917	0	0	3820.87	6735.95	0	3681.76	8841.47	0	0	0	23239.7	23628.2	284501	419832	368605	60938.1	79126.7	103555	290297	297420	402772	251161	314622	398573
tr|M0YBZ9|M0YBZ9_HORVD	ALATGLVGR	429.264	2	y8	10.2502	786.483	1	y	8	0	0	0	0	0	0	0	0	0	0	0	0	0	290.308	137.359	0	593.686	0	959.121	0	375.12	24.2954	0	0	0	0	0	0	0	5468.74	0	0	0	0	0	0
tr|M0YBZ9|M0YBZ9_HORVD	ALATGLVGR	429.264	2	b8	10.2502	683.409	1	b	8	0	0	0	0	0	0	0	0	0	0	0	0	1803.19	4472.18	1970.02	0	2172.84	630.64	0	8042.11	281.597	623.613	0	0	0	0	0	0	0	0	0	0	0	0	0	0
tr|M0YBZ9|M0YBZ9_HORVD	ALATGLVGR	429.264	2	b6	10.2502	527.319	1	b	6	5092.99	0	5411.54	3407.79	4600.62	0	0	0	1559.01	0	3764.2	0	3417.31	562.691	0	4179.09	0	1303.68	1753.79	332.827	0	1475.4	1576.66	2548.14	0	0	0	0	0	10676.6	0	0	0	0	0	0
tr|M0XY51|M0XY51_HORVD	ASYDDAGLGPVPAGWK	802.391	2	y10	16.2465	981.552	1	y	10	53968.2	53936.3	47070.3	37330.4	26212.5	34476.3	16282.7	15345.2	22654.5	39212.1	27012.5	3236.62	23783.1	16558	22131.8	21810.2	0	16837.4	10878.5	7836.69	9661.44	851.239	10123.5	3734.62	36722.9	41684.9	21657.1	705.405	715.44	0	1219.67	23328.9	30912.9	19259.3	24292.8	25669.1
tr|M0XY51|M0XY51_HORVD	ASYDDAGLGPVPAGWK	802.391	2	y11	16.2465	1052.59	1	y	11	9654.42	4897.46	5594.82	4973.81	3308.76	5135.17	3176.23	4170.34	4428.98	8221.42	4859.49	1093.58	8277.94	5811.69	10507.9	9829.66	567.581	4125.67	3146.97	2679.11	2879.44	0	2777.45	1231.61	9370.89	14483	0	4429.64	2359.13	12763.5	0	6371.53	7969.54	3986.26	6326.95	6032.07
tr|M0XY51|M0XY51_HORVD	ASYDDAGLGPVPAGWK	802.391	2	y9	16.2465	924.53	1	y	9	6000.41	5252.79	7961.97	5353.45	4050.75	6630.45	4517.72	3547.5	4384.57	7563.84	3840.48	781.541	5685.36	3799.52	3763.42	4773.75	1116.51	1823.97	2443.25	2022.57	2871.3	0	2744.85	1074.35	6494.21	10688	5803.42	596.596	4166.52	4198.73	0	7301.81	8589.56	5121.01	5581.13	7357.05
tr|M0XY51|M0XY51_HORVD	ASYDDAGLGPVPAGWK	802.391	2	b9	16.2465	850.358	1	b	9	2854.24	4028.22	1431.04	1022.43	1248.7	0	789.794	3156.15	2862.8	0	6258.74	0	0	4782.98	8646.65	0	0	0	0	2227.68	1086.93	2463.67	0	1505.96	3317.31	3531.42	1106.28	622.739	0	17740.7	2057.35	2264.45	3261.55	2113.45	3307.49	1777.03
tr|M0XY51|M0XY51_HORVD	ASYDDAGLGPVPAGWK	802.391	2	y13	16.2465	1282.64	1	y	13	3673.77	3817.48	5759.45	3659.65	2920.38	4735.53	3289.47	3753.6	2909.16	9019.29	7318.17	0	3349.05	0	3581.44	2713.61	2849.8	1258.93	3853.19	1815.75	1795.48	2984.61	0	497.551	5554.71	7069.38	4049.86	919.004	0	42769.9	2255.92	5984.58	6082.05	6730.23	5017.17	5431.96
tr|M0XY51|M0XY51_HORVD	ASYDDAGLGPVPAGWK	802.391	2	b11	16.2465	1046.48	1	b	11	3771.42	4321.41	4643.7	2873.56	3613.21	2932.36	0	2128.98	1315.65	7999.78	2449.88	666.682	1144.67	1994.32	1065.04	2729.65	1602.59	1151.01	0	735.206	858.176	8396.11	1561.22	645.35	3699.86	3772.42	488.098	592.02	7066.31	1095.33	3319.49	3677.49	7673.95	4813.22	3663.43	6939.26
tr|M0XY51|M0XY51_HORVD	VC[CAM]WVGGC[CAM]FSSDILK	814.384	2	y10	21.2981	1083.51	1	y	10	17841.7	4978.01	5602.01	0	5946.81	10726.6	3284.4	5264	7599.53	28882.3	5378.99	11620.8	10818.1	0	3393.18	0	854.751	1268.94	36042.2	0	6325.73	0	9932.31	6763.98	52811.5	57942.5	25523.2	3908.7	13971.1	12251.9	40927.7	38477.1	51841.3	39273	41278.4	53344.2
tr|M0XY51|M0XY51_HORVD	VC[CAM]WVGGC[CAM]FSSDILK	814.384	2	y11	21.2981	1182.58	1	y	11	4925.63	1820.68	3174.57	396.115	3235.17	4032.57	3182.68	1924.13	2096.68	7116.23	1767.37	4200.34	0	0	3179.17	2570.28	2844.57	3375.12	0	499.481	0	0	0	0	20863.8	24901.7	8867.47	2877.94	5271.45	7267.24	16784.1	14933.2	19665.3	13801.4	14383.7	18840.4
tr|M0XY51|M0XY51_HORVD	VC[CAM]WVGGC[CAM]FSSDILK	814.384	2	y12	21.2981	1368.66	1	y	12	5501.93	920.739	1520.33	216.916	2017.06	4693.78	856.82	2287.16	586.531	11264.5	1714.87	4920.44	1776.88	364.331	392.416	595.09	503.331	630.364	4628.84	0	888.221	198.093	976.16	714.013	18431.3	25619.1	11461.6	394.975	6041.19	6212.31	15734.2	12777.7	19188.6	13505.4	13325.8	19619.7
tr|M0XY51|M0XY51_HORVD	VC[CAM]WVGGC[CAM]FSSDILK	814.384	2	y9	21.2981	1026.49	1	y	9	0	0	0	6232.78	10633.3	0	1229.07	6821.05	1953.04	0	8821.5	8122.44	0	6436.46	0	2393.83	0	306.618	0	5494.11	0	3509.13	0	0	13708.4	17485.6	10863.2	4543.92	0	3846.83	11716.9	10783.7	13680.2	11247	14719.3	13730
tr|M0XY51|M0XY51_HORVD	VC[CAM]WVGGC[CAM]FSSDILK	814.384	2	y8	21.2981	969.471	1	y	8	0	3731.32	4190.93	2731.87	0	0	1322.59	0	2494.28	0	0	0	22838.5	952.038	1606.24	0	0	1617.99	79385.9	1303.31	15223.8	1091.49	18155.6	10347.4	0	0	0	0	0	0	0	0	0	0	0	0
tr|M0XY51|M0XY51_HORVD	VC[CAM]WVGGC[CAM]FSSDILK	814.384	2	b13	21.2981	1481.66	1	b	13	670.357	267.094	1434.38	185.282	571.769	0	311.047	0	344.112	2252.25	2059.59	0	0	463.961	136.73	1825.89	0	389.233	0	0	0	435.224	0	0	0	0	0	415.518	0	0	0	0	0	0	0	0
tr|M0XY51|M0XY51_HORVD	VGVQPSPVVAAFSSR	750.912	2	y11	16.5594	1117.6	1	y	11	31197.8	22254.9	12902.6	13196.5	15520.8	37668.1	10802.5	7214.35	7917.5	63654.8	1567.32	28244.4	2150.83	237.756	1861.01	1125.78	250.421	1351.06	3673.71	540.091	1336.09	1261.37	416.108	2151.59	106446	109286	58910.6	40623	16566.5	20272.9	83020.7	1259.48	107444	54517.1	52864.3	88280.2
tr|M0XY51|M0XY51_HORVD	VGVQPSPVVAAFSSR	750.912	2	y9	16.5594	933.515	1	y	9	6699.04	6900.4	4077.23	5131.28	4390.48	8430.25	3423.53	2593.91	2615.8	13352.8	1813.62	5708.67	0	453.8	742.751	599.173	0	950.708	1226.92	0	120.791	532.423	1535.8	1146.1	24592.7	30973.4	10743.5	10326.1	4125.29	6661.75	17777.3	0	22441.4	12565.2	11384.7	16532.3
tr|M0XY51|M0XY51_HORVD	VGVQPSPVVAAFSSR	750.912	2	y10	16.5594	1020.55	1	y	10	4481.2	1845.91	806.033	3451.42	1141.03	4222.84	1326.83	1697.15	941.934	6633.22	2409.42	3251.63	3389.78	0	487.296	0	1551.23	661.689	1224.54	648.181	208.491	0	889.235	126.412	12299.1	12534.9	6175.07	4575.52	3126.99	7045.15	7384.55	0	10683.1	6592.68	5775.54	7644.82
tr|M0XY51|M0XY51_HORVD	VGVQPSPVVAAFSSR	750.912	2	y12	16.5594	1245.66	1	y	12	1521.65	944.424	1385.08	423.007	0	0	551.073	0	0	0	218.772	2466.85	730.463	911.033	828.114	0	3357.06	348.61	0	849.933	855.561	460.224	481.864	124.781	0	0	0	0	648.474	1776.33	0	1040.81	0	0	0	0
tr|M0XY51|M0XY51_HORVD	VGVQPSPVVAAFSSR	750.912	2	y8	16.5594	836.462	1	y	8	0	1265.14	733.604	512.404	0	0	1089.41	153.145	467.613	0	827.499	0	2604.27	2061.72	3503.51	3353.31	3666.18	1079.29	0	357.394	464.73	1189.78	995.877	374.905	0	0	0	0	0	0	0	1517.32	0	0	0	0
tr|M0XY51|M0XY51_HORVD	VGVQPSPVVAAFSSR	750.912	2	b9	16.5594	863.499	1	b	9	0	2294.58	1120.59	2040.46	0	0	915.656	2328.46	3754.06	0	330.662	0	0	937.974	276.658	1318.93	0	0	1055.98	0	1330.92	1117.4	0	474.376	0	0	4715.53	0	13020.9	14180.3	0	497.68	0	0	0	0
tr|M0XY51|M0XY51_HORVD	TYSVAALNYPSFSATFPAAGGTEK	817.401	3	y9	22.1761	877.441	1	y	9	19540.7	0	0	10397	13087.5	4202.57	3120.85	0	14285	0	21587.1	0	8792.63	3893.56	11589	0	0	4652.23	16765.3	12461.7	2884.57	0	0	0	9049.59	10868.7	1494.63	4165.16	3241.86	3498.24	7188.17	7239.77	8357.7	7392.36	7422.27	12333.3
tr|M0XY51|M0XY51_HORVD	TYSVAALNYPSFSATFPAAGGTEK	817.401	3	y11	22.1761	1049.53	1	y	11	0	8922.29	0	310.668	0	2169.53	0	546.813	1264.59	4881.99	429.085	1673.11	0	1531.65	2052.75	1609.09	1937.59	1065.02	1426.77	782.45	834.409	6665.66	460.11	1204.3	4515.74	6802.47	3127.44	3154.73	2394.67	6704.59	3110.64	4165.88	5399.29	3518.22	3768.44	3984.17
tr|M0XY51|M0XY51_HORVD	TYSVAALNYPSFSATFPAAGGTEK	817.401	3	b9	22.1761	983.483	1	b	9	958.019	0	609.585	1201.59	543.298	1209.1	924.285	1486.29	1193.22	1850.95	2323.7	1147.32	1407.42	871.847	1322.74	4087.24	0	1271.51	768.886	0	2919.99	4080.9	1086.66	1274.41	3235.6	6053.3	0	3244.55	2026.67	2486.74	2933.39	3698.55	4876.35	3141.77	4129.91	4299.64
tr|M0XY51|M0XY51_HORVD	TYSVAALNYPSFSATFPAAGGTEK	817.401	3	y10	22.1761	978.489	1	y	10	5023.29	2835.51	389.307	0	1819.29	2565.9	4871.48	3754.66	0	6570.84	0	2363.69	4848.06	0	2323.11	0	1384.28	0	2769.17	0	655.45	3249.96	540.18	2592.18	9511.35	11286.1	9335.86	3930.89	2504.66	811.252	4996.45	6207.14	9015.39	7952.45	7825.67	8367.74
tr|M0XY51|M0XY51_HORVD	TYSVAALNYPSFSATFPAAGGTEK	817.401	3	y15	22.1761	1467.71	1	y	15	0	205.205	3340.34	430.169	0	2324.09	394.659	191.771	0	1247.04	0	492.884	0	1175.67	1039.34	334.488	0	526.081	0	0	1314.35	0	583.058	185.62	4372.25	4610.79	0	2460.97	723.967	168.097	3332.78	3660.43	2432.64	5638.48	3172.67	3968.26
tr|M0XY51|M0XY51_HORVD	TYSVAALNYPSFSATFPAAGGTEK	817.401	3	y12	22.1761	1136.56	1	y	12	1224.02	1807.51	431.93	896.042	1649.4	3953.74	2965.51	1142.87	2042.01	3722.97	1586.89	2742.15	0	4174.41	0	3165.87	2896.29	225.825	2273.36	561.366	4660.54	801.235	3120.42	0	6207.58	8010.38	16859.9	0	0	0	3367.04	4116.19	4563.57	2641.35	4443.71	5228.42
tr|M0XY51|M0XY51_HORVD	TYASSDPKPTANIVFAGTK	656.674	3	y17	12.4329	852.452	2	y	17	6673.64	6359.67	4212.52	2057.1	3329.05	6059.16	5195.7	1731.07	824.242	15477.6	4145.11	7259.15	3048.15	5776.31	4865.31	3343.88	1278.99	0	900.543	0	1955.06	3518.47	118.888	1394.53	26910.5	32359.2	14685.1	9976.04	4658.47	0	21711.1	19670.5	25076.8	19389.1	22525.8	26987.7
tr|M0XY51|M0XY51_HORVD	TYASSDPKPTANIVFAGTK	656.674	3	y11	12.4329	1118.62	1	y	11	17632.1	15239.9	14227.6	617.227	8239.85	12992.5	344.851	6784.81	1181.56	11446.1	8932.1	12858.9	0	0	0	0	364.567	921.435	0	384.059	9691.34	14368.7	0	4632.36	30006.3	40353.3	26574.9	25228.1	10670	0	25151.8	28431.2	33278.9	22285.9	23342.7	32853.6
tr|M0XY51|M0XY51_HORVD	TYASSDPKPTANIVFAGTK	656.674	3	y16	12.4329	816.933	2	y	16	2560.98	1521.75	1331.27	0	1189.47	1958.62	704.502	879.306	0	4849.21	1220.53	2275.01	1160.02	323.277	0	0	1261.29	466.639	0	0	0	1087.45	120.406	361.809	7718.71	8493.35	3990.34	3359.57	800.911	961.911	5727.62	5266.66	9106	6005.83	6716.45	8248.76
tr|M0XY51|M0XY51_HORVD	TYASSDPKPTANIVFAGTK	656.674	3	y15	12.4329	773.417	2	y	15	499.876	0	280.336	1645.21	712.52	0	0	0	0	0	984.876	1500.82	2400.46	1025.56	596.98	1074.53	1016.54	0	664.474	1356.15	575.964	0	2563.85	916.024	2734.49	2983.7	532.483	628.124	727.316	9875.5	1743.41	0	2690.65	1647.11	2100.45	1351.89
tr|M0XY51|M0XY51_HORVD	TYASSDPKPTANIVFAGTK	656.674	3	y7	12.4329	735.44	1	y	7	0	1769.95	0	0	0	0	3979.89	0	3812.56	913.849	0	927.099	0	1388.22	277.893	1797.01	0	4175.14	1254.13	323.939	523.308	0	596.174	0	2190.78	3036.73	1028.67	2009.65	0	2630.08	1525.65	2038.28	1590.88	1451.44	1988.27	2329.71
tr|M0XY51|M0XY51_HORVD	TYASSDPKPTANIVFAGTK	656.674	3	y9	12.4329	920.52	1	y	9	2110.32	1930.08	1005.69	0	1054.01	1235.45	707.734	440.46	598.916	3972.89	0	0	0	766.066	175.407	356.887	0	982.386	744.945	93.9797	0	0	118.161	0	3345.07	4457.77	7933.77	1437.45	594.257	1458.4	3549.99	2422.18	2390.24	2142.44	2586.08	3137.18
tr|M0Z9Q3|M0Z9Q3_HORVD	NVTAGLIEEILPAGSIADTTR	714.386	3	y10	26.2264	988.506	1	y	10	1.86475e+06	1.63939e+06	1.23681e+06	1.43134e+06	1.06025e+06	1.95008e+06	1.06262e+06	881440	1.21112e+06	1.68828e+06	947518	1.24513e+06	1.41031e+06	1.38148e+06	1.47203e+06	1.45177e+06	1.61826e+06	1.07566e+06	1.01593e+06	802727	888553	1.11178e+06	858794	659493	1.00221e+06	1.08443e+06	688428	2903.67	138837	95957.5	795855	909040	976387	784955	943671	1.0319e+06
tr|M0Z9Q3|M0Z9Q3_HORVD	NVTAGLIEEILPAGSIADTTR	714.386	3	y8	26.2264	820.416	1	y	8	664860	539977	365326	437467	313028	694041	299864	251438	347572	549616	256887	379878	408131	423156	443859	448083	503830	302853	269989	203649	234298	304756	221007	162750	277740	322056	203633	0	56115.5	54333.4	203007	239693	272268	214545	258378	303491
tr|M0Z9Q3|M0Z9Q3_HORVD	NVTAGLIEEILPAGSIADTTR	714.386	3	y9	26.2264	891.453	1	y	9	440391	370047	248178	309098	203567	449185	190600	151372	230529	376332	173474	251522	286200	288324	288020	300240	321428	193221	176529	134728	164530	209193	147857	110130	182366	215369	137842	1204.67	30523.1	32320.2	138764	167490	171525	134854	173056	199058
tr|M0Z9Q3|M0Z9Q3_HORVD	NVTAGLIEEILPAGSIADTTR	714.386	3	b10	26.2264	1040.56	1	b	10	286316	238813	188782	220811	153459	307271	157062	129040	168788	248478	135869	186371	201576	204422	210887	216077	229761	161267	150040	113155	132298	162298	128793	92897.5	143223	146755	102155	6796.61	29757.2	23831.5	114076	131501	152219	121916	143922	150760
tr|M0Z9Q3|M0Z9Q3_HORVD	NVTAGLIEEILPAGSIADTTR	714.386	3	b9	26.2264	927.478	1	b	9	392746	319510	237594	296414	200190	402031	190515	164888	227039	341162	176051	243700	272022	263765	271967	292675	313427	195712	183044	138167	157736	207888	154848	116390	192581	206318	135656	7111.01	35829.7	33511.3	145421	169976	184944	146758	175967	198142
tr|M0Z9Q3|M0Z9Q3_HORVD	NVTAGLIEEILPAGSIADTTR	714.386	3	y11	26.2264	1101.59	1	y	11	246912	201380	148186	174546	114993	254297	113930	96034.6	131255	213759	105322	141303	156213	167257	174157	174585	188362	112777	112120	82490	92811.8	124129	94719.6	68941.2	116887	140462	99111.2	0	37315.7	65910.1	88813.1	98058.4	111917	89371.8	103606	117711
tr|M0Z9Q3|M0Z9Q3_HORVD	NVTAGLIEEILPAGSIADTTR	1071.08	2	b11	26.2248	1153.65	1	b	11	48539.4	39297.1	26430	29918.3	20074.5	54289.4	18114	12776.8	22493.5	40696.2	13859.4	27427	23689.8	26943.4	29435.9	31308.3	34033.4	17718.3	15884.4	11271.7	13101.4	17582.3	11661.6	9149.78	18696.1	24280.1	12591.5	7850.2	3763.06	7833.29	11155.8	15390.8	18094.7	12725.5	14930	21019.3
tr|M0Z9Q3|M0Z9Q3_HORVD	NVTAGLIEEILPAGSIADTTR	1071.08	2	y11	26.2248	1101.59	1	y	11	338228	244532	179644	209659	123939	321280	120648	84779.7	127645	263671	93050	161665	161973	162790	167948	156454	202603	92629.6	95993.4	61868.8	76471.1	115047	72081.7	52279	118825	144824	81229.5	53230	29655.8	39625.7	78697.6	104106	133356	81825.6	108033	129118
tr|M0Z9Q3|M0Z9Q3_HORVD	NVTAGLIEEILPAGSIADTTR	1071.08	2	y14	26.2248	1472.76	1	y	14	253674	188617	134976	147787	91740.3	244541	89175.3	64650	100797	202865	74904.2	130933	125666	127374	128481	123346	163631	73634.8	72106.3	52546.5	57818.4	85292	57328	40708.6	97390.6	102960	53244.6	30256.4	12689.9	19134.5	63356.8	81088.1	99678.7	60450.2	73890.3	100926
tr|M0Z9Q3|M0Z9Q3_HORVD	NVTAGLIEEILPAGSIADTTR	1071.08	2	y15	26.2248	1585.84	1	y	15	167347	118261	90990.9	97629.5	59188	161752	58980.2	41673.4	65104.2	126938	47019.2	79515.9	79754.1	78225.9	80157.5	80131.8	97715.7	45436.8	48083.8	33502.2	36222.5	58703.4	40332.8	24394.8	55233.2	68927.2	35524.5	25398	10670.3	16464.3	36908.1	55725	64763.3	41897.7	51105.6	61020.3
tr|M0Z9Q3|M0Z9Q3_HORVD	NVTAGLIEEILPAGSIADTTR	1071.08	2	y12	26.2248	1214.67	1	y	12	149819	110812	86400.8	94220.1	58615.6	147838	54371.5	40531.3	57921.3	131753	40598.8	76769.9	81538.1	74905.6	75906	76328.6	93991.3	42758.2	44268.6	29673.2	36749.8	52832.4	34219.6	25214.3	52557.9	66904.4	37176.6	19996.8	11624.8	15874.7	34266.8	47750.7	58555.4	37869.7	46737.9	56603.7
tr|M0Z9Q3|M0Z9Q3_HORVD	NVTAGLIEEILPAGSIADTTR	1071.08	2	y13	26.2248	1343.72	1	y	13	128104	102082	68757.4	78276.5	46314.3	128841	45309.4	33953.4	48608.1	111374	37169.5	64544.7	63516.6	66758.3	65032.4	68566	82476.7	37750.8	36260.1	29128.7	30796.7	42827.8	30376.4	21410.6	49680	57807.9	31603.9	18770.2	9194.32	12544.6	30680.9	42750.1	50111	31017.8	40126	50767
tr|M0Z9Q3|M0Z9Q3_HORVD	APEAATQVNTWVK	707.87	2	y9	12.2299	1046.56	1	y	9	85303.1	55501.1	47354.4	53550.5	34700.2	93789.2	33142.7	23030.8	35140.6	68070.3	26519.6	51765.1	35884.5	38640.6	40933.4	39981.9	54887.1	28172	18573.2	18132.1	21191.1	28171.1	16523.2	13714.1	29492.6	42386.7	21669.6	15686.1	3416.51	6897.71	22878	26976.7	41558	22917.5	31129	37093.7
tr|M0Z9Q3|M0Z9Q3_HORVD	APEAATQVNTWVK	707.87	2	y10	12.2299	1117.6	1	y	10	73167.3	57043	42745.8	51645.9	31562.5	90870.8	30420	22173.3	31157.6	67058.5	27598.4	48179	35366.4	38384.3	41978.4	40085.4	51233.6	26282.6	17789.1	16600.1	19631.9	27441	15725.9	13933.4	27983	37598.1	19490	16080.1	3598.85	7613.8	18256.2	24175.3	40108.4	24918.9	27919.2	39276.3
tr|M0Z9Q3|M0Z9Q3_HORVD	APEAATQVNTWVK	707.87	2	y8	12.2299	975.526	1	y	8	116362	78631.1	59051.1	67955.9	43896.1	126274	44532.4	30840.5	41167.2	93642.7	33082	66616	47239.6	53576.3	52455.2	56835.1	71601.6	42188.8	22930.2	23855.1	33316.9	37326.4	23764.4	19535.4	44132.8	53931.3	27510.7	20243.1	4557.39	10891.2	29837.7	35937.4	55488.6	30419.4	37322.4	51010.8
tr|M0Z9Q3|M0Z9Q3_HORVD	APEAATQVNTWVK	707.87	2	y6	12.2299	746.42	1	y	6	53984.5	40514.9	26917.6	35613.5	22053.8	63744.6	22965.4	15107.9	19883.1	44568.4	17022.6	33202.6	22881.1	26263.4	27135.3	26900.7	38855	18855.2	9748.31	10784.3	14489.7	19795.3	10902.3	8303.34	19460.7	30229.8	18319.2	15588.9	2975.67	6185.54	14296.2	16895.9	27899.6	15032.8	18255.2	24441.2
tr|M0Z9Q3|M0Z9Q3_HORVD	APEAATQVNTWVK	707.87	2	y11	12.2299	1246.64	1	y	11	55389.4	39616.1	29294.7	36167.7	20367.4	61606.5	20373.2	13624.2	21531.5	47481.5	18275.5	36220.2	23962.5	26944.4	30114.6	26496.4	37193.8	18988.1	14133.6	10903.3	15689	20459	10524.8	9398.75	19032.8	26511.3	14733.6	10014.5	2155.83	6341.09	13527.6	19510.7	25005.6	14579.7	19879	24963.6
tr|M0Z9Q3|M0Z9Q3_HORVD	APEAATQVNTWVK	707.87	2	y7	12.2299	874.478	1	y	7	49264.5	34858.5	23685.3	27136.4	22462.1	50550.5	16111.6	11498.4	18947	39198.8	13101.6	29379.9	17508.9	24409.7	24244.2	22576.1	31246	13441.9	8730.57	9373.25	14459.6	14871.2	8431.69	6598.4	14355	25747.1	13829.5	10836.8	3550.8	6008.37	15451.2	14191.4	21716.9	13959.7	14537.8	21336.7
tr|M0Z9Q3|M0Z9Q3_HORVD	QFSMYILLPEAHDGLSSLAQK	783.403	3	y13	25.0795	1352.68	1	y	13	104157	90580.9	64919.5	93612.8	56386.3	122252	58801.2	45095.1	61812.1	92417.2	43268.4	92419.3	66771.2	66550	66333.4	64759.6	80663.4	48455.2	45852.1	34284.1	44567	58529.5	39064.3	29649.1	70454.4	76116.1	38414.7	22801.6	16897.1	10226.3	57199	63888.6	115207	54421	63871.2	78292.6
tr|M0Z9Q3|M0Z9Q3_HORVD	QFSMYILLPEAHDGLSSLAQK	783.403	3	y16	25.0795	846.47	2	y	16	33148.2	25343.3	18763.4	27329.3	16600.5	37609.4	16274.2	12107.3	14219.5	29787.8	11305.2	29317.2	19111.3	20703.2	18782.8	18431.4	22787.4	12290.3	11035.9	8245.18	11586.6	19637.3	10692.7	7171.63	20053.5	23655.5	15233	8310.27	4420.47	6412.68	16471.4	20872.6	39354.3	17103.6	17854	25063.7
tr|M0Z9Q3|M0Z9Q3_HORVD	QFSMYILLPEAHDGLSSLAQK	783.403	3	y17	25.0795	928.002	2	y	17	23790.7	20652.2	13226.2	20548	11234.8	29324.9	12391.7	9304.75	10680.5	18343.9	8940.08	20169.5	13897	15251.7	14194.7	13751.4	20191.3	11734.6	9279.85	6882.95	7768.26	11484.2	7292.77	5337.24	14473.6	20940.3	10827.7	6489.14	4031.65	3266.64	11876.5	12436.1	28015	10830.7	14200.4	16992.8
tr|M0Z9Q3|M0Z9Q3_HORVD	QFSMYILLPEAHDGLSSLAQK	783.403	3	y10	25.0795	1055.55	1	y	10	31841.2	22954.1	18033.1	22643.8	15421.5	37055.3	14564.9	12155.4	12632.8	22387.3	8122.32	25255.9	16873.9	18305.1	17392.8	15546.8	20693.6	11063.7	9818.96	8060.5	10889.6	13344.4	8696.87	6480.8	19909	20476.7	11465.2	7136.26	4672.09	4323.21	14698.4	17511.5	34254	16387.7	19196.2	19954.6
tr|M0Z9Q3|M0Z9Q3_HORVD	QFSMYILLPEAHDGLSSLAQK	783.403	3	y19	25.0795	1037.04	2	y	19	20595.5	17606.8	12102	19059.9	10519	27358.6	10129.4	8105.71	9716.9	18951.1	8022.65	18437.8	11623.2	13032.2	12779.1	12285.9	18597.3	9058.52	8074.29	5706.94	6730.79	12325.8	6464.9	4953.18	14675.1	15382.4	7441.97	4705.75	3428.53	2906.93	11173.8	12168.9	26893	10225.6	12315.9	15695.3
tr|M0Z9Q3|M0Z9Q3_HORVD	QFSMYILLPEAHDGLSSLAQK	783.403	3	y9	25.0795	918.489	1	y	9	33408.3	28481.3	18753.2	25444.6	16702.6	39150.5	18670.5	12146.1	14662.6	33194	9849.16	29898.3	19735.7	20482	17198.5	17866.9	27552.9	13092.6	10154.1	13969.7	15286.2	21369.9	11099.5	8349.33	22739.9	28076.2	13466.9	11546.3	11079	7219.85	18323.6	20709.2	40295.3	16273.8	16938.7	23460
tr|M0Z9Q3|M0Z9Q3_HORVD	GIWTNKFDESK	662.83	2	y8	10.7197	968.468	1	y	8	32594.4	22076	23347.2	17402.3	12636.7	39409.8	12841.6	8215.08	12774.8	36618.6	9232.52	21944.9	14867.7	21261.8	20614.3	18301.7	28136.8	10249.6	9118.88	1086.85	9710.87	9866.96	7097.88	4524.61	14458.8	20684	8122.69	7415.14	2351.52	2564.95	14090.3	14840	17243.7	10841.3	20484.8	20541.6
tr|M0Z9Q3|M0Z9Q3_HORVD	GIWTNKFDESK	662.83	2	y6	10.7197	753.378	1	y	6	17172.6	8959.07	6837.56	3332.73	3627.99	8700.54	4914.2	5479.34	3619.05	7845.22	3050.18	5053.55	5838.4	4305.69	5011.44	5783.14	0	2399.39	0	9761.67	2050.73	4043.2	2713.8	1423.91	0	6865.62	0	0	0	0	2504.04	5731.93	5650.18	3491.33	4607.22	5435.57
tr|M0Z9Q3|M0Z9Q3_HORVD	GIWTNKFDESK	662.83	2	y9	10.7197	1154.55	1	y	9	0	18145.3	19322.7	16730.4	8710.78	22689.3	8679.29	7800.25	10886	24555.6	7956.8	13661	13219.7	11439.9	12386.3	10609.8	16378.4	5270.75	6971.13	592.177	7015.55	0	6367.49	4586.08	6251.99	8535.18	3822.49	3804.2	969.777	275.432	6976.81	7745.44	11774.9	7780.41	8729.62	12549.7
tr|M0Z9Q3|M0Z9Q3_HORVD	GIWTNKFDESK	662.83	2	y7	10.7197	867.421	1	y	7	15803.2	9595.47	8962.62	9910.63	5767.4	15017.1	8751.85	6653.29	8338.99	15702.7	6499.25	10637	10298.6	7896.34	7842.84	9914.11	11452.7	5143.06	0	4056.51	5711.23	6768.5	4989.79	2673.4	8501.65	13221.3	11059.1	12100.9	7972.77	3498.36	5496.32	8899.44	11112.2	6719.33	6684.92	7985.88
tr|M0Z9Q3|M0Z9Q3_HORVD	GIWTNKFDESK	662.83	2	b9	10.7197	1091.52	1	b	9	10455.2	6194.99	4814.74	5088.65	3379.86	10205.8	2833.45	4060.07	2931.93	9724.95	2886.47	8363.32	4861.47	4412.18	4025.82	3836.33	10976.4	2624.84	3010.43	927.596	2605.96	3283.73	1472.02	0	2493.89	5843.79	1622.3	1185.29	968.999	0	2870.9	3971.62	5243.15	4307.59	4724.84	5689.9
tr|M0Z9Q3|M0Z9Q3_HORVD	GIWTNKFDESK	662.83	2	b8	10.7197	962.473	1	b	8	0	3743.09	3027.63	0	2146.29	7438.79	2503.46	1932.98	3843.1	7719.69	0	3500.8	1740.86	2662.12	3671.37	3934.3	5042.03	0	0	718.383	1356.61	3442.98	0	932.394	1586.55	3385.69	0	1738.38	711.676	1475.67	2523.81	4013.03	4514.86	1602.61	2226.4	3644.01
tr|M0Z9Q3|M0Z9Q3_HORVD	VTAGLIEEILPAGSIADTTR	676.372	3	y10	25.143	988.506	1	y	10	14996.6	7603.99	7492	1739.11	7850.72	11328.8	5084.13	1010.92	5601.98	8248.61	5650.56	5925.09	8606.85	6287.63	7658.36	9834.27	8174.47	5341.91	6674.74	348.022	3642.82	6179.44	3310.19	369.277	5827.32	2462.48	2438.72	3007.41	1688.88	1246.44	3791.44	5273.44	2312.99	3985.6	3946.09	1520.56
tr|M0Z9Q3|M0Z9Q3_HORVD	VTAGLIEEILPAGSIADTTR	676.372	3	y8	25.143	820.416	1	y	8	5393.8	822.131	3133.49	8070.28	3089.03	5422.51	3141.15	0	2312.31	4685.29	1487.25	3264.98	3778.23	3786.88	5407.19	4169.07	4884.52	2454.94	2954.62	2131.16	933.214	1531.08	2786.84	1371.51	3598.38	4325.96	6383.99	4440.67	4178.51	0	1461.96	1703.99	2576.19	3216.82	2212.45	1007.45
tr|M0Z9Q3|M0Z9Q3_HORVD	VTAGLIEEILPAGSIADTTR	676.372	3	b8	25.143	813.435	1	b	8	0	3055.4	4424.06	1703.48	5851.39	0	0	396.408	3359.81	0	0	0	0	0	0	3032.78	5050.01	2252.58	1072.28	478.819	2041.27	0	0	393.836	0	1703.16	5736.85	8940.61	18118.6	17237.5	1853.28	2915.09	0	0	3075.42	1196.65
tr|M0Z9Q3|M0Z9Q3_HORVD	VTAGLIEEILPAGSIADTTR	676.372	3	b9	25.143	926.519	1	b	9	11759.7	0	3996.8	1261.92	5476.63	0	3530.54	335.434	0	0	0	6322.98	3096.46	6087.89	4185.77	3291.47	7391.77	4895.52	3476.28	0	3554.14	0	1188.08	0	2755.87	1803.22	10420.2	9159.31	22126.1	18883.2	1810.12	0	9911.64	2425.08	0	465.756
tr|M0Z9Q3|M0Z9Q3_HORVD	VTAGLIEEILPAGSIADTTR	676.372	3	y9	25.143	891.453	1	y	9	3821.97	5359.06	561.784	771.68	1672.36	4262.01	1735.38	899.094	2240.18	2552.61	1474.95	2797.09	2714.05	2341.92	1890.27	2737.4	2427.83	1276	2066.63	1027.82	879.724	1419.61	1411.8	542.103	1334.92	3393.67	0	1603.42	0	787.923	934.786	2191.08	1073.09	1266.09	704.093	1458.47
tr|M0Z9Q3|M0Z9Q3_HORVD	VTAGLIEEILPAGSIADTTR	676.372	3	y11	25.143	1101.59	1	y	11	1117.76	1669.11	1862.03	0	0	2541.21	655.284	0	604.088	0	786.685	0	1669.38	732.479	728.541	1108.07	1165.9	0	166.637	111.629	354.8	158.438	148.808	0	1724.85	4319.71	462.666	0	0	0	325.867	841.076	1903.91	0	700.017	1122.73
tr|Q03651|Q03651_HORVU	YDVGHLIPEGFK	687.856	2	b7	17.7657	798.414	1	b	7	0	6837.97	0	0	11768	0	1487.38	0	0	0	0	0	5807.71	54398.1	4847.84	2404.77	0	2974.67	0	0	3647.8	0	4519.43	0	35145.5	42811.3	15821.2	16283.9	6820.52	9593.18	26466.5	25426.5	37334.1	27715.4	27284.5	32903.6
tr|Q03651|Q03651_HORVU	YDVGHLIPEGFK	687.856	2	y7	17.7657	803.466	1	y	7	7854.55	0	0	868.502	0	7509.6	2558.49	476.06	654.955	13976.7	1610.52	0	6266.3	9464.47	0	0	5961.35	732.327	0	657.531	924.651	0	591.342	0	31469.6	39158.7	17702	15363.5	7779.4	11793.3	21782.5	22056.1	30289.7	21815.2	25469.2	28749
tr|Q03651|Q03651_HORVU	YDVGHLIPEGFK	687.856	2	y9	17.7657	997.547	1	y	9	9456.45	3411.53	9397.03	2202.11	712.331	4720.16	2282.55	698.519	4240.1	13539.7	0	985.003	0	0	2621.93	1921.06	1283.13	0	2308.7	1291.14	0	951.395	933.76	521.764	19373.9	23496.4	11548.9	10543.8	4340.11	8063	11604.2	14872.9	17199.3	13192	12719.7	18496.6
tr|Q03651|Q03651_HORVU	YDVGHLIPEGFK	687.856	2	y8	17.7657	940.525	1	y	8	0	0	0	826.977	1070.05	4403.7	0	305.502	0	5701.1	1333.16	602.455	3249.64	3912.03	720.027	715.333	0	493.404	2886.3	114.261	126.844	227.491	767.396	575.626	10076.6	12431.1	7198.42	6976.54	2533.82	7243.81	8167.08	7326.02	12998.2	7874.73	8750.22	9702.21
tr|Q03651|Q03651_HORVU	YDVGHLIPEGFK	687.856	2	b9	17.7657	1024.51	1	b	9	1650.35	1239.87	2259.45	2935.12	616.687	0	1142.23	1530.46	0	0	1098.7	1447.32	0	12307.2	6096.5	2896.58	5224.46	685.093	0	1772.09	507.439	643.121	1689.89	0	4303.66	4715.76	1272.47	2393.5	660.508	2870.44	3623.04	2536.39	5043.9	2817.1	6904.17	2435.96
tr|Q03651|Q03651_HORVU	YDVGHLIPEGFK	687.856	2	b10	17.7657	1081.53	1	b	10	2147.26	1699.4	2242.17	632.151	1203.6	4218.2	0	1844.22	0	0	1413.62	303.788	1055.53	0	1287.71	0	0	400.399	746.527	0	0	2514.26	558.808	1149.04	5740.45	7691.1	2415.04	2501.42	1569.74	2729.35	3979.6	4574.32	5356.86	3322.88	3892.12	4735.6
tr|I6SW25|I6SW25_HORVU	LQIPYVHPSILQQLNPC[CAM]K	716.726	3	y8	25.5492	1000.52	1	y	8	22684.2	21560.7	14591.1	16525.1	1065.62	14974.6	14755.8	8072.46	7442.15	12799.4	1315.27	8417.24	10474.9	4404.96	10678.9	7821.13	5560.53	5867.31	4024.11	7050.88	5454.22	8301.8	3489.33	5315	15771.2	20214.3	9227.77	284.983	6478.61	251.732	12072	7269.36	14137.6	11556.9	1847.92	13998.7
tr|I6SW25|I6SW25_HORVU	LQIPYVHPSILQQLNPC[CAM]K	716.726	3	y11	25.5492	1297.69	1	y	11	17152.3	15670.5	12784.9	13533.9	16615.5	13316.5	7755.64	6454.73	9736.82	16169.9	11227.3	6808.43	9471.07	45080.2	7090.53	9865.23	42460.5	5580.74	28245.1	3291.54	5123.23	4899.74	24720.3	3649.19	20037	17511.4	7856.75	724.787	5748.44	828.527	10544.3	10973.6	13485	10328.5	6961.23	13580.5
tr|I6SW25|I6SW25_HORVU	LQIPYVHPSILQQLNPC[CAM]K	716.726	3	b13	25.5492	759.427	2	b	13	0	3362.03	0	3242.21	0	6852.44	0	3066.53	2042.55	2607.28	0	1093.82	0	0	3554.6	5862.45	2304.06	1088.05	752.29	1355.89	1877.56	1340.69	0	0	4456.28	8166.45	9350.57	5079.95	1197.38	6785.5	1531.47	0	1764.14	2452.97	831.596	2120.09
tr|I6SW25|I6SW25_HORVU	LQIPYVHPSILQQLNPC[CAM]K	716.726	3	y7	25.5492	887.44	1	y	7	17665.9	14368.2	12045.8	13240.7	2715.15	13055.4	10621.1	10879.6	11715.1	13010.1	2036.22	8762.69	9649.17	4529.89	7644.55	8414.38	5711.05	6617.09	5039.27	4970.88	5797.85	8424.78	2633.54	2586.62	15023.8	19192.6	8318.71	1038.23	2059.5	0	12486.9	14730.3	11425.7	10192	0	11138.9
tr|I6SW25|I6SW25_HORVU	LQIPYVHPSILQQLNPC[CAM]K	716.726	3	y13	25.5492	767.414	2	y	13	9398.48	10691.5	7561.41	0	1154.55	8312.1	4104.51	4331.03	0	0	364.282	0	7015.06	0	0	5605.42	0	0	1167.02	0	0	6176.23	0	2409.74	6493.57	0	6185.68	0	6327.67	1241.85	6290.72	6069.29	0	5116.22	4726.43	8180.71
tr|I6SW25|I6SW25_HORVU	LQIPYVHPSILQQLNPC[CAM]K	716.726	3	b17	25.5492	1001.53	2	b	17	12263.3	15420	6608.12	12352	2986.26	12874.8	5852.33	6447.79	9674.64	8620.7	3088.07	2931.4	6250.39	5511.35	6238.69	8337.88	7389.54	4517.92	4687.7	2907.76	2987.7	8949.68	3621.9	2021.82	9460.91	12378.1	6960.47	476.62	8840.41	550.83	9079.42	9543.26	7824.54	7570.72	0	8548.33
tr|I6SW25|I6SW25_HORVU	LQLQIPYVHPSILQQLNPC[CAM]K	797.107	3	y15	25.1269	897.472	2	y	15	104534	91200.7	104655	77500.2	52083.3	75886.8	65960.2	68526.2	79734.3	94587.9	67761.5	73488.3	91024.3	2294.66	87976.5	66566.1	82764.5	58367.1	78854.8	61738.3	671.094	63640.9	60600.8	700.101	65804.7	81047.2	65563	64104	29951.7	2215.23	55237.7	57208.5	49578.1	45922.1	47630.3	64040.4
tr|I6SW25|I6SW25_HORVU	LQLQIPYVHPSILQQLNPC[CAM]K	797.107	3	y18	25.1269	1074.59	2	y	18	13219.1	10996.6	8527.46	8322.7	5407.97	7850.83	7551.14	6923.98	7646.12	16248.9	3506.56	5984.95	9733.83	1544.31	6826.16	10139.4	9837.59	5641.64	6269.32	3785.45	777.885	4891.35	6113.85	473.397	15582.7	15693.4	7023.59	3651.3	3934.76	4633.53	8733.56	7844.77	12278.7	5992.03	7640.26	9173.46
tr|I6SW25|I6SW25_HORVU	LQLQIPYVHPSILQQLNPC[CAM]K	797.107	3	y16	25.1269	954.014	2	y	16	7348.31	5198.06	5330.13	3441.73	3022.38	4477.4	2955.17	2539.62	0	4483.58	2312.05	0	4698.48	0	0	3341.21	3340.22	2694.51	0	0	173.921	2892.87	2109.66	67.9678	5926.15	6770.91	2285.09	2767.53	1684.62	599.192	4388.08	4291.73	5534.81	3880.83	2942.64	4843.36
tr|I6SW25|I6SW25_HORVU	LQLQIPYVHPSILQQLNPC[CAM]K	797.107	3	y17	25.1269	1018.04	2	y	17	0	3180.05	0	0	0	2567.56	2517.38	0	2440.28	0	0	0	0	0	0	2398.69	2805.7	0	0	0	0	0	0	145.502	3800.61	3642.06	0	0	0	1703.51	3713.48	3388.47	3939.23	2651.9	0	2231.59
tr|I6SW25|I6SW25_HORVU	LQLQIPYVHPSILQQLNPC[CAM]K	797.107	3	y11	25.1269	1297.69	1	y	11	54536.1	46094.2	41619.6	36877.1	26276.8	39722.6	30263.1	25901.7	36053.5	46560.5	20846.2	28882.6	41308.1	7089.18	25704.2	39964.7	33770.1	22548.2	19716.7	11289.8	4303.48	22663.1	17946.4	424.85	49149.2	50534	26948	13150.3	18051.2	2571.19	38446.4	38216.5	51721.6	29083.4	31931.1	37198.6
tr|I6SW25|I6SW25_HORVU	LQLQIPYVHPSILQQLNPC[CAM]K	797.107	3	y12	25.1269	1434.75	1	y	12	15270.1	14424.2	11848	10980.2	6641.69	11664.3	9227.7	5512.27	9721.4	10924.1	6689.39	6896.11	10726.9	1391.74	7739.56	10310.4	9746.43	5803.92	5242.6	3868.45	1568.71	6810.02	5178.41	140.61	12860.1	16487.8	5576.63	5914.39	4891.52	1027.04	12406.4	9811.47	15646.8	8001.77	7563.92	12024.2
tr|I6SW25|I6SW25_HORVU	QTLLQLQIPYVHPSILQQLNPC[CAM]K	911.17	3	y18	27.4176	1074.59	2	y	18	1238.34	1108.19	0	7320.59	0	1830.84	4167.33	4511.59	5082.85	0	1487.39	2984.89	3068.81	0	545.589	4191.54	0	2326.89	4617.7	971.488	467.337	705.022	2298.02	240.562	6713.68	0	5878.68	3396.12	8710.52	4639.47	4523.09	5238	4873.7	4435.5	4931.05	5879.01
tr|I6SW25|I6SW25_HORVU	QTLLQLQIPYVHPSILQQLNPC[CAM]K	911.17	3	y11	27.4176	1297.69	1	y	11	0	4826.1	7634.26	2012.11	11277	6353.18	2952.32	3020.27	0	3373.7	2696	3796.85	6051.12	1672.07	641.999	2286.26	6932.09	0	760.846	0	386.085	2635.32	894.105	131.976	13132.7	9069.33	999.546	0	2627.62	1292.44	9496.76	7460.28	6200.76	5708.51	7282.57	6377.73
tr|I6SW25|I6SW25_HORVU	QTLLQLQIPYVHPSILQQLNPC[CAM]K	911.17	3	y19	27.4176	1138.61	2	y	19	3379.46	2980.88	1604.36	0	1804.2	2687.92	0	0	380.401	1389.87	1123.74	334.558	1283.36	1787.08	4105.48	556.101	658.007	269.936	366.081	413.736	1484.99	942.813	0	806.832	1083.81	2169.9	2235.78	3937.92	1229.35	2204.93	2103.8	1663.59	3601.86	1918.2	1414.5	1518.91
tr|I6SW25|I6SW25_HORVU	QTLLQLQIPYVHPSILQQLNPC[CAM]K	911.17	3	y16	27.4176	954.014	2	y	16	0	192.808	499.98	639.324	466.71	0	155.232	0	0	82.5566	157.088	571.835	634.749	176.07	78.1393	170.121	830.16	53.2143	188.677	444.845	409.203	593.389	378.102	57.8367	5098.9	0	655.192	281.198	341.49	380.585	2041.93	1528.76	1862.31	1724.97	1874.19	2266.87
tr|I6SW25|I6SW25_HORVU	QTLLQLQIPYVHPSILQQLNPC[CAM]K	911.17	3	y15	27.4176	1793.94	1	y	15	417.949	1327.4	139.504	669.948	0	760.568	0	1871.31	689.336	115.091	159.971	1238.45	1285.04	105.965	106.521	0	0	215.982	0	393.7	143.465	91.6239	835.784	233.958	4173.9	3290.43	0	180.521	441.958	353.696	2935.82	3678.24	4669.03	2217.21	3202.6	2858.23
tr|I6SW25|I6SW25_HORVU	QTLLQLQIPYVHPSILQQLNPC[CAM]K	911.17	3	y17	27.4176	1018.04	2	y	17	847.989	0	669.458	577.96	0	0	638.017	714.763	411.39	0	0	528.603	255.862	550.581	201.53	0	219.27	234.009	379.082	420.198	463.538	446.136	126.722	235.556	1399.06	2056.01	1097.24	984.355	459.255	1187.89	1531.37	1544.82	2238.09	1730.39	1426.27	1978.65
tr|W5D7A8|W5D7A8_WHEAT	SIVPAISGGNSETAAFANAR	644.997	3	y8	16.781	821.426	1	y	8	26737.7	19908.9	24084.2	18345.5	11883.7	14993.9	29526.3	21232.1	36375.5	55880	20353.8	26919.4	16377.9	8150.91	11530	17824.8	16502	8211.53	22712.8	13674.1	13049.7	22107.8	13835.3	6564.43	8440.58	14023	23335.4	6940.06	1645.22	3258.13	29339.7	34308.8	31430.4	24108.3	30263.4	28872.8
tr|W5D7A8|W5D7A8_WHEAT	SIVPAISGGNSETAAFANAR	644.997	3	y7	16.781	720.379	1	y	7	17664.6	20354.8	19990.9	13353.9	10945.7	10846.1	20428.6	18299.1	26844.3	32989.3	18197.8	25441.2	17731.8	7173.67	8710.45	15133.2	13054.2	6619.23	20791.2	12332	13372.9	18399.6	11936.3	6567.94	11149.7	12851.5	3806.79	3471.32	1957.23	10961.9	23464.6	29641.9	27167	21705.9	22964.6	26431.3
tr|W5D7A8|W5D7A8_WHEAT	SIVPAISGGNSETAAFANAR	644.997	3	y17	16.781	817.4	2	y	17	24944.1	27091.6	22719.6	13162.9	10907.9	13268.4	24094.5	17518.7	25384.7	49716.4	18751.4	25178.4	17739.6	7772.33	7494.2	16057.3	15821.8	6415.29	21268	11432.5	13267.6	16346.2	11916.7	6260.34	1187.73	23636	18738.2	4713.08	2697.56	774.906	26716.7	33733.5	26964.8	19319.9	23869.7	30368
tr|W5D7A8|W5D7A8_WHEAT	SIVPAISGGNSETAAFANAR	644.997	3	y9	16.781	950.469	1	y	9	11007	8909.18	8594.36	6190.77	8868.36	8719.11	8091.69	7233.56	10407.5	10515.3	7659.01	9323.59	11780.8	5095.99	0	7964.76	7518.73	0	0	4660.48	3919.36	6141.12	7028.73	3314.54	1454.85	7355.88	3226.38	3094.13	0	2637.32	8487.71	11646.5	10186.6	7159.17	10373	10192.8
tr|W5D7A8|W5D7A8_WHEAT	SIVPAISGGNSETAAFANAR	644.997	3	y10	16.781	1037.5	1	y	10	0	0	1166.56	0	0	0	8695.43	8131.6	0	0	13380.2	6463.21	0	2932.76	1922.66	8803.77	2967.58	1982.63	4530.23	0	0	0	0	0	2570.11	0	0	0	0	2369.24	1838.96	13391.5	11020.1	1538.86	0	7137.25
tr|W5D7A8|W5D7A8_WHEAT	SIVPAISGGNSETAAFANAR	644.997	3	y16	16.781	768.874	2	y	16	0	0	0	3518.64	0	0	0	0	0	0	0	0	0	2061.99	0	0	769.445	0	0	1274.52	0	0	684.419	0	1638.93	0	0	3824.15	1986.65	0	0	0	0	1680.72	0	0
tr|W5D7A8|W5D7A8_WHEAT	SIVPAISGGNSETAAFANAR	966.992	2	y14	16.7857	1352.62	1	y	14	56382.8	44597.5	54202.9	31405	19659.6	25802.3	41110.7	33597.1	51856.1	95296.3	36592.6	43435.9	35557.4	14369.6	19880.7	31053.9	32010.4	9803.91	41673.3	19812.4	19302.7	35860.4	20320.8	9023.36	25797	25845.8	18143.8	9698.17	441.539	5378.94	45256	68146.6	54001.8	38498	58407	64757.8
tr|W5D7A8|W5D7A8_WHEAT	SIVPAISGGNSETAAFANAR	966.992	2	y17	16.7857	1633.79	1	y	17	25650.1	21211.1	25303.7	14364	10017.2	12937	20123.2	15285.3	25611.7	42001.4	16960.9	20105.3	19902.9	7541.82	9490.5	16150.5	16841	4947.72	21355.4	9142.25	11653.2	19236.6	9529.74	4750.82	11284.9	15672.8	6209.82	4269.94	250.895	2057.69	25867	34034.4	28836.3	19341.8	28804.2	31009.4
tr|W5D7A8|W5D7A8_WHEAT	SIVPAISGGNSETAAFANAR	966.992	2	y13	16.7857	1265.59	1	y	13	26231.5	25674.5	25265.4	17606.8	11446.5	16959.5	23801.4	18512.4	26268.5	45619	22995.7	21157.9	17879	9107.72	12105.7	16702.6	16474.3	5381.97	19639.7	9500.34	9469.53	15633.5	11232	4601.9	13046.2	13407.3	7764.04	5319.51	1815.92	2238.03	27094.4	31824.8	31866.7	20429.1	33407.1	32202.4
tr|W5D7A8|W5D7A8_WHEAT	SIVPAISGGNSETAAFANAR	966.992	2	y15	16.7857	1465.7	1	y	15	10436.4	10248	11167.4	6799.46	5185.79	5315.9	10445	8243.66	9880.02	17095.8	8842.98	9025.68	8345.81	3667.34	4206.98	5942.74	5964.89	2328.99	8689.52	4044.53	4082.67	7853.88	4293.44	2692.37	6295.78	6997.12	3387.51	2220.25	176.01	1768.34	9636.84	12309.9	12366.4	7132.76	10534.8	12583.1
tr|W5D7A8|W5D7A8_WHEAT	SIVPAISGGNSETAAFANAR	966.992	2	y10	16.7857	1037.5	1	y	10	6853.21	7522.8	8081.73	6637.63	2155.32	3230.97	7712.95	6106.21	10706.5	23840.7	6757.96	6348.12	5772.54	2523.3	4901.3	5297.14	4932.55	1865.82	7222.73	4429.58	3673.5	5824.18	2797.65	1212.22	4587.14	4902.67	2229.13	1813.52	648.386	0	8806.44	12386.7	10825.3	7894.98	13946.9	15035.6
tr|W5D7A8|W5D7A8_WHEAT	SIVPAISGGNSETAAFANAR	966.992	2	y12	16.7857	1208.57	1	y	12	11213.2	7606.47	10882.5	9225.99	4560.11	3888.06	8466.11	6480.94	8692.69	19256.6	5776.63	7286.48	7641.22	2879.91	3436.41	6401.61	5814.83	3030.62	8188.65	2753.65	3904.7	6949.06	4299.44	2147.84	4043.51	5403.12	4245.23	702.239	0	2029.24	9751.01	12401	10096.6	6332.96	12460.5	11969.7
tr|W5D7A8|W5D7A8_WHEAT	SNVFDPFADLWADPFDTFR	754.016	3	y6	34.3965	782.383	1	y	6	32538.2	31176.2	40646.1	18390.2	13526.8	17541.7	41522.5	37124	46554.6	81403.9	39649.1	43158.7	987.082	847.827	403.27	899.173	1207.32	327.7	725.886	317.576	0	770.174	788.017	741.58	14860.4	17188.9	7923.79	5331.5	2849.08	2203.37	43132	58744.1	48421.7	38376.5	43905.3	34551.5
tr|W5D7A8|W5D7A8_WHEAT	SNVFDPFADLWADPFDTFR	754.016	3	y7	34.3965	897.41	1	y	7	9929.73	8541.89	11221.7	5913.97	4842.08	5647.57	11537.4	10553.9	12149.5	25458.3	11698.3	15213.8	0	189.341	602.821	786.753	209.412	413.353	419.735	263.9	320.334	236.136	1250.88	497.551	3698.47	3801.18	2148.36	2130.96	797.733	932.28	11873.1	17412.4	11957.7	13652.5	10305.4	10984.3
tr|W5D7A8|W5D7A8_WHEAT	SNVFDPFADLWADPFDTFR	754.016	3	y8	34.3965	968.447	1	y	8	9211.39	9610.46	13631.5	6098.02	4960.77	5469.94	12393.7	11492.2	15816.7	26329.2	11535	14363.5	0	0	545.714	449.532	248.191	0	322.421	242.647	200.627	446.569	785.657	0	4465.4	5123.11	2185.61	2305.89	844.965	866.707	17050	21721.3	15196	13732	12424.2	11916.1
tr|W5D7A8|W5D7A8_WHEAT	SNVFDPFADLWADPFDTFR	754.016	3	y9	34.3965	1154.53	1	y	9	6107.83	5823.32	7484.1	2714.93	2331.83	3595.98	7609.27	5690.56	9073.93	12882.2	6555.93	6805.59	107.389	0	0	0	364.372	0	0	25.8866	117.889	407.347	530.505	266.476	2321.22	2854.6	1422.98	828.64	597.724	567.101	7156.31	11024.1	7479.5	6773.3	6277.15	5428.63
tr|W5D7A8|W5D7A8_WHEAT	SNVFDPFADLWADPFDTFR	754.016	3	b9	34.3965	993.431	1	b	9	3708.48	3957.7	3914.09	2737.13	1300.07	2033.36	6256.86	4186.74	4847.91	9192.33	3975.7	5643.08	0	220.17	0	592.478	406.781	84.5846	480.672	166.679	192.007	0	346.449	151.285	996.994	1722.85	1152.98	723.093	0	0	3828.74	6556.99	5108.84	4677.33	4726.55	3990.03
tr|W5D7A8|W5D7A8_WHEAT	SNVFDPFADLWADPFDTFR	754.016	3	b10	34.3965	1106.52	1	b	10	5114.38	4189.91	6154.37	3415.86	2425.48	2299.66	5718.67	4280.08	6691.76	8978.14	5569.75	5983.12	283.273	230.446	0	119.775	226.943	174.879	358.817	0	456.843	94.962	402.381	216.112	2016.5	2846.52	1425.61	653.712	702.497	469.86	6053.07	9491.69	8369.37	4989.77	6760.01	5398.69
tr|W5D7A8|W5D7A8_WHEAT	SNVFDPFADLWADPFDTFR	1130.52	2	y14	34.3862	1697.8	1	y	14	5850.99	4818.13	6064.34	2316.11	201.094	643.643	5289.52	3873.51	6696.26	11400.7	5158.89	6001.92	45.7177	305.287	23.0071	0	55.8133	342.658	101.947	38.0222	0	0	182.134	152.258	1645.4	2619.27	1245.09	783.885	482.585	535.048	5674.75	7438.35	7593.63	4775.77	5417.91	4038.98
tr|W5D7A8|W5D7A8_WHEAT	SNVFDPFADLWADPFDTFR	1130.52	2	y9	34.3862	1154.53	1	y	9	4196.24	2828.4	5232.95	2385.11	0	908.208	3802.69	3182.64	3768.83	9366.44	3490.7	4469.56	142.42	301.47	530.535	0	210.367	0	124.222	114.044	45.8687	109.175	367.881	381.136	1685.39	1952.26	456.746	1053.15	680.323	408.358	5410.84	5987.28	5438.51	3983.45	2917.61	4073.67
tr|W5D7A8|W5D7A8_WHEAT	SNVFDPFADLWADPFDTFR	1130.52	2	y10	34.3862	1267.61	1	y	10	4895.03	2949.88	4299.85	1721.81	129.804	627.976	3242.98	2240.35	3186.62	6086.26	2334.57	2717.09	161.074	290.992	249.317	574.157	0	303.147	37.9959	59.8466	19.7134	926.082	368.988	303.996	1132.02	1605.94	950.92	0	271.553	288.975	3617.38	4281.11	4162.83	3053.91	2563.56	2662.28
tr|W5D7A8|W5D7A8_WHEAT	SNVFDPFADLWADPFDTFR	1130.52	2	b13	34.3862	1478.66	1	b	13	0	211.18	0	0	644.067	0	0	0	0	0	0	0	0	300.096	87.7764	248.678	155.815	38.0216	75.9836	0	550.276	664.405	0	251.689	327.705	0	0	190.205	32.288	29.9261	452.256	334.314	0	275.598	392.653	0
tr|W5D7A8|W5D7A8_WHEAT	SNVFDPFADLWADPFDTFR	1130.52	2	y12	34.3862	1453.67	1	y	12	2563.22	1388.23	1820.7	974.951	367.366	245.151	1673.83	1722.66	1826.53	3188.97	2011.73	1705.6	0	430.907	0	184.805	110.907	0	313.734	25.8834	109.633	209.605	490.241	34.7893	901.818	437.54	678.077	0	397.516	0	2001.93	3678.43	2366.39	2166.54	1567.51	2319.45
tr|W5D7A8|W5D7A8_WHEAT	SNVFDPFADLWADPFDTFR	1130.52	2	y11	34.3862	1382.64	1	y	11	2776.68	3438.54	2836.42	1276.36	306.469	469.053	2063.79	2082.4	1645.08	5201.27	1982.01	2722.81	342.329	609.925	194.634	241.645	628.994	135.865	111.599	55.8139	1043.56	298.704	121.345	258.789	0	1863.62	1206.5	238.94	492.862	518.794	2656.73	3955.53	3258.11	2289.51	1853.37	2413.4
tr|E7BB46|E7BB46_HORVS	TLALPGQC[CAM]NLPTIHGGAYC[CAM]VFP	1193.59	2	y12	24.1598	1318.62	1	y	12	115842	85585.4	101222	85560.3	56198.4	88342.8	64357.5	39110.7	58376.8	149950	53775.9	52527.6	16298.2	10266	12884.8	14434.5	19514.8	7331.21	8380.53	7789.29	306.657	11263.1	8564.93	4414.99	61131.9	77035.3	1037.39	699.752	17446.6	678.94	71604.8	98754.7	116762	81597.6	108228	135195
tr|E7BB46|E7BB46_HORVS	TLALPGQC[CAM]NLPTIHGGAYC[CAM]VFP	1193.59	2	y15	24.1598	1705.78	1	y	15	0	0	0	0	0	0	0	0	0	0	0	0	0	3967.52	3412.79	0	4461.44	2251.45	0	1611.61	267.292	0	2785.09	1325.85	0	0	238.348	145.948	0	614.455	0	0	0	0	0	0
tr|E7BB46|E7BB46_HORVS	TLALPGQC[CAM]NLPTIHGGAYC[CAM]VFP	1193.59	2	y14	24.1598	1545.75	1	y	14	0	0	0	0	0	0	0	0	0	0	0	0	0	0	0	0	0	0	0	0	0	0	0	0	0	0	895.366	519.669	0	2412.74	0	0	0	0	0	0
tr|E7BB46|E7BB46_HORVS	TLALPGQC[CAM]NLPTIHGGAYC[CAM]VFP	1193.59	2	y18	24.1598	994.461	2	y	18	66520.6	45398.8	51938.1	43851.3	29587.5	51459.1	32691.7	22118.1	31386.5	81146.6	29734.7	28402.8	8456.74	5152.7	5623.2	11179.8	10091.1	4546.62	4825.9	5324.85	415.222	6367.5	4908.4	2580.65	32798.7	42620.7	620.769	0	8006.82	753.914	34676	50796.6	57867.8	44043.6	55241.6	66652.8
tr|E7BB46|E7BB46_HORVS	TLALPGQC[CAM]NLPTIHGGAYC[CAM]VFP	1193.59	2	b21	24.1598	1136.06	2	b	21	0	0	0	0	0	0	0	0	0	0	0	0	0	0	0	0	0	0	0	0	0	0	0	0	0	0	0	569.647	0	152.205	0	0	0	0	0	0
tr|E7BB46|E7BB46_HORVS	TLALPGQC[CAM]NLPTIHGGAYC[CAM]VFP	1193.59	2	b3	24.1598	286.176	1	b	3	723567	471283	582908	458098	315230	506801	321342	201689	294914	894831	313087	290049	83586.1	44169.4	53149.6	70753.5	82657.3	34436.8	45235.5	31211.7	0	55951.3	43476.1	17724.5	334761	544790	3835.35	1379.43	162958	6014.87	399471	551705	666190	462599	583928	703301
tr|E7BB46|E7BB46_HORVS	TLALPGQC[CAM]NLPTIHGGAYC[CAM]VF	1145.06	2	y11	23.6403	1221.57	1	y	11	114281	81556.8	91621.9	74285.3	50599.7	82698.5	37159	22496.7	30078	82683.8	29542.9	13781.3	20849.6	12485.8	15422.2	6875.65	8495.72	659.862	7748.55	1221.32	7350.9	10519.6	7125.3	8432.68	47524.3	69589.5	32290.6	21873.6	9735.69	14087.1	38716.2	51424.8	61349.8	42545.1	55575.4	71698.6
tr|E7BB46|E7BB46_HORVS	TLALPGQC[CAM]NLPTIHGGAYC[CAM]VF	1145.06	2	y14	23.6403	1608.73	1	y	14	19781.9	11616.3	13744.4	12876.3	7750.4	12670.3	6829.68	3380.3	5572.72	14105.1	4186.64	1936.93	3192.6	2355.43	2470.32	820.018	999.372	292.943	1019.9	838.047	1734.43	1356.64	2378.85	1268.83	8531.07	12183.4	6332.57	4149.94	2289.28	3054.27	5770.48	10331.7	12357.1	7161.33	10096.8	10304.3
tr|E7BB46|E7BB46_HORVS	TLALPGQC[CAM]NLPTIHGGAYC[CAM]VF	1145.06	2	y12	23.6403	1334.66	1	y	12	16218.4	15266.7	16161.9	13444	8962.02	15680.6	7571	3193.92	6490.33	16692.1	0	0	3432.02	2218.24	4377.98	3552.98	4061.53	2002.92	2347.05	0	877.291	4084.65	2984.27	5794.79	4636.83	12041	7522.1	4178.12	2066.01	2800.89	4081.27	6561.26	10123.1	6759.92	8132.52	11452.5
tr|E7BB46|E7BB46_HORVS	TLALPGQC[CAM]NLPTIHGGAYC[CAM]VF	1145.06	2	y13	23.6403	1448.7	1	y	13	10702.2	6498.95	6897.01	8369.38	5759.01	9033.01	4011.88	2297.69	3270.84	8528.26	2765.03	13910.8	0	1244.74	936.428	8121.49	9705.89	294.562	8760.63	3329.86	726.298	9595	11403.6	8193	5394.36	9593.62	3513.95	3023.8	2199.04	2396.35	3130.8	5490.21	6640.83	4256.24	5147.75	7883.43
tr|E7BB46|E7BB46_HORVS	TLALPGQC[CAM]NLPTIHGGAYC[CAM]VF	1145.06	2	b11	23.6403	1165.6	1	b	11	0	4322.91	0	4736.99	0	0	0	2126.63	2370.7	6116.7	2277.6	389.439	2869.22	1532.11	1986.47	0	700.965	0	0	1417.04	2044.19	1106.01	163.01	1564.81	0	0	2491.1	0	1066.03	0	0	0	0	0	0	0
tr|E7BB46|E7BB46_HORVS	TLALPGQC[CAM]NLPTIHGGAYC[CAM]VF	1145.06	2	b13	23.6403	1379.74	1	b	13	0	0	0	0	0	0	0	0	0	0	0	0	0	0	0	360.654	0	0	0	1038.07	0	0	418.254	0	0	0	0	591.72	0	855.833	0	0	0	0	0	0
tr|E7BB46|E7BB46_HORVS	TLALPGQC[CAM]NLPTIHGGAYC[CAM]	1021.99	2	y15	18.6074	1644.73	1	y	15	75282	57763.7	64183.8	54308.8	41281.6	53224.7	22347.1	11714.5	22671.3	46330.7	22984.9	16357.2	0	11466.7	254.959	522.544	19929.9	769.979	141.601	5133.68	623.827	8597.61	167.483	0	43690.8	47414.2	273.393	16376.6	7399.43	10433.1	24397.3	34660.9	39518	27766.3	36142.3	46360.5
tr|E7BB46|E7BB46_HORVS	TLALPGQC[CAM]NLPTIHGGAYC[CAM]	1021.99	2	y12	18.6074	1362.59	1	y	12	13591.9	9915.5	13894.1	10692.6	6173.61	10284.6	3697.2	2747.64	4906.41	11075.9	4422.83	2311.13	880.684	2519.79	4452.66	0	4687.05	1278.05	3187.86	0	316.959	2218.93	358.244	1499.17	7000.17	10754.1	391.406	3602.22	1635.99	2704.15	5288.34	7295.92	7347.57	4490.17	5586.09	8607.07
tr|E7BB46|E7BB46_HORVS	TLALPGQC[CAM]NLPTIHGGAYC[CAM]	1021.99	2	y14	18.6074	1547.67	1	y	14	10621.7	6572.54	7467.91	6522.12	3851.14	7948.81	2055.85	1954.42	3046.91	5251.81	2498.49	1871.03	436.624	2248.06	1441.52	908.623	3026.02	5535.2	374.735	1157.67	7457.6	1740.39	491.186	5103.54	3904.72	5824.69	69.6069	2049.26	1252.76	1567.91	3577.02	3921.19	4998.66	3802.93	3454.75	5756.9
tr|E7BB46|E7BB46_HORVS	TLALPGQC[CAM]NLPTIHGGAYC[CAM]	1021.99	2	b10	18.6074	1068.55	1	b	10	0	0	0	0	0	0	0	0	0	0	0	0	4013.71	0	0	0	0	8838.08	2985.82	0	9042.31	0	1769.71	7443.89	0	0	0	0	0	0	0	0	0	0	0	0
tr|E7BB46|E7BB46_HORVS	TLALPGQC[CAM]NLPTIHGGAYC[CAM]	1021.99	2	y10	18.6074	1088.52	1	y	10	22640.6	0	0	14157.3	5426.1	0	0	2641.36	4851.58	0	5501.49	2239.87	1462.87	0	0	3650.36	4800.47	999.078	1413.34	3091.03	2591.23	2298.6	255.829	2021.03	8867.87	9518.99	461.054	3414.96	1549.98	3150.26	3915.4	6023.55	7009.34	5142.4	6062.16	10427.1
tr|E7BB46|E7BB46_HORVS	TLALPGQC[CAM]NLPTIHGGAYC[CAM]	1021.99	2	y11	18.6074	1202.56	1	y	11	15509.1	16071.6	12917.6	14487.4	9035.81	16790.8	5130.84	6582.81	6175.01	12468.5	5081.41	6251.24	410.454	7810.28	689.941	672.037	7684.42	2017.66	0	3195.97	0	6072.93	964.182	584.415	6834.68	6866.96	868.698	2469.89	1110.9	2448.69	4704.1	5488.23	5501.78	5245.32	5711.12	6775.78
tr|E7BB46|E7BB46_HORVS	TLALPGQC[CAM]NLPTIHGGAYC[CAM]V	1071.53	2	y16	20.6371	1743.79	1	y	16	73924.3	48798.2	50004.9	51380	28424	47418.4	16807.4	10641.5	18418.8	38500.6	20815.3	998.222	0	5691.34	8845.83	16539.1	13540.9	4215.93	6641.75	1513.75	3468.48	117.322	4045.51	1366.25	28889.9	39731	0	16336.5	0	9886.26	20647.7	29621.7	31802.9	17701.4	23639.6	30883.5
tr|E7BB46|E7BB46_HORVS	TLALPGQC[CAM]NLPTIHGGAYC[CAM]V	1071.53	2	y11	20.6371	1187.59	1	y	11	16116.8	6701.83	10462.5	5267.54	2963.54	6891.48	3497.61	1637.09	2182.95	6814.28	2057.71	1088.2	2352.7	474.284	1938.89	1088.08	1493.8	0	809.968	339.777	565.595	426.806	700.963	271.915	5531.14	6411.61	1871.64	2878.33	2009.69	2597.52	2698.48	4559.39	3971.06	3301.12	3697.4	6014.46
tr|E7BB46|E7BB46_HORVS	TLALPGQC[CAM]NLPTIHGGAYC[CAM]V	1071.53	2	y15	20.6371	1646.74	1	y	15	9038.1	5912.39	7189.09	4807.35	4208.71	5954.77	2229.93	2041.82	2642.36	5937.98	2246.54	0	0	173.386	2135.03	2789.41	2071.84	203.76	971.179	287.691	0	667.049	407.83	353.43	3530.17	4877.51	1466.28	1950.14	145.284	2172.78	3159	4713.72	3249.67	2032.4	3093.72	4777.69
tr|E7BB46|E7BB46_HORVS	TLALPGQC[CAM]NLPTIHGGAYC[CAM]V	1071.53	2	y12	20.6371	1301.63	1	y	12	13612.7	16936.6	15655.4	13678.8	11894.7	0	8907.05	5008.91	5164.28	14270.9	4326.65	1215.03	1270.88	0	0	8016.94	14948	170.78	3580.48	401.482	3060.03	395.046	4668.27	2176.69	8804.69	14032.3	281.389	3807.25	763.031	3191.48	7862.96	8248.05	10822.3	7513.38	7511.02	10601.1
tr|E7BB46|E7BB46_HORVS	TLALPGQC[CAM]NLPTIHGGAYC[CAM]V	1071.53	2	y13	20.6371	1461.66	1	y	13	15610.4	10048.6	8446.58	9240.27	5450.07	8570.08	2941.35	0	6145.72	7201.16	3697.17	420.338	488.432	2819.43	1437.67	3827.67	3429.38	3629.79	826.361	0	742.276	2705.45	1469.95	625.698	8583.5	10080.9	612.326	2348.68	146.467	2403.68	3811.66	5483.91	6780.26	6514.87	6058.57	5589.18
tr|E7BB46|E7BB46_HORVS	TLALPGQC[CAM]NLPTIHGGAYC[CAM]V	1071.53	2	b17	20.6371	1701.87	1	b	17	0	0	0	0	0	0	0	0	0	0	0	0	1401.11	213.191	673.07	0	0	749.627	0	375.038	632.153	1095.9	349.607	0	0	0	0	1886.95	321.105	0	0	0	0	0	0	0
tr|E7BB46|E7BB46_HORVS	TLALPGQC[CAM]NLPTIH	767.906	2	y10	17.9965	1136.55	1	y	10	174752	148708	166146	211474	155988	197963	3368.12	43647.8	0	116311	81411.9	70534.4	90263.9	4393.73	18211.1	120265	93035.8	50248.4	48853	12655.2	22015.5	43201.8	34421.7	13609.3	82155.2	97544.4	61686.1	43914.9	16580.9	17264.2	50528.2	65826.5	80501.1	71284.6	78875	88879.3
tr|E7BB46|E7BB46_HORVS	TLALPGQC[CAM]NLPTIH	767.906	2	b10	17.9965	1068.55	1	b	10	0	0	0	0	0	0	5233.69	0	7002.99	0	0	0	0	6141.33	0	0	0	0	0	0	0	0	0	0	0	0	0	0	0	0	0	0	0	0	0	0
tr|E7BB46|E7BB46_HORVS	TLALPGQC[CAM]NLPTIH	767.906	2	y9	17.9965	1039.5	1	y	9	15654.8	18387.2	17649.9	22198.5	16509.6	23175.1	0	4621.92	1822.51	15993	7926.13	6707.53	11888.3	1115.84	5030.94	13222.1	13008.7	6391.67	7277.24	3299.95	0	5060.35	2352.54	0	13836.6	0	0	6496.03	0	0	4884.08	5410.7	7973.51	6966.64	8598.5	10225.8
tr|E7BB46|E7BB46_HORVS	TLALPGQC[CAM]NLPTIH	767.906	2	y11	17.9965	1249.64	1	y	11	0	0	0	0	0	0	481.103	2529.46	1865.84	0	0	3852.94	0	0	0	6331.85	0	0	0	0	1667.06	0	1815.18	722.486	4730.98	4426.92	3683.02	3032.53	778.161	2980.96	0	3149.09	0	4020.82	6689.67	0
tr|E7BB46|E7BB46_HORVS	TLALPGQC[CAM]NLPTIH	767.906	2	y7	17.9965	854.419	1	y	7	18184.3	17459.1	19269.4	23162.2	15718	25984.1	3064.16	0	7897.35	15703.4	12667.4	0	20060.3	1047.62	7067.12	11934.8	8939.86	5098.32	6364.03	2753.12	0	4005.54	1901.84	1797.31	13272.3	15637	9666.49	4924.23	3449.63	6494.28	0	0	7754.6	5447.6	6967.34	8797.14
tr|E7BB46|E7BB46_HORVS	TLALPGQC[CAM]NLPTIH	767.906	2	y12	17.9965	1320.67	1	y	12	0	0	0	10382.8	0	9810.17	0	0	747.218	0	3977.05	0	5198.51	0	809.443	6265.02	0	2949.66	3052.49	597.26	1529.97	1836.4	2821.98	1216.77	0	6421.09	3625.34	2875.43	1870.23	1634.9	2509.69	3703.3	5100.66	0	4477.46	4793.26
tr|E7BB46|E7BB46_HORVS	TLALPGQC[CAM]NLPT	642.834	2	y8	17.4056	886.409	1	y	8	30957.4	24736.5	26003.7	28633.9	19789.8	30277.9	9151.66	9481.83	12274	22195.7	10352.3	11331.8	14734.7	8910.94	0	14874	14153.8	9285.98	12059.6	0	5875.99	7975.55	6924.54	2045.24	12620.5	20752.9	12175.9	8597.71	1763.41	3954.29	16652	14034.9	18011	11912.6	14542.4	15948.6
tr|E7BB46|E7BB46_HORVS	TLALPGQC[CAM]NLPT	642.834	2	b9	17.4056	955.467	1	b	9	7128.89	4425.8	6609.49	7425.5	4075.88	4559.47	0	2832.63	1643.45	15460.5	0	2935.56	1500.64	287.225	1385.19	883.758	3624.3	988.882	283.549	47450.2	0	0	610.261	0	5187.49	6612.63	2149.91	0	38047.4	497.369	3133.2	4847.75	7263.52	0	4137.08	0
tr|E7BB46|E7BB46_HORVS	TLALPGQC[CAM]NLPT	642.834	2	b10	17.4056	1068.55	1	b	10	17360.3	11867.6	15060.6	15671.3	9491.6	15535.1	6034.04	4674.63	6819.6	16912	6534.25	6465.66	7683.65	3905.57	8426.23	10054.1	7038.1	7991.82	3582.91	0	2064.71	2978.55	7590.02	1114.9	5173.14	11147.3	5991.93	6274.19	0	2253.07	4320.77	7098.25	10374.7	7659.71	7831.12	6740.64
tr|E7BB46|E7BB46_HORVS	TLALPGQC[CAM]NLPT	642.834	2	b8	17.4056	841.424	1	b	8	0	0	0	2126.5	0	0	0	0	0	0	0	447.669	0	0	2437.36	0	1061.15	0	0	18830.7	0	0	0	0	0	0	0	0	37398.6	2104.36	0	0	0	0	0	1947.24
tr|E7BB46|E7BB46_HORVS	TLALPGQC[CAM]NLPT	642.834	2	b3	17.4056	286.176	1	b	3	27944.6	19146.9	27494.9	26242.9	16815.9	29763.3	10014.3	8847.9	10035.7	19777.7	12396.9	10686.2	13016.1	9046.41	0	18534.9	14139.5	5454.11	8181.3	18154.6	3468.36	5140.03	5847.59	2991.52	14126	17243.7	13025.6	14511.7	34677.6	0	7038.47	12998.2	14389.5	10308	13514.5	17056
tr|E7BB46|E7BB46_HORVS	TLALPGQC[CAM]NLPT	642.834	2	y2	17.4056	217.118	1	y	2	29732.9	25570.5	31515	31345.2	18843.1	38274.2	12905.5	9766.62	11966.4	27776.8	15777.7	14568.9	15411.5	9572.35	1129.13	18780.9	12782.3	7715.65	8571.61	0	5994.62	6626.83	6333.41	2428.58	13801.9	20179.8	16381.8	16762.4	0	1133.13	12186.3	14305.3	16601.1	16150.3	16465.3	25791.4
tr|F2CYL7|F2CYL7_HORVD	VILGPELAAGLGVPLKELR	649.066	3	y17	25.3413	867.02	2	y	17	6681.34	4504.07	78.0169	2030.64	2052.97	3249.65	2358.5	1807.13	1543.37	11605.7	2598.61	5463.44	25.0199	151.425	0	282.026	595.395	132.986	647.097	734.407	0	38.0379	84.2369	767.951	61497.9	70372.9	35612.9	14826	9826.95	6733.4	44384.8	46576.4	56371.8	31428.8	25901.5	33247.6
tr|F2CYL7|F2CYL7_HORVD	VILGPELAAGLGVPLKELR	649.066	3	y6	25.3413	755.477	1	y	6	6449.23	4479.96	175.534	3040.27	2572.36	2863.04	2067.58	1524.68	1922.11	12247.5	2273.66	4599.66	386.465	731.002	0	0	739.424	562.779	1107.85	630.151	0	128.158	54.2302	691.966	49908.1	61202.3	31557.7	14882.2	12736.9	8152.51	36800.4	36024.3	46726.7	26873.6	20325.3	26584.8
tr|F2CYL7|F2CYL7_HORVD	VILGPELAAGLGVPLKELR	649.066	3	y16	25.3413	810.478	2	y	16	4186.65	4175.39	0	3472.58	3260.49	3867.62	315.324	0	545.224	8214.28	4726.4	0	0	0	0	0	0	0	0	0	0	0	0	0	41517.5	50107.2	22238.5	16401.4	0	9061.07	34821.9	31439.6	34155.3	21249.1	15952	22311.3
tr|F2CYL7|F2CYL7_HORVD	VILGPELAAGLGVPLKELR	649.066	3	y10	25.3413	1081.67	1	y	10	4210.39	2236.67	90.1604	1144.32	1048.74	2383.85	1408.11	484.328	756.235	6914.89	1223.06	2755.71	29.9305	89.1498	23.8702	192.131	686.684	77.1301	276.6	536.178	254.669	114.168	150.247	0	28828.1	40078.4	19416.1	6153.48	6079.58	4462.03	23451.7	24351.9	28688.9	14724.4	13335.7	16752.7
tr|F2CYL7|F2CYL7_HORVD	VILGPELAAGLGVPLKELR	649.066	3	y11	25.3413	1152.71	1	y	11	3419.62	1959.47	484.971	1442.2	951.86	2066.21	1024.2	783.994	945.239	5942.34	1127.06	2073.27	0	0	132.086	0	29.9305	269.393	342.594	380.688	38.0767	0	76.1454	456.84	28702.4	35213.7	16455.2	6918.24	5108.66	5037.85	21179.7	20979.5	24920.2	13724.6	12667.1	14069.5
tr|F2CYL7|F2CYL7_HORVD	VILGPELAAGLGVPLKELR	649.066	3	y8	25.3413	911.567	1	y	8	4381.01	3495.19	308.926	2635.91	1308.48	2522.71	1189.59	781.922	995.778	6671.82	1598.79	3124.28	47.7441	47.7347	148.646	97.1009	495.481	218.922	510.081	0	132.703	0	0	396.08	34951.6	38880.2	20537.5	9828.61	6812.08	5381.74	28582.6	24192.7	31367.3	17018.6	13571.2	18866
tr|F2CYL7|F2CYL7_HORVD	TLFVPQYIDSNIVLFVQR	718.065	3	y6	29.5295	761.467	1	y	6	8801.41	7628.15	979.114	2849.52	2956.55	422.111	3470.5	8845.92	2534.86	16733	295.053	8725.84	1723.88	982.095	6685.05	1308.31	7273.78	1764.09	356.555	3331.02	0	170.175	471.373	557.847	102750	115616	54190.3	27520.7	22470.2	10624.2	89214.6	84457.7	97587.7	49222.7	42290	49260.4
tr|F2CYL7|F2CYL7_HORVD	TLFVPQYIDSNIVLFVQR	718.065	3	y14	29.5295	846.459	2	y	14	1252.83	0	3154.22	0	936.375	3547.53	0	0	329.03	3301.48	1016.54	1584.93	444.06	0	456.845	391.579	1007.82	305.508	2232.6	1149.53	1146.65	4457.96	418.753	0	18578.6	19172.2	7297.66	3018.38	0	0	14557.8	12664.4	15490.7	10356	6712.53	8859.51
tr|F2CYL7|F2CYL7_HORVD	TLFVPQYIDSNIVLFVQR	718.065	3	y7	29.5295	874.551	1	y	7	1303.59	1361.41	0	894.227	847.543	162.791	881.059	0	195.43	2877.02	0	1369.67	842.844	522.736	0	0	0	23.8602	86.1799	0	87.938	0	0	409.902	14114.4	19507.8	8074.5	4528.38	2780.07	776.674	11873.3	10824.6	14110.6	7457.89	6244.33	6778.44
tr|F2CYL7|F2CYL7_HORVD	TLFVPQYIDSNIVLFVQR	718.065	3	y10	29.5295	1190.65	1	y	10	2195.99	1387.41	181.866	0	593.343	359.587	0	942.88	54.6226	3147.33	153.95	2217.98	219.271	422.345	1532.25	332.273	1093.67	0	85.3201	790.858	174.185	179.733	175.113	84.8148	20087.7	23644.5	10126.9	4916.02	4067.49	2506.55	17652.9	15943.1	17768.1	10391.1	9094.06	9486.44
tr|F2CYL7|F2CYL7_HORVD	TLFVPQYIDSNIVLFVQR	718.065	3	y9	29.5295	1075.63	1	y	9	0	0	0	264.246	0	724.121	0	1116.4	122.092	2446.84	127.559	0	0	180.071	1157.44	284.885	1619.4	84.5674	908.567	237.466	0	1004.85	115.684	139.348	10488.4	16231.6	5542.93	0	0	0	11168.8	10470.4	9601.19	5345.44	5983.32	7192.95
tr|F2CYL7|F2CYL7_HORVD	TLFVPQYIDSNIVLFVQR	718.065	3	b12	29.5295	1391.72	1	b	12	554.569	770.89	329.778	148.569	0	131.907	378.987	0	0	1505.04	615.137	545.218	262.915	426.298	0	246.84	0	38.0066	143.994	122.123	55.8296	84.0123	519.551	0	6440.47	7288.76	2775.8	2554.19	1128.49	741.479	6657.08	5349.45	5822.31	3927.11	3243.18	3777.85
tr|F2CYL7|F2CYL7_HORVD	GGPFVFFGFTTSALR	802.417	2	y10	28.0819	1146.59	1	y	10	0	17009.1	5873.06	7393.68	5941.47	7832.87	5794.03	7280.37	598.367	29830.8	4359.91	479.577	1058.63	4241.59	776.893	1906.97	1519.27	0	0	0	853.413	280.339	508.658	696.921	125132	136975	62022.3	1196.23	22486	8885.3	95888.5	60704.7	97139.3	65329	45738.6	60362
tr|F2CYL7|F2CYL7_HORVD	GGPFVFFGFTTSALR	802.417	2	y8	28.0819	852.457	1	y	8	2161.08	6807.72	5504.94	2195.61	3936.28	6312.28	2710.46	1842.35	2288.02	14057.1	1242.59	2581.28	2240.01	510.854	2007.24	0	0	720.224	598.479	2557.34	182.588	760.119	578.024	141.76	65418.1	81526.2	41713.6	823.377	24740.7	2589.77	48753.7	33562.1	58654	31278.2	22675.4	33079.1
tr|F2CYL7|F2CYL7_HORVD	GGPFVFFGFTTSALR	802.417	2	y9	28.0819	999.526	1	y	9	2498.44	8105.03	2323.04	3265.79	4110.98	5324.59	3439.03	866.316	982.319	19292.3	989.996	2202.23	356.86	144.213	1482.77	0	445.112	0	303.441	0	227.632	594.737	0	0	67209.1	80467.5	39122.1	0	18596.1	0	52019.7	32996.2	55271.7	37402.3	20502.1	34077.9
tr|F2CYL7|F2CYL7_HORVD	GGPFVFFGFTTSALR	802.417	2	y11	28.0819	1245.66	1	y	11	835.469	2729.11	0	0	1532.52	1792.91	1081.15	1094.59	634.083	6779.34	0	678.711	502.856	0	0	611.191	7063.8	443.76	0	261.022	1244.38	0	510.554	270.552	34103.2	28428.3	14816.5	1672.23	7059	8822.45	19633.2	11204.9	27520	18192.7	8672.88	12453.4
tr|F2CYL7|F2CYL7_HORVD	GGPFVFFGFTTSALR	802.417	2	b9	28.0819	956.466	1	b	9	5194.95	896.246	0	0	797.466	555.767	456.606	524.335	406.528	0	0	319.559	0	3915.5	883.695	1323.57	367.272	645.103	468.058	581.149	608.327	0	1039.84	2428.87	0	0	0	697.845	0	0	0	0	0	0	0	0
tr|F2CYL7|F2CYL7_HORVD	GGPFVFFGFTTSALR	802.417	2	y12	28.0819	1392.73	1	y	12	1048.68	1004.72	918.169	154.329	649.822	1274.05	304.945	0	711.602	0	606.377	380.184	784.845	1401.82	0	423.587	0	131.863	180.645	500.657	77.61	280.072	437.274	140.088	0	0	6505.59	0	2144.02	1053.62	5243.44	3140.65	0	0	0	2638.28
tr|F2CYL7|F2CYL7_HORVD	NKPQFLVGPTSVLR	519.303	3	y7	16.6912	729.425	1	y	7	25453	21345.1	9351.02	8490.25	2850.95	14315.7	2969.98	4716.61	3432.77	43500.9	7752.52	17283.6	500.7	4638.84	22887.8	28870.3	32136.3	14107.8	16910.3	2166.55	2138.75	2797.33	1852.71	280.538	153071	198620	103431	41283.5	38303.7	27281.4	129634	94698.2	148272	81890.2	62462.1	91254.4
tr|F2CYL7|F2CYL7_HORVD	NKPQFLVGPTSVLR	519.303	3	y5	16.6912	575.351	1	y	5	8187.09	7509.29	4379.29	3014.86	0	4443.84	0	4051.02	0	14437.2	4099.87	7593.32	2499.1	0	0	0	0	0	0	0	536.985	0	0	290.745	58337.5	87044	61131.4	0	0	0	43768.6	34975.1	52603.3	31429.4	21540.3	28509.9
tr|F2CYL7|F2CYL7_HORVD	NKPQFLVGPTSVLR	519.303	3	y6	16.6912	672.404	1	y	6	16567.7	11318.6	5134.51	4839.97	6937.89	7213.27	6694.97	2807.28	4654.83	23291	4547.02	9794.84	514.497	6259.1	0	0	0	0	0	4827.08	1484.87	4206.58	3652.25	511.768	89997.4	112110	59670	25213	21136.7	17136.7	69878.1	50623.9	85157.4	46320.1	36290.4	50851.6
tr|F2CYL7|F2CYL7_HORVD	NKPQFLVGPTSVLR	519.303	3	b5	16.6912	615.325	1	b	5	17645.4	13354.1	7158.17	5545.99	815.749	10073.4	515.811	0	0	19357	6455.07	9072.53	0	0	0	0	0	0	0	551.758	1082.65	367.621	406.631	4292.71	61413.6	81002.6	48384.6	20177.1	18010.4	13530	50623.5	39889.8	67118.6	38241.3	26819.8	34899.5
tr|F2CYL7|F2CYL7_HORVD	NKPQFLVGPTSVLR	519.303	3	y8	16.6912	828.494	1	y	8	13939.9	12543.3	5230.82	4754.56	0	11120.8	368.023	2949.85	622.809	21806.7	4404.44	8801.73	701.887	0	13594.4	19318.4	19065.8	5625.72	8990.87	480.172	0	887.592	548.754	249.533	79420.1	107219	57489.8	32183.8	29803.2	20549.8	60208	48772.1	82072	43609.3	29793.9	43280.9
tr|F2CYL7|F2CYL7_HORVD	NKPQFLVGPTSVLR	519.303	3	b6	16.6912	728.409	1	b	6	0	7557.93	9704.82	0	8467.13	0	11834.3	2985.16	9208.54	24952.6	5276.47	9321.17	8098.81	12136.1	70189.1	88400.1	96028.1	42225.9	46046	6482.53	3539.8	9310.47	5637.7	1161.48	55239.4	73758.4	34995.5	21079.5	14236.1	12365.2	51481.4	46232.6	62355.4	35365.9	26209.9	37263.1
tr|F2CYL7|F2CYL7_HORVD	GVPGSGVPELPWQHGHGGWSAGC[CAM]GAC[CAM]R	694.067	4	y20	16.4494	740.659	3	y	20	603.152	1294.13	2374.37	1588.52	1404.33	1307.53	359.379	136.097	136.411	92.3114	873.905	1075.81	1790.83	356.064	1501.41	1334.66	1311.4	0	939.639	63.9391	0	1852.83	0	0	4970.11	5229.49	2745.78	76.1286	0	25.8721	3501.18	3873.32	5689.41	2502.41	2603.05	3860.03
tr|F2CYL7|F2CYL7_HORVD	GVPGSGVPELPWQHGHGGWSAGC[CAM]GAC[CAM]R	694.067	4	y20	16.4494	1110.48	2	y	20	8936.9	1370.9	3341.86	1524.88	4754.12	2355.42	0	926.113	795.417	1612.24	895.593	2433.09	4566.91	476.599	2857.44	1730.9	3568.14	829.749	1750.47	497.463	0	2345.51	750.174	1747.45	10254.6	10044.3	4420.09	0	1185.83	0	7599.04	7458.14	10946.1	5419.39	8618.95	9035.12
tr|F2CYL7|F2CYL7_HORVD	GVPGSGVPELPWQHGHGGWSAGC[CAM]GAC[CAM]R	694.067	4	y17	16.4494	940.894	2	y	17	361.232	4817.94	6819.65	3171.68	3238.44	3241.5	101.614	0	188.76	5228.47	4299.71	3310.82	5271.82	0	3769.53	6753.14	5324.35	2286.91	3424.47	0	330.187	3196.79	191.681	43.7078	14616.7	16244.4	7676.47	157.757	1774.31	114.155	12194.8	12906.1	15598.2	7748.83	9447.52	10346.1
tr|F2CYL7|F2CYL7_HORVD	GVPGSGVPELPWQHGHGGWSAGC[CAM]GAC[CAM]R	694.067	4	y7	16.4494	751.297	1	y	7	6961.62	5191.37	5756.21	7251.55	4706.89	2588.68	4202.14	501.593	620.994	0	1640.88	4156.31	5434.39	1237.61	5246.25	6699.41	4399.17	3048.03	2457.48	2209.79	1527.41	4582.98	2905.96	1232.41	13914.6	19250.6	9250.69	1488.14	3232.17	0	15005.6	13967.7	18442.5	10389.2	10446.2	13446
tr|F2CYL7|F2CYL7_HORVD	GVPGSGVPELPWQHGHGGWSAGC[CAM]GAC[CAM]R	694.067	4	y8	16.4494	838.329	1	y	8	4334.4	6273.82	9088.27	5165.78	4619.79	7608.33	0	1374.01	316.249	1754.99	6698.31	7674.11	7085.5	2461.76	3999.35	3188.66	5497.33	3725.06	0	971.715	497.312	0	1666.25	0	17640.1	15268.6	8189.68	544.775	2726.65	0	10281.1	14426	18389.5	6916.78	12812	13710.4
tr|F2CYL7|F2CYL7_HORVD	GVPGSGVPELPWQHGHGGWSAGC[CAM]GAC[CAM]R	694.067	4	y11	16.4494	1138.45	1	y	11	2175.1	0	0	0	0	0	418.923	0	1596.4	631.831	2157.66	4250.78	0	0	2450.27	8351.93	6022.54	0	4913.93	0	377.962	2995.7	0	909.889	9694.66	0	5438.09	233.944	1579.84	25.8771	11823.3	12202.1	13501.2	6474.2	6866.17	8481.33
tr|F2CYL7|F2CYL7_HORVD	LHIIC[CAM]SIDASDGAGFVPYQSFYLGGGGR	986.48	3	y12	23.9072	1301.63	1	y	12	1343.34	15211.8	10969.4	8867.73	10795.4	10130.7	7534.11	1417.65	786.087	17897.7	9379.86	15450.7	1476.4	2078.99	240.634	4593.6	1238.44	2957.23	2072.24	0	1640.58	359.204	260.001	3044.35	104578	108351	43438.3	24121	2682.38	1655.9	92020	99151.1	109324	52336	55013.5	60967.3
tr|F2CYL7|F2CYL7_HORVD	LHIIC[CAM]SIDASDGAGFVPYQSFYLGGGGR	986.48	3	b16	23.9072	1656.81	1	b	16	1141.76	1703.18	374.436	591.342	789.177	1430	1021.99	722.084	385.577	2730.81	1109.03	2287.62	275.045	0	447.858	710.475	0	154.411	0	769.227	685.842	366.162	0	491.518	10614.4	10187.9	6197.4	2286.46	611.629	0	8058.21	7985.68	8606.48	4457.72	4661.97	5197.51
tr|F2CYL7|F2CYL7_HORVD	LHIIC[CAM]SIDASDGAGFVPYQSFYLGGGGR	986.48	3	b14	23.9072	1410.67	1	b	14	3588.01	3328.24	2064.18	2968.77	0	0	2736.15	2254.54	968.123	4360.83	2126.78	2204.52	0	1740.79	0	1494.56	1044.78	1743.82	1553.53	1092.31	2457.17	976.749	345.013	1639.27	13714.3	13953.2	6757.63	4538.8	160.649	1334.76	12277.5	12075.9	11506.7	8450.37	5611.45	6896.02
tr|F2CYL7|F2CYL7_HORVD	LHIIC[CAM]SIDASDGAGFVPYQSFYLGGGGR	986.48	3	y11	23.9072	1204.57	1	y	11	0	0	6486.58	0	1688.13	3474.74	1340.97	0	2279.97	0	945.74	2436.13	4980.22	33513.3	1727.94	376.947	481.181	550.599	23601.3	0	1816.24	0	0	1134.7	10550.9	10678.9	3386.16	3157.92	930.169	17528.9	10535.1	9430.66	13572.9	8052.25	11821.9	8359.57
tr|F2CYL7|F2CYL7_HORVD	LHIIC[CAM]SIDASDGAGFVPYQSFYLGGGGR	986.48	3	y10	23.9072	1041.51	1	y	10	0	0	0	5867.23	1309.53	3210.61	2793.04	1191.82	0	4952.58	2974.23	7284.3	2025.8	0	1641.63	7516.58	4290.62	459.627	3277.84	0	1161.42	319.692	1431.91	721.708	14511.6	15809.5	7888.4	5174.76	1670.02	900.32	11691.4	16634.9	16012.5	7497.4	6601.93	11511.1
tr|F2CYL7|F2CYL7_HORVD	LHIIC[CAM]SIDASDGAGFVPYQSFYLGGGGR	986.48	3	b15	23.9072	1557.74	1	b	15	1098.11	0	0	0	332.534	306.009	0	170.64	0	1544.4	535.471	1298.24	1418.7	0	286.322	0	0	304.058	0	340.765	554.17	125.375	0	744.509	6047.46	7101.29	3963.58	1749.52	365.322	1772.66	5754.18	6695.28	8267.2	2791.76	3285.86	3947.89
tr|M0WX14|M0WX14_HORVD	EFYVAGESYAGHYVPELSQLVHR	663.578	4	y9	21.5368	1078.6	1	y	9	13954.8	10719.6	4865.53	4159.36	6986.9	10378.4	5413.61	3433.17	3126.39	33320.9	8426.65	19207.8	2004.04	1613.38	0	4179.61	1534.31	632.835	1036.43	1027.2	174.647	0	1453.78	1630.83	105926	110497	54232.2	34105.4	13020.4	17614.2	92655.2	101148	134282	78109.5	92689.2	92013.9
tr|M0WX14|M0WX14_HORVD	EFYVAGESYAGHYVPELSQLVHR	663.578	4	y12	21.5368	739.399	2	y	12	8704.07	6400.69	4156.57	3136.8	5880.45	6828.56	3325.83	2690.05	3344.61	18873.8	6912.51	13601.7	0	0	0	0	0	0	0	3312.25	0	2062.93	1594.03	1751.4	50418.7	55894.6	23088.6	10046.8	12044.7	4865.33	45306.9	50236.6	65135.6	39605.8	48825	61207.3
tr|M0WX14|M0WX14_HORVD	EFYVAGESYAGHYVPELSQLVHR	663.578	4	y19	21.5368	705.02	3	y	19	8052.04	6984.05	2383.37	2635.53	3345.92	5918.95	4038.25	3157.76	2137.66	18125.2	4711.68	12082.8	374.785	0	81.7231	400.171	252.417	304.502	701.256	622.65	116.255	526.059	899.117	1487.53	57114.8	62179.8	34282.4	19317.1	8314.53	6733.49	48616.7	48587.4	64400.4	39954.1	47066.5	49239.4
tr|M0WX14|M0WX14_HORVD	EFYVAGESYAGHYVPELSQLVHR	663.578	4	y7	21.5368	852.505	1	y	7	5209.76	3712.93	2801.17	1482.77	3220.89	3492.7	3841.98	1059.81	1496.67	9873.64	2407.12	5644.1	0	610.169	345.425	674.072	552.705	0	268.033	73.9601	729.374	1839.12	474.509	932.883	30904.2	36361.7	20359.9	13962.6	8812.05	8476.29	27508.4	31190.9	39667.2	22812.3	27271.3	28176.2
tr|M0WX14|M0WX14_HORVD	EFYVAGESYAGHYVPELSQLVHR	663.578	4	y10	21.5368	1177.67	1	y	10	2218.63	1922.08	1627.09	1256.6	1467.36	1794.44	2014.58	1096.66	1102.2	7259.74	1556.55	4193.68	351.549	257.5	111.977	458.609	237.698	104.528	134.397	77.6551	314.11	93.8635	251.276	208.406	20971.3	21643.3	13342.1	9357.46	4768.24	6841.65	18277.4	18125.3	26765.4	13935.7	18888.6	18631.2
tr|M0WX14|M0WX14_HORVD	EFYVAGESYAGHYVPELSQLVHR	663.578	4	y18	21.5368	681.341	3	y	18	5711.41	3576.12	0	2082.72	2290.93	4988.76	3234.22	4393.57	1516.22	12187.9	3753.02	8317.42	0	0	0	0	0	437.867	0	738.774	0	581.845	1155.8	1900.67	39781.2	47914.2	32018.2	14765.6	9463.75	8383.69	35106.7	38613.2	48543.8	29718	33853.2	32777.6
tr|M0WX14|M0WX14_HORVD	IWVFSGDTDAVVPLTATR	974.512	2	y15	24.1927	1549.79	1	y	15	11292.5	8055.42	5126.05	4661.04	5763.4	471.665	7152.03	3875.91	3089.87	27296.7	6323.85	17442.4	226.464	1351.27	530.898	630.835	591.002	1060.35	127.552	882.641	141.616	670.88	682.512	986.161	58798.9	66915.5	33690.4	16569.3	9389.93	10525.8	54092.1	62293.8	86731.1	41674	58380.6	68471.9
tr|M0WX14|M0WX14_HORVD	IWVFSGDTDAVVPLTATR	974.512	2	b12	24.1927	1290.64	1	b	12	3259.12	3327.36	1556.18	1052.22	1606.44	969.62	1677.19	1035.5	1675.03	6929.59	1737.13	4033.27	2804.17	880.968	1775.47	2299.01	546.115	593.127	862.068	0	619.141	1500.46	199.274	865.543	12712.2	18428.1	8866.52	4382.19	2311.53	3478.78	10243	10741.8	14811.5	9617.42	12153.8	14849.7
tr|M0WX14|M0WX14_HORVD	IWVFSGDTDAVVPLTATR	974.512	2	y13	24.1927	1315.69	1	y	13	8013.58	10155.7	8661.16	5367.98	4043.75	0	4531.59	3373.45	4132.84	22113.9	4620.84	11927.7	3728.81	609.205	2925.3	487.199	4499.25	0	0	2150.8	0	0	242.108	1207.24	47828.4	48712.2	30712.2	13666.1	8551.19	11835.5	42630.6	44700.2	63624	34164	45221.1	59980
tr|M0WX14|M0WX14_HORVD	IWVFSGDTDAVVPLTATR	974.512	2	y14	24.1927	1402.72	1	y	14	13532.4	9024.4	3790.27	2970.61	4306.01	0	5987.62	3629.2	3292.14	26719	6737.28	15080.7	187.831	0	1736.43	396.977	2017.74	330.515	0	777.731	0	0	0	671.498	57322.9	67647.6	36337.2	15123.2	10405.7	13190.3	51513.1	62128.2	81468.3	42538.2	54726.3	71236
tr|M0WX14|M0WX14_HORVD	IWVFSGDTDAVVPLTATR	974.512	2	b11	24.1927	1191.57	1	b	11	2860.51	2548.48	2480.73	1023.82	2569.59	265.259	1614.56	2146.9	844.465	6193.05	1816.22	3104.38	564.224	247.482	306.205	1082.92	686.525	0	0	0	0	925.46	0	594.612	11034.1	13752.4	10410.6	3121.19	2973.64	4521.96	7912.73	12568.3	16533.3	12067.8	9840.68	12311.5
tr|M0WX14|M0WX14_HORVD	IWVFSGDTDAVVPLTATR	974.512	2	y11	24.1927	1143.64	1	y	11	6597.03	6825.06	3244.03	2581.52	3128.53	1321.76	2528.25	2618.64	2640.26	18047.3	4511.75	8510.9	475.895	552.884	0	0	0	1609.05	1132.51	465.435	132.576	347.334	481.857	0	32678.8	41966.4	27352.4	14614.4	6574.68	10085.9	32832.1	37017.5	49106.4	24896.7	33461.5	42183.3
tr|M0WX14|M0WX14_HORVD	GAGLVLNEYR	546.296	2	y5	12.0506	694.352	1	y	5	24541.6	18362.1	8328.72	7580.23	41148.3	25598.9	47917.2	39594.2	0	83841.8	0	99856.3	3649.08	724.838	1640.07	3726.93	0	934.839	2404.56	2139.13	439.19	0	1524.16	23008.5	224881	338684	210488	119259	23979.5	61171.2	236280	278960	391998	214853	235363	283399
tr|M0WX14|M0WX14_HORVD	GAGLVLNEYR	546.296	2	y6	12.0506	793.42	1	y	6	27641.1	20985	11277.1	9939.08	13848	34006.7	15663.6	13263.9	7276.17	88304.9	22916.1	56740.2	1719.2	5078.5	6612.55	2536.17	2376.27	3471.62	7451.96	0	271.568	3629.93	0	8423.23	191130	286613	169882	95820.2	18994.6	41669.3	197039	242093	327811	181041	208081	234457
tr|M0WX14|M0WX14_HORVD	GAGLVLNEYR	546.296	2	y4	12.0506	581.268	1	y	4	10899.8	8593.7	5781.13	3942.5	5184.08	10671.6	7913.78	3860.69	3311.98	40251.6	7700.19	22654.1	6590.78	0	0	6993.89	17148.1	0	0	0	594.059	0	5061.14	2387.13	82608.9	122998	78367.6	46197.2	11295.6	29408.4	82182.2	107008	143200	76553	81970.1	97804.1
tr|M0WX14|M0WX14_HORVD	GAGLVLNEYR	546.296	2	y8	12.0506	963.526	1	y	8	0	0	0	0	2838.13	5553.8	2295.67	0	1327.59	16620.5	3201.79	10406.5	0	0	0	0	0	194.148	0	920.883	0	0	0	1113.79	30258.7	44641.1	31710	17012.5	3085.15	8921.11	30880.9	36331	52693	28719.9	33130	36992
tr|M0WX14|M0WX14_HORVD	GAGLVLNEYR	546.296	2	y7	12.0506	906.504	1	y	7	1318.99	1266.97	665.082	819.302	0	1777.02	0	0	443.511	0	0	4009.09	1353	5722.03	6536.86	1607.93	972.125	329.407	4336.2	329.69	65.6637	6325.09	551.806	0	0	0	0	0	0	3806.63	0	0	18849.6	9232.12	0	0
tr|M0WX14|M0WX14_HORVD	GAGLVLNEYR	546.296	2	b8	12.0506	754.409	1	b	8	1468.37	0	0	0	0	0	6073.31	4550.84	0	0	0	6031.1	0	15735.7	19408	6005.1	2693.37	0	35676.2	0	2537.62	61805.6	1802.3	1271.25	0	0	0	0	0	0	0	0	0	0	0	0
tr|M0WX14|M0WX14_HORVD	TAHDSYAFLAAWFER	595.618	3	y6	24.823	779.383	1	y	6	28808.1	24811.6	9758.6	9028.06	11896	30298.3	14884.2	9456.58	5574.78	65102.2	15541.9	35772.9	1187.5	4171.75	5996.75	1654.16	1966.6	0	2084.56	1896.43	0	0	0	3190.76	184485	186870	116342	58051.1	40811.6	19568.6	153313	143914	215060	132014	132932	164869
tr|M0WX14|M0WX14_HORVD	TAHDSYAFLAAWFER	595.618	3	y5	24.823	708.346	1	y	5	22483.2	21312.1	8832.76	9577.35	14888.7	25791.1	12996.6	9075.74	6160.66	59544.5	16104	32020.1	439.395	0	174.558	0	0	3940.79	0	1788.44	763.997	626.235	6359.09	2365.09	157809	175400	102843	57741.6	36282.5	18275.2	139300	121045	181413	113656	119199	147577
tr|M0WX14|M0WX14_HORVD	TAHDSYAFLAAWFER	595.618	3	y10	24.823	637.322	2	y	10	15105	15174.1	7259.72	6191.45	7885.03	17428.9	10412.4	7094.57	4675.01	35927.4	9454.9	19927.8	0	309.584	534.082	0	1482.52	797.333	472.287	906.921	2232.13	1417.79	1729.53	1779.56	136896	170498	125815	85231.2	70601.6	47845	113154	93148.4	137707	84486.4	76098.7	90761
tr|M0WX14|M0WX14_HORVD	TAHDSYAFLAAWFER	595.618	3	b7	24.823	746.31	1	b	7	13082.3	11440.9	4036.28	6147.85	6797.32	13459.9	6461.54	6732.16	3108.94	30028.8	8553.31	20661.3	666.15	190.754	0	175.397	2111.52	424.901	103.942	1034.39	1473.78	211.368	204.788	1749.56	93678.4	104416	64209.9	31392.4	22760.6	13371.8	87842.3	70541.5	111499	65039.4	72965.5	87770.3
tr|M0WX14|M0WX14_HORVD	TAHDSYAFLAAWFER	595.618	3	b8	24.823	893.379	1	b	8	19748.5	17875.3	6632.55	7080	11445.8	20256.6	10678.6	7905.11	5248.11	46321.6	13022.9	28618.5	144.101	747.251	521.206	0	699.837	466.606	456.547	1102.89	657.668	568.813	114.276	1593.28	127207	136951	76582.8	39163.5	30280.5	15208.6	116091	104738	154307	99961.3	102052	118310
tr|M0WX14|M0WX14_HORVD	TAHDSYAFLAAWFER	595.618	3	y7	24.823	892.468	1	y	7	10900.8	11878.5	5727.71	5981.23	5225.92	9506.77	4995.27	4299.13	3481.84	22354.9	7384.47	10398.6	294.664	498.966	6455.12	2051.41	207.426	453.322	329.246	1266.38	510.194	562.788	265.315	2995.74	45672.8	43694.8	27139.5	16361.2	10460.9	9299.03	34857.2	34850.7	43451.8	31098.4	32091.4	39281.2
tr|M0WX14|M0WX14_HORVD	QALILFQQFLQGKPMPGR	691.387	3	y7	25.4661	742.403	1	y	7	2179.45	2506.27	353.435	675.681	1771.44	1342.02	919.534	796.863	411.156	4907.8	888.067	3171.3	0	0	394.735	2687.64	602.544	464.189	634.95	1704.48	405.371	451.924	1077.85	1040.7	16703.2	22287.5	12718	9064.22	10638	0	17551	17193.6	43649.2	17305.4	13278.8	16240.7
tr|M0WX14|M0WX14_HORVD	QALILFQQFLQGKPMPGR	691.387	3	y13	25.4661	767.403	2	y	13	3270.33	2397.77	0	564.267	1187.58	2088.23	1119.26	1528.47	1312.81	4806.3	980.225	3548.69	0	2785.59	350.983	2706.94	666.581	2120.41	509.355	3645.29	1572.45	996.096	915.028	2488.93	17837.9	18655.2	10639.9	8651.88	7934.71	1950.58	15798.5	14066.5	35826.7	14672	12858.3	15772.1
tr|M0WX14|M0WX14_HORVD	QALILFQQFLQGKPMPGR	691.387	3	y14	25.4661	823.945	2	y	14	1071.37	1240.41	0	230.469	197.499	1331.99	2210.72	309.695	540.52	4351.48	0	2729.34	360.013	349.821	153.417	0	358.165	275.35	0	349.223	228.611	227.314	1226.53	74.7448	17380.2	18585.9	11935.9	6295.76	7628.57	946.199	18168.6	16751.7	41567	16742.6	15574.8	19474.4
tr|M0WX14|M0WX14_HORVD	QALILFQQFLQGKPMPGR	691.387	3	y8	25.4661	870.461	1	y	8	0	1061.34	956.052	904.998	4175.09	2229.13	575.537	742.527	3625.45	3651.22	2818.88	4361.27	938.421	2840.52	1106.23	3835.59	2388.1	0	1031.25	1141.48	987.291	1551.81	0	1094.2	16303.5	13822.6	10710.6	4751.4	6839.88	2703.47	15117	15040.7	35696.1	13942.6	11965.3	14885
tr|M0WX14|M0WX14_HORVD	QALILFQQFLQGKPMPGR	691.387	3	y9	25.4661	983.545	1	y	9	0	1057.76	1804.2	190.408	842.151	595.181	0	336.028	298.724	3845.46	1284.68	2161.02	470.75	179.291	0	359.445	968.844	1280.15	763.811	560.773	405.827	592.15	0	253.873	10947.5	13697.1	6008.35	3648.96	5594.71	861.878	9255.79	9993.16	26190	7987.77	9117.86	10071.8
tr|M0WX14|M0WX14_HORVD	QALILFQQFLQGKPMPGR	691.387	3	y16	25.4661	937.029	2	y	16	755.659	0	351.822	0	162.323	537.476	0	0	231.383	1084.71	378.705	810.461	55.7976	499.249	0	643.124	526.204	207.986	131.923	0	190.471	33.6796	326.087	0	6341.71	6164.71	3285.65	1958.02	2456.64	0	6190.59	5003.35	13107.4	5514.74	4794.27	6838.44
tr|M0WX14|M0WX14_HORVD	YSIGALGLATTTSWYPWYDDLQEVGGWSQVYK	1218.92	3	b15	32.512	1585.79	1	b	15	1678.23	386.194	722.947	134.501	237.504	228.759	552.136	911.773	329.215	199.623	0	458.744	281.391	334.497	469.316	485.66	87.7165	851.301	0	211.955	98.9296	296.954	0	261.056	84.9395	68.4725	688.69	0	236.678	72.5225	0	178.451	921.359	1428.48	797.618	368.485
tr|M0WX14|M0WX14_HORVD	YSIGALGLATTTSWYPWYDDLQEVGGWSQVYK	1218.92	3	b14	32.512	1422.73	1	b	14	2131.43	1073.61	890.817	216.864	585.198	1113.75	125.176	399.677	815.266	358.98	710.032	146.67	582.32	74.0914	492.374	1326.16	530.185	201.512	142.164	992.762	101.167	237.458	0	301.144	622.648	609.899	935.421	549.244	284.796	0	760.876	426.87	1467.44	452.16	181.009	1137.25
tr|M0WX14|M0WX14_HORVD	YSIGALGLATTTSWYPWYDDLQEVGGWSQVYK	1218.92	3	y11	32.512	1280.63	1	y	11	1478.49	3053.25	4187.26	610.888	761.63	1587	1003.25	3250.86	1667.56	0	1070.11	2877.75	1076.91	1232.96	1139.79	1111.84	342.123	0	91.8329	350.415	323.279	134.15	101.419	521.037	2067.49	0	2602.62	103.532	1025.41	929.867	1372.36	0	5476.1	3520.19	4552.03	1242.38
tr|M0WX14|M0WX14_HORVD	YSIGALGLATTTSWYPWYDDLQEVGGWSQVYK	1218.92	3	b29	32.512	1623.76	2	b	29	965.663	0	91.5131	59.493	352.495	0	508.31	453.094	0	166.794	192.122	1621.11	148.082	115.345	69.5489	795.574	162.736	229.945	0	65.8811	38.0417	102.764	29.9033	228.388	0	291.965	1650.73	55.7994	246.615	809.632	0	592.58	793.973	3542.36	3180.75	961.937
tr|M0WX14|M0WX14_HORVD	YSIGALGLATTTSWYPWYDDLQEVGGWSQVYK	1218.92	3	b24	32.512	1366.15	2	b	24	127.868	257.365	380.456	0	0	0	76.0544	76.1399	64.8786	23.867	106.772	0	140.013	0	258.69	304.366	29.9449	80.5932	76.1537	0	38.0724	114.212	0	155.455	377.828	59.8466	0	15.0132	114.181	0	111.337	185	0	0	0	390.205
tr|M0WX14|M0WX14_HORVD	YSIGALGLATTTSWYPWYDDLQEVGGWSQVYK	1218.92	3	b23	32.512	1316.62	2	b	23	0	944.858	630.937	310.088	468.749	0	0	198.508	201.58	543.308	0	662.826	1141.86	543.183	719.572	149.633	0	311.877	0	0	189.783	0	55.7961	368.058	160.606	254.905	0	517.673	405.821	485.315	238.611	253.581	1619.42	468.308	611.167	685.777
tr|Q2XQF1|Q2XQF1_HORVD	QQQVPQSVFLQPHQIAQLEATASIALR	1001.21	3	y23	26.8361	1259.69	2	y	23	44869.1	41577.7	31659.6	24590	15187.1	28272.1	20508.3	20879.6	23376.2	38797	20991.3	17409.4	15818.9	9433.32	9872.55	14891.1	11349	10150.3	8692.24	226.321	6170.93	7616.34	7312.58	3117.53	27016.3	37848.5	18293.6	10117.7	9383.07	5778.83	24772.3	27384.5	24687.7	18701.9	21962.1	20403.2
tr|Q2XQF1|Q2XQF1_HORVD	QQQVPQSVFLQPHQIAQLEATASIALR	1001.21	3	y14	26.8361	1484.84	1	y	14	13002.8	10841.1	11319.8	7960.02	4258.48	8858.5	6068.92	6921.07	7830.45	12950.5	5484.35	6383.39	4583.34	2938.66	3089.29	3784.92	5097.58	2246.51	3076.72	108.272	1901.91	1822.43	1955.13	1131.16	8239.86	8556.69	5676.71	3057.75	3087.37	1229.05	7741.7	11575.2	11259.5	6352.51	6685.02	8222.84
tr|Q2XQF1|Q2XQF1_HORVD	QQQVPQSVFLQPHQIAQLEATASIALR	1001.21	3	y16	26.8361	1718.95	1	y	16	59165.7	50311.1	40949.9	31437.5	19220.4	36285	25950.4	19598.4	29516.5	52107.9	22973.3	20338.1	16145.4	10083.7	9384.42	16345.5	12201.4	8064.38	9400.48	238.14	7128.06	8122.96	6268.43	2916.52	34208.6	40716.1	21736.8	12384.7	12736.4	7619.13	29937.9	33799.7	35097.5	26569.8	23176.1	29141.3
tr|Q2XQF1|Q2XQF1_HORVD	QQQVPQSVFLQPHQIAQLEATASIALR	1001.21	3	y10	26.8361	1044.6	1	y	10	16987.2	13754.4	14955.1	12165.5	5411.09	8933.98	7984.12	5571.78	10145.3	17356.8	7421.42	5405.41	3734.77	2121.32	3746.27	5307.99	3588.76	1896.13	2789.08	150.546	1771.59	2530.97	3756.47	675.46	8874.3	19125	6631.83	0	4001.74	0	7467	10283.4	10914.5	7292.28	8207.48	7203.74
tr|Q2XQF1|Q2XQF1_HORVD	QQQVPQSVFLQPHQIAQLEATASIALR	1001.21	3	y19	26.8361	1054.09	2	y	19	7532.84	4668.27	4673.66	2649.31	1873.98	3728.66	3169.29	2032.62	2578.69	4671	3347.67	1551.89	1753.57	1122.48	1073.43	1343.95	1393.04	1541.43	894.073	103.965	573.398	833.889	499.124	280.048	3376.21	4585.38	1981.33	919.468	917.847	220.403	3128.59	3556.38	3818.95	1782.55	2552.13	3029.65
tr|Q2XQF1|Q2XQF1_HORVD	QQQVPQSVFLQPHQIAQLEATASIALR	1001.21	3	b25	26.8361	1357.72	2	b	25	10220.7	8046.09	10000.5	5502.13	5631.36	9773.33	3594.44	4141.22	5768.76	9807.14	5171.93	5851.2	2230.82	2098.36	1278.08	938.84	2189.51	1056.91	1078.83	1087.25	1093	1753.35	1816.32	0	0	3385.1	1089.98	0	0	1176.5	6930.17	4524.09	7468.37	3026.44	4847.05	4796.02
tr|Q2XQF1|Q2XQF1_HORVD	QQQVPQSVFLQPHQIAQLEATASIALR	751.161	4	y8	26.8327	802.478	1	y	8	67625.1	53022.1	50634.5	32387.5	28199.4	35983.2	29003.8	28807.3	37339.4	55696.7	28960.8	26464	20663.9	11480.1	12590.2	15138.3	18084.4	3114.19	10400.5	182.571	9459.8	600.349	8499.84	4073.51	42875	42502.2	23391.8	16623.3	12495.8	10052.7	36835.8	38755.2	36890.6	30021.8	33154.8	29783.8
tr|Q2XQF1|Q2XQF1_HORVD	QQQVPQSVFLQPHQIAQLEATASIALR	751.161	4	b8	26.8327	895.463	1	b	8	11346	12575	6894.6	7547.45	6129.57	6771.07	6389.24	6121.94	5684.47	8861.17	4336.61	4000.45	4137.56	1775.98	3799.01	3415.52	4083.83	1154	2832	1239.33	2746.26	1266.35	1599.93	0	5238.51	7847.9	4406.64	2603.09	2481.52	1546.96	5598.65	7059.37	8471.94	6686.69	5413.03	5581.86
tr|Q2XQF1|Q2XQF1_HORVD	QQQVPQSVFLQPHQIAQLEATASIALR	751.161	4	y10	26.8327	1044.6	1	y	10	15528.2	12124.5	8655.33	9654.54	5612.66	9253.66	7966.07	5961.09	8249.25	12326.5	7012.65	6998.6	6162.33	3418.87	2893.43	4722.89	4480.58	374.442	2964.17	373.412	1824.81	277.443	2485.56	1730.77	8451.56	12264.8	7368.82	4374.68	4561.6	1854.7	10097.5	9124.87	8432.25	7238.07	7427.39	7600.38
tr|Q2XQF1|Q2XQF1_HORVD	QQQVPQSVFLQPHQIAQLEATASIALR	751.161	4	y9	26.8327	931.521	1	y	9	28997.9	25683	23670.3	20826	13477.8	20725.9	14917.1	20145.8	17990.2	29292.5	17208.6	15376.3	11754.4	6800.58	8115.68	9058.35	8281.41	7372.63	4925.55	0	4217.81	4859.62	5445.14	1854.48	23978	25829.2	15473.9	8498.4	9188.21	4630.37	19012.6	22653.5	20666	17117.8	17551.4	18666.3
tr|Q2XQF1|Q2XQF1_HORVD	QQQVPQSVFLQPHQIAQLEATASIALR	751.161	4	b9	26.8327	1042.53	1	b	9	11086.7	4284.33	7259.54	1940.4	2737.53	2710.22	0	1651.52	3055.8	4210.39	7255.16	1546.79	2032.7	1466.86	1280.64	1700.51	1228.4	688.21	735.285	329.789	504.782	0	1447.54	0	3178.32	4983.36	2843.42	0	0	728.036	4406.04	2781.36	3199.71	2270.69	2354.13	2228.79
tr|Q2XQF1|Q2XQF1_HORVD	QQQVPQSVFLQPHQIAQLEATASIALR	751.161	4	y15	26.8327	811.455	2	y	15	0	2543.32	0	0	0	0	0	0	0	0	2089.63	0	1083.6	0	0	1593.36	2078.47	0	0	330.086	1720.49	391.08	687.071	174.81	0	0	2745.26	0	1339.72	417.533	0	0	0	0	2512.28	0
tr|Q2XQF1|Q2XQF1_HORVD	AIVYSIVLQEQPLQLVQGVSQPQQQSQQQQVGQC[CAM]SFQQPQPQQGQQQQVPQSVFLQPHQIAQLEATASIALR	1154.17	7	y23	31.0032	1259.69	2	y	23	10852	6304.82	897.123	3191.79	2029.81	4382.25	5643.36	1758.84	3632.08	9207.07	3449.35	3725.78	0	258.395	0	1970.36	0	304.888	437.041	236.486	1094.06	2044.15	162.456	545.019	3374.27	3386.36	4286.41	2018.39	1819.28	1690.07	2965.77	4695.28	5389.32	2497.22	4789.24	0
tr|Q2XQF1|Q2XQF1_HORVD	AIVYSIVLQEQPLQLVQGVSQPQQQSQQQQVGQC[CAM]SFQQPQPQQGQQQQVPQSVFLQPHQIAQLEATASIALR	1154.17	7	b23	31.0032	1260.2	2	b	23	8751.91	8632.89	434.162	4218.75	2149.93	5856.18	5462.72	3099.3	538.593	12296.9	5182.75	4738.67	1312.39	377.738	104.222	1458.28	1002.74	68.8973	0	0	34.3022	850.902	0	152.288	4744.34	5491.91	2701.62	515.164	0	290.849	5369.06	6024.75	7712.04	3396.9	4496.01	410.224
tr|Q2XQF1|Q2XQF1_HORVD	AIVYSIVLQEQPLQLVQGVSQPQQQSQQQQVGQC[CAM]SFQQPQPQQGQQQQVPQSVFLQPHQIAQLEATASIALR	1154.17	7	y16	31.0032	1718.95	1	y	16	13088	10509.4	741.092	6604.78	3427.99	8087.42	7505.62	3674.26	110.077	15500.4	6615.07	7850.8	3307.41	1478.08	56.6481	1456.78	2735.64	149.287	204.097	0	25.8591	1105.07	123.786	77.1869	6635.9	8292.58	5017.44	1006.48	2479.62	514.079	8155.13	8331.67	10768.4	4014.91	6965.36	115.705
tr|Q2XQF1|Q2XQF1_HORVD	AIVYSIVLQEQPLQLVQGVSQPQQQSQQQQVGQC[CAM]SFQQPQPQQGQQQQVPQSVFLQPHQIAQLEATASIALR	1154.17	7	y34	31.0032	1255.67	3	y	34	1423.52	0	2597.03	0	0	0	0	0	0	1283.24	0	0	0	479.033	0	927.527	0	574.897	771.788	439.404	0	1262.43	153.087	880.014	0	0	0	959.718	0	818.45	0	0	1703.95	270.066	0	321.936
tr|Q2XQF1|Q2XQF1_HORVD	AIVYSIVLQEQPLQLVQGVSQPQQQSQQQQVGQC[CAM]SFQQPQPQQGQQQQVPQSVFLQPHQIAQLEATASIALR	1154.17	7	y14	31.0032	1484.84	1	y	14	3651.59	2610.01	0	2409.66	1299.78	2723	2700.48	2048.33	232.833	5187.92	1945.35	2037.76	1167.1	650.644	0	397.386	1400.6	43.7106	252.522	152.18	97.2638	493.384	24.5058	152.073	1502.6	2248.01	1423.8	813.752	1139.06	721.121	2875.63	2423.13	2768.27	1071.49	2763.92	0
tr|Q2XQF1|Q2XQF1_HORVD	AIVYSIVLQEQPLQLVQGVSQPQQQSQQQQVGQC[CAM]SFQQPQPQQGQQQQVPQSVFLQPHQIAQLEATASIALR	1154.17	7	y32	31.0032	1180.63	3	y	32	912.087	1651.67	744.806	972.387	154.997	0	681.836	451.07	174.061	2057.66	940.265	621.423	322.272	1827.63	200.801	1016.74	638.213	1446	0	184.567	0	244.87	195.693	213.61	0	3185.37	1763.53	2441.78	1276.55	1923.85	748.778	1318.12	1139.41	0	349.368	0
tr|B5TWC9|B5TWC9_HORVD	DKTGSVLQQAGETVVNAVVGAK	724.394	3	b15	24.2441	757.396	2	b	15	43914.7	18483.2	19402.5	6271.42	30348.2	36297.9	29945	28115.2	32014.7	43470.4	44371.6	46959.1	17968	20953.4	22705.9	28994.7	28998.8	17908.1	29982	34224.3	46727.2	39505.9	16179	23616.1	21183.8	21304.8	10420.1	9074.94	7172.67	8075.04	32129.6	28726.6	31551.1	30485.9	45965	50910.4
tr|B5TWC9|B5TWC9_HORVD	DKTGSVLQQAGETVVNAVVGAK	724.394	3	y9	24.2441	856.525	1	y	9	29808.5	14191.4	11713.3	247.76	13236.6	17967.3	45529.3	37453.3	52015.5	48043.3	30110.4	41092.4	16765.7	25838.6	36941.3	31292	41677.7	17004	45457.8	41163.6	44703.1	51502.5	8195.21	20202.2	40160.9	41374.6	17800.8	13420.7	11397.9	14055.2	58354.7	55974	72051.5	35158.4	36511.4	44285.9
tr|B5TWC9|B5TWC9_HORVD	DKTGSVLQQAGETVVNAVVGAK	724.394	3	y10	24.2441	957.573	1	y	10	26789.2	13512	12869.6	477.234	14354.7	15371.4	40256.5	32633.1	43708.9	42964.2	28466.1	34399.2	18836.1	19959.5	31930.1	26220.2	36381.7	16384.7	39843.8	40902.9	41994.9	44446.6	8200.62	17161	30882.6	35630	22822.1	27657	44979.2	62335.3	51709.8	49246.6	66078.2	34664.7	37971	37690.4
tr|B5TWC9|B5TWC9_HORVD	DKTGSVLQQAGETVVNAVVGAK	724.394	3	y12	24.2441	1143.64	1	y	12	27969.9	13661.5	10697.6	393.093	14192.1	16648.8	49210.3	35614.7	47983.6	46616.3	28189.2	40406	14605.1	25241.5	33281.2	30904.1	39461.3	18524.9	39129.8	40465.9	45221.9	48617.6	7579.24	19600.5	36510.5	33117.8	18427.6	16608.4	11925.6	11686.9	55421.3	53733.7	65487.9	34920	37985.1	39900.3
tr|B5TWC9|B5TWC9_HORVD	DKTGSVLQQAGETVVNAVVGAK	724.394	3	b9	24.2441	957.5	1	b	9	78814.1	7668.88	5512.52	0	33294.3	61543.4	71427.6	52797.9	78318.8	80949.9	41041.9	64930	6771.42	73786.8	73322.6	72313	101817	54333.3	54122.4	47360.3	45666.3	69483.1	4315.4	26681.3	100118	161246	115584	114925	115257	128030	57112.5	75910.6	67715.7	53658.5	48166.2	49940.1
tr|B5TWC9|B5TWC9_HORVD	DKTGSVLQQAGETVVNAVVGAK	724.394	3	b8	24.2441	829.441	1	b	8	18361.5	0	323.167	2153.68	9992.07	14932.8	29097.1	26133.1	35939.5	35527.4	23412.4	27072	0	16644.5	24963.7	18754.9	25405	15868.5	28391.2	26519.5	26150.3	31635.1	0	13010.4	29775.3	31376	17292.7	20357.8	23466.8	30635.8	40308.6	38232.7	44912	25260.7	26405.8	27234.5
tr|B5TWC9|B5TWC9_HORVD	TGSVLQQAGETVVNAVVGAK	643.353	3	y8	24.9025	757.457	1	y	8	202400	218447	231444	137843	89533.6	122640	255010	193034	262925	296348	212301	217769	222671	120380	193304	187037	240045	95847.9	284451	252856	184273	254807	160946	99594.9	196671	159735	100431	5545.79	34623.1	5000.27	292358	196218	297983	136208	127269	176651
tr|B5TWC9|B5TWC9_HORVD	TGSVLQQAGETVVNAVVGAK	643.353	3	y7	24.9025	658.388	1	y	7	130715	131635	134344	78107.4	54627.4	74553	155043	120372	155482	184164	128377	133315	132401	73348.1	116070	108804	144954	56316	177538	155690	112844	149252	92830.7	55800.8	124601	99747.2	55397	3224.82	23285.3	795.89	190354	123892	188095	81783.6	85082.9	110639
tr|B5TWC9|B5TWC9_HORVD	TGSVLQQAGETVVNAVVGAK	643.353	3	y9	24.9025	856.525	1	y	9	41104.2	39540.7	45598.4	24946.8	15794.5	22932.8	51336.7	37711.8	52335.2	54711.9	39565.4	39756.2	43969	23541.5	38767.7	36881.8	49867.8	18283.7	60831.6	50209.6	34851.2	50762.5	29922.8	21003	37636.6	29178.3	19055.3	1696.59	5992.59	1191.77	63548.6	37294.7	62044.8	28495.2	25282.8	35065.8
tr|B5TWC9|B5TWC9_HORVD	TGSVLQQAGETVVNAVVGAK	643.353	3	y10	24.9025	957.573	1	y	10	31546.7	31349.5	33727.8	20665	12332.9	17905.6	39058.5	28462.1	36864.8	43681.6	32620.4	32922.1	33200.8	18807	30798.8	26979.6	37272.6	13412.5	45481.5	37984.1	28438.2	38672.6	23522.6	15738.2	28641.3	23070.9	11852.7	2176.83	5422.67	1726.97	44317.4	28291.6	44351.3	19050	17832.3	24678.9
tr|B5TWC9|B5TWC9_HORVD	TGSVLQQAGETVVNAVVGAK	643.353	3	b11	24.9025	1072.53	1	b	11	36176.2	34924.2	39564.9	20754.1	13655.8	17975.3	41371.6	28602.4	40141	47741.4	32490.8	36654.1	33171.4	18254	34706.6	29354.5	36602.8	14889.4	47929.5	42737.2	29747	39862.5	24623	15115.6	29522.1	25044.3	13226	0	4610.89	0	48143.9	32487.5	49954.1	19654.5	20413.6	27610.4
tr|B5TWC9|B5TWC9_HORVD	TGSVLQQAGETVVNAVVGAK	643.353	3	b15	24.9025	728.376	2	b	15	15531.4	19573.2	13991.4	12138.2	6392.54	13116	18155.2	13010.3	18153.1	22570.5	14266.5	15308.5	14074.8	7596.93	15756.6	14182	16457.2	6717.86	18950.1	17740.2	10941.7	18300.4	11457.3	5892.18	19036.9	13266.8	7881.93	0	3848.37	654.429	25470.4	17394.7	22519.7	11550.8	9141.3	13883.3
tr|B5TWC9|B5TWC9_HORVD	DAVANTLGMGGDNTSATK	861.902	2	y11	10.9204	1038.45	1	y	11	18515.1	23317.6	26395.8	17373.4	8343.41	14649.3	33083.1	20195.8	28633.4	33238.6	18819.9	39951.5	26560.3	17143.3	32321.6	28009.8	28948	9551.76	46445.1	23786.3	24746.3	33667	21855.2	9571.02	10411.7	12252.5	7913.15	2015.12	609.858	4558.4	22978.1	20618.2	74770.9	13531.8	20140.3	18986.3
tr|B5TWC9|B5TWC9_HORVD	DAVANTLGMGGDNTSATK	861.902	2	y12	10.9204	1151.54	1	y	12	7226.48	7202.36	4813.97	4155.7	2714.99	5382.62	9559.14	6088.48	8511.12	12331.7	7387.54	10246.6	9356.1	6653.69	9044.6	9220.29	9374.33	3968.64	13807.1	9545.21	6497.55	11975.2	5702.65	3358.54	3151.78	5910.59	2963.04	382.984	138.667	1605.62	6443.12	7745.34	22986.7	4174.28	6277.89	6077.48
tr|B5TWC9|B5TWC9_HORVD	DAVANTLGMGGDNTSATK	861.902	2	b15	10.9204	1404.61	1	b	15	4236.36	0	0	0	0	0	0	0	0	0	722.203	0	3732.01	0	0	2156.74	0	1724.03	0	0	0	0	0	0	0	0	0	2097.56	584.798	205.075	0	0	0	0	0	0
tr|B5TWC9|B5TWC9_HORVD	DAVANTLGMGGDNTSATK	861.902	2	y10	10.9204	981.431	1	y	10	5050.36	5330.6	5637.35	1990.43	1733.26	5353.28	7577.24	4001.03	5223.08	8415.97	3740.38	7200.73	6412.72	5532.98	5277.95	6394.98	6640.86	2445.25	9321.25	5558.68	5038.68	8213.3	5069.17	1953.99	3107.61	3215.93	2738.72	747.188	182.339	1347.73	5158.96	5489.34	15807.7	3353.83	4323.69	5310.53
tr|B5TWC9|B5TWC9_HORVD	DAVANTLGMGGDNTSATK	861.902	2	y13	10.9204	1252.58	1	y	13	4376.57	4364.9	4236.26	3386.05	1682.91	2644.66	6805.69	2486.88	5810.48	6975.24	3437.31	6832.58	5040.51	4376.39	5883.19	6109.8	5846.65	2040.06	10395.8	4250.15	4411.72	5583.16	4702.54	1809.67	1692.81	2696.16	1461.19	878.987	0	724.219	4071.65	4369.47	11700.8	2804.93	1883.44	3982.27
tr|B5TWC9|B5TWC9_HORVD	DAVANTLGMGGDNTSATK	861.902	2	y14	10.9204	1366.63	1	y	14	2566.47	4211.31	4759.2	2014.93	1498.01	2337.47	4904.36	3434.61	5366.46	7142.42	3610.08	6945.25	4276.4	2804.68	4625.95	7536.51	7121.08	2001.59	8455.54	4372.35	3221.74	5660.15	5032.75	1655.62	2388.25	2294.62	2242.86	454.742	25.8745	725.898	3258.96	4634.5	10964.6	1837.17	3288.73	3704.01
tr|B5TWC9|B5TWC9_HORVD	TGSVLQQAGETVVN	701.862	2	b12	13.9454	1171.6	1	b	12	8445.01	993.319	7201.4	5075.17	4146.39	5479.2	5688.05	3925.31	6761.1	7980.39	4855.07	1190.96	8491.77	5339.48	8045.39	9677.01	7234.71	0	9135.08	5771.81	2519.64	6305.36	3699.56	2324.72	0	5452.59	543.863	0	2190.4	30249.2	5900.39	0	7066.23	1760.28	6167.04	5497.26
tr|B5TWC9|B5TWC9_HORVD	TGSVLQQAGETVVN	701.862	2	b11	13.9454	1072.53	1	b	11	0	4046.75	3427.23	2393.01	7277.02	1955.56	5319.75	2425.42	4185.31	4009.33	4456.68	1272.55	5139.86	4446.79	5963.19	4699.6	3940	545.855	7613.94	4508.09	0	4666.71	3997.99	1462.56	0	3571.97	6098.53	2229.77	817.125	0	4195.94	3152.28	4248.36	969.939	1286.24	2259.75
tr|B5TWC9|B5TWC9_HORVD	TGSVLQQAGETVVN	701.862	2	b10	13.9454	971.479	1	b	10	1521.72	1088.63	2883.87	1993.77	4877.01	3163.35	4905.44	1596.71	2047.31	4985.77	2362.64	807.609	3896.66	838.13	3243.7	3461.35	2894.67	0	4483.18	2950.53	992.27	2197.62	1732.25	967.273	2011.92	2605.87	0	729.739	630.912	3146.28	3858.71	1490.66	3409.22	1506.87	1197.54	1630.73
tr|B5TWC9|B5TWC9_HORVD	TGSVLQQAGETVVN	701.862	2	b13	13.9454	1270.66	1	b	13	1525.94	241.144	1251.76	1250.76	80.0068	1449.4	1449.12	1213.98	1219.03	2038.5	982.223	3081.35	2202.82	0	2303.93	2758.27	2414.69	375.053	3387.62	1671.71	3914.23	3041.46	1037.7	1124.29	363.386	1112.64	497.288	388.303	779.491	0	1551.29	0	1953.09	2552.24	1267.33	1671.76
tr|B5TWC9|B5TWC9_HORVD	TGSVLQQAGETVVN	701.862	2	b9	13.9454	842.437	1	b	9	1506.81	0	1779.29	1208.95	236.337	2672.74	0	624.946	619.796	2899.5	1176.13	439.961	1592.95	723.116	827.979	849.938	989.803	4681.02	1948.4	649.546	1661.61	1072.05	455.994	550.267	1110.61	0	12468.6	1741.03	4742.74	18487.8	1060.05	6049.67	574.097	1039.49	0	0
tr|B5TWC9|B5TWC9_HORVD	TGSVLQQAGETVVN	701.862	2	b8	13.9454	785.415	1	b	8	1688.43	2920.46	1303.96	1465.52	10417.3	1132.31	5026.04	0	2711.74	3160.59	2597.5	2082.48	3115.17	3858.11	3416.3	6649.57	4621.19	1287.63	6951.37	2798.86	0	4980.98	2652.53	1179.19	1159.44	2385.89	3227.39	0	0	2050.07	3961.33	9476.34	3151.5	0	906.761	2121.19
tr|B5TWC9|B5TWC9_HORVD	AVAGKDKTGSVLQQAGETVVNAVVGAK	650.112	4	y8	27.4531	757.457	1	y	8	18233.5	54101.9	33011.8	27530.3	16453	17519.6	77088.7	14391.5	86661.1	23786.4	16051.5	13827.4	17622.1	62866	15363.3	15686.7	58204.2	32201	26901.1	35411.2	114317	98248	79835.4	33026	50426	77773.2	39986	22008	17093.4	32792.1	24927.7	152063	99942.3	102232	131832	19593.6
tr|B5TWC9|B5TWC9_HORVD	AVAGKDKTGSVLQQAGETVVNAVVGAK	650.112	4	y9	27.4531	856.525	1	y	9	5056.26	19395.7	12576.9	10235.5	5335.25	5697.51	23046.3	3727.87	29454.2	5452.36	5479.39	5029.54	4898.38	20227.9	4986.7	3239.08	17104.5	11095.4	7068.99	11907.3	41198.5	32891.8	28199.1	11140.7	13402.8	22519.2	13206.4	7985.67	3971.86	11360.6	6648.14	52414.6	34871.4	33623.7	43364.9	4194.02
tr|B5TWC9|B5TWC9_HORVD	AVAGKDKTGSVLQQAGETVVNAVVGAK	650.112	4	y12	27.4531	1143.64	1	y	12	5264.71	17324.6	11365.4	9815.74	5685.05	6438.52	26140.9	2344.42	29237.5	6417.96	4242.35	3556.62	6049.98	22290.5	4603.11	4169.67	20968.8	11628.6	6521.74	14416.6	39393.1	36305.2	28258.1	14114.2	17619.7	25524.6	12050	7738.72	4319.76	1733.38	4915.74	53455.3	37281.6	35421.6	46856.4	4643.1
tr|B5TWC9|B5TWC9_HORVD	AVAGKDKTGSVLQQAGETVVNAVVGAK	650.112	4	y10	27.4531	957.573	1	y	10	5402.68	21988.3	12806.5	10153	5113.32	4666.04	27787.9	3813.76	33263.4	6208.83	4979.67	4350.89	4170.65	21051.3	4383.67	4235.21	22684.6	11621.6	6742.99	13976.6	45323.6	36464	29825.5	11671	18598.6	28385.2	17028.8	6732.31	5134.95	2662.89	5726.04	56135.2	37319	36036.1	50222.6	3766.43
tr|B5TWC9|B5TWC9_HORVD	AVAGKDKTGSVLQQAGETVVNAVVGAK	650.112	4	y11	27.4531	1086.62	1	y	11	1709.97	4695.57	3195.33	2679.77	1342.79	1193.45	6699.04	1606.41	7224.74	2879.15	1449.53	1000.88	1710.31	4931.36	0	1233.14	4545.1	3240.25	1902.49	4286.99	12392.9	9301.65	8321.83	3225.8	4050.68	7158.52	3069.83	1853.07	1252.86	3541.17	1749.01	11227.3	8719.99	8909.2	11424	2237.35
tr|B5TWC9|B5TWC9_HORVD	AVAGKDKTGSVLQQAGETVVNAVVGAK	650.112	4	y13	27.4531	1214.67	1	y	13	2222.13	4934.56	2564.13	1861.33	1022.79	2053.94	6704.28	0	8928.48	1597.13	1836.85	1436.14	1960.31	5386.73	1759.28	1307.84	5727.11	2907.04	1423.16	3353.24	11716	9568.36	6354.46	3633.8	3402.57	6411.3	2766.29	2019.62	1989.68	0	1433.98	16155.9	11061.5	10196.9	12168.1	1251.93
tr|B5TWC9|B5TWC9_HORVD	TGSVLQQAGETVVNA	737.381	2	b9	15.0291	842.437	1	b	9	0	0	2863.25	0	0	0	1232.16	0	1161.33	2859.88	0	2592.14	1096.2	0	0	0	0	0	1737.05	3095.03	552.139	1439.83	0	0	1546.64	0	5937.56	968.989	1431.11	0	0	0	4267.99	11005.3	0	3431.73
tr|B5TWC9|B5TWC9_HORVD	TGSVLQQAGETVVNA	737.381	2	b13	15.0291	1270.66	1	b	13	0	6365.5	0	0	0	2179.28	0	0	125.621	5487.54	2833.61	0	0	947.145	4011.38	424.306	5331.57	1927.54	0	1110.79	302.834	3482.09	2953.53	773.028	989.002	7564.36	1437.98	1234.2	364.768	410.593	2113.17	293.228	0	633.575	0	3082.27
tr|B5TWC9|B5TWC9_HORVD	TGSVLQQAGETVVNA	737.381	2	b10	15.0291	971.479	1	b	10	2314.81	17955.7	3018.34	1331.41	582.595	7450.91	3080.93	1486.17	1935.06	41248.4	7972.48	939.277	2043.88	1736.69	8571.84	2426.22	9797.56	0	583.276	0	1245.7	6277.65	6365.92	4314.98	2291.28	10632.5	967.247	11415.7	8277.44	447.794	7162.41	3056.57	0	4604.08	655.191	11139
tr|B5TWC9|B5TWC9_HORVD	TGSVLQQAGETVVNA	737.381	2	b12	15.0291	1171.6	1	b	12	4746.1	1719.59	0	0	0	0	4360.26	3516.31	0	6713.03	2972.71	803.884	441.3	0	4432.03	439.577	3187.66	767.453	2015.29	1337.84	577.114	3639.75	2737.3	1019.42	4782.64	7160.59	2483.35	987.724	978.949	3092.18	3339.13	3530.49	0	1414.71	422.391	5834.83
tr|B5TWC9|B5TWC9_HORVD	TGSVLQQAGETVVNA	737.381	2	b11	15.0291	1072.53	1	b	11	437.76	6485.81	0	1312.06	465.146	3192.44	1370.72	670.332	283.498	10647.7	5222.19	1247.73	759.385	2364.61	3439.33	604.445	3454.25	2927.42	1893.5	707.915	775.247	2168.73	3071.13	0	0	2252.25	6433.56	1412.21	452.339	2049.32	2075.16	314.464	3847.97	2079.81	1708.53	4087.57
tr|B5TWC9|B5TWC9_HORVD	TGSVLQQAGETVVNA	737.381	2	b8	15.0291	785.415	1	b	8	1738.96	4021.41	8868.78	13983.5	10631.5	4537.91	0	0	5428.31	6485.83	1672.63	416.273	12638.2	0	4955.19	10625.3	5385.74	1662.32	3847.22	0	3998.16	4545.96	1504.32	1519.06	5908.83	1778.77	1473.08	1052.19	1652.7	6410.3	4325.99	3670.45	665.912	643.202	491.614	4345.81
tr|F2EBM4|F2EBM4_HORVD	SEAYSSVSNLLR	663.338	2	y8	15.6839	875.495	1	y	8	33652.2	30256	28596.7	13005.1	12527.8	21228.7	13369.9	12139.8	12151.7	54545.8	13875.4	22915.9	7184.67	5722.78	8277.13	0	6563.37	3765.65	4729.25	2406.48	3944.02	3773.01	4705.47	1034.87	153457	196756	100830	41849.1	13980.5	13539.9	128932	128861	170073	72501.9	70917.2	96199.8
tr|F2EBM4|F2EBM4_HORVD	SEAYSSVSNLLR	663.338	2	y7	15.6839	788.462	1	y	7	28429.3	30435.3	17877.3	0	11908.5	21918.6	8923.09	10530.9	9083.33	36232.5	13302.5	15714.8	0	10160.1	12272.6	7738.61	16242.9	0	25991.7	5199.46	0	4164.55	3252.25	401.184	74248.7	104538	73816	34520.3	13185.1	9250.33	61266	58450.3	79318.1	33648.7	34487.2	42312.6
tr|F2EBM4|F2EBM4_HORVD	SEAYSSVSNLLR	663.338	2	y9	15.6839	1038.56	1	y	9	27276.8	22221.6	14414.1	7548.68	6240.37	12504.6	10474.5	8049.08	9395.82	23063.3	11428.4	11573.9	7606.15	6454.11	7809.78	3510.13	6240.28	0	7597.64	1911.63	348.57	6795.2	2482.1	0	62964.6	86299.5	48703.4	20110.3	12690.2	16539.4	57299.4	51081.5	69269.7	32495.5	27996.6	40268.4
tr|F2EBM4|F2EBM4_HORVD	SEAYSSVSNLLR	663.338	2	y6	15.6839	701.43	1	y	6	7562.82	5986.52	5073.24	3530.85	2714.86	4425.9	3979.71	2310.63	2672.91	11060.1	3439.93	4731.76	1691.9	1712.26	1690.45	482.747	1543.76	1061.41	3063.17	922.727	639.562	1090.78	700.426	1200.05	34804.3	42120	25426.2	13748.1	7439.73	8970.06	28956.5	26623.8	38916.6	15856.2	15065.6	21079.7
tr|F2EBM4|F2EBM4_HORVD	SEAYSSVSNLLR	663.338	2	y10	15.6839	1109.59	1	y	10	12321.6	11486.2	7445.4	5714.81	6534.53	12467.1	6019.09	5255.77	4030.68	20567.8	6941.57	10143.9	4003.47	2993.5	3840.82	6943.75	7179.04	1823.77	3341.92	1649.98	430.657	3269.26	3391.06	223.975	59932.2	75709.2	37832.5	18067.8	8271.45	559.928	49358.3	48868.7	60517.8	26677.9	28472.1	32275.4
tr|F2EBM4|F2EBM4_HORVD	SEAYSSVSNLLR	663.338	2	b10	15.6839	1038.47	1	b	10	17060.5	10535.7	9165.45	0	5623.66	10403.5	5308.03	6479.94	0	15481.8	5228.46	8716.1	0	7228.66	5326.56	2976.07	9769.91	0	3712.63	355.803	1080.45	0	2733.44	0	16960.5	0	6855.52	5482.96	2779.89	17241.7	17982.6	14522	16344.6	10042.1	16051.7	15365.8
tr|F2EBM4|F2EBM4_HORVD	QGFGVSSGVVEAITSAK	818.931	2	y11	19.9064	1061.58	1	y	11	7547.01	3829.76	3097.4	0	2489.01	243.07	2642.52	0	1326.83	6229.26	348.245	2082.72	0	903.658	397.525	2950.72	1689.85	0	2308.2	617.669	508.9	724.279	0	228.721	34179.5	33861.7	13902.9	8379.23	0	8439.33	20073.3	19936.3	25748.6	6835.51	6975.77	11268.4
tr|F2EBM4|F2EBM4_HORVD	QGFGVSSGVVEAITSAK	818.931	2	y12	19.9064	1148.62	1	y	12	19522.8	13592.9	10944.1	0	5983.03	593.501	5644.72	95.9376	4514.3	17230	1250.77	7636.97	1467.8	694.51	0	6500.55	2316.01	506.382	4979.22	319.256	215.345	851.096	987.33	452.362	62115.7	56651.8	35925.4	14879.2	6795.32	11627.9	48539.6	35448.9	55009.9	25746	14576.9	21689.9
tr|F2EBM4|F2EBM4_HORVD	QGFGVSSGVVEAITSAK	818.931	2	y10	19.9064	974.552	1	y	10	6857.94	3718.9	3147.44	0	1310.07	1170.78	1483.17	0	1756	6240.16	1951.31	1746.67	889.948	0	922.375	1338.88	6356.02	1370.23	1165.41	1298.72	611.372	520.247	1054.67	512.606	20954.7	24207.6	12855.7	9943.15	0	0	16324.3	11138.3	19209.2	4834.96	4342.88	7021.94
tr|F2EBM4|F2EBM4_HORVD	QGFGVSSGVVEAITSAK	818.931	2	y14	19.9064	1304.71	1	y	14	4889.88	2305.19	1908.79	645.033	1176	564.668	1410.84	1103.56	992.511	3658.03	1086.1	1397.06	1244.26	1104.4	0	384.424	2682.48	305.415	522.744	69.5973	713.468	738.916	737.733	128.329	16430.7	15490.8	6955.95	4167.47	1166.52	2360.48	11853.1	10891.8	13408.1	5025.53	3738.63	5333.89
tr|F2EBM4|F2EBM4_HORVD	QGFGVSSGVVEAITSAK	818.931	2	y13	19.9064	1247.68	1	y	13	2483.88	0	0	1348.83	393.525	1005.16	0	4088.32	0	0	1511.09	0	920.398	1443.34	566.932	0	2657.55	5684.13	0	0	1152.02	0	824.693	0	6739.07	8183.24	6742.65	2055.94	3841.11	5697.48	5098.24	2056.59	5940.63	2462.88	0	3686.11
tr|F2EBM4|F2EBM4_HORVD	QGFGVSSGVVEAITSAK	818.931	2	y9	19.9064	917.53	1	y	9	0	0	0	3868.79	0	2765.45	0	789.542	0	0	530.413	0	0	548.287	1813.31	0	0	1746.23	0	119.38	0	815.169	586.048	460.947	7817.43	8957.9	3620.2	6646.88	652.455	0	3743.2	3650.52	4961.43	3829.57	0	0
tr|F2EBM4|F2EBM4_HORVD	VYAIFTSNAINC[CAM]DDPSHPK	717.005	3	y15	13.5689	851.878	2	y	15	2913.71	991.297	0	1360.84	1505.35	2196.9	991.741	317.165	0	2017.14	0	2547.22	1067.76	0	0	0	0	0	414.438	261.393	0	276.076	456.127	679.93	21243.5	25397	13263.2	6440.95	4924.44	0	17408.7	16220	22447.3	9880.67	0	9798.05
tr|F2EBM4|F2EBM4_HORVD	VYAIFTSNAINC[CAM]DDPSHPK	717.005	3	y17	13.5689	943.939	2	y	17	2455.88	0	1612.19	1898.31	1420.7	2757	756.834	336.378	351.297	0	3101.18	3281.71	1903.03	1243.38	0	0	2390.24	417.45	1510.21	208.993	145.008	0	462.543	626.622	23021.9	26826.5	13784.9	4353.71	0	1475.54	19510.1	15754.7	27453.2	11806.2	483.797	9585.75
tr|F2EBM4|F2EBM4_HORVD	VYAIFTSNAINC[CAM]DDPSHPK	717.005	3	y9	13.5689	1069.44	1	y	9	9087.44	5258.22	10657.5	6326.72	2962.75	2595.78	0	544.024	533.872	6143.22	5709.17	3729.19	2843.42	422.981	560.959	932.904	400.298	2500.61	201.597	2845.51	2808.32	1795.14	559.681	415.433	23525.8	25714.2	13010.2	6544.48	2522.39	3545.19	17013.5	16769.9	33652.5	9933.68	2018.45	14328.8
tr|F2EBM4|F2EBM4_HORVD	VYAIFTSNAINC[CAM]DDPSHPK	717.005	3	y14	13.5689	778.344	2	y	14	6482.28	5887.37	5830.61	5822.88	1649.74	1829.9	0	0	834.546	4497.48	0	0	6379.97	902.961	1559.39	852.453	1951.84	1386.87	1203.28	634.73	2460.65	4279.74	1719.72	1895.97	6593.71	11178.7	0	0	1869.83	1178.83	8554.55	7331.61	13562.8	5286.48	1224.04	3042.84
tr|F2EBM4|F2EBM4_HORVD	VYAIFTSNAINC[CAM]DDPSHPK	717.005	3	y10	13.5689	1182.52	1	y	10	5841.23	3999.04	3130.64	2622.8	1143.56	1331.6	646.833	0	0	4493.63	2775.36	3399.53	2738.88	728.734	404.951	500.844	891.566	1003.33	934.085	114.823	1006.34	579.604	0	320.315	10914.8	13342.1	7107.46	2941.88	1334.61	1026.48	10022.2	11181.2	18737.2	6342.36	1876.31	9560.28
tr|F2EBM4|F2EBM4_HORVD	VYAIFTSNAINC[CAM]DDPSHPK	717.005	3	y8	13.5689	955.394	1	y	8	9835.81	4689.65	6548.87	1507.15	1467.42	2167.4	590.735	725.811	1778.66	1031.22	0	2266.97	598.642	3931.64	4260.06	4091.74	1600.97	858.594	3814.75	1755.47	1547.18	2540	530.498	162.436	8326.45	8207.12	5546.02	2201.85	968.216	925.091	7915.58	10731.8	20339.3	5120.46	5917.08	4488.3
tr|F2EBM4|F2EBM4_HORVD	AC[CAM]ISC[CAM]AEELER	669.295	2	y8	9.55052	993.431	1	y	8	133483	85190.6	207935	92350.8	94856.8	91924.5	93314.8	58664	72653.3	91505.8	91793.3	60683.8	66533	56777.7	64750.9	86133.8	67764.6	43863.3	38657.6	29036	26787.1	25377.5	22033.9	21503.7	64627.3	92929.7	59343.7	42733.7	4996.71	18620.5	73006.4	81156	130569	43074.8	53608.5	59245.2
tr|F2EBM4|F2EBM4_HORVD	AC[CAM]ISC[CAM]AEELER	669.295	2	y9	9.55052	1106.51	1	y	9	73068.5	46615.5	101725	48475.1	45847.3	47759.1	50106.1	27834.2	37146.8	49393.8	47274.6	32936.2	35914.5	32358.6	28590.3	48389.6	35817.4	27071.7	22513	14715.6	13921.5	16175.9	14126.4	11172.2	30610.2	47074.1	34497.8	22413.2	2852.04	9378.9	38103.1	48939.1	66400.3	20811.8	26579.4	32147
tr|F2EBM4|F2EBM4_HORVD	AC[CAM]ISC[CAM]AEELER	669.295	2	y6	9.55052	746.368	1	y	6	38330.4	20679	41799.1	24762.9	22360.3	25002.5	22466.2	15555.6	21026.1	21377.4	25282.9	16565.7	21993.5	14642.4	16148.6	28375.8	23355.2	10766.8	23047.9	7079.79	5267.46	15943.9	10238.4	4223.48	10329	23723.3	19424.3	9157.25	2232.17	9364.28	13455.1	20443.6	28693	14709.2	14480.9	14455.7
tr|F2EBM4|F2EBM4_HORVD	AC[CAM]ISC[CAM]AEELER	669.295	2	y7	9.55052	906.399	1	y	7	34995.5	58044.8	87574.5	24750.3	24184	0	23568.7	15717.4	22148.3	28250.1	24693.9	16962.2	17973.4	18195.9	22201.7	25740.4	22744.7	0	0	6563.09	7702.92	14772.4	10916.6	5572.4	15169.6	41773.7	17594.6	15249.4	0	6433.86	25596.7	33359.2	42808.4	17548.9	22042.1	17566.6
tr|F2EBM4|F2EBM4_HORVD	AC[CAM]ISC[CAM]AEELER	669.295	2	y5	9.55052	675.331	1	y	5	16781.3	12304.1	29006.9	13110.8	9557.44	18707.5	11724.5	8283.99	13935.8	12356.8	13125.7	6348.75	8135.42	10521.7	7712.75	11290.9	15288.9	5137.5	0	3753.08	5601.77	4532.98	3286.61	3173.63	6085.45	12459.1	11637.8	3528.42	0	0	6315.17	10845.7	17848.1	4835.67	7791.96	8287.86
tr|F2EBM4|F2EBM4_HORVD	AC[CAM]ISC[CAM]AEELER	669.295	2	b3	9.55052	345.159	1	b	3	14499.8	11215.9	27322.5	11476.4	14261.9	12448	14106.5	6797.93	8523.7	12647.8	14645.3	8511.48	9379.2	7796.54	6526.93	10172.8	9874.11	7179.77	4736.86	3395.61	3141.25	4831.29	4590.27	3221.42	7370.56	17542.8	14710.4	6070.75	1637.48	10835.5	9050.21	14575.1	22865.3	5335.27	8865.27	9427.38
tr|F2EBM4|F2EBM4_HORVD	TFNFYSGEPDVK	702.328	2	y8	16.6438	894.42	1	y	8	25941	20537.4	21769.8	9505.08	8854.86	18944.2	14212.6	14607.3	16525.8	11877.7	9918.21	16669.3	904.794	2503.05	7430.68	7070.18	821.058	6274.06	2770.77	4688.56	1873.85	8532.7	5107.28	0	26197.2	29305.3	18261.7	6182.87	0	0	22510.3	23884.9	31819	12149.7	0	15257.2
tr|F2EBM4|F2EBM4_HORVD	TFNFYSGEPDVK	702.328	2	y7	16.6438	731.357	1	y	7	0	0	0	12058.6	7752.49	0	20004.6	17278.9	18323.2	14726	7342.96	12673.9	5785.34	5744.56	10916.1	0	0	3964.21	18095.8	6373.73	17273.6	5603.85	3808.3	5238.73	22878.9	55542	18952.9	14622.4	0	2616.44	21510.3	18981.7	0	9910.4	0	14092.4
tr|F2EBM4|F2EBM4_HORVD	TFNFYSGEPDVK	702.328	2	y10	16.6438	1155.53	1	y	10	19871	16135.9	15762.5	6439.37	6570.48	14005.6	10286.6	11107.9	13205	1527.1	7629.07	7825.53	0	0	5672.15	3912.14	592.725	3405.53	0	4722.49	0	5705.15	3317.49	320.508	16108.3	21262.9	11345.3	5159.79	218.852	877.632	18759.9	18562.8	23020	12445.8	2299.7	9894.88
tr|F2EBM4|F2EBM4_HORVD	TFNFYSGEPDVK	702.328	2	y9	16.6438	1041.49	1	y	9	8025.37	9988.58	10530.2	0	2699.26	5608.19	15133	9159.31	14024.6	1788.95	6964.56	13487.8	28685.4	21312.7	4685.93	4302.18	1626.78	3133.94	2670.11	5617.05	1725.98	3486.84	2305.07	935.513	9997.55	12488.1	6558.24	2279.38	674.337	920.828	8721.69	8965.57	17482.6	4867.17	977.808	7108.91
tr|F2EBM4|F2EBM4_HORVD	TFNFYSGEPDVK	702.328	2	b6	16.6438	760.33	1	b	6	0	0	0	0	1101.01	0	0	0	0	0	0	0	27438.1	27071.8	0	1908.72	3647.14	0	3777.24	0	1720.13	0	0	0	0	0	0	0	121.046	0	0	0	0	0	344.174	0
tr|F2EBM4|F2EBM4_HORVD	TFNFYSGEPDVK	702.328	2	b8	16.6438	946.394	1	b	8	0	0	0	0	0	825.538	0	0	0	5396.02	423.356	0	0	0	0	0	1457.97	0	0	0	0	0	0	0	0	3203.08	0	0	1197.95	719.914	0	0	2824.47	0	3770.31	0
tr|F2EKY2|F2EKY2_HORVD	DAGAHGAQVTAEGTQEATATAAEYAK	840.393	3	y10	12.157	996.5	1	y	10	6979.77	5567.81	9130.54	0	0	3045.22	7247.49	5021.58	9894	10343.9	6398.3	9292.68	11786.5	459.482	7713.31	7835.59	8630.98	2482.7	14575.3	10289	8484.23	15518.4	10120.7	7225.05	6497.2	5061.93	3872.11	1763.47	703.245	2753.05	7700.82	11491	11139.8	7451.58	8284.21	8489.47
tr|F2EKY2|F2EKY2_HORVD	DAGAHGAQVTAEGTQEATATAAEYAK	840.393	3	b13	12.157	1165.52	1	b	13	0	2210.1	3253.37	710.744	2164.3	656.936	4247.68	1919.55	3464.81	2834.56	2831.44	4233.92	3210.28	2207.03	2644.32	2512.9	1931.01	2281.69	3523.44	2974.76	3479.47	3425.88	1337.32	2246.69	1288.52	1756.81	887.668	1142.28	263.861	532.729	2334.47	2971.49	3147.63	2116.02	3152.02	2273.37
tr|F2EKY2|F2EKY2_HORVD	DAGAHGAQVTAEGTQEATATAAEYAK	840.393	3	y9	12.157	925.463	1	y	9	4045.54	6050.59	7285.21	0	1940.75	2912.5	9090.86	7792.18	9515.92	12123.6	6661.69	8373.12	14941.4	1090.8	6370.13	10122.2	9800.93	3950.81	15095.6	10211.5	8300.83	12114.6	7862.79	5028.95	5586.34	4383.74	2830.43	3054.79	0	3058.77	8146.31	10005.6	11698.5	5000.8	7888.82	8377.18
tr|F2EKY2|F2EKY2_HORVD	DAGAHGAQVTAEGTQEATATAAEYAK	840.393	3	b12	12.157	1108.5	1	b	12	8087.16	4311.11	5211.64	2057.62	1812.17	1651.2	6985.63	4223.84	8419.54	9643.74	6008.11	6352.75	7239.79	334.251	6210.08	6507.98	5997.15	2976.05	11136	6933.23	7607.16	13144.4	6447.36	5145.87	3771.11	2837.57	2250.12	1249.7	344.984	957.438	6853.45	7351.67	15415.8	4827.06	7803.97	5194.17
tr|F2EKY2|F2EKY2_HORVD	DAGAHGAQVTAEGTQEATATAAEYAK	840.393	3	y11	12.157	1125.54	1	y	11	3956.05	3875.67	5843.95	2537.4	4318.49	2256.89	4492.19	4453.1	5248.88	6847.42	6310.76	5782.47	12374.8	823.909	5388.24	6222.24	6233.91	3164.42	12748.9	5080.5	5703.12	7989.56	5048.11	2997.45	2982.08	3154.25	2254.52	1961.65	1209.78	945.061	5508.6	8220.13	7610.04	3947.87	4271.69	7815.01
tr|F2EKY2|F2EKY2_HORVD	DAGAHGAQVTAEGTQEATATAAEYAK	840.393	3	b11	12.157	979.459	1	b	11	4831.67	3766.44	5957.65	691.209	2988.43	0	5468.63	4756.17	5938.94	8415.8	4353.05	5298.84	7669.83	862.65	4896.03	5208.77	6375.37	2162.43	9270.28	7674.94	6911.83	9134.93	6506.55	3240.01	3501.41	3269.27	2044.76	2529.77	231.46	0	5508.28	7880.68	8243.16	3629.73	5852.66	5586.22
tr|F2EKY2|F2EKY2_HORVD	AKEVTVSTGGTAAEYAK	561.625	3	y5	7.95685	581.293	1	y	5	35049.6	33665.4	35982	25073.5	1368.11	18025.1	36829.3	29087.3	31013.6	45854.9	34782.9	29911.6	46275	21942.9	34422	29630.8	37098.1	18702.3	43632.5	37227.8	32384	38907.6	29908.2	17359.6	23372.8	22096.4	16461.3	6053.12	3227.95	20554.3	28793.8	36129.7	41848.4	23113.8	29019.8	44130
tr|F2EKY2|F2EKY2_HORVD	AKEVTVSTGGTAAEYAK	561.625	3	y9	7.95685	867.421	1	y	9	39908.9	39717.5	57515.8	37388.2	0	35901.2	43282	30162.1	47577.5	52566.9	33639.8	40109.1	43586.6	36580.7	37703.4	40411.5	41569.1	21956	47053	38426.8	35485.2	49522.2	29060.4	17703.2	22593.5	37511.2	11765.4	0	1831.54	0	35440.5	48956	68633.5	24521.4	41643.8	44409.2
tr|F2EKY2|F2EKY2_HORVD	AKEVTVSTGGTAAEYAK	561.625	3	y6	7.95685	652.33	1	y	6	30317.1	24980.2	34726.3	0	0	16691.2	32851.3	25029.7	25159.1	30600.5	28000	26590.2	39525.5	19302.3	29761.2	27316.9	34254.7	20677.6	52210.8	28999.9	30497.3	37834.6	30214	14299.6	20180.2	21780.4	11015.3	0	2126.58	9156.72	27018.7	31395.1	34639.1	16261.2	29336.9	30587.6
tr|F2EKY2|F2EKY2_HORVD	AKEVTVSTGGTAAEYAK	561.625	3	y8	7.95685	810.399	1	y	8	28452.2	22878.8	35810.7	0	435.061	0	24528.6	26508.2	25926.8	33689.2	27170.9	19980.5	36525	20600.8	25594.6	26932.3	32606	14983.7	28751.9	20429.2	20771.6	28880.1	18189.6	14602.6	15656.8	22351.2	19704.4	7970.21	3089.18	9386.47	27745	30038.6	28628.9	16014.6	26693.9	25304.4
tr|F2EKY2|F2EKY2_HORVD	AKEVTVSTGGTAAEYAK	561.625	3	y13	7.95685	628.312	2	y	13	11573.7	5939.93	0	4935.94	0	8544.78	0	0	0	0	10228.4	10897.9	24099.6	11809.7	0	0	0	0	24832.1	0	0	14612.9	12203.9	0	7334.89	0	15142.5	8707.34	4304.63	11038	10541.1	7713.26	0	0	5768.26	0
tr|F2EKY2|F2EKY2_HORVD	AKEVTVSTGGTAAEYAK	561.625	3	y7	7.95685	753.378	1	y	7	12963.8	8325.82	14793.2	12670.5	768.149	12963.8	0	11721.4	14747.6	16223.7	0	15640.8	24221.5	11028	17147.1	0	27926.2	11340.4	0	7020.95	12875.7	28431.3	13212.6	5718.33	9598.26	7765.03	0	19569.6	385.767	1787.3	19559.4	15338.9	15493.9	12085.4	9594.67	11504.1
tr|F2EKY2|F2EKY2_HORVD	EVTVSTGGTAAEYAK	742.367	2	y10	9.27995	968.468	1	y	10	5788.51	883.411	0	3048.94	2826.39	1493.59	5236.51	3737.44	3809.79	16025.5	3097.97	0	5496.83	1260.58	2063.68	5237	5827.47	3340.74	5523.69	4904.08	5291.56	5823.62	3589.97	2798.13	1344.62	0	2317.48	779.578	900.375	1444.79	3933.73	4914.56	6094.14	0	1226.37	508.265
tr|F2EKY2|F2EKY2_HORVD	EVTVSTGGTAAEYAK	742.367	2	y11	9.27995	1055.5	1	y	11	9293.08	5597.25	6418.33	6041.21	5592.97	2320.48	11730.9	8942.56	14092.1	0	9860.36	5175.61	11828.1	5118.71	8848.77	10737.4	13814.2	7471.21	15249.3	10178.1	10503	14816.4	10018.9	7208.98	2738.43	153.891	2991.36	1687.59	859.952	0	8807.38	12207.2	16257.1	0	2574.65	0
tr|F2EKY2|F2EKY2_HORVD	EVTVSTGGTAAEYAK	742.367	2	y13	9.27995	1255.62	1	y	13	2006.65	0	1416.77	1395.64	1660.5	0	3500.62	1798.46	0	1481.59	2384	1112.49	2231.31	565.808	0	2368.94	3503.16	2665.61	6774.96	2773.76	2909.59	3340.49	2291.88	1379.96	724.087	328.411	1543.6	323.903	626.887	360.522	2315.52	2218.54	3015.55	252.67	531.34	0
tr|F2EKY2|F2EKY2_HORVD	EVTVSTGGTAAEYAK	742.367	2	y9	9.27995	867.421	1	y	9	0	4309.43	5044.89	2586.41	1435.17	1645.2	4325.33	3174.7	4666.34	4004.54	3511.82	2997.1	5903.15	5311.47	3552.59	4902.6	7537.36	3771.85	7359.22	4804.33	5109.56	5513.98	4411.3	2466.52	3027.74	634.052	2060.44	2619.81	161.059	528.285	4272.37	5745.12	6447.28	588.745	1110.11	264.836
tr|F2EKY2|F2EKY2_HORVD	EVTVSTGGTAAEYAK	742.367	2	y12	9.27995	1154.57	1	y	12	7201.79	1767.99	1092.7	3331.57	2739.32	0	4691.15	4464.9	3438.82	7634.63	4925.14	1188.4	5201.41	804.913	938.799	5817.66	7970.36	2724.15	9128.51	4766.95	3613.21	5106.96	3180.9	1886.52	1617.31	97.5336	5045.99	0	635.146	345.609	3964.74	3838.07	4673.48	782.702	860.093	0
tr|F2EKY2|F2EKY2_HORVD	EVTVSTGGTAAEYAK	742.367	2	y8	9.27995	810.399	1	y	8	0	1316.78	4461.75	3622.31	3113.59	618.069	3787.49	4004.79	3202.37	0	0	827.52	0	413.85	1159.32	0	0	0	4126.94	2190.33	2357.37	5354.74	2226.18	3330.59	0	924.753	4245.26	989.845	1426.56	824.835	2571.85	2972.49	3424.56	1919	603.232	1541.87
tr|F2EKY2|F2EKY2_HORVD	GKDVTVSTGGTAAEYAK	827.918	2	y13	7.94088	1255.62	1	y	13	1652.13	1805.92	2744.78	837.876	0	0	4218.17	294.03	1533.37	1911.88	173.038	1903.07	2751.68	528.591	1710.62	903.071	2541.94	1073.98	2756.51	2676.84	1725.8	3394.03	2022.12	968.408	967.063	1602.6	451.134	300.736	101.626	2635.56	2396.7	2437.14	3124.65	752.345	1492.93	4237.57
tr|F2EKY2|F2EKY2_HORVD	GKDVTVSTGGTAAEYAK	827.918	2	y11	7.94088	1055.5	1	y	11	7818.41	3557.37	6730.9	6437.34	241.952	2142.62	6604.33	135.276	4248.86	3092.71	139.906	6218.6	6215.61	3760.84	5935.23	1135.75	4072.76	2642.05	8628.08	5127.5	2858.94	4759.8	3873.53	2065.66	1751.08	1842.02	0	1171.63	0	819.377	2643.62	5312.72	7564.72	2491.7	4963.31	6392.01
tr|F2EKY2|F2EKY2_HORVD	GKDVTVSTGGTAAEYAK	827.918	2	y10	7.94088	968.468	1	y	10	3083.24	1193.86	2334.57	1411.1	0	1724.85	1659.57	0	1427.19	0	0	2016.98	1561.2	865.303	367.734	2455.56	1674.83	898.111	0	1529.99	957.327	1547.9	878.603	288.705	982.188	782.994	0	621.867	0	0	0	2218.86	2092.02	213.762	846.744	1113.04
tr|F2EKY2|F2EKY2_HORVD	GKDVTVSTGGTAAEYAK	827.918	2	y9	7.94088	867.421	1	y	9	4677.32	1403.39	2672.37	1715.33	422.243	0	3027.74	186.874	1907.31	5165.08	445.169	2928.02	2347.79	237.267	1949.33	1352.19	1985.08	1209.03	3096.53	2063.73	2941.53	2143.93	2093.94	717.79	1359.57	2707.77	1671.07	0	34.7874	534.712	2160.14	1794.85	2940.19	671.494	1552.84	1714.39
tr|F2EKY2|F2EKY2_HORVD	GKDVTVSTGGTAAEYAK	827.918	2	b14	7.94088	1274.62	1	b	14	0	0	0	1014.63	756.49	47.3221	0	0	0	1482.32	0	475.959	2055.44	0	0	316.249	0	0	0	0	0	364.786	764.979	0	0	0	0	72.9384	59.8717	0	0	609.993	761.778	0	0	702.395
tr|F2EKY2|F2EKY2_HORVD	GKDVTVSTGGTAAEYAK	827.918	2	y14	7.94088	1354.68	1	y	14	1504.61	373.47	0	331.828	55.8038	231.221	620.502	38.1055	735.602	579.445	466.668	667.939	865.985	894.717	786.242	0	501.03	114.225	801.94	877.891	794.203	789.25	736.727	215.184	283.64	545.91	412.356	347.232	0	75.4342	322.938	1348.57	901.036	224.221	498.982	879.271
tr|F2EKY2|F2EKY2_HORVD	FRAEAQQHSADAIR	533.938	3	y6	7.23335	632.336	1	y	6	0	8097.93	12451.4	918.033	1419.73	0	0	4366.67	2650.81	1598.48	724.497	1364.57	1260.73	452.868	0	5002.76	0	5779.25	3466.52	7092.57	0	1801.19	0	159.446	0	8411.15	5434.53	3107.53	252.521	0	0	8594.62	3170.74	417.98	1587.94	2876.47
tr|F2EKY2|F2EKY2_HORVD	FRAEAQQHSADAIR	533.938	3	b7	7.23335	831.411	1	b	7	3059.55	605.26	799.716	0	384.416	3787.46	0	631.106	3384.09	852.746	522.463	736.315	2174.35	0	733.231	563.812	0	1439.22	3173.65	1536.04	558.237	1027.28	362.833	0	539.743	435.957	1229.68	0	930.675	0	916.909	0	1365.3	465.879	1821.94	935.238
tr|F2EKY2|F2EKY2_HORVD	FRAEAQQHSADAIR	533.938	3	b6	7.23335	703.352	1	b	6	17247.6	5920.48	0	0	0	3194.91	3323.13	0	618.77	0	261.073	0	0	4361.06	1656.76	0	7697.4	1255.25	0	1793.51	2269.98	0	1370.05	1292.08	0	1089.27	5182.21	976.764	900.72	13151.2	424.272	691.475	1024.2	873.838	970.958	477.053
tr|F2EKY2|F2EKY2_HORVD	FRAEAQQHSADAIR	533.938	3	b11	7.23335	621.286	2	b	11	0	0	20552	206.83	143.429	0	0	0	0	0	0	0	682.303	0	0	1181.45	0	0	2888.92	17252.4	0	1579.91	2634.3	0	1518.95	0	9548.59	857.264	1348.5	0	1135.66	0	0	455.244	0	0
tr|F2EKY2|F2EKY2_HORVD	FRAEAQQHSADAIR	533.938	3	y7	7.23335	769.395	1	y	7	1992.02	1714.41	0	0	111.493	0	5906.42	0	0	967.301	959.517	733.643	705.394	900.034	7952.7	0	1017.85	3891.75	0	1496.32	378.017	591.25	962.217	0	0	1575.87	0	12848.5	1947.36	321.948	505.897	2356.43	0	224.63	702.876	483.706
tr|F2EKY2|F2EKY2_HORVD	FRAEAQQHSADAIR	533.938	3	y3	7.23335	359.24	1	y	3	519.873	195.903	755.925	1031.13	115.452	22870.6	818.582	6730.62	971.269	1075.25	228.716	593.697	0	543.75	0	0	1201.92	10411	1606.88	0	0	901.216	1261.23	292.913	2745.04	3771.25	1573.83	1416.28	0	1596.74	0	3057.53	883.097	115.493	1591.96	2415.02
tr|F8KAD3|F8KAD3_SACPS	NNYLAPAYDYLR	736.862	2	y7	17.619	897.446	1	y	7	37678	2012.8	37535.7	2784.88	5916.66	0	2620.09	0	3865.07	13717.8	518.243	924.667	47556.3	59126.3	55899.1	42049.4	55244.5	27559.9	31055	22839	24501.2	28506.7	20912.3	18111.8	810.595	2295.36	1549.22	3863.37	1377.62	2702.71	514.098	25204.8	23003.2	1262.29	3714.39	0
tr|F8KAD3|F8KAD3_SACPS	NNYLAPAYDYLR	736.862	2	y8	17.619	968.484	1	y	8	16301.2	1197.78	13061.1	2319.13	0	685.649	1066.61	9687.79	1800.69	0	960.258	2651.27	24887.2	28716.4	32398	26107	34901.3	15920.8	15631.3	11295.7	12222.1	17375	10993.3	9955.66	3947.74	3617.92	1059.63	3881.63	1271.79	3786.26	3251.5	0	8045.22	782.17	0	9080.17
tr|F8KAD3|F8KAD3_SACPS	NNYLAPAYDYLR	736.862	2	y9	17.619	1081.57	1	y	9	0	3648.53	4235.19	1757.06	1528.37	2674.8	1337.9	1736.77	2927.48	0	0	1221.4	18135.4	17091.6	30179.2	19464.4	20686.9	11318.6	9519.16	9864.8	8936.13	12136.7	8831.5	6942.49	2290.1	819.673	1106.47	0	0	0	1962.08	0	1660.16	1919.95	3530.12	5281.8
tr|F8KAD3|F8KAD3_SACPS	NNYLAPAYDYLR	736.862	2	y10	17.619	1244.63	1	y	10	5824.03	319.994	2095.73	0	281.436	0	0	0	0	0	1455.8	0	6976	7360.52	8703.75	6897.27	12944.9	4551.45	4191.48	4161.31	4611.41	8269.92	3744.62	2721.93	0	498.492	0	1418.62	0	2059.53	0	2331.32	2972.8	0	0	3839.25
tr|F8KAD3|F8KAD3_SACPS	NNYLAPAYDYLR	736.862	2	y6	17.619	800.394	1	y	6	14602.4	5496.11	13821.6	0	0	2855.5	4015.69	9539.82	4205.17	11853.2	15367.4	1583.81	0	0	0	0	0	0	0	0	0	0	0	0	2725.33	2995.53	3022.11	11981	3156.69	945.465	2784.46	0	9709.52	2081.62	3394.12	16207
tr|F8KAD3|F8KAD3_SACPS	NNYLAPAYDYLR	736.862	2	b3	17.619	392.156	1	b	3	16438.6	0	14970.7	17724.7	12901.6	24356	18819.7	0	22640.2	119151	0	21854	44774.7	34150.5	53443.6	35595.2	40994.7	25420	0	0	29761.4	0	0	19970.1	13749.2	13948.1	9133.42	15662.7	2698.88	0	22687.9	10440.6	6753.8	26498.6	34471.3	0
tr|F8KAD3|F8KAD3_SACPS	GVNIGGWLVLEPYITPSLFEAFR	860.128	3	y8	36.6879	966.504	1	y	8	0	111.639	318.571	0	214.731	509.385	151.298	57.5187	144.601	475.703	620.609	286.196	41025	28162.5	25858.8	24752.2	35961.5	17280.2	10250.1	3619.82	4479.48	17613.1	9382.98	4571.7	163.593	109.974	287.738	483.403	0	283.272	453.865	0	0	231.894	198.72	206.639
tr|F8KAD3|F8KAD3_SACPS	GVNIGGWLVLEPYITPSLFEAFR	860.128	3	y9	36.6879	1067.55	1	y	9	1010.14	0	887.037	0	457.962	1558.35	161.475	0	124.912	840.158	2124.07	331.266	17435.4	10922.4	11569.7	10996.4	16632.7	7329.8	4460.05	1841.51	1532.45	6563.85	3316.67	2409.02	1060.57	824.64	1399.83	260.636	986.734	385.989	1236.43	723.351	0	425.709	295.001	0
tr|F8KAD3|F8KAD3_SACPS	GVNIGGWLVLEPYITPSLFEAFR	860.128	3	y12	36.6879	1440.75	1	y	12	914.027	0	86.5456	41.3558	90.0846	196.332	0	171.993	29.9261	463.928	152.976	59.6095	10637.2	6958.04	7433.45	6078.09	9062.07	4064.46	3441.88	805.482	1507.93	4396.13	2487.72	1682.21	163.675	232.392	760.778	59.8212	533.246	0	69.9533	85.1651	596.314	0	175.514	0
tr|F8KAD3|F8KAD3_SACPS	GVNIGGWLVLEPYITPSLFEAFR	860.128	3	y10	36.6879	1180.64	1	y	10	159.491	59.4999	269.847	0	46.5306	158.706	73.6426	330.322	91.8343	210.937	720.06	179.935	5722	3732.7	4485.36	4818.68	5006.88	2680.41	2011.59	606.378	741.324	3321.67	1430.68	871.75	385.223	0	650.1	103.857	415.166	139.918	259.951	566.086	188.054	263.775	0	36.1524
tr|F8KAD3|F8KAD3_SACPS	GVNIGGWLVLEPYITPSLFEAFR	860.128	3	y11	36.6879	1343.7	1	y	11	259.328	171.612	272.768	193.012	83.2709	292.741	331.026	129.45	600.866	0	115.696	241.549	0	1622.4	1697.39	1725.67	1937.87	1694.76	0	224.358	638.741	1089.73	462.403	509.739	331.872	107.88	0	0	0	349.243	55.8239	405.916	203.624	438.945	263.821	0
tr|F8KAD3|F8KAD3_SACPS	GVNIGGWLVLEPYITPSLFEAFR	860.128	3	b14	36.6879	1511.83	1	b	14	25.8897	252.164	55.8239	38.072	0	135.935	0	0	190.38	0	213.984	0	0	0	0	0	0	0	0	0	0	0	0	0	55.8277	193.449	141.615	87.7783	125.329	127.878	152.268	190.149	0	112.208	0	59.871
tr|F8KAD3|F8KAD3_SACPS	IPIGYWAFETLDNDPYVTGIQESYLDQAIGWAR	951.216	4	y11	34.6822	1279.64	1	y	11	0	0	377.8	145.51	304.642	736.034	540.545	156.644	0	455.541	1052.69	0	4720.33	3204.47	3616.6	3578.45	3780.56	2506.32	1541.9	1168.54	1531.42	2391.95	260.122	1068.92	932.158	334.888	0	308.781	1018.42	160.417	0	0	0	953.116	0	665.103
tr|F8KAD3|F8KAD3_SACPS	IPIGYWAFETLDNDPYVTGIQESYLDQAIGWAR	951.216	4	b12	34.6822	1406.7	1	b	12	0	295.597	222.283	163.612	0	0	712.159	85.7438	0	317.791	1328.02	556.273	1290.07	791.317	868.966	1443.37	908.815	1298.25	464.279	144.052	334.79	693.822	246.522	440.747	0	0	314.409	188.815	0	73.6482	274.386	693.848	447.568	214.147	528.592	262.175
tr|F8KAD3|F8KAD3_SACPS	IPIGYWAFETLDNDPYVTGIQESYLDQAIGWAR	951.216	4	y9	34.6822	1029.55	1	y	9	0	664.401	1915.46	444.888	449.887	595.87	153.293	1973.05	161.878	650.414	490.055	347.364	7298.32	6376.77	7606.09	5488.84	8027.03	3833.12	3335.64	2506.02	3062.42	4664.03	587.485	1926.05	0	0	734.843	192.709	4098.47	909.669	171.421	304.895	711.508	802.353	200.161	558.047
tr|F8KAD3|F8KAD3_SACPS	IPIGYWAFETLDNDPYVTGIQESYLDQAIGWAR	951.216	4	b9	34.6822	1077.54	1	b	9	693.859	225.61	511.796	923.958	323.101	1346.75	368.257	623.494	180.172	345.729	197.523	748.696	4315.28	3497.17	3397.6	2685.24	4434.52	1892.77	2740.11	868.019	874.577	1775.94	74.7949	1111.68	2433.75	894.084	292.934	523.931	1579.01	125.203	416.763	488.763	99.1923	779.225	0	1653.66
tr|F8KAD3|F8KAD3_SACPS	IPIGYWAFETLDNDPYVTGIQESYLDQAIGWAR	951.216	4	b10	34.6822	1178.59	1	b	10	901.549	299.178	0	0	1052.28	1090.9	119.001	289.369	197.424	345.854	465.969	1381.82	2915.23	1418.02	1359.83	1536.06	2502.28	1355.06	657.326	396.643	1067.04	1278.84	141.635	754.251	4310.46	892.731	0	2226.47	2877.19	0	223.739	924.102	348.138	451.238	422.85	0
[truncated: 2,202 more rows]

## Sheet: Area - peptides
Protein	Peptide	Precursor MZ	Precursor Charge	RT	20141127_Michele_SWATH_S2_1 (20141127_Michele_SWATH_S2_1.wiff (sample 1))	20141127_Michele_SWATH_S2_2 (20141127_Michele_SWATH_S2_2.wiff (sample 1))	20141127_Michele_SWATH_S2_3 (20141127_Michele_SWATH_S2_3.wiff (sample 1))	20141127_Michele_SWATH_S2_5 (20141127_Michele_SWATH_S2_4.wiff (sample 1))	20141127_Michele_SWATH_S2_6 (20141127_Michele_SWATH_S2_5.wiff (sample 1))	20141127_Michele_SWATH_S2_7 (20141127_Michele_SWATH_S2_6.wiff (sample 1))	20141127_Michele_SWATH_S2_9 (20141127_Michele_SWATH_S2_7.wiff (sample 1))	20141127_Michele_SWATH_S2_10 (20141127_Michele_SWATH_S2_8.wiff (sample 1))	20141127_Michele_SWATH_S2_11 (20141127_Michele_SWATH_S2_9.wiff (sample 1))	20141127_Michele_SWATH_S2_13 (20141127_Michele_SWATH_S2_10.wiff (sample 1))	20141127_Michele_SWATH_S2_14 (20141127_Michele_SWATH_S2_11.wiff (sample 1))	20141127_Michele_SWATH_S2_15 (20141127_Michele_SWATH_S2_12.wiff (sample 1))	20141127_Michele_SWATH_S3_1 (20141127_Michele_SWATH_S3_1.wiff (sample 1))	20141127_Michele_SWATH_S3_2 (20141127_Michele_SWATH_S3_2.wiff (sample 1))	20141127_Michele_SWATH_S3_3 (20141127_Michele_SWATH_S3_3.wiff (sample 1))	20141127_Michele_SWATH_S3_5 (20141127_Michele_SWATH_S3_5.wiff (sample 1))	20141127_Michele_SWATH_S3_6 (20141127_Michele_SWATH_S3_6.wiff (sample 1))	20141127_Michele_SWATH_S3_7 (20141127_Michele_SWATH_S3_7.wiff (sample 1))	20141127_Michele_SWATH_S3_9 (20141127_Michele_SWATH_S3_9.wiff (sample 1))	20141127_Michele_SWATH_S3_10 (20141127_Michele_SWATH_S3_10.wiff (sample 1))	20141127_Michele_SWATH_S3_11 (20141127_Michele_SWATH_S3_11.wiff (sample 1))	20141127_Michele_SWATH_S3_13 (20141127_Michele_SWATH_S3_13.wiff (sample 1))	20141127_Michele_SWATH_S3_14 (20141127_Michele_SWATH_S3_14.wiff (sample 1))	20141127_Michele_SWATH_S3_15 (20141127_Michele_SWATH_S3_15.wiff (sample 1))	20141127_Michele_SWATH_SI_1 (20141127_Michele_SWATH_SI_1.wiff (sample 1))	20141127_Michele_SWATH_SI_2 (20141127_Michele_SWATH_SI_2.wiff (sample 1))	20141127_Michele_SWATH_SI_3 (20141127_Michele_SWATH_SI_3.wiff (sample 1))	20141127_Michele_SWATH_SI_5 (20141127_Michele_SWATH_SI_5.wiff (sample 1))	20141127_Michele_SWATH_SI_6 (20141127_Michele_SWATH_SI_6.wiff (sample 1))	20141127_Michele_SWATH_SI_7 (20141127_Michele_SWATH_SI_7.wiff (sample 1))	20141127_Michele_SWATH_SI_9 (20141127_Michele_SWATH_SI_9.wiff (sample 1))	20141127_Michele_SWATH_SI_10 (20141127_Michele_SWATH_SI_10.wiff (sample 1))	20141127_Michele_SWATH_SI_11 (20141127_Michele_SWATH_SI_11.wiff (sample 1))	20141127_Michele_SWATH_SI_13 (20141127_Michele_SWATH_SI_13.wiff (sample 1))	20141127_Michele_SWATH_SI_14 (20141127_Michele_SWATH_SI_14.wiff (sample 1))	20141127_Michele_SWATH_SI_15 (20141127_Michele_SWATH_SI_15.wiff (sample 1))
[truncated: 561 more rows]

[truncated: 4 more sheets: Area - proteins, Score, FDR, Observed RT]
